# Supplementary material for: Barriers and facilitators perceived by healthcare professionals for implementing lifestyle interventions in patients with osteoarthritis: a scoping review
Source: PubMed Central journal article supplement (PMC8808449; doi:10.1136/bmjopen-2021-056831), 2022-02-01
Supplement: bmjopen-2021-056831.draft_revisions.pdf [file bmjopen-2021-056831.draft_revisions.pdf]

# BMJ Open

BMJ Open is committed to open peer review. As part of this commitment we make the peer review history of every article we publish publicly available.

When an article is published we post the peer reviewers' comments and the authors' responses online. We also post the versions of the paper that were used during peer review. These are the versions that the peer review comments apply to.

The versions of the paper that follow are the versions that were submitted during the peer review process. They are not the versions of record or the final published versions. They should not be cited or distributed as the published version of this manuscript.

BMJ Open is an open access journal and the full, final, typeset and author-corrected version of record of the manuscript is available on our site with no access controls, subscription charges or pay-per-view fees (<http://bmjopen.bmj.com>).

If you have any questions on BMJ Open's open peer review process please email [info.bmjopen@bmj.com](mailto:info.bmjopen@bmj.com)

# BMJ Open

## Barriers and facilitators perceived by healthcare professionals for implementing lifestyle interventions in patients with osteoarthritis: a systematic scoping review

|                               |                                                                                                                                                                                                                                                                                                                                                                                                                                                                                                                                                                                                                                                                                                                                                                                                                                                                                                     |
|-------------------------------|-----------------------------------------------------------------------------------------------------------------------------------------------------------------------------------------------------------------------------------------------------------------------------------------------------------------------------------------------------------------------------------------------------------------------------------------------------------------------------------------------------------------------------------------------------------------------------------------------------------------------------------------------------------------------------------------------------------------------------------------------------------------------------------------------------------------------------------------------------------------------------------------------------|
| Journal:                      | <i>BMJ Open</i>                                                                                                                                                                                                                                                                                                                                                                                                                                                                                                                                                                                                                                                                                                                                                                                                                                                                                     |
| Manuscript ID                 | bmjopen-2021-056831                                                                                                                                                                                                                                                                                                                                                                                                                                                                                                                                                                                                                                                                                                                                                                                                                                                                                 |
| Article Type:                 | Original research                                                                                                                                                                                                                                                                                                                                                                                                                                                                                                                                                                                                                                                                                                                                                                                                                                                                                   |
| Date Submitted by the Author: | 30-Aug-2021                                                                                                                                                                                                                                                                                                                                                                                                                                                                                                                                                                                                                                                                                                                                                                                                                                                                                         |
| Complete List of Authors:     | Bouma, Sjoukje; University of Groningen, University Medical Center Groningen, Department of Orthopedics<br>van Beek, Juliette; University of Groningen, University Medical Center Groningen, Department of Orthopedics; University of Groningen, University Medical Center Groningen, Center for Human Movement Sciences<br>Diercks, Ron; University of Groningen, University Medical Center Groningen, Department of Orthopedics<br>van der Woude, Lucas; University of Groningen, University Medical Center Groningen, Center for Human Movement Sciences; University of Groningen, University Medical Center Groningen, Department of Rehabilitation Medicine<br>Stevens, Martin; University of Groningen, University Medical Center Groningen, Department of Orthopedics<br>van den Akker-Scheek, Inge; University of Groningen, University Medical Center Groningen, Department of Orthopedics |
| Keywords:                     | ORTHOPAEDIC & TRAUMA SURGERY, Hip < ORTHOPAEDIC & TRAUMA SURGERY, Knee < ORTHOPAEDIC & TRAUMA SURGERY, Musculoskeletal disorders < ORTHOPAEDIC & TRAUMA SURGERY, REHABILITATION MEDICINE, SPORTS MEDICINE                                                                                                                                                                                                                                                                                                                                                                                                                                                                                                                                                                                                                                                                                           |
|                               |                                                                                                                                                                                                                                                                                                                                                                                                                                                                                                                                                                                                                                                                                                                                                                                                                                                                                                     |

SCHOLARONE™  
Manuscripts

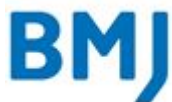

I, the Submitting Author has the right to grant and does grant on behalf of all authors of the Work (as defined in the below author licence), an exclusive licence and/or a non-exclusive licence for contributions from authors who are: i) UK Crown employees; ii) where BMJ has agreed a CC-BY licence shall apply, and/or iii) in accordance with the terms applicable for US Federal Government officers or employees acting as part of their official duties; on a worldwide, perpetual, irrevocable, royalty-free basis to BMJ Publishing Group Ltd ("BMJ") its licensees and where the relevant Journal is co-owned by BMJ to the co-owners of the Journal, to publish the Work in this journal and any other BMJ products and to exploit all rights, as set out in our [licence](#).

The Submitting Author accepts and understands that any supply made under these terms is made by BMJ to the Submitting Author unless you are acting as an employee on behalf of your employer or a postgraduate student of an affiliated institution which is paying any applicable article publishing charge ("APC") for Open Access articles. Where the Submitting Author wishes to make the Work available on an Open Access basis (and intends to pay the relevant APC), the terms of reuse of such Open Access shall be governed by a Creative Commons licence – details of these licences and which [Creative Commons](#) licence will apply to this Work are set out in our licence referred to above.

Other than as permitted in any relevant BMJ Author's Self Archiving Policies, I confirm this Work has not been accepted for publication elsewhere, is not being considered for publication elsewhere and does not duplicate material already published. I confirm all authors consent to publication of this Work and authorise the granting of this licence.

1  
2  
3 1 **Title: “Barriers and facilitators perceived by healthcare professionals for implementing**  
4  
5 2 **lifestyle interventions in patients with osteoarthritis: a systematic scoping review”**  
6  
7  
8 3

9  
10 4 S.E. (Sjoukje) Bouma<sup>1</sup>, J.F.E. (Juliette) van Beek<sup>1,2</sup>, R.L. (Ron) Diercks<sup>1</sup>, L.H.V. (Lucas) van  
11  
12 5 der Woude<sup>2,3,4</sup>, M. (Martin) Stevens<sup>1\*</sup>, I. (Inge) van den Akker-Scheek<sup>1\*</sup>  
13  
14 6

15  
16  
17 7 <sup>1</sup> University of Groningen, University Medical Center Groningen, Department of Orthopedics,  
18  
19 8 Groningen, The Netherlands

20  
21 9 <sup>2</sup> University of Groningen, University Medical Center Groningen, Center for Human  
22  
23 10 Movement Sciences, Groningen, The Netherlands

24  
25  
26 11 <sup>3</sup> University of Groningen, University Medical Center Groningen, Department of  
27  
28 12 Rehabilitation Medicine, Groningen, The Netherlands

29  
30 13 <sup>4</sup> Peter Harrison Centre for Disability Sport, School of Sport, Exercise and Health Sciences,  
31  
32 14 Loughborough University, United Kingdom  
33  
34 15

35  
36  
37 16 \* These authors contributed equally to this work.  
38  
39  
40 17

41  
42 18 ***Corresponding author:***

43  
44 19 S.E. (Sjoukje) Bouma

45  
46 20 University of Groningen, University Medical Center Groningen

47  
48 21 Department of Orthopedics (BB51)

49  
50 22 PO Box 30.001

51  
52 23 9700 RB Groningen, The Netherlands

53  
54 24 E-mail: [s.e.bouma@umcg.nl](mailto:s.e.bouma@umcg.nl)  
55  
56  
57  
58  
59  
60

1  
2  
3 **25 Abstract**  
4

5 **26 Objective:** To provide an overview of barriers and facilitators that healthcare professionals  
6  
7  
8 **27 (HCPs) perceive regarding the implementation of lifestyle interventions (LIs) in patients with**  
9  
10 **28 hip and/or knee osteoarthritis (OA).**

11  
12 **29 Design:** Systematic scoping review.

13  
14 **30 Methods:** The databases PubMed, Embase, CINAHL, PsycINFO, and the Cochrane Library  
15  
16  
17 **31 were searched up to January 2021. Primary research articles with a quantitative, qualitative or**  
18  
19 **32 mixed-methods design were eligible for inclusion if they reported: (1) perceptions of primary**  
20  
21 **33 and/or secondary HCPs (*population*); (2) on implementing LIs with physical activity and/or**  
22  
23 **34 weight management as key components (*concept*); (3) on conservative management of hip**  
24  
25 **35 and/or knee OA (*context*). Barriers and facilitators were extracted by two researchers**  
26  
27 **36 independently and linked to a framework based on the Tailored Implementation for Chronic**  
28  
29 **37 Diseases checklist.**

30  
31  
32 **38 Results:** Thirty-six articles were included. In total, 809 factors were extracted and subdivided  
33  
34  
35 **39 into nine domains: intervention factors (n=315); individual HCP factors (n=144); patient**  
36  
37 **40 factors (n=137); professional interactions (n=101); incentives and resources (n=56); capacity**  
38  
39 **41 for organizational change (n=7); social, political and legal factors (n=9); patient and HCP**  
40  
41 **42 interactions (n=19); and disease factors (n=21).**

42  
43 **43 Conclusions:** Multiple individual and environmental factors influence the implementation of  
44  
45 **44 LIs by HCPs in patients with hip and/or knee OA. The resulting overview of barriers and**  
46  
47 **45 facilitators can guide future research on the implementation of LIs within OA care. To**  
48  
49 **46 investigate whether factor frequency is related to the relevance of each domain, further**  
50  
51 **47 research should assess the relative importance of the identified factors involving all relevant**  
52  
53 **48 disciplines of primary and secondary HCPs.**

54  
55  
56 **49 PROSPERO registration number:** CRD42019129348.  
57  
58  
59  
60

1  
2  
3 50  
45 51 *Abstract word count:* 251 (max. 300)  
67 52 *Manuscript word count:* 4176 (max. 4000)  
8  
910 53  
1112 54 **Strengths and limitations of this study**  
13

- 14 55 • This is the first systematic scoping review to classify barriers and facilitators for  
15 56 implementing lifestyle interventions as conservative treatment for hip and/or knee  
16 57 osteoarthritis from the perspective of primary and secondary healthcare professionals.
- 17 58 • Both qualitative and quantitative data were included, providing broad insight into the  
18 59 topic.
- 19 60 • Given the broad definition of “implementing lifestyle interventions”, the identified  
20 61 barriers and facilitators provide insight into the full spectrum of influencing factors  
21 62 rather than being applicable to every single way of implementing lifestyle  
22 63 interventions.
- 23 64 • Grey literature was not included in the search and selection process.

## 65 **Introduction**

66

67 Regular physical activity and weight management are recommended by national and  
68 international clinical guidelines for the conservative management of osteoarthritis (OA)<sup>1-5</sup>.  
69 Previous studies have demonstrated that lifestyle interventions (LIs) focusing on exercise,  
70 alone or combined with dietary weight loss, are able to reduce OA-related disability and to  
71 postpone or even prevent total joint arthroplasty<sup>6-10</sup>. However, these positive results are not  
72 always transferred from research settings to daily practice, which means that LIs are  
73 underutilized<sup>11</sup>. This suboptimal implementation of LIs as treatment for OA can result from  
74 factors related to the patient, the healthcare professional (HCP) or the societal context<sup>12</sup>.  
75 Research on adhering to LIs has so far focused mainly on identifying barriers and facilitators  
76 at the patient level. However, these studies have also shown that HCPs can have a facilitating  
77 role in the lifestyle behavior of their patients, for example by providing advice, education,  
78 encouragement, and instructions<sup>13,14</sup>.

79

80 Some research has already been conducted investigating the perspective of HCPs and the  
81 implementation of LIs in their daily practice. This knowledge is needed in order to enhance  
82 the implementation of LIs. As far as the authors know, no (systematic) literature review has  
83 previously been performed that identified and/or classified barriers and facilitators for  
84 implementing LIs in the conservative treatment of OA from the perspective of HCPs. One  
85 systematic review focused on the views toward OA management based on recommendations  
86 in clinical practice guidelines of HCPs working in primary care<sup>15</sup>. However, HCPs working in  
87 secondary care are also involved in the treatment of patients with OA, which draws attention  
88 to the importance of collaboration and communication between primary and secondary care  
89 practitioners<sup>16</sup>.

1  
2  
3 90  
4  
5 91 A scoping review can be considered a suitable methodology to summarize existing literature  
6  
7 92 on barriers and facilitators for implementing LIs in OA and to identify potential gaps in the  
8  
9 93 current literature on participation of primary and secondary HCPs<sup>17</sup>. To this end, a systematic  
10  
11 94 scoping review was conducted aiming to provide a comprehensive overview of barriers and  
12  
13 95 facilitators perceived by primary and secondary HCPs regarding the implementation of LIs in  
14  
15 96 patients with hip and/or knee OA. The Tailored Implementation for Chronic Diseases (TICD)  
16  
17 97 checklist was used to guide data synthesis<sup>18</sup>.  
18  
19  
20  
21 98

## 23 99 **Method**

### 26 100 27 28 101 *Study design*

29  
30 102 We conducted this systematic scoping review according to the framework developed by  
31  
32 103 Arksey and O'Malley<sup>19</sup>. Five stages were followed successively: (1) identifying the research  
33  
34 104 question; (2) identifying relevant studies; (3) study selection; (4) charting the data; and (5)  
35  
36 105 collating, summarizing and reporting the results<sup>19</sup>. The PRISMA Extension for Scoping  
37  
38 106 Reviews (PRISMA-ScR) checklist was used as reporting guideline<sup>20</sup>. The review protocol  
39  
40 107 was registered in the PROSPERO database (registration number: CRD42019129348).  
41  
42  
43  
44 108

### 46 109 *Data sources and searches*

47  
48 110 A search strategy was developed consisting of four components: search terms related to (1)  
49  
50 111 primary and secondary HCPs; (2) hip and/or knee OA; (3) LIs; and (4) barriers and  
51  
52 112 facilitators. This search strategy was applied in five bibliographic electronic databases (i.e.  
53  
54 113 PubMed, Embase, CINAHL, PsycINFO, and the Cochrane Library) to identify relevant  
55  
56 114 articles up to 19 January 2021. A detailed search strategy for each of the databases can be  
57  
58  
59  
60



1  
2  
3 115 found in Supplemental File 1. Reference lists of included articles were manually searched for  
4  
5 116 additional relevant articles. Primary research articles with a quantitative, qualitative or mixed-  
6  
7 117 methods design were eligible for inclusion; study protocols, reviews, abstracts, and  
8  
9 118 commentaries were excluded. Articles written in English, German, or Dutch were eligible for  
10  
11 119 inclusion. No restrictions were applied regarding publication period.  
12  
13  
14  
15 120

### 16 17 121 *Study selection*

18  
19 122 Eligibility criteria were described according to the Population-Concept-Context framework<sup>21</sup>.  
20  
21 123 First, the study population was defined as all primary and secondary HCPs who are involved  
22  
23 124 in the conservative treatment of patients with hip and/or knee OA. Articles focusing solely on  
24  
25 125 the perspective of patients with hip and/or knee OA were excluded. Second, the concepts  
26  
27 126 central to this review were barriers and facilitators for implementing LIs. Barriers and  
28  
29 127 facilitators were defined as any belief, experience, factor, opinion, reason, or view reported by  
30  
31 128 an HCP that potentially influences (either impedes or facilitates) implementation of LIs in  
32  
33 129 patients with hip and/or knee OA. Implementing LIs was broadly defined, ranging from  
34  
35 130 mentioning or discussing a healthy lifestyle to recommending or running specific lifestyle  
36  
37 131 programs, as long as it was clearly described that physical activity and/or weight management  
38  
39 132 were key components. This definition includes physiotherapeutic exercise interventions  
40  
41 133 (aerobic, functional, or strengthening programs), dietary interventions, and self-management  
42  
43 134 programs. Physiotherapeutic modalities such as acupuncture, manual therapy, and massage,  
44  
45 135 and self-management programs whose content was not specified were not considered LIs and  
46  
47 136 were therefore excluded. Articles not primarily focusing on implementing LIs (e.g.  
48  
49 137 development and evaluation of clinical guidelines, general management of hip and/or knee  
50  
51 138 OA, general patient-practitioner relationship or shared decision-making) also fell outside the  
52  
53 139 scope of this review. Lastly, the context of this review was the conservative treatment of hip  
54  
55  
56  
57  
58  
59  
60

1  
2  
3 140 and/or knee OA in both primary and secondary healthcare settings. Articles focusing on  
4  
5 141 preoperative or postoperative treatment of hip and/or knee OA were excluded. Two  
6  
7 142 researchers (SB together with AJ or JvB) independently assessed the eligibility of the  
8  
9 143 identified articles based on the above criteria in three consecutive rounds: based on (1) title;  
10  
11 144 (2) abstract; and (3) full-text of the article. Any disagreements among the researchers were  
12  
13  
14 145 resolved in consensus meetings.  
15  
16  
17 146

### 19 147 ***Data extraction and quality assessment***

21 148 A data extraction form was created and pilot-tested in order to systematically record study  
22  
23 149 characteristics (first author, year of publication, country of origin, aims/purpose, study design,  
24  
25 150 data collection method, data analysis method, theoretical basis, study population, setting,  
26  
27 151 recruitment method, type of LI, patient population) and outcomes (barriers, facilitators, and/or  
28  
29 152 unclear factors (i.e. an influencing factor, but not clearly defined as barrier or facilitator)).  
30  
31 153 Study quality was assessed with the Mixed Methods Appraisal Tool (MMAT). The MMAT is  
32  
33 154 a critical appraisal tool that can be used in reviews of mixed studies to assess the  
34  
35 155 methodological quality of different study design categories: mixed-methods, qualitative, and  
36  
37 156 quantitative studies (randomized controlled trials, non-randomized studies, and descriptive  
38  
39 157 studies)<sup>22,23</sup>. Since calculating a total score is discouraged<sup>23</sup>, it was chosen to present the  
40  
41 158 ratings of the individual criteria.  
42  
43  
44  
45  
46  
47 159

49 160 Data extraction was performed in two stages. The first stage consisted of filling in the data  
50  
51 161 extraction form and the MMAT for each article, done by two researchers (SB/JvB)  
52  
53 162 independently. Regarding barriers and facilitators, both researchers extracted the relevant  
54  
55 163 units of text and/or descriptive statistics from the Results sections. Any discrepancies between  
56  
57 164 the researchers in this first stage were resolved in consensus meetings. During the second  
58  
59  
60

1  
2  
3 165 stage, the extraction of barriers and facilitators was discussed among the research team  
4  
5 166 (SB/MS/IvdAS) and the process was further refined for both quantitative and qualitative data.  
6  
7 167 Regarding quantitative data, factors were only extracted if  $\geq 50\%$  of participants indicated that  
8  
9 168 the factor influenced the implementation of LIs<sup>24,25</sup>. For close-ended questions or attitude  
10  
11 169 statements with multiple answer options, participants were classified as being “in agreement”  
12  
13 170 or “not in agreement”. If this classification had not yet been made by the authors of the  
14  
15 171 original article, it was made based on the possible answer options, with “(strongly) agree”, “to  
16  
17 172 a reasonable/large extent” and “yes” indicating agreement, and “neither disagree or agree”,  
18  
19 173 “don’t know”, “neutral”, “a little bit/not at all”, “(strongly) disagree”, and “no” indicating not  
20  
21 174 in agreement. Next, the factor was classified as barrier or facilitator depending on the  
22  
23 175 formulation of the question and which of the two groups (“in agreement” versus “not in  
24  
25 176 agreement”) comprised  $\geq 50\%$  of the participants. In case of open-ended questions, all  
26  
27 177 mentioned factors were extracted. Regarding qualitative data, if the authors of the original  
28  
29 178 study did not explicitly identify a factor as barrier or facilitator, the description in the text or  
30  
31 179 the participants’ quotes were used to classify the factor as barrier (i.e.  
32  
33 180 impeding/negative/problem/lack), facilitator (i.e. facilitating/positive/solution/need), or  
34  
35 181 unclear (i.e. insufficient information). In addition, all unclear factors were re-discussed with a  
36  
37 182 third researcher (IvdAS) to assess whether these factors could nevertheless be classified as  
38  
39 183 barrier or facilitator. At the end of the second stage, final data extraction based on the above  
40  
41 184 criteria was performed by one researcher (SB), who also checked the consistency of the entire  
42  
43 185 data extraction process.  
44  
45  
46  
47  
48  
49  
50

186

### 187 ***Data synthesis and analysis***

188 A narrative synthesis of the data was undertaken, based on the TICD checklist developed by  
189 Flottorp et al.<sup>18</sup>. This checklist aims to assist in identifying key determinants of professional

1  
2  
3 190 practice, defined as factors that might prevent or enable healthcare improvements, and is  
4  
5 191 intended for use in research on implementation and quality improvement in healthcare. It  
6  
7  
8 192 consists of seven domains: (1) guideline factors; (2) individual health professional factors; (3)  
9  
10 193 patient factors; (4) professional interactions; (5) incentives and resources; (6) capacity for  
11  
12 194 organizational change; and (7) social, political, and legal factors. The authors of the current  
13  
14  
15 195 study have previously used the TICD checklist in the analysis of focus group data on the same  
16  
17 196 topic, revealing two additional domains: (8) patient and HCP interactions; and (9) disease  
18  
19 197 factors (data not yet published). One researcher (SB) assigned all extracted factors to one of  
20  
21 198 these nine domains and then summarized the factors within different categories and  
22  
23 199 subcategories per domain. The resulting classification of factors and corresponding  
24  
25 200 conclusions were subsequently discussed among the research team (SB/MS/IvdAS).  
26  
27  
28 201

### 202 *Patient and public involvement*

203 Patients or the public were not involved in this study as the study aim did not concern patients  
204 but HCPs.  
205

## 206 **Results**

### 208 *Study selection*

209 A flowchart of the study selection process is presented in Figure 1. A total of 8338 articles  
210 were retrieved. After removal of duplicates and exclusion of articles based on title or abstract,  
211 93 potentially relevant articles remained for full-text screening. Ultimately, 36 articles were  
212 included in the qualitative synthesis<sup>26-61</sup>.  
213

214 **[Figure 1. Flowchart of the study selection process]**

215

**216 *Study characteristics***

217 General characteristics of the included studies are presented in Table 1. The majority of  
218 studies were conducted in Australia (36%), the Netherlands (19%), the United Kingdom  
219 (19%) and Canada (11%). Qualitative data were extracted in 26 studies (72%), quantitative  
220 data in 7 studies (19%), and both qualitative and quantitative data in the remaining 3 studies  
221 (8%). Individual interviews were most commonly used as qualitative data collection method,  
222 while the quantitative studies were all based on cross-sectional surveys. Most studies included  
223 physiotherapists or general practitioners (or physicians) as study population. Other  
224 participants were dieticians, exercise professionals, a nurse practitioner, an occupational  
225 therapist, orthopedic surgeons, practice nurses, program instructors, rheumatologists,  
226 telephone coaches, and triaging clinicians.

227

228 [Table 1 near here]

229

**230 *Quality assessment***

231 Findings of the quality assessment of the included studies based on the MMAT are shown in  
232 Supplemental File 2. Regarding the qualitative data assessments, only one study had the  
233 maximum of five positive ratings. Seven studies had a negative rating for the item on  
234 substantiating the interpretation of results, as no or a limited number of participant quotes  
235 were presented. In addition, many unknown ratings were given due to a lack of information  
236 about the applied qualitative approach and/or data analysis methods and their rationale.  
237 Regarding the quantitative data assessments, most studies had a negative or unknown rating  
238 for the risk of non-response bias due to low response rates or a lack of information about the  
239 response rate and/or reasons for non-response. In addition, the item on representativeness of

1  
2  
3 240 the sample was often given an unknown rating because insufficient information about the  
4  
5 241 sample and/or non-responders was presented. Finally, all three mixed-methods studies had a  
6  
7 242 negative rating since the qualitative and quantitative components did not adhere to their  
8  
9 243 specific quality criteria. For the other four mixed-methods criteria, only one of these three  
10  
11 244 studies obtained positive ratings.  
12  
13  
14  
15 245

### 16 246 *Synthesis of results*

17  
18  
19 247 A total of 809 factors were extracted from the 36 included articles. Table 2 presents the  
20  
21 248 distribution of factors from the individual studies across the aforementioned nine domains,  
22  
23 249 which were largely based on the TICD checklist. The highest number of factors was assigned  
24  
25 250 to intervention factors (n=315), followed by individual HCP factors (n=144), and patient  
26  
27 251 factors (n=137). The lowest number of factors was assigned to capacity for organizational  
28  
29 252 change (n=7), followed by social, political, and legal factors (n=9), and patient and HCP  
30  
31 253 interactions (n=19). In Table 3 the content of the nine domains is further explained by  
32  
33 254 presenting an overview of the created categories and subcategories of factors that potentially  
34  
35 255 influence the implementation of LIs by HCPs within each domain. In addition, each domain is  
36  
37 256 briefly discussed below. A full overview of all extracted factors can be found in Supplemental  
38  
39 257 File 3 (presented per domain) and Supplemental File 4 (presented per article).  
40  
41  
42  
43  
44  
45 258

46 259 [Table 2 near here]

47 260 [Table 3 near here]

48  
49  
50  
51 261

#### 52 262 *Domain 1: Intervention factors*

53  
54 263 This domain consists of factors related to the outcomes, design and accessibility of LIs.  
55  
56 264 Regarding outcomes, perceptions that LIs have no or even negative effects were identified as  
57  
58  
59  
60

1  
2  
3 265 barriers. By contrast, other HCPs reported that LIs have positive effects on multiple levels and  
4  
5 266 are safe to implement. Regarding design, barriers and facilitators were identified for the  
6  
7  
8 267 content or structure of LIs, the effort required for patients participating in LIs, and HCPs  
9  
10 268 delivering LIs. The inability and ability to provide personalized treatment within LIs were  
11  
12 269 identified as barrier and facilitator, respectively. Regarding accessibility, barriers and  
13  
14 270 facilitators were found in the field of availability, associated costs, feasibility and  
15  
16  
17 271 sustainability, and convenience for patients. A separate category was created for factors  
18  
19 272 specific to delivering LIs via telehealth, consisting of factors related to effectiveness, safety,  
20  
21 273 feasibility for HCPs and patients, and the interaction between HCPs and patients.  
22  
23  
24 274

#### 25 26 275 *Domain 2: Individual HCP factors*

27  
28 276 Within this domain, three categories related to individual primary and secondary HCPs were  
29  
30 277 established: expertise, attitude, and role. A lack of knowledge and skills, a negative attitude  
31  
32 278 toward LIs or guidelines/protocols, and “negative” perceptions about the HCP’s own role in  
33  
34 279 the implementation of LIs (e.g. no/limited role) were found to be barriers. Adequate  
35  
36 280 knowledge and skills, a positive attitude toward LIs or guidelines/protocols, and “positive”  
37  
38 281 perceptions about the HCP’s own role (e.g. active role in the prescription or follow-up of LIs)  
39  
40 282 were identified as facilitators.  
41  
42  
43  
44 283

#### 45 46 47 284 *Domain 3: Patient factors*

48  
49 285 This domain includes factors related to patients with hip and/or knee OA as perceived by  
50  
51 286 HCPs. The first category within this domain is health status, consisting of the influence of OA  
52  
53 287 severity, potential comorbidities, and other patient characteristics. The second category is  
54  
55 288 treatment expectations and preferences, in which the perception that patients are not open to  
56  
57 289 LIs was mainly seen as barrier. The third category concerns active participation, which refers  
58  
59  
60

1  
2  
3 290 to degree of patient adherence or engagement and its influence on the effectiveness of LIs.  
4

5 291 The fourth and last category within this domain is capabilities, referring to the capacity and  
6

7 292 possibilities of patients to change their lifestyle, which might depend on their level of health  
8

9 293 literacy, financial resources, social support, and other responsibilities.  
10

11  
12 294

13  
14 295 *Domain 4: Professional interactions*

15  
16 296 Factors related to interactions between primary and secondary HCPs are included in this  
17

18 297 domain, divided into two categories: collaboration, and communication and referral.  
19

20 298 Regarding collaboration, non-optimal interdisciplinary collaboration or healthcare provision  
21

22 299 and no access to other HCPs were identified as barriers, while good collaboration with and  
23

24 300 adequate access to other HCPs were found to be facilitators. With regard to communication  
25

26 301 and referral, both the quantity (i.e. amount of communication) and quality (i.e. procedures  
27

28 302 used for communication and referral) were established as influencing factors.  
29

30  
31  
32  
33 303

34  
35 304 *Domain 5: Incentives and resources*

36  
37 305 This domain consists of factors related to the availability of incentives and resources for  
38

39 306 primary and secondary HCPs. First, the amount of time was identified as influencing factor,  
40

41 307 including both time for patient consultations and other activities/demands. In addition,  
42

43 308 barriers and facilitators were found related to financial resources and information resources.  
44

45 309 Lastly, the influence of facilities such as information technology or a health center was  
46

47 310 reported.  
48

49  
50  
51 311

52  
53 312 *Domain 6: Capacity for organizational change*

54 313 This domain includes factors related to the organization where primary and secondary HCPs  
55

56 314 work, both in the narrow sense (i.e. specific healthcare institution) and the broad sense (i.e.  
57  
58  
59  
60



1  
2  
3 315 general professional group). Two categories were identified including only facilitators:  
4  
5 316 professional paradigm and monitoring. The third category consists of solely one barrier,  
6  
7 317 namely lack of support from the management of the organization.  
8  
9

10 318

11  
12 319 *Domain 7: Social, political, and legal factors*

13  
14 320 Within this domain, which includes factors related to the social, political, and legal context,  
15  
16 321 one category was found: the healthcare system. Health insurance could be perceived as both  
17  
18 322 barrier and facilitator, depending on the associated possibilities for reimbursement and access  
19  
20 323 to services. Subsidies provided by the government were identified as facilitator.  
21  
22  
23

24 324

25  
26 325 *Domain 8: Patient and HCP interactions*

27  
28 326 Two categories were established in this domain of interactions between patients with hip  
29  
30 327 and/or knee OA and primary and secondary HCPs. First, therapeutic alliance refers to the  
31  
32 328 potential negative influence of implementing LIs to the relationship between patients and  
33  
34 329 HCPs as barrier, and to the importance of communication and having a good relationship as  
35  
36 330 facilitator. Second, lifestyle as conversation topic includes both barriers and facilitators in  
37  
38 331 relation to discussing weight management.  
39  
40  
41

42 332

43  
44 333 *Domain 9: Disease factors*

45  
46 334 This final domain consists of factors related to the disease of OA, grouped in a category  
47  
48 335 named image. Barriers within this category were perceptions that OA has a low priority and  
49  
50 336 that it is an untreatable and local condition, often described as “wear and tear”. An optimistic  
51  
52 337 attitude toward the prognosis of OA and the conservative treatment options was identified as  
53  
54 338 facilitator.  
55  
56  
57

58 339

## 340 Discussion

341  
342 The aim of this review was to provide an overview of barriers and facilitators that primary  
343 and secondary HCPs perceive for implementing LIs in patients with hip and/or knee OA. By  
344 linking the identified factors to a framework that was largely based on the TICD checklist<sup>18</sup>, a  
345 comprehensive overview of influencing factors was created that could serve as a basis for  
346 improving the implementation of LIs within primary and secondary OA care. The variety of  
347 domains within this framework shows that multiple levels (i.e. both the level of the individual  
348 HCP and several environmental levels) should be considered in order to achieve this.

349  
350 A relatively large number of studies were included, a majority of which was published in  
351 recent years. From these 36 studies, a total of 809 influencing factors were extracted.  
352 Although all nine domains were covered, the total number of factors identified within each  
353 domain differed greatly, ranging from 7 (*capacity for organizational change*) to 315  
354 (*intervention factors*). In addition to the domain of intervention factors, most factors were  
355 assigned to the domains of individual HCP factors and patient factors. However, the fact that  
356 we found the highest number of factors within these domains does not necessarily mean that  
357 these are the most important or relevant domains. It could also be an indication that studies to  
358 date have mainly focused on these domains, and that the other domains are still underexposed  
359 in the available literature. The quality assessment of the included studies showed many  
360 unknown ratings due to a lack of information about, for example, the applied methods and  
361 their rationale. This finding does not have to mean that the studies are of low quality, but it  
362 does emphasize the importance of accurate and complete reporting of research using design-  
363 specific reporting guidelines.

364

1  
2  
3 365 Our results reflect those of a previous systematic review conducted by Egerton et al.<sup>15</sup>, in  
4  
5 366 which the authors synthesized qualitative evidence only on primary care clinicians' views on  
6  
7 367 providing recommended management of OA up to August 2016. In addition to exercise and  
8  
9  
10 368 weight loss, recommended management included education, self-management support, and  
11  
12 369 medication. The authors identified four barriers as main themes: (1) "OA is not that serious";  
13  
14 370 (2) "clinicians are, or perceive they are, underprepared"; (3) "personal beliefs at odds with  
15  
16 371 providing recommended practice"; and (4) "dissonant patient expectations". A few system-  
17  
18 372 related factors (e.g. time, payment system) were mentioned, but these were not found to be  
19  
20 373 themes across multiple studies. In the current review, on the other hand, factors related to  
21  
22 374 interdisciplinary collaboration and the organizational and societal context were in fact  
23  
24 375 identified. Although these domains were relatively small in terms of number of factors, the  
25  
26 376 current review shows that these factors can also influence the implementation of LIs and thus  
27  
28 377 offers an even broader perspective on the implementation status of LIs within OA care.  
29  
30  
31  
32

33 378  
34  
35 379 In addition to summarizing the existing literature on barriers and facilitators for implementing  
36  
37 380 LIs, this review aimed to identify potential gaps in literature on the participation of HCPs.  
38  
39 381 Although we aimed to include perceptions of various primary and secondary HCPs, the  
40  
41 382 results show that studies to date have mainly focused on the views of physiotherapists and  
42  
43 383 general practitioners. These primary HCPs may well be the first point of contact for patients  
44  
45 384 within the care pathway, yet we recommend that other relevant disciplines – like dieticians,  
46  
47 385 lifestyle counselors, practice nurses, and orthopedic clinicians – be more involved in follow-  
48  
49 386 up research, allowing for a more complete understanding of the patient journey in OA care.  
50  
51  
52  
53

54 387  
55  
56 388 The resulting overview of barriers and facilitators can be used to improve the implementation  
57  
58 389 of LIs in daily practice. This overview presents factors that are relevant for individual HCPs,  
59  
60

1  
2  
3 390 as well as for policymakers, who can facilitate the organizational and societal context in  
4  
5 391 which primary and secondary HCPs work. When developing implementation strategies,  
6  
7 392 possible interactions between the various domains should also be considered. For instance,  
8  
9 393 more time (*domain 5*) can be used in various ways by HCPs: for their own education (*domain*  
10  
11 394 *2*), provision of information to patients (*domain 3*), or interdisciplinary consultation (*domain*  
12  
13 395 *4*). Another example is that societal changes in health insurance or payment structures  
14  
15 396 (*domain 7*) can lead to increased accessibility of LIs (*domain 1*), and that limited financial  
16  
17 397 resources might be less of an obstacle for patients (*domain 3*). Hence changes related to the  
18  
19 398 established factors can have positive effects on multiple levels.  
20  
21  
22  
23  
24 399

25  
26 400 Within the domain of intervention factors, a separate category was created for factors specific  
27  
28 401 to delivering LIs via telehealth. Attention for this modality of healthcare provision has been  
29  
30 402 growing for some time<sup>62</sup>. In addition, during the course of the current review the COVID-19  
31  
32 403 pandemic emerged, which meant that many HCPs actually had to use telehealth in their daily  
33  
34 404 practice<sup>63</sup>. Although telehealth was not a specific focus of this review, it could be interesting  
35  
36 405 to further investigate the experiences with telehealth and its value for long-term counseling of  
37  
38 406 patients with hip and/or knee OA on behavioral change<sup>64</sup>.  
39  
40  
41  
42 407

43  
44 408 To the best of our knowledge, this is the first review to focus specifically on the  
45  
46 409 implementation of LIs as conservative treatment for hip and/or knee OA while taking into  
47  
48 410 account the perceptions of both primary and secondary HCPs. Both qualitative and  
49  
50 411 quantitative data were included, providing broad insight into the topic. All included studies  
51  
52 412 were conducted in North America, Europe and Oceania. Given that the majority of these  
53  
54 413 studies were conducted quite recently, our results are expected to be representative of the  
55  
56 414 current situation in these continents.  
57  
58  
59  
60

1  
2  
3 415  
4  
5 416 There are also a few limitations to acknowledge. First, “implementing LIs” was defined very  
6  
7 417 broadly and can be seen as an umbrella term, ranging from mentioning a healthy lifestyle to  
8  
9 418 running specific lifestyle programs. Consequently, the identified barriers and facilitators may  
10  
11 419 not fit with every single way of implementing LIs, but may rather provide insight into the full  
12  
13 420 spectrum of influencing factors. Although data synthesis was not performed separately for  
14  
15 421 physical activity and weight management, the created overview gives us the overall  
16  
17 422 impression that barriers and facilitators related to these two lifestyle components are quite  
18  
19 423 similar. One barrier that seems to be unique to weight management is the perception of it  
20  
21 424 being a difficult or sensitive subject to discuss. Regarding physical activity, the perception  
22  
23 425 that it is unsafe or has negative effects seems to be a unique barrier. Second, although data  
24  
25 426 extraction and quality assessment were performed by two researchers independently, data  
26  
27 427 analysis was performed primarily by one researcher. By discussing the resulting classification  
28  
29 428 of factors and any doubts during the process with members of the research team, we aimed to  
30  
31 429 increase the reliability of our findings. Lastly, as we did not search grey literature there is a  
32  
33 430 slight chance that relevant studies may have been missed.  
34  
35  
36  
37  
38  
39  
40  
41

42 432 The comprehensive overview of barriers and facilitators for implementing LIs in patients with  
43  
44 433 hip and/or knee OA by HCPs resulting from this review can serve as a basis for further  
45  
46 434 research and the development of implementation strategies that focus on both the individual  
47  
48 435 and the environmental context of HCPs. However, what the relative importance of the  
49  
50 436 identified factors is and whether differences exist between the various types of primary and  
51  
52 437 secondary HCPs with respect to these factors are not known yet. Further research is required  
53  
54 438 to provide more insight into this relative importance and therewith the most relevant targets  
55  
56 439 for change in daily practice.  
57  
58  
59  
60

1  
2  
3 4404  
5 441 *Conclusion*

6  
7 442 This review has shown that multiple factors influence whether or not HCPs implement LIs  
8  
9 443 when treating patients with hip and/or knee OA. Data analysis has resulted in a  
10  
11 444 comprehensive overview of influencing factors, where barriers and facilitators have been  
12  
13 445 subdivided into nine domains, both at an individual and at several environmental levels. The  
14  
15 446 review contributes to existing knowledge about the implementation of LIs by identifying  
16  
17 447 multiple factors related to the intervention, interdisciplinary collaboration, and the  
18  
19 448 organizational and societal context. The broad inventory created in this review can be a first  
20  
21 449 step toward an improved implementation of LIs by HCPs in OA care. Future research in this  
22  
23 450 area should focus on determining the relative importance of the identified factors involving all  
24  
25 451 relevant disciplines of primary and secondary HCPs.  
26  
27  
28  
29

30 452

31 453 **Acknowledgements**

32  
33 454 The authors would like to thank Truus van Ittersum for her advice on search strategies and  
34  
35 455 Annemarie Jenks for her contribution to the study selection process.  
36  
37  
38  
39

40 456

41 457 **Author contributions**

42  
43 458 Conception and design: SB, RD, LvdW, MS, IvdAS. Collection and assembly of data: SB,  
44  
45 459 JvB. Analysis and interpretation of the data: SB, MS, IvdAS. Drafting of the article: SB.  
46  
47 460 Critical revision of the article for important intellectual content: SB, JvB, RD, LvdW, MS,  
48  
49 461 IvdAS. Final approval of the article: SB, JvB, RD, LvdW, MS, IvdAS. Obtaining of funding:  
50  
51 462 SB, RD, LvdW, MS, IvdAS.  
52  
53  
54  
55

56 463

57 464 **Role of the funding source**

1  
2  
3 465 This study is supported by a scholarship from the University of Groningen/University  
4  
5 466 Medical Center Groningen (grant/award number: not applicable). The funders played no role  
6  
7 467 in the study design, collection, analysis and interpretation of data, writing of the manuscript,  
8  
9 468 or the decision to submit the manuscript for publication.  
10  
11

12 469

### 14 470 **Conflict of interest**

16 471 The authors report no potential conflicts of interest.  
17  
18

19 472

### 21 473 **Data sharing statement**

23 474 Data sharing is not applicable to this article as no new data were created or analyzed in this  
24  
25 475 study.  
26  
27

28 476

### 30 477 **References**

32 478

- 35 479 1. Koninklijk Nederlands Genootschap voor Fysiotherapie (KNGF). KNGF-richtlijn  
36  
37 480 Artrose heup-knie. Conservatieve, pre- en postoperatieve behandeling [Internet]. 2018  
38  
39 481 [cited 2020 Aug 25]. Available from:  
40  
41 482 <https://www.kngf.nl/kennisplatform/richtlijnen/artrose-heup-knie>.  
42  
43 483 2. Nederlands Huisartsen Genootschap (NHG). NHG-Standaard Niet-traumatische  
44  
45 484 knieklachten [Internet]. 2016 [cited 2020 Aug 25]. Available from:  
46  
47 485 <https://www.nhg.org/standaarden/samenvatting/niet-traumatische-knieklachten>.  
48  
49 486 3. Nederlandse Orthopaedische Vereniging (NOV). Conservatieve behandeling van  
50  
51 487 artrose in heup of knie [Internet]. 2018 [cited 2020 Aug 25]. Available from:  
52  
53 488 [https://richtlijndatabase.nl/richtlijn/artrose\\_in\\_heup\\_of\\_knie/startpagina\\_-\\_heup-](https://richtlijndatabase.nl/richtlijn/artrose_in_heup_of_knie/startpagina_-_heup-)  
54  
55 489 [\\_of\\_knieartrose.html](https://richtlijndatabase.nl/richtlijn/artrose_in_heup_of_knie/startpagina_-_heup-_of_knieartrose.html).  
56  
57  
58  
59  
60

- 1  
2  
3 490 4. Bannuru RR, Osani MC, Vaysbrot EE, Arden NK, Bennell K, Bierma-Zeinstra SMA,  
4  
5 491 et al. OARSI guidelines for the non-surgical management of knee, hip, and  
6  
7 492 polyarticular osteoarthritis. *Osteoarthr Cartilage* 2019; 27: 1578-89.
- 8  
9  
10 493 5. Fernandes L, Hagen KB, Bijlsma JWJ, Andreassen O, Christensen P, Conaghan PG, et  
11  
12 494 al. EULAR recommendations for the non-pharmacological core management of hip  
13  
14 495 and knee osteoarthritis. *Ann Rheum Dis* 2013; 72: 1125-35.
- 15  
16  
17 496 6. Fransen M, McConnell S, Hernandez-Molina G, Reichenbach S. Exercise for  
18  
19 497 osteoarthritis of the hip. *Cochrane Database Syst Rev*. 2014(4):CD007912.  
20  
21 498 DOI:10.1002/14651858.CD007912.pub2.
- 22  
23  
24 499 7. Fransen M, McConnell S, Harmer AR, Van der Esch M, Simic M, Bennell KL.  
25  
26 500 Exercise for osteoarthritis of the knee: a Cochrane systematic review. *Br J Sports Med*  
27  
28 501 2015; 49: 1554-7.
- 29  
30  
31 502 8. Messier SP, Loeser RF, Miller GD, Morgan TM, Rejeski WJ, Sevick MA, et al.  
32  
33 503 Exercise and dietary weight loss in overweight and obese older adults with knee  
34  
35 504 osteoarthritis: the Arthritis, Diet, and Activity Promotion Trial. *Arthritis Rheum* 2004;  
36  
37 505 50: 1501-10.
- 38  
39  
40 506 9. Paans N, van den Akker-Scheek I, Dilling RG, Bos M, van der Meer K, Bulstra SK, et  
41  
42 507 al. Effect of exercise and weight loss in people who have hip osteoarthritis and are  
43  
44 508 overweight or obese: a prospective cohort study. *Phys Ther* 2013; 93: 137-46.
- 45  
46  
47 509 10. Svege I, Nordsletten L, Fernandes L, Risberg MA. Exercise therapy may postpone  
48  
49 510 total hip replacement surgery in patients with hip osteoarthritis: a long-term follow-up  
50  
51 511 of a randomised trial. *Ann Rheum Dis* 2015; 74: 164-9.
- 52  
53  
54 512 11. Snijders GF, den Broeder AA, van Riel PL, Straten VH, de Man FH, van den Hoogen  
55  
56 513 FH, et al. Evidence-based tailored conservative treatment of knee and hip  
57  
58 514 osteoarthritis: between knowing and doing. *Scand J Rheumatol* 2011; 40: 225-31.  
59  
60



- 1  
2  
3 515 12. Bennell KL, Dobson F, Hinman RS. Exercise in osteoarthritis: moving from  
4  
5 516 prescription to adherence. *Best Pract Res Clin Rheumatol* 2014; 28: 93-117.  
6  
7 517 13. Dobson F, Bennell KL, French SD, Nicolson PJ, Klaasman RN, Holden MA, et al.  
8  
9 518 Barriers and facilitators to exercise participation in people with hip and/or knee  
10  
11 519 osteoarthritis: synthesis of the literature using behavior change theory. *Am J Phys Med*  
12  
13 520 *Rehabil* 2016; 95: 372-89.  
14  
15 521 14. Kanavaki AM, Rushton A, Efstathiou N, Alrushud A, Klocke R, Abhishek A, et al.  
16  
17 522 Barriers and facilitators of physical activity in knee and hip osteoarthritis: a systematic  
18  
19 523 review of qualitative evidence. *BMJ Open*. 2017;7(12):e017042.  
20  
21 524 DOI:10.1136/bmjopen-2017-017042  
22  
23 525 15. Egerton T, Diamond LE, Buchbinder R, Bennell KL, Slade SC. A systematic review  
24  
25 526 and evidence synthesis of qualitative studies to identify primary care clinicians'  
26  
27 527 barriers and enablers to the management of osteoarthritis. *Osteoarthr Cartilage* 2017;  
28  
29 528 25: 625-38.  
30  
31 529 16. Landelijke Huisartsen Vereniging (LHV)/Nederlands Huisartsen Genootschap (NHG).  
32  
33 530 Toekomstvisie Huisartsenzorg 2022 [Internet]. 2012 [cited 2020 Dec 21]. Available  
34  
35 531 from: <https://www.nhg.org/toekomstvisie>.  
36  
37 532 17. Colquhoun HL, Levac D, O'Brien KK, Straus S, Tricco AC, Perrier L, et al. Scoping  
38  
39 533 reviews: time for clarity in definition, methods, and reporting. *J Clin Epidemiol* 2014;  
40  
41 534 67: 1291-4.  
42  
43 535 18. Flottorp SA, Oxman AD, Krause J, Musila NR, Wensing M, Godycki-Cwirko M, et  
44  
45 536 al. A checklist for identifying determinants of practice: a systematic review and  
46  
47 537 synthesis of frameworks and taxonomies of factors that prevent or enable  
48  
49 538 improvements in healthcare professional practice. *Implement Sci*. 2013;8:35.  
50  
51 539 DOI:10.1186/1748-5908-8-35  
52  
53  
54  
55  
56  
57  
58  
59  
60

- 1  
2  
3 540 19. Arksey H, O'Malley L. Scoping studies: towards a methodological framework. *Int J*  
4  
5 541 *Soc Res Method* 2005; 8: 19-32.
- 6  
7 542 20. Tricco AC, Lillie E, Zarin W, O'Brien KK, Colquhoun H, Levac D, et al. PRISMA  
8  
9 543 Extension for Scoping Reviews (PRISMA-ScR): Checklist and Explanation. *Ann*  
10  
11 544 *Intern Med* 2018; 169: 467-73.
- 12  
13 545 21. Peters MDJ, Godfrey CM, McInerney P, Baldini Soares C, Khalil H, Parker D. The  
14  
15 546 Joanna Briggs Institute Reviewers' Manual 2015: Methodology for JBI scoping  
16  
17 547 reviews. Adelaide: The Joanna Briggs Institute 2015.
- 18  
19 548 22. Pluye P, Gagnon M-P, Griffiths F, Johnson-Lafleur J. A scoring system for appraising  
20  
21 549 mixed methods research, and concomitantly appraising qualitative, quantitative and  
22  
23 550 mixed methods primary studies in Mixed Studies Reviews. *Int J Nurs Stud* 2009; 46:  
24  
25 551 529-46.
- 26  
27 552 23. Hong QN, Pluye P, Fàbregues S, Bartlett G, Boardman F, Cargo M, et al. Mixed  
28  
29 553 Methods Appraisal Tool (MMAT), version 2018. Registration of Copyright  
30  
31 554 (#1148552), Canadian Intellectual Property Office, Industry Canada 2018.
- 32  
33 555 24. Garne-Dalgaard A, Mann S, Bredahl TVG, Stochkendahl MJ. Implementation  
34  
35 556 strategies, and barriers and facilitators for implementation of physical activity at work:  
36  
37 557 a scoping review. *Chiropr Man Therap.* 2019;27. DOI:10.1186/s12998-019-0268-5
- 38  
39 558 25. Weatherson KA, Gainforth HL, Jung ME. A theoretical analysis of the barriers and  
40  
41 559 facilitators to the implementation of school-based physical activity policies in Canada:  
42  
43 560 a mixed methods scoping review. *Implementation Sci.* 2017;12. DOI:10.1186/s13012-  
44  
45 561 017-0570-3
- 46  
47 562 26. Allison K, Setchell J, Egerton T, Delany C, Bennell KL. In Theory, Yes; in Practice,  
48  
49 563 Uncertain: A Qualitative Study Exploring Physical Therapists' Attitudes Toward Their  
50  
51  
52  
53  
54  
55  
56  
57  
58  
59  
60

- 1  
2  
3 564 Roles in Weight Management for People With Knee Osteoarthritis. *Phys Ther* 2019;  
4  
5 565 99: 601-11.  
6  
7  
8 566 27. Bossen D, Kloek C, Snippe HW, Dekker J, de Bakker D, Veenhof C. A Blended  
9  
10 567 Intervention for Patients With Knee and Hip Osteoarthritis in the Physical Therapy  
11  
12 568 Practice: Development and a Pilot Study. *JMIR Res Protoc* 2016; 5: e32.  
13  
14 569 28. Christiansen MB, White DK, Christian J, Waugh E, Gakhal N, King L, et al. "It ...  
15  
16 570 doesn't always make it [to] the top of the list" Primary care physicians' experiences  
17  
18 571 with prescribing exercise for knee osteoarthritis. *Canadian Family Physician* 2020; 66:  
19  
20 572 e14-20.  
21  
22  
23 573 29. Davis AM, Kennedy D, Wong R, Robarts S, Skou ST, McGlasson R, et al. Cross-  
24  
25 574 cultural adaptation and implementation of Good Life with osteoarthritis in Denmark  
26  
27 575 (GLA:D™): group education and exercise for hip and knee osteoarthritis is feasible in  
28  
29 576 Canada. *Osteoarthritis Cartilage* 2018; 26: 211-9.  
30  
31  
32 577 30. de Rooij M, van der Leeden M, Avezaat E, Häkkinen A, Klaver R, Maas T, et al.  
33  
34 578 Development of comorbidity-adapted exercise protocols for patients with knee  
35  
36 579 osteoarthritis. *Clin Interv Aging* 2014; 9: 829-42.  
37  
38  
39 580 31. Egerton T, Nelligan R, Setchell J, Atkins L, Bennell KL. General practitioners'  
40  
41 581 perspectives on a proposed new model of service delivery for primary care  
42  
43 582 management of knee osteoarthritis: a qualitative study. *BMC Fam Pract* 2017; 18: 85.  
44  
45  
46 583 32. Egerton T, Nelligan RK, Setchell J, Atkins L, Bennell KL. General practitioners'  
47  
48 584 views on managing knee osteoarthritis: a thematic analysis of factors influencing  
49  
50 585 clinical practice guideline implementation in primary care. *BMC Rheumatol* 2018; 2:  
51  
52 586 30.  
53  
54  
55  
56  
57  
58  
59  
60

- 1  
2  
3 587 33. Hinman RS, Delany CM, Campbell PK, Gale J, Bennell KL. Physical Therapists,  
4  
5 588 Telephone Coaches, and Patients With Knee Osteoarthritis: Qualitative Study About  
6  
7 589 Working Together to Promote Exercise Adherence. *Phys Ther* 2016; 96: 479-93.  
8  
9  
10 590 34. Hinman RS, Nelligan RK, Bennell KL, Delany C. "Sounds a Bit Crazy, But It Was  
11  
12 591 Almost More Personal:" A Qualitative Study of Patient and Clinician Experiences of  
13  
14 592 Physical Therapist-Prescribed Exercise For Knee Osteoarthritis Via Skype. *Arthritis*  
15  
16 593 *Care Res (Hoboken)* 2017; 69: 1834-44.  
17  
18  
19 594 35. Knoop J, van der Leeden M, van der Esch M, de Rooij M, Peter WF, Bennell KL, et  
20  
21 595 al. Is a model of stratified exercise therapy by physical therapists in primary care  
22  
23 596 feasible in patients with knee osteoarthritis? : a mixed methods study. *Physiotherapy*  
24  
25 597 2020; 106: 101-10.  
26  
27  
28 598 36. Law RJ, Nafees S, Hiscock J, Wynne C, Williams NH. A lifestyle management  
29  
30 599 programme focused on exercise, diet and physiotherapy support for patients with hip  
31  
32 600 or knee osteoarthritis and a body mass index over 35: A qualitative study.  
33  
34 601 *Musculoskeletal Care* 2019; 17: 145-51.  
35  
36  
37 602 37. Lawford BJ, Delany C, Bennell KL, Hinman RS. "I Was Really Pleasantly Surprised":  
38  
39 603 Firsthand Experience and Shifts in Physical Therapist Perceptions of Telephone-  
40  
41 604 Delivered Exercise Therapy for Knee Osteoarthritis-A Qualitative Study. *Arthritis*  
42  
43 605 *Care Res (Hoboken)* 2019; 71: 545-57.  
44  
45  
46 606 38. Lawford BJ, Bennell KL, Allison K, Schwartz S, Hinman RS. Challenges with  
47  
48 607 strengthening exercises for people with knee osteoarthritis and comorbid obesity: a  
49  
50 608 qualitative study with patients and physiotherapists. *Arthritis Care Res (Hoboken)*.  
51  
52 609 2020. DOI:10.1002/acr.24439  
53  
54  
55 610 39. Lawford BJ, Bennell KL, Jones SE, Keating C, Brown C, Hinman RS. "It's the single  
56  
57 611 best thing I've done in the last 10 years": a qualitative study exploring patient and  
58  
59  
60

- 1  
2  
3 612 dietitian experiences with, and perceptions of, a multi-component dietary weight loss  
4  
5 613 program for knee osteoarthritis. *Osteoarthritis Cartilage* 2021; 29: 507-17.  
6  
7  
8 614 40. MacKay C, Hawker GA, Jaglal SB. Qualitative study exploring the factors influencing  
9  
10 615 physical therapy management of early knee osteoarthritis in Canada. *BMJ Open* 2018;  
11  
12 616 8: e023457.  
13  
14 617 41. MacKay C, Hawker GA, Jaglal SB. How Do Physical Therapists Approach  
15  
16 618 Management of People With Early Knee Osteoarthritis? A Qualitative Study. *Phys*  
17  
18 619 *Ther* 2020; 100: 295-306.  
19  
20 620 42. Mann C, Gooberman-Hill R. Health care provision for osteoarthritis: concordance  
21  
22 621 between what patients would like and what health professionals think they should  
23  
24 622 have. *Arthritis Care Res (Hoboken)* 2011; 63: 963-72.  
25  
26 623 43. Miller KA, Osman F, Baier Manwell L. Patient and physician perceptions of knee and  
27  
28 624 hip osteoarthritis care: A qualitative study. *Int J Clin Pract* 2020; 74: e13627.  
29  
30 625 44. Nielsen M, Keefe FJ, Bennell K, Jull GA. Physical therapist-delivered cognitive-  
31  
32 626 behavioral therapy: a qualitative study of physical therapists' perceptions and  
33  
34 627 experiences. *Phys Ther* 2014; 94: 197-209.  
35  
36 628 45. Okwera A, May S. Views of general practitioners toward physiotherapy management  
37  
38 629 of osteoarthritis-a qualitative study. *Physiother Theory Pract* 2019; 35: 940-6.  
39  
40 630 46. Poitras S, Rossignol M, Avouac J, Avouac B, Cedraschi C, Nordin M, et al.  
41  
42 631 Management recommendations for knee osteoarthritis: how usable are they? *Joint*  
43  
44 632 *Bone Spine* 2010; 77: 458-65.  
45  
46 633 47. Rosemann T, Wensing M, Joest K, Backenstrass M, Mahler C, Szecsenyi J. Problems  
47  
48 634 and needs for improving primary care of osteoarthritis patients: the views of patients,  
49  
50 635 general practitioners and practice nurses. *BMC Musculoskel Dis* 2006; 7: 48.  
51  
52  
53  
54  
55  
56  
57  
58  
59  
60

- 1  
2  
3 636 48. Selten EMH, Vriezekolk JE, Nijhof MW, Schers HJ, van der Meulen-Dilling RG, van  
4  
5 637 der Laan WH, et al. Barriers Impeding the Use of Non-pharmacological, Non-surgical  
6  
7 638 Care in Hip and Knee Osteoarthritis: The Views of General Practitioners, Physical  
8  
9 639 Therapists, and Medical Specialists. *J Clin Rheumatol* 2017; 23: 405-10.
- 10  
11  
12 640 49. Tang CY, Pile R, Croft A, Watson NJ. Exploring Physical Therapist Adherence to  
13  
14 641 Clinical Guidelines When Treating Patients With Knee Osteoarthritis in Australia: A  
15  
16 642 Mixed Methods Study. *Phys Ther* 2020; 100: 1084-93.
- 17  
18  
19 643 50. Teo PL, Bennell KL, Lawford BJ, Egerton T, Dziedzic KS, Hinman RS.  
20  
21 644 Physiotherapists may improve management of knee osteoarthritis through greater  
22  
23 645 psychosocial focus, being proactive with advice, and offering longer-term reviews: a  
24  
25 646 qualitative study. *J Physiother* 2020; 66: 256-65.
- 26  
27  
28 647 51. Wallis JA, Ackerman IN, Brusco NK, Kemp JL, Sherwood J, Young K, et al. Barriers  
29  
30 648 and enablers to uptake of a contemporary guideline-based management program for  
31  
32 649 hip and knee osteoarthritis: A qualitative study. *Osteoarthritis and Cartilage Open*  
33  
34 650 2020; 2.
- 35  
36  
37 651 52. Cottrell E, Roddy E, Rathod T, Porcheret M, Foster NE. What influences general  
38  
39 652 practitioners' use of exercise for patients with chronic knee pain? Results from a  
40  
41 653 national survey. *BMC Fam Pract* 2016; 17: 172.
- 42  
43  
44 654 53. Duarte N, Hughes SL, Paúl C. Cultural adaptation and specifics of the Fit & Strong!  
45  
46 655 program in Portugal. *Transl Behav Med* 2019; 9: 67-75.
- 47  
48  
49 656 54. Hill DS, Freudmann M, Sergeant JC, Board T. Management of symptomatic knee  
50  
51 657 osteoarthritis in obesity: a survey of orthopaedic surgeons' opinions and practice. *Eur J*  
52  
53 658 *Orthop Surg Traumatol* 2018; 28: 967-74.
- 54  
55  
56  
57  
58  
59  
60

- 1  
2  
3 659 55. Hill D, Boyd A, Board T. Management of symptomatic knee osteoarthritis in obesity:  
4  
5 660 a survey of general practitioners' opinions and practice. *Eur J Orthop Surg Traumatol*  
6  
7 661 2018; 28: 1183-9.  
8  
9  
10 662 56. Hofstede SN, Marang-van de Mheen PJ, Vliet Vlieland TP, van den Ende CH,  
11  
12 663 Nelissen RG, van Bodegom-Vos L. Barriers and Facilitators Associated with Non-  
13  
14 664 Surgical Treatment Use for Osteoarthritis Patients in Orthopaedic Practice. *PLoS One*  
15  
16 665 2016; 11: e0147406.  
17  
18  
19 666 57. Lawford BJ, Bennell KL, Kasza J, Hinman RS. Physical Therapists' Perceptions of  
20  
21 667 Telephone- and Internet Video-Mediated Service Models for Exercise Management of  
22  
23 668 People With Osteoarthritis. *Arthritis Care Res (Hoboken)* 2018; 70: 398-408.  
24  
25  
26 669 58. Reid DA, Potts G, Burnett M, Konings B. Physiotherapy management of knee and hip  
27  
28 670 osteoarthritis: a survey of patient and medical practitioners' expectations, experiences  
29  
30 671 and perceptions of effectiveness of treatment. *New Zeal J Physiother* 2014; 42: 118-  
31  
32 672 25.  
33  
34  
35 673 59. de Rooij M, van der Leeden M, van der Esch M, Lems WF, Meesters JJJ, Peter WF,  
36  
37 674 et al. Evaluation of an educational course for primary care physiotherapists on  
38  
39 675 comorbidity-adapted exercise therapy in knee osteoarthritis: an observational study.  
40  
41 676 *Musculoskeletal Care* 2020; 18: 122-33.  
42  
43  
44 677 60. Holden MA, Nicholls EE, Young J, Hay EM, Foster NE. UK-based physical  
45  
46 678 therapists' attitudes and beliefs regarding exercise and knee osteoarthritis: findings  
47  
48 679 from a mixed-methods study. *Arthritis Rheum* 2009; 61: 1511-21.  
49  
50  
51 680 61. Kloek CJJ, Bossen D, de Vries HJ, de Bakker DH, Veenhof C, Dekker J.  
52  
53 681 Physiotherapists' experiences with a blended osteoarthritis intervention: a mixed  
54  
55 682 methods study. *Physiother Theory Pract* 2020; 36: 572-9.  
56  
57  
58  
59  
60

- 1  
2  
3 683 62. Slater H, Dear BF, Merolli MA, Li LC, Briggs AM. Use of eHealth technologies to  
4  
5 684 enable the implementation of musculoskeletal Models of Care: Evidence and practice.  
6  
7 685 Best Pract Res Clin Rheumatol 2016; 30: 483-502.  
8  
9  
10 686 63. Loeb AE, Rao SS, Ficke JR, Morris CD, Riley LH, Levin AS. Departmental  
11  
12 687 Experience and Lessons Learned With Accelerated Introduction of Telemedicine  
13  
14 688 During the COVID-19 Crisis. J Am Acad Orthop Surg 2020; 28: e469-76.  
15  
16  
17 689 64. Piga M, Cangemi I, Mathieu A, Cauli A. Telemedicine for patients with rheumatic  
18  
19 690 diseases: Systematic review and proposal for research agenda. Semin Arthritis Rheum  
20  
21 691 2017; 47: 121-8.  
22  
23  
24  
25 692



693 **Table 1.** Overview of included studies<sup>a</sup>

| Reference                                 | Country and health setting                                                    | Study focus                                                                                                                                       | Type of data extracted | Data collection method                     | Data analysis method                         | Participants                                              |
|-------------------------------------------|-------------------------------------------------------------------------------|---------------------------------------------------------------------------------------------------------------------------------------------------|------------------------|--------------------------------------------|----------------------------------------------|-----------------------------------------------------------|
| Allison <sup>26</sup> (2019)              | Australia (private primary care and public hospital care or community health) | Attitudes and perceptions toward role in weight management (knee OA)                                                                              | Qualitative            | Individual interviews                      | Inductive thematic analysis                  | PT (n=13, 61% female, age range 27-61 years)              |
| Bossen <sup>27</sup> (2016)               | The Netherlands (private practice)                                            | Development and feasibility of the blended exercise therapy intervention “e-Exercise” (hip and/or knee OA)                                        | Qualitative            | 1) Focus group<br>2) Individual interviews | 1) Summarizing<br>2) Thematic trend analysis | 1) PT (n=7)<br>2) PT (n=5)                                |
| Christiansen <sup>28</sup> (2020)         | Canada (academic and community family health practice)                        | Experiences with and barriers to prescribing exercise (knee OA)                                                                                   | Qualitative            | Individual interviews                      | Constant comparison approach                 | Physician (n=11)                                          |
| Davis <sup>29</sup> (2018)                | Canada (single assessment center)                                             | Implementation of the “Good Life with osteoArthritis in Denmark (GLA:D™) Canada” program (hip and/or knee OA)                                     | Qualitative            | Individual interviews                      | Thematic content analysis                    | PT (n=3)                                                  |
| De Rooij <sup>30</sup> (2014)             | The Netherlands (rehabilitation center)                                       | Development of comorbidity-adapted exercise protocols (knee OA)                                                                                   | Qualitative            | Individual interviews                      | Analyzing notes                              | PT (n=3)                                                  |
| Egerton <sup>31</sup> (2017) <sup>b</sup> | Australia (primary care)                                                      | Perspectives on potential barriers and facilitators to engagement with a proposed model of service delivery for primary care management (knee OA) | Qualitative            | Individual interviews                      | Interpretive thematic analysis               | GP (n=11, 64% female, mean age 50.8 years (range: 34-67)) |
| Egerton <sup>32</sup> (2018) <sup>b</sup> | Australia (primary care)                                                      | Barriers and facilitators influencing clinical practice guideline implementation in                                                               | Qualitative            | Individual interviews                      | Interpretive thematic analysis               | GP (n=11, 64% female)                                     |

[30]

| primary care (knee OA)         |                                 |                                                                                                                                   |             |                                                 |                                                       |                                                                                                                                                         |
|--------------------------------|---------------------------------|-----------------------------------------------------------------------------------------------------------------------------------|-------------|-------------------------------------------------|-------------------------------------------------------|---------------------------------------------------------------------------------------------------------------------------------------------------------|
| Hinman <sup>33</sup><br>(2016) | Australia (private practice)    | Experiences of being involved in delivering an integrated program of PT-supervised exercise and telephone coaching (knee OA)      | Qualitative | Individual interviews                           | Thematic analysis informed by grounded theory         | PT (n=10, 50% female, mean age 43 years (SD: 13))<br><br>Telephone coach (n=4; 100% female, mean age 42 years (SD: 11))                                 |
| Hinman <sup>34</sup><br>(2017) | Australia (not specified)       | Experiences using Skype as a service delivery model for PT-prescribed exercise management (knee OA)                               | Qualitative | Individual interviews                           | Thematic and constant comparative analytical approach | PT (n=8, 50% female, mean age 39 years (SD: 9))                                                                                                         |
| Knoop <sup>35</sup><br>(2020)  | The Netherlands (primary care)  | Feasibility of a newly developed model of stratified exercise therapy in primary care (knee OA)                                   | Qualitative | 1) Individual interviews<br><br>2) Focus group  | Analyzed descriptively                                | 1) PT (n=9)<br><br>2) PT (n=14)                                                                                                                         |
| Law <sup>36</sup> (2019)       | United Kingdom (leisure center) | Experiences and views of referring and delivering professionals regarding the “Lifestyle Management Program” (hip and/or knee OA) | Qualitative | 1) Focus groups<br><br>2) Individual interviews | Framework analysis method                             | 1) Dietician (n=2)<br><br>Exercise professional (n=3)<br><br>PT (n=4)<br><br>Triaging clinician (n=1)<br><br>2) GP (n=3)<br><br>Total group: 46% female |

|                                                                                        |                                             |                                                 |                                                                                                                          |             |                       |                                               |                                                                                                                      |
|----------------------------------------------------------------------------------------|---------------------------------------------|-------------------------------------------------|--------------------------------------------------------------------------------------------------------------------------|-------------|-----------------------|-----------------------------------------------|----------------------------------------------------------------------------------------------------------------------|
| 1<br>2<br>3<br>4<br>5<br>6                                                             | Lawford <sup>37</sup><br>(2019)             | Australia (private and public practice)         | Pre- and post-intervention perceptions of telephone-delivered exercise therapy (knee OA)                                 | Qualitative | Individual interviews | Thematic analysis approach                    | PT (n=8, 50% female)                                                                                                 |
| 7<br>8<br>9<br>10<br>11                                                                | Lawford <sup>38</sup><br>(2020)             | Australia (private and public practice)         | Experiences and perceptions with prescribing a strengthening exercise program for people with comorbid obesity (knee OA) | Qualitative | Individual interviews | Inductive thematic approach                   | PT (n=7, 14% female)                                                                                                 |
| 12<br>13<br>14<br>15<br>16                                                             | Lawford <sup>39</sup><br>(2021)             | Australia (private and public practice)         | Experiences with a multi-component dietary weight loss program (knee OA)                                                 | Qualitative | Individual interviews | Thematic approach informed by grounded theory | Dietician (n=5, 100% female)                                                                                         |
| 17<br>18<br>19<br>20                                                                   | MacKay <sup>40</sup><br>(2018) <sup>c</sup> | Canada (community-based and outpatient setting) | Factors influencing physical therapy management (knee OA)                                                                | Qualitative | Individual interviews | Inductive thematic analysis                   | PT (n=33, 76% female)                                                                                                |
| 21<br>22<br>23<br>24                                                                   | MacKay <sup>41</sup><br>(2020) <sup>c</sup> | Canada (community-based and outpatient setting) | Perceptions related to physical therapy management (knee OA)                                                             | Qualitative | Individual interviews | Inductive thematic analysis                   | PT (n=33, 76% female)                                                                                                |
| 25<br>26<br>27<br>28<br>29<br>30<br>31<br>32<br>33<br>34<br>35<br>36<br>37<br>38<br>39 | Mann <sup>42</sup> (2011)                   | United Kingdom (primary and secondary care)     | Perceptions of current service provision and possible service improvements (hip and/or knee OA)                          | Qualitative | Individual interviews | Framework method                              | GP (n=2)<br>Nurse practitioner (n=1)<br>Occupational therapist (n=1)<br>OS (n=2)<br>Practice nurse (n=3)<br>PT (n=2) |

|                               |                                                           |                                                                                                                                                                                    |             |                       |                                                                | RH (n=1)                                                                                                                                |
|-------------------------------|-----------------------------------------------------------|------------------------------------------------------------------------------------------------------------------------------------------------------------------------------------|-------------|-----------------------|----------------------------------------------------------------|-----------------------------------------------------------------------------------------------------------------------------------------|
| Miller <sup>43</sup> (2020)   | United States of America (large academic medical center)  | Barriers and facilitators to guideline-based treatment (hip and/or knee OA)                                                                                                        | Qualitative | Individual interviews | Conventional content analysis                                  | Physician (n=6, 50% female)                                                                                                             |
| Nielsen <sup>44</sup> (2014)  | Australia (not specified)                                 | Perspectives on and experiences with an intervention of exercise combined with cognitive behavioral therapy (Pain Coping Skills Training) and the implementation process (knee OA) | Qualitative | Individual interviews | Framework analysis                                             | PT (n=8, 88% female, age range 35-58 years)                                                                                             |
| Okwera <sup>45</sup> (2019)   | United Kingdom (general practice within NHS)              | Beliefs on physiotherapy management in primary care (hip and/or knee OA)                                                                                                           | Qualitative | Individual interviews | Framework analysis                                             | GP (n=8, 50% female, age range 31-60 years)                                                                                             |
| Poitras <sup>46</sup> (2010)  | France (general practice; work setting PTs not specified) | Barriers to use of conservative management recommendations (knee OA)                                                                                                               | Qualitative | Focus groups          | Thematic content analysis                                      | GP (n=7, 29% female, median age 53 years (range: 48-77))<br><br>PT (n=10, 40% female, median age 46.5 years (range: 24-69))             |
| Rosemann <sup>47</sup> (2006) | Germany (general practice)                                | Problems and needs for improving primary care (hip and/or knee OA)                                                                                                                 | Qualitative | Individual interviews | Description of coding process, but no specific method reported | GP (n=20, 20% female, mean age 43.5 years (range: 33-57))<br><br>Practice nurse (n=20, 100% female, mean age 41.3 years (range: 29-56)) |
| Selten <sup>48</sup> (2017)   | The Netherlands                                           | Views on non-pharmacological, non-                                                                                                                                                 | Qualitative | Individual            | Thematic analysis                                              | GP (n=5)                                                                                                                                |

|                               |                                                                                   |                                                                                                                                                                             |              |                       |                                    |                                                                                    |
|-------------------------------|-----------------------------------------------------------------------------------|-----------------------------------------------------------------------------------------------------------------------------------------------------------------------------|--------------|-----------------------|------------------------------------|------------------------------------------------------------------------------------|
|                               | (general practice; work setting PTs, OSs and RHs not specified)                   | surgical management (hip and/or knee OA)                                                                                                                                    |              | interviews            |                                    | OS (n=7)<br>PT (n=7)<br>RH (n=5)<br>Total group: 50% female, age range 24-64 years |
| Tang <sup>49</sup> (2020)     | Australia (large metropolitan public health service)                              | Application of clinical practice guidelines (knee OA)                                                                                                                       | Qualitative  | Individual interviews | Thematic analysis                  | PT (n=18)                                                                          |
| Teo <sup>50</sup> (2020)      | Australia (private practice and tertiary or non-tertiary hospitals)               | Experiences with delivering care (knee OA)                                                                                                                                  | Qualitative  | Individual interviews | Inductive thematic approach        | PT (n=22, 50% female, mean age 34 years (SD: 8, range: 24-54))                     |
| Wallis <sup>51</sup> (2020)   | Australia (general practice; OSs and RHs working in private and public hospitals) | Perceptions about management including barriers and enablers for referral to the “Good Life with osteoArthritis in Denmark (GLA:D®) Australia” program (hip and/or knee OA) | Qualitative  | Individual interviews | Inductive thematic analysis        | GP (n=5)<br>OS (n=6)<br>RH (n=4)<br>Total group: mean age 52 years (SD: 12)        |
| Cottrell <sup>52</sup> (2016) | United Kingdom (general practice)                                                 | Attitudes and beliefs regarding exercise (knee OA)                                                                                                                          | Quantitative | Survey (RR: 17%)      | Descriptive statistics (frequency) | GP (n=835, 51% female)                                                             |
| Duarte <sup>53</sup> (2019)   | Portugal (not specified)                                                          | Development and acceptability of the Portuguese version of the “Fit & Strong!” program (hip and/or knee OA)                                                                 | Quantitative | Survey (RR: 100%)     | Not reported                       | Program instructor (n=2)                                                           |
| Hill <sup>54</sup> (2018)     | United Kingdom                                                                    | Opinions and practices regarding the                                                                                                                                        | Quantitative | Survey (RR:           | Descriptive statistics             | OS (n=205)                                                                         |

|                               |                                                                |                                                                                                                                        |               |                                                  |                                                                        |                                                                                  |
|-------------------------------|----------------------------------------------------------------|----------------------------------------------------------------------------------------------------------------------------------------|---------------|--------------------------------------------------|------------------------------------------------------------------------|----------------------------------------------------------------------------------|
|                               | (specialist practice in knee surgery)                          | management of symptomatic OA in obesity (knee OA)                                                                                      |               | 52%)                                             | (frequency)                                                            |                                                                                  |
| Hill <sup>55</sup> (2018)     | United Kingdom (general practice)                              | Opinions and practices regarding the management of symptomatic OA in obesity (knee OA)                                                 | Quantitative  | Survey (RR: 75%)                                 | Descriptive statistics (frequency)                                     | GP (n=130)                                                                       |
| Hofstede <sup>56</sup> (2016) | The Netherlands (52% of OSs worked at a general hospital)      | Barriers and facilitators associated with prescription of different non-surgical treatments (hip and/or knee OA)                       | Quantitative  | Survey (RR: 36%)                                 | Descriptive statistics (frequency)                                     | OS (n=172, 9% female, mean age 48.4 years (SD: 8.6))                             |
| Lawford <sup>57</sup> (2018)  | Australia (private and public practice)                        | Perceptions of remotely-delivered service models for exercise management (hip and/or knee OA)                                          | Quantitative  | Survey (RR: unknown)                             | Descriptive statistics (frequency and level of agreement)              | PT (n=217, 72% female)                                                           |
| Reid <sup>58</sup> (2014)     | New Zealand (general practice; work setting OSs not specified) | Self-reported behavior, experiences, expectations and perceptions regarding physiotherapy referral and management (hip and/or knee OA) | Quantitative  | Survey (RR: 46% (GP) and 26% (OS))               | Descriptive statistics (frequency)                                     | GP (n=24)<br>OS (n=20)<br>Total group: 34% female, mean age 52.2 years (SD: 8.5) |
| De Rooij <sup>59</sup> (2020) | The Netherlands (primary care)                                 | Facilitators and barriers for usage of a strategy for exercise prescription in patients with comorbidity (knee OA)                     | Mixed-methods | 1) Survey (RR: 100%)<br>2) Individual interviews | 1) Descriptive statistics (frequency)<br>2) Summarizing notes          | 1) PT (n=34, 68% female, mean age 43.7 years (SD: 11.1))<br>2) PT (n=10)         |
| Holden <sup>60</sup> (2009)   | United Kingdom (NHS and non-NHS)                               | Attitudes and beliefs regarding exercise (knee OA)                                                                                     | Mixed-methods | 1) Survey (RR: 58%)<br>2) Individual interviews  | 1) Descriptive statistics (level of agreement)<br>2) Thematic analysis | 1) PT (n=538, 87% female)<br>2) PT (n=24, 67% female)                            |

1  
2  
3  
4  
5  
6  
7  
8  
9  
10  
11  
12  
13  
14  
15  
16  
17  
18  
19  
20  
21  
22  
23  
24  
25  
26  
27  
28  
29  
30  
31  
32  
33  
34  
35  
36  
37  
38  
39  
40  
41  
42  
43  
44  
45  
46

---

|                            |                                            |                                                                                                                                    |               |                                                 |                                                                         |                                                                             |
|----------------------------|--------------------------------------------|------------------------------------------------------------------------------------------------------------------------------------|---------------|-------------------------------------------------|-------------------------------------------------------------------------|-----------------------------------------------------------------------------|
| Kloek <sup>61</sup> (2020) | The Netherlands<br>(primary care practice) | Experiences with and determinants related to the usage of the blended physiotherapy intervention “e-Exercise” (hip and/or knee OA) | Mixed-methods | 1) Survey (RR: 40%)<br>2) Individual interviews | 1) Descriptive statistics (frequency)<br>2) Grounded theory methodology | 1) PT (n=49)<br>2) PT (n=9, 33% female, median age 52 years (range: 24-59)) |
|----------------------------|--------------------------------------------|------------------------------------------------------------------------------------------------------------------------------------|---------------|-------------------------------------------------|-------------------------------------------------------------------------|-----------------------------------------------------------------------------|

---

694 <sup>a</sup> GP: general practitioner; NHS: National Health Service; OA: osteoarthritis; OS: orthopedic surgeon; PT: physiotherapist; RH: rheumatologist; RR: response rate; SD:  
695 standard deviation.

696 <sup>b,c</sup> Data for both studies were collected during the same interview.

For peer review only

697 **Table 2.** Distribution of the extracted factors per included article across the domains, which were largely based on the Tailored Implementation  
 698 of Chronic Diseases checklist<sup>a</sup>

| Reference                            | Domain 1:<br>Intervention<br>factors | Domain 2:<br>Individual<br>HCP<br>factors | Domain 3:<br>Patient<br>factors | Domain 4:<br>Professional<br>interactions | Domain 5:<br>Incentives<br>and<br>resources | Domain 6:<br>Capacity for<br>organizational<br>change | Domain 7:<br>Social,<br>political,<br>and legal<br>factors | Domain 8:<br>Patient and<br>HCP<br>interactions | Domain 9:<br>Disease<br>factors | Total<br>number of<br>factors in<br>article |
|--------------------------------------|--------------------------------------|-------------------------------------------|---------------------------------|-------------------------------------------|---------------------------------------------|-------------------------------------------------------|------------------------------------------------------------|-------------------------------------------------|---------------------------------|---------------------------------------------|
| Allison <sup>26</sup><br>(2019)      |                                      | 3                                         |                                 | 2                                         | 2                                           | 1                                                     |                                                            | 4                                               |                                 | 12                                          |
| Bossen <sup>27</sup><br>(2016)       | 8                                    |                                           |                                 |                                           |                                             |                                                       |                                                            |                                                 |                                 | 8                                           |
| Christiansen <sup>28</sup><br>(2020) | 1                                    | 5                                         | 2                               |                                           |                                             |                                                       |                                                            | 1                                               |                                 | 9                                           |
| Davis <sup>29</sup><br>(2018)        | 6                                    |                                           | 1                               |                                           |                                             |                                                       |                                                            |                                                 |                                 | 7                                           |
| De Rooij <sup>30</sup><br>(2014)     | 3                                    | 2                                         |                                 |                                           |                                             |                                                       |                                                            |                                                 |                                 | 5                                           |
| Egerton <sup>31</sup><br>(2017)      | 20                                   | 3                                         | 1                               | 9                                         | 3                                           |                                                       |                                                            | 1                                               |                                 | 37                                          |
| Egerton <sup>32</sup><br>(2018)      | 5                                    | 9                                         | 5                               |                                           | 6                                           |                                                       | 1                                                          | 1                                               | 5                               | 32                                          |
| Hinman <sup>33</sup><br>(2016)       | 7                                    | 1                                         | 2                               | 10                                        |                                             |                                                       |                                                            |                                                 |                                 | 20                                          |
| Hinman <sup>34</sup>                 | 18                                   |                                           |                                 |                                           |                                             |                                                       |                                                            |                                                 |                                 | 18                                          |

[37]



1  
2  
3  
4  
5  
6  
7  
8  
9  
10  
11  
12  
13  
14  
15  
16  
17  
18  
19  
20  
21  
22  
23  
24  
25  
26  
27  
28  
29  
30  
31  
32  
33  
34  
35  
36  
37  
38  
39  
40  
41  
42  
43  
44  
45  
46

|                                 |    |    |    |    |   |   |  |   |    |
|---------------------------------|----|----|----|----|---|---|--|---|----|
| (2017)                          |    |    |    |    |   |   |  |   |    |
| Knoop <sup>35</sup><br>(2020)   | 4  |    | 1  | 1  |   |   |  |   | 6  |
| Law <sup>36</sup> (2019)        | 8  | 1  | 5  | 1  | 2 |   |  | 1 | 18 |
| Lawford <sup>37</sup><br>(2019) | 26 |    |    |    |   |   |  |   | 26 |
| Lawford <sup>38</sup><br>(2020) | 11 |    | 7  |    |   |   |  | 1 | 19 |
| Lawford <sup>39</sup><br>(2021) | 12 |    | 3  |    |   |   |  |   | 15 |
| MacKay <sup>40</sup><br>(2018)  | 6  | 5  | 14 | 7  | 6 | 2 |  | 1 | 41 |
| MacKay <sup>41</sup><br>(2020)  | 4  | 12 | 5  | 1  | 1 |   |  | 4 | 27 |
| Mann <sup>42</sup><br>(2011)    | 2  | 1  | 4  | 10 | 1 |   |  | 1 | 19 |
| Miller <sup>43</sup><br>(2020)  | 4  | 4  | 7  | 3  | 8 |   |  | 1 | 29 |
| Nielsen <sup>44</sup><br>(2014) | 13 | 8  | 1  |    | 3 | 2 |  |   | 27 |
| Okwera <sup>45</sup><br>(2019)  | 4  | 6  | 6  | 12 |   |   |  | 2 | 32 |
| Poitras <sup>46</sup>           | 11 | 13 | 19 | 3  |   |   |  | 1 | 52 |

|                                  |    |    |   |    |   |  |   |   |   |    |
|----------------------------------|----|----|---|----|---|--|---|---|---|----|
| (2010)                           |    |    |   |    |   |  |   |   |   |    |
| Rosemann <sup>47</sup><br>(2006) | 1  | 4  | 5 | 4  | 6 |  | 1 | 1 | 1 | 23 |
| Selten <sup>48</sup><br>(2017)   | 7  | 3  | 3 | 14 | 2 |  |   | 4 |   | 33 |
| Tang <sup>49</sup> (2020)        |    | 12 | 4 |    |   |  |   | 1 |   | 17 |
| Teo <sup>50</sup> (2020)         | 3  | 11 | 8 |    |   |  |   |   | 1 | 23 |
| Wallis <sup>51</sup><br>(2020)   | 17 |    | 7 | 3  | 2 |  |   |   | 1 | 30 |
| Cottrell <sup>52</sup><br>(2016) | 12 | 10 | 4 | 2  | 3 |  |   |   |   | 31 |
| Duarte <sup>53</sup><br>(2019)   | 1  |    | 2 |    |   |  |   |   |   | 3  |
| Hill <sup>54</sup> (2018)        |    | 5  |   | 2  |   |  |   |   |   | 7  |
| Hill <sup>55</sup> (2018)        | 2  | 4  |   | 2  |   |  |   |   |   | 8  |
| Hofstede <sup>56</sup><br>(2016) | 5  | 3  |   | 4  | 1 |  | 1 |   |   | 14 |
| Lawford <sup>57</sup><br>(2018)  | 33 |    |   |    |   |  |   |   |   | 33 |
| Reid <sup>58</sup> (2014)        | 4  | 1  | 3 | 1  |   |  |   |   |   | 9  |
| De Rooij <sup>59</sup><br>(2020) | 18 | 8  | 4 | 9  | 2 |  | 1 | 3 |   | 45 |

[39]

1  
2  
3  
4  
5  
6  
7  
8  
9  
10  
11  
12  
13  
14  
15  
16  
17  
18  
19  
20  
21  
22  
23  
24  
25  
26  
27  
28  
29  
30  
31  
32  
33  
34  
35  
36  
37  
38  
39  
40  
41  
42  
43  
44  
45  
46

|                                                      |            |            |            |            |           |          |          |           |           |            |
|------------------------------------------------------|------------|------------|------------|------------|-----------|----------|----------|-----------|-----------|------------|
| Holden <sup>60</sup><br>(2009)                       | 13         | 10         | 14         |            | 3         |          |          |           | 2         | 42         |
| Kloek <sup>61</sup><br>(2020)                        | 26         |            |            | 1          | 5         |          |          |           |           | 32         |
| <b>Total<br/>number of<br/>factors in<br/>domain</b> | <b>315</b> | <b>144</b> | <b>137</b> | <b>101</b> | <b>56</b> | <b>7</b> | <b>9</b> | <b>19</b> | <b>21</b> | <b>809</b> |

699 <sup>a</sup> HCP: healthcare professional.

For peer review only

**Table 3.** Overview of barriers, facilitators, and unclear factors that influence the implementation of LIs as perceived by HCPs for all domains, which were largely based on the Tailored Implementation of Chronic Diseases checklist<sup>a</sup>

| Category                              | Barriers                                                                                                                                                                                                                                                                              | Facilitators                                                                                                                                                                                                                                                                                                                                                                                            | Unclear factors |
|---------------------------------------|---------------------------------------------------------------------------------------------------------------------------------------------------------------------------------------------------------------------------------------------------------------------------------------|---------------------------------------------------------------------------------------------------------------------------------------------------------------------------------------------------------------------------------------------------------------------------------------------------------------------------------------------------------------------------------------------------------|-----------------|
| <i>Domain 1: Intervention factors</i> |                                                                                                                                                                                                                                                                                       |                                                                                                                                                                                                                                                                                                                                                                                                         |                 |
| Effectiveness                         | <ul style="list-style-type: none"> <li>- LIs have little or no effect on OA<sup>28,31,32,43,45,46,48,52,58,60</sup></li> <li>- Potential effects of LIs are difficult to accomplish<sup>46,47,52,60</sup></li> </ul>                                                                  | <ul style="list-style-type: none"> <li>- LIs have positive effects on affected joint(s)<sup>34,37,39-41,46,48,51,52,57,60</sup></li> <li>- LIs have positive effects on general health<sup>32,39,46,48,55,56</sup></li> <li>- LIs have positive mental effects<sup>29,34,36,37,39,48,51,56</sup></li> <li>- LIs have positive effects (not further specified)<sup>33,36,43,48,51,53,56</sup></li> </ul> |                 |
| Safety                                | <ul style="list-style-type: none"> <li>- LIs are unsafe or have negative effects<sup>38,46,51,60</sup></li> </ul>                                                                                                                                                                     | <ul style="list-style-type: none"> <li>- LIs are safe<sup>52,56</sup></li> <li>- Research environment or protocols provide a safety net<sup>30,34,37,38</sup></li> </ul>                                                                                                                                                                                                                                |                 |
| Design                                | <ul style="list-style-type: none"> <li>- Non-optimal content or structure of LIs<sup>33,35,51,52,61</sup></li> <li>- Challenges for patients during participation in LIs<sup>38,39,44</sup></li> <li>- Challenges for HCPs during delivery of LIs<sup>27,29,38,59,61</sup></li> </ul> | <ul style="list-style-type: none"> <li>- Positive experiences with or suggestions to improve the content or structure of LIs<sup>27,29,33,36,39,44,51,59,61</sup></li> <li>- Ease for patients during participation in LIs<sup>38,39,51</sup></li> <li>- Ease for HCPs during delivery of LIs<sup>29,30,33,38,44,59,61</sup></li> </ul>                                                                 |                 |
| Personalized treatment                | <ul style="list-style-type: none"> <li>- Insufficient ability to provide personalized treatment within LIs<sup>31,44,61</sup></li> </ul>                                                                                                                                              | <ul style="list-style-type: none"> <li>- Ability and importance of providing personalized treatment within LIs<sup>36,38,41,44,46,50,52,59-61</sup></li> </ul>                                                                                                                                                                                                                                          |                 |
| Accessibility                         | <ul style="list-style-type: none"> <li>- LIs are unavailable or inaccessible<sup>27,32,40,42,43,52,55,58,60</sup></li> </ul>                                                                                                                                                          | <ul style="list-style-type: none"> <li>- LIs are available or accessible, or suggestions for improvement<sup>31,36,40,45,56,58</sup></li> </ul>                                                                                                                                                                                                                                                         |                 |

[41]

1  
2  
3  
4  
5  
6  
7  
8  
9  
10  
11  
12  
13  
14  
15  
16  
17  
18  
19  
20  
21  
22  
23  
24  
25  
26  
27  
28  
29  
30  
31  
32  
33  
34  
35  
36  
37  
38  
39  
40  
41  
42  
43  
44  
45  
46

|                                         |                                                                                                                        |                                                                                                                     |                                     |
|-----------------------------------------|------------------------------------------------------------------------------------------------------------------------|---------------------------------------------------------------------------------------------------------------------|-------------------------------------|
|                                         | - Costs of LIs to patients <sup>31,32,40,43,50,51</sup>                                                                | - LIs are feasible or sustainable <sup>31,35,36,41,59</sup>                                                         |                                     |
|                                         | - LIs are not feasible or sustainable <sup>31,59</sup>                                                                 | - Convenience for patients when accessing LIs <sup>51</sup>                                                         |                                     |
|                                         | - Inconvenience to patients when accessing LIs <sup>50-52</sup>                                                        |                                                                                                                     |                                     |
| Telehealth                              | - Disadvantages of telehealth in terms of effectiveness <sup>31,57,61</sup>                                            | - Benefits of telehealth in terms of effectiveness <sup>27,34,37,57,61</sup>                                        |                                     |
|                                         | - Telehealth is not safe for patients or patient/data privacy <sup>31,57</sup>                                         | - Telehealth is safe for patients or patient/data privacy <sup>34,57,61</sup>                                       |                                     |
|                                         | - Challenges for HCPs regarding lack of physical/visual contact <sup>34,37,57,61</sup>                                 | - Lack of physical/visual contact not a major issue for HCPs <sup>34,37,57</sup>                                    |                                     |
|                                         | - Other challenges for HCPs regarding feasibility of telehealth <sup>27,31,34,37,57,61</sup>                           | - Positive attitude or needs of HCPs regarding feasibility of telehealth <sup>34,37,39,57,61</sup>                  |                                     |
|                                         | - Patient-related challenges regarding feasibility of telehealth <sup>27,31,61</sup>                                   | - Patient-related benefits regarding feasibility of telehealth <sup>27,31,34,37,57</sup>                            |                                     |
|                                         | - Negative aspects regarding communication and relationship using telehealth <sup>33,34,37,39</sup>                    | - Positive aspects regarding communication and relationship using telehealth <sup>37,39</sup>                       |                                     |
| <i>Domain 2: Individual HCP factors</i> |                                                                                                                        |                                                                                                                     |                                     |
| Expertise                               | - Lack of knowledge or skills around LIs or promoting behavioral change <sup>26,28,32,40,41,44,46,48-50,55,59,60</sup> | - Having or improving knowledge or skills around LIs or promoting behavioral change <sup>32,33,40,41,44,45,49</sup> | - Clinical experience <sup>41</sup> |
|                                         | - Lack of knowledge or skills around OA care in general <sup>42,43,45,47</sup>                                         | - Having or improving knowledge or skills around OA care in general <sup>32,43,45,47</sup>                          |                                     |
|                                         | - Lack of knowledge or skills around specific resources <sup>32,49,59</sup>                                            | - Available resources might improve knowledge and decision-making <sup>30,49,59</sup>                               |                                     |

|                                            |                                                                                                                                                                                                           |                                                                                                                                                                                                                 |                                                                                                            |
|--------------------------------------------|-----------------------------------------------------------------------------------------------------------------------------------------------------------------------------------------------------------|-----------------------------------------------------------------------------------------------------------------------------------------------------------------------------------------------------------------|------------------------------------------------------------------------------------------------------------|
| Attitude                                   | - Negative attitude toward LIs <sup>28,52,60</sup><br>- Negative attitude toward guidelines or protocols <sup>45</sup>                                                                                    | - Positive attitude toward LIs <sup>32,40,41,44-46,49,50,52,54-56,58</sup><br>- Positive attitude toward guidelines or protocols <sup>26,56,59</sup>                                                            | - Autonomy <sup>36</sup>                                                                                   |
| Role                                       | - Perception of own role potentially impeding prescription or follow-up of LIs <sup>28,32,41,43,46-50,52,54,60</sup><br>- Negative consequences for own role when referring patients to LIs <sup>31</sup> | - Perception of own role potentially stimulating prescription or follow-up of LIs <sup>32,40,41,46,47,50,52,54,55,60</sup><br>- Positive consequences for own role when referring patients to LIs <sup>31</sup> |                                                                                                            |
| <i>Domain 3: Patient factors</i>           |                                                                                                                                                                                                           |                                                                                                                                                                                                                 |                                                                                                            |
| Health status                              | - Severity of disease and symptoms <sup>31,43,46,49,51,60</sup><br>- Negative impact of comorbidities <sup>28,38,43,46,47,50,51</sup><br>- Other patient characteristics <sup>46,51,58</sup>              | - Severity of disease and symptoms <sup>38,46,52,58,60</sup><br>- Other patient characteristics <sup>40,50,58</sup>                                                                                             | - Severity of disease and symptoms <sup>41,45,52,60</sup><br>- Other patient characteristics <sup>40</sup> |
| Treatment expectations and preferences     | - Negative attitude toward LIs <sup>28,32,33,35,38,40-47,50-52,59,60</sup><br>- Positive attitude toward TJA <sup>36,42,47</sup>                                                                          | - Make use of patients' preference for TJA within LIs <sup>36</sup>                                                                                                                                             | - Patients' preferences <sup>45</sup>                                                                      |
| Active participation                       | - Low patient adherence or engagement <sup>32,36,40,41,45,46,50,53,60</sup>                                                                                                                               | - High patient adherence or engagement <sup>33,38,39,53</sup><br>- Importance of high patient adherence or engagement for effectiveness of LIs <sup>29,40,41,46,52,60</sup>                                     |                                                                                                            |
| Capabilities                               | - Low health literacy <sup>32,36,38-40,42,43,46,48,50,51,59,60</sup><br>- Limited financial resources <sup>40,43</sup><br>- Other responsibilities <sup>40,51</sup>                                       | - High health literacy or importance of education <sup>38,41,42,48,50,59</sup><br>- Social support <sup>39,47</sup>                                                                                             | - Health literacy <sup>45</sup><br>- Other responsibilities <sup>40</sup>                                  |
| <i>Domain 4: Professional interactions</i> |                                                                                                                                                                                                           |                                                                                                                                                                                                                 |                                                                                                            |
| Collaboration                              | - Non-optimal interdisciplinary collaboration or                                                                                                                                                          | - Good interdisciplinary collaboration or healthcare provision, or suggestions for improvement <sup>26,31,33,36,40,42,43,45-48,51,52,54-</sup>                                                                  |                                                                                                            |

[43]

|                                                     |                                                                                                                                                                         |                                                                                                                                                          |
|-----------------------------------------------------|-------------------------------------------------------------------------------------------------------------------------------------------------------------------------|----------------------------------------------------------------------------------------------------------------------------------------------------------|
|                                                     | healthcare provision <sup>26,31,33,40,42,45,46,48,52,59</sup>                                                                                                           | 56,58,59,61                                                                                                                                              |
|                                                     | - No access to other HCPs <sup>40</sup>                                                                                                                                 | - Access to other HCPs <sup>31,40-42,45</sup>                                                                                                            |
| Communication and referral                          | - Lack of communication between HCPs <sup>45,47,59</sup><br>- Challenges of communication and referral procedures <sup>33,35,43,45,59</sup>                             | - Improving communication between HCPs <sup>31,33,45,47,51,56</sup><br>- Needs regarding communication and referral procedures <sup>31,40,45,48,51</sup> |
| <i>Domain 5: Incentives and resources</i>           |                                                                                                                                                                         |                                                                                                                                                          |
| Time                                                | - Lack of time within patient consultations <sup>32,40,42-44,48,52,60</sup><br>- Lack of time due to other demands (or not further specified) <sup>31,36,40,47,61</sup> | - Adequate duration of patient consultations <sup>32,40</sup><br>- Adequate duration of specific interventions or protocols <sup>31,44,59,61</sup>       |
| Financial resources                                 | - Limited financial resources within organization <sup>44,47</sup>                                                                                                      | - Financial reward for implementing LIs <sup>31,47,59</sup>                                                                                              |
| Information resources                               | - Lack of information resources <sup>26,36,43,47</sup><br>- Challenges in accessing information resources <sup>40,43,52</sup>                                           | - Availability of information resources <sup>26,43,51,56</sup><br>- Access to information resources <sup>32,40,41,51</sup>                               |
| Facilities                                          | - Negative attitude toward information technology <sup>32</sup>                                                                                                         | - Potential use of information technology <sup>32,43</sup><br>- Benefits of working in health centers <sup>48</sup>                                      |
| <i>Domain 6: Capacity for organizational change</i> |                                                                                                                                                                         |                                                                                                                                                          |
| Professional paradigm                               |                                                                                                                                                                         | - Adequate professional paradigm or suggestions for expansion <sup>26,40,44</sup>                                                                        |
| Monitoring                                          |                                                                                                                                                                         | - Audit <sup>56</sup>                                                                                                                                    |
| Support within the                                  | - Management not supportive <sup>59</sup>                                                                                                                               |                                                                                                                                                          |

1  
2  
3 organization

4  
5 *Domain 7: Social, political, and legal factors*

6  
7 Healthcare system - Restrictions due to health insurance<sup>40,47,59</sup> - Benefits of good health insurance<sup>43,45,59</sup>  
8  
9 - Government subsidies<sup>32</sup>

10  
11 *Domain 8: Patient and HCP interactions*

12  
13 Therapeutic alliance - Potential negative influence of implementing LIs to - Importance of communication and relationship<sup>38,41,47,48</sup>  
14 relationship<sup>36</sup>  
15  
16 Lifestyle as - Challenges of discussing weight<sup>26,32,41,48,49</sup> - Factors that could ease the way to discussing  
17 conversation topic weight<sup>26,41,43,46,48</sup>  
18

19  
20 *Domain 9: Disease factors*

21 Image - OA seen as low priority<sup>28,31,42,45-47</sup> - Optimistic views toward OA<sup>32,46</sup>  
22  
23 - OA seen as untreatable and local condition (wear-  
24 and-tear)<sup>32,43,45,46,50,51,60</sup>  
25

26 702 <sup>a</sup> HCP: healthcare professional; LI: lifestyle intervention; OA: osteoarthritis; TJA: total joint arthroplasty.



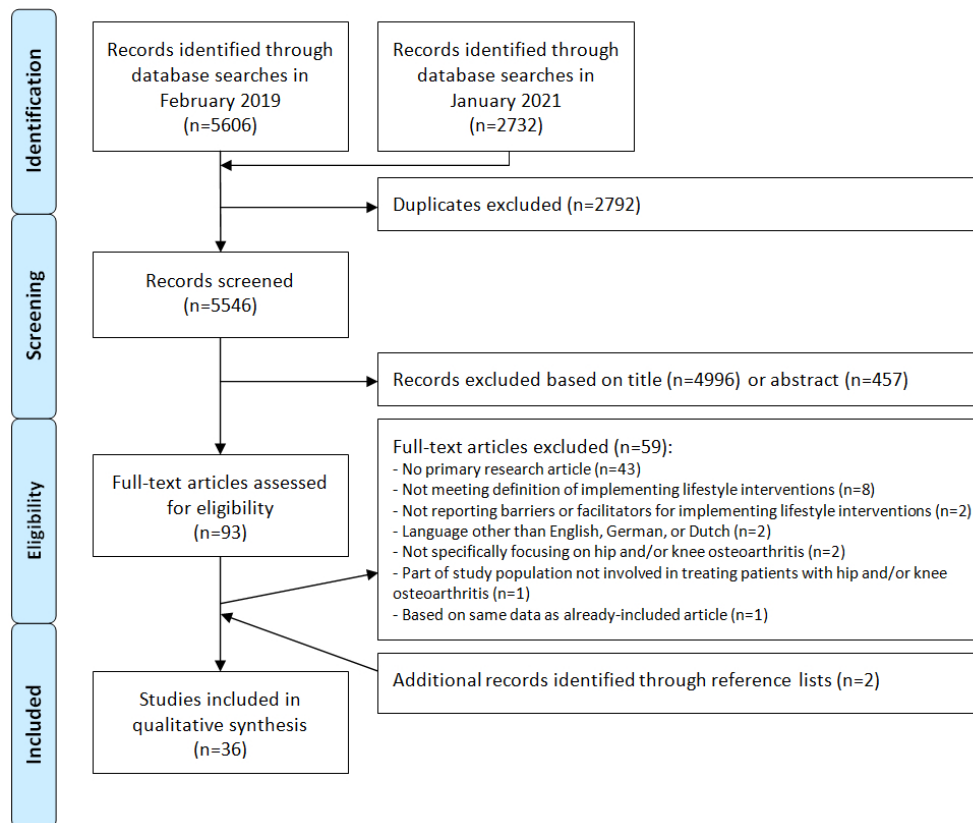

Figure 1. Flowchart of the study selection process

260x217mm (96 x 96 DPI)

### Supplemental File 1. Search strategies for the different databases

The search strategies presented below were applied in five bibliographic electronic databases on two different dates: initially on 19 February 2019 and again on 19 January 2021 to update the results. For each database it is shown below which search strategy was used in 2019 (#1) and in 2021 (#2) and how many records were retrieved using these search strategies.

#### PubMed

|                           |                                                                                                                                                                                                                                                                                                                                                                                                                                                                                                                                                                                                                                                                                                                                                                                                                                                                                                                                                                                                                                                                                                                                                                                                                                                                                                                                                                                                                                                                                                                                                                                                                                                                                                                                                                                                                                                                                                                                                                                                                                                                                                                                                                                                                                                                                                                                                                                                                                                                                                                                                                                                                                                                                                                                                                                                                                                                                                                                                                                                                                                            |
|---------------------------|------------------------------------------------------------------------------------------------------------------------------------------------------------------------------------------------------------------------------------------------------------------------------------------------------------------------------------------------------------------------------------------------------------------------------------------------------------------------------------------------------------------------------------------------------------------------------------------------------------------------------------------------------------------------------------------------------------------------------------------------------------------------------------------------------------------------------------------------------------------------------------------------------------------------------------------------------------------------------------------------------------------------------------------------------------------------------------------------------------------------------------------------------------------------------------------------------------------------------------------------------------------------------------------------------------------------------------------------------------------------------------------------------------------------------------------------------------------------------------------------------------------------------------------------------------------------------------------------------------------------------------------------------------------------------------------------------------------------------------------------------------------------------------------------------------------------------------------------------------------------------------------------------------------------------------------------------------------------------------------------------------------------------------------------------------------------------------------------------------------------------------------------------------------------------------------------------------------------------------------------------------------------------------------------------------------------------------------------------------------------------------------------------------------------------------------------------------------------------------------------------------------------------------------------------------------------------------------------------------------------------------------------------------------------------------------------------------------------------------------------------------------------------------------------------------------------------------------------------------------------------------------------------------------------------------------------------------------------------------------------------------------------------------------------------------|
| <p>#1<br/>(1798 hits)</p> | <p>(((((("Health Personnel"[Mesh] OR "Delivery of Health Care"[Mesh] OR "Primary Health Care"[Mesh]) OR (Health personnel*[tiab] OR Health professional*[tiab] OR Medical staff*[tiab] OR Clinician*[tiab] OR Medical specialist*[tiab] OR Health care*[tiab] OR Healthcare*[tiab] OR Primary care*[tiab] OR Secondary care*[tiab] OR Allied health personnel*[tiab] OR Allied health professional*[tiab] OR Paramedic*[tiab] OR Nurse*[tiab] OR Nursing staff*[tiab] OR Nurse practit*[tiab] OR Physician assistant*[tiab] OR Physicians assistant*[tiab] OR Nutritionist*[tiab] OR Dietician*[tiab] OR Dietitian*[tiab] OR Physical therapist*[tiab] OR Physiotherapist*[tiab] OR Lifestyle coach*[tiab] OR Lifestyle counselor*[tiab] OR Physician*[tiab] OR Orthopedic surgeon*[tiab] OR Orthopedist*[tiab] OR General practitioner*[tiab] OR General practice*[tiab] OR Psychologist*[tiab]))) AND<br/>           AND<br/>           (((("Osteoarthritis"[Mesh] OR (Osteoarthrit*[tiab] OR Osteoarthro*[tiab] OR Degenerative arthrit*[tiab]))) AND (((("Hip Joint"[Mesh] OR "Knee Joint"[Mesh] OR "Lower Extremity"[Mesh]) OR (Hip*[tiab] OR Cox*[tiab] OR Acetabulofemoral joint*[tiab] OR Knee*[tiab] OR Superior tibulofibular joint*[tiab] OR Patellofemoral*[tiab] OR Lower extremit*[tiab] OR Lower limb*[tiab]))) AND<br/>           AND<br/>           (((("Life Style"[Mesh] OR "Behavior"[Mesh]) OR (Life style*[tiab] OR Lifestyle*[tiab] OR Behavior*[tiab] OR Behaviour*[tiab] OR Habit*[tiab] OR Risk reduction*[tiab] OR Early therap*[tiab] OR Secondary prevention*[tiab] OR Tertiary prevention*[tiab] OR Disease prevention*[tiab]))) OR<br/>           (((("Exercise"[Mesh] OR "Exercise Therapy"[Mesh] OR "Sports"[Mesh]) OR (Physical activit*[tiab] OR Physical training*[tiab] OR Physical fitness*[tiab] OR Physical condition*[tiab] OR Physical therap*[tiab] OR Physiotherap*[tiab] OR Exercis*[tiab] OR Run*[tiab] OR Jog*[tiab] OR Walk*[tiab] OR Bicycl*[tiab] OR Swim*[tiab] OR Strength*[tiab] OR Resistance*[tiab] OR Sport*[tiab] OR Athletic*[tiab] OR Train*[tiab] OR Sedentary[tiab]))) OR (((("Diet, Food, and Nutrition"[Mesh] OR "Nutrition Therapy"[Mesh] OR "Body Weight"[Mesh]) OR (Healthy diet*[tiab] OR Healthy eating*[tiab] OR Nutrition*[tiab] OR Diet*[tiab] OR Food*[tiab] OR Weight loss*[tiab] OR Weight loss program*[tiab] OR Weight reduction*[tiab] OR Weight reduction program*[tiab] OR Body weight*[tiab] OR Overweight*[tiab] OR Obesity*[tiab] OR Overnutrition*[tiab] OR Hypernutrition*[tiab]))) AND<br/>           AND<br/>           (((("Attitude"[Mesh] OR "Motivation"[Mesh]) OR (Barrier*[tiab] OR Facilitator*[tiab] OR Enabler*[tiab] OR Driver*[tiab] OR Motivat*[tiab] OR Opinion*[tiab] OR View*[tiab] OR Attitude*[tiab] OR Expectation*[tiab] OR Incentive*[tiab] OR Disincentive*[tiab] OR Belief*[tiab] OR Influencing factor*[tiab] OR Experience*[tiab] OR Perspective*[tiab] OR Perception*[tiab] OR Hinder*[tiab] OR Impediment*[tiab] OR obstacle*[tiab])))</p> |
| <p>#2 (467 hits)</p>      | <p>#1 AND ((("2019/01/01"[Date - Create] : "3000"[Date - Create]) OR ("2019/01/01"[Date - Entry] : "3000"[Date - Entry]) OR ("2019/01/01"[Date - MeSH] : "3000"[Date - MeSH]))</p>                                                                                                                                                                                                                                                                                                                                                                                                                                                                                                                                                                                                                                                                                                                                                                                                                                                                                                                                                                                                                                                                                                                                                                                                                                                                                                                                                                                                                                                                                                                                                                                                                                                                                                                                                                                                                                                                                                                                                                                                                                                                                                                                                                                                                                                                                                                                                                                                                                                                                                                                                                                                                                                                                                                                                                                                                                                                         |

#### Embase

|           |                                                                                                                                                            |
|-----------|------------------------------------------------------------------------------------------------------------------------------------------------------------|
| <p>#1</p> | <p>('health care personnel'/exp OR 'health care delivery'/exp OR ('Health personnel*' OR 'Health professional*' OR 'Medical staff*' OR 'Clinician*' OR</p> |
|-----------|------------------------------------------------------------------------------------------------------------------------------------------------------------|

|                   |                                                                                                                                                                                                                                                                                                                                                                                                                                                                                                                                                                                                                                                                                                                                                                                                                                                                                                                                                                                                                                                                                                                                                                                                                                                                                                                                                                                                                                                                                                                                                                                                                                                                                                                                                                                                                                                                                                                                                                                                                                                                                                                                                                                                                                                                                                                                                                    |
|-------------------|--------------------------------------------------------------------------------------------------------------------------------------------------------------------------------------------------------------------------------------------------------------------------------------------------------------------------------------------------------------------------------------------------------------------------------------------------------------------------------------------------------------------------------------------------------------------------------------------------------------------------------------------------------------------------------------------------------------------------------------------------------------------------------------------------------------------------------------------------------------------------------------------------------------------------------------------------------------------------------------------------------------------------------------------------------------------------------------------------------------------------------------------------------------------------------------------------------------------------------------------------------------------------------------------------------------------------------------------------------------------------------------------------------------------------------------------------------------------------------------------------------------------------------------------------------------------------------------------------------------------------------------------------------------------------------------------------------------------------------------------------------------------------------------------------------------------------------------------------------------------------------------------------------------------------------------------------------------------------------------------------------------------------------------------------------------------------------------------------------------------------------------------------------------------------------------------------------------------------------------------------------------------------------------------------------------------------------------------------------------------|
| (3036 hits)       | <p>'Medical specialist*' OR 'Health care*' OR 'Healthcare*' OR 'Primary care*' OR 'Secondary care*' OR 'Allied health personnel*' OR 'Allied health professional*' OR 'Paramedic*' OR 'Nurse*' OR 'Nursing staff*' OR 'Nurse practit*' OR 'Physician assistant*' OR 'Physicians assistant*' OR 'Nutritionist*' OR 'Dietician*' OR 'Dietitian*' OR 'Physical therapist*' OR 'Physiotherapist*' OR 'Lifestyle coach*' OR 'Lifestyle counselor*' OR 'Physician*' OR 'Orthopedic surgeon*' OR 'Orthopedist*' OR 'General practitioner*' OR 'General practice*' OR 'Psychologist*'):ab,ti)</p> <p><b>AND</b></p> <p>('osteoarthritis'/exp OR ('Osteoarthritis*' OR 'Osteoarthro*' OR 'Degenerative arthrit*'):ab,ti) AND ('lower limb'/exp OR ('Hip*' OR 'Cox*' OR 'Acetabulofemoral joint*' OR 'Knee*' OR 'Superior tibulofibular joint*' OR 'Patellofemoral*' OR 'Lower extremit*' OR 'Lower limb*'):ab,ti)</p> <p><b>AND</b></p> <p>((('lifestyle'/exp OR 'lifestyle modification'/exp OR 'behavior'/exp OR ('Life style*' OR 'Lifestyle*' OR 'Behavior*' OR 'Behaviour*' OR 'Habit*' OR 'Risk reduction*' OR 'Early therap*' OR 'Secondary prevention*' OR 'Tertiary prevention*' OR 'Disease prevention*'):ab,ti) OR ('exercise'/exp OR 'kinesiotherapy'/exp OR 'sport'/exp OR ('Physical activit*' OR 'Physical training*' OR 'Physical fitness*' OR 'Physical condition*' OR 'Physical therap*' OR 'Physiotherap*' OR 'Exercis*' OR 'Run*' OR 'Jog*' OR 'Walk*' OR 'Bicycl*' OR 'Swim*' OR 'Strength*' OR 'Resistance*' OR 'Sport*' OR 'Athletic*' OR 'Train*' OR 'Sedentary*'):ab,ti) OR ('nutrition'/exp OR 'diet therapy'/exp OR 'body weight'/exp OR 'body weight management'/exp OR ('Healthy diet*' OR 'Healthy eating*' OR 'Nutrition*' OR 'Diet*' OR 'Food*' OR 'Weight loss*' OR 'Weight loss program*' OR 'Weight reduction*' OR 'Weight reduction program*' OR 'Body weight*' OR 'Overweight*' OR 'Obesity*' OR 'Overnutrition*' OR 'Hypernutrition*'):ab,ti))</p> <p><b>AND</b></p> <p>('attitude'/exp OR 'motivation'/exp OR ('Barrier*' OR 'Facilitator*' OR 'Enabler*' OR 'Driver*' OR 'Motivat*' OR 'Opinion*' OR 'View*' OR 'Attitude*' OR 'Expectation*' OR 'Incentive*' OR 'Disincentive*' OR 'Belief*' OR 'Influencing factor*' OR 'Experience*' OR 'Perspective*' OR 'Perception*' OR 'Hinder*' OR 'Impediment*' OR 'obstacle*'):ab,ti)</p> |
| #2<br>(1021 hits) | #1 <b>AND</b> [1-1-2019]/sd NOT [20-1-2021]/sd                                                                                                                                                                                                                                                                                                                                                                                                                                                                                                                                                                                                                                                                                                                                                                                                                                                                                                                                                                                                                                                                                                                                                                                                                                                                                                                                                                                                                                                                                                                                                                                                                                                                                                                                                                                                                                                                                                                                                                                                                                                                                                                                                                                                                                                                                                                     |

## CINAHL

|                  |                                                                                                                                                                                                                                                                                                                                                                                                                                                                                                                                                                                                                                                                                                                                                                                                                                                                                                                                                                                                                                                                                                                                                                                                                                                                                                                                                                                                                                                                                                                                                                                                                                                                                                                                                                                                                                     |
|------------------|-------------------------------------------------------------------------------------------------------------------------------------------------------------------------------------------------------------------------------------------------------------------------------------------------------------------------------------------------------------------------------------------------------------------------------------------------------------------------------------------------------------------------------------------------------------------------------------------------------------------------------------------------------------------------------------------------------------------------------------------------------------------------------------------------------------------------------------------------------------------------------------------------------------------------------------------------------------------------------------------------------------------------------------------------------------------------------------------------------------------------------------------------------------------------------------------------------------------------------------------------------------------------------------------------------------------------------------------------------------------------------------------------------------------------------------------------------------------------------------------------------------------------------------------------------------------------------------------------------------------------------------------------------------------------------------------------------------------------------------------------------------------------------------------------------------------------------------|
| #1<br>(424 hits) | <p>(MH "Health Personnel+" OR MH "Health Care Delivery+" OR TI(Health personnel* OR Health professional* OR Medical staff* OR Clinician* OR Medical specialist* OR Health care* OR Healthcare* OR Primary care* OR Secondary care* OR Allied health personnel* OR Allied health professional* OR Paramedic* OR Nurse* OR Nursing staff* OR Nurse practit* OR Physician assistant* OR Physicians assistant* OR Nutritionist* OR Dietician* OR Dietitian* OR Physical therapist* OR Physiotherapist* OR Lifestyle coach* OR Lifestyle counselor* OR Physician* OR Orthopedic surgeon* OR Orthopedist* OR General practitioner* OR General practice* OR Psychologist*)) OR AB(Health personnel* OR Health professional* OR Medical staff* OR Clinician* OR Medical specialist* OR Health care* OR Healthcare* OR Primary care* OR Secondary care* OR Allied health personnel* OR Allied health professional* OR Paramedic* OR Nurse* OR Nursing staff* OR Nurse practit* OR Physician assistant* OR Physicians assistant* OR Nutritionist* OR Dietician* OR Dietitian* OR Physical therapist* OR Physiotherapist* OR Lifestyle coach* OR Lifestyle counselor* OR Physician* OR Orthopedic surgeon* OR Orthopedist* OR General practitioner* OR General practice* OR Psychologist*))</p> <p><b>AND</b></p> <p>(MH "Osteoarthritis+" OR TI(Osteoarthritis* OR Osteoarthro* OR Degenerative arthrit*) OR AB(Osteoarthritis* OR Osteoarthro* OR Degenerative arthrit*)) AND (MH "Lower Extremity+" OR MH "Hip Joint+" OR MH "Knee Joint+" OR TI(Hip* OR Cox* OR Acetabulofemoral joint* OR Knee* OR Superior tibulofibular joint* OR Patellofemoral* OR Lower extremit* OR Lower limb*) OR AB(Hip* OR Cox* OR Acetabulofemoral joint* OR Knee* OR Superior tibulofibular joint* OR Patellofemoral* OR Lower extremit* OR Lower limb*))</p> |
|------------------|-------------------------------------------------------------------------------------------------------------------------------------------------------------------------------------------------------------------------------------------------------------------------------------------------------------------------------------------------------------------------------------------------------------------------------------------------------------------------------------------------------------------------------------------------------------------------------------------------------------------------------------------------------------------------------------------------------------------------------------------------------------------------------------------------------------------------------------------------------------------------------------------------------------------------------------------------------------------------------------------------------------------------------------------------------------------------------------------------------------------------------------------------------------------------------------------------------------------------------------------------------------------------------------------------------------------------------------------------------------------------------------------------------------------------------------------------------------------------------------------------------------------------------------------------------------------------------------------------------------------------------------------------------------------------------------------------------------------------------------------------------------------------------------------------------------------------------------|

|                  |                                                                                                                                                                                                                                                                                                                                                                                                                                                                                                                                                                                                                                                                                                                                                                                                                                                                                                                                                                                                                                                                                                                                                                                                                                                                                                                                                                                                                                                                                                                                                                                                                                                                                                                                                                                                                                                                                                                                                                                                                                                                                                                                                                                                                                                                                |
|------------------|--------------------------------------------------------------------------------------------------------------------------------------------------------------------------------------------------------------------------------------------------------------------------------------------------------------------------------------------------------------------------------------------------------------------------------------------------------------------------------------------------------------------------------------------------------------------------------------------------------------------------------------------------------------------------------------------------------------------------------------------------------------------------------------------------------------------------------------------------------------------------------------------------------------------------------------------------------------------------------------------------------------------------------------------------------------------------------------------------------------------------------------------------------------------------------------------------------------------------------------------------------------------------------------------------------------------------------------------------------------------------------------------------------------------------------------------------------------------------------------------------------------------------------------------------------------------------------------------------------------------------------------------------------------------------------------------------------------------------------------------------------------------------------------------------------------------------------------------------------------------------------------------------------------------------------------------------------------------------------------------------------------------------------------------------------------------------------------------------------------------------------------------------------------------------------------------------------------------------------------------------------------------------------|
|                  | <p><b>AND</b><br/>                 ((MH "Life Style+" OR MH "Behavior+" OR TI(Life style* OR Lifestyle* OR Behavior* OR Behaviour* OR Habit* OR Risk reduction* OR Early therap* OR Secondary prevention* OR Tertiary prevention* OR Disease prevention*)) OR AB(Life style* OR Lifestyle* OR Behavior* OR Behaviour* OR Habit* OR Risk reduction* OR Early therap* OR Secondary prevention* OR Tertiary prevention* OR Disease prevention*)) OR (MH "Exercise+" OR MH "Therapeutic Exercise+" OR MH "Sports+" OR TI(Physical activit* OR Physical training* OR Physical fitness* OR Physical condition* OR Physical therap* OR Physiotherap* OR Exercis* OR Run* OR Jog* OR Walk* OR Bicycl* OR Swim* OR Strength* OR Resistance* OR Sport* OR Athletic* OR Train* OR Sedentary) OR AB(Physical activit* OR Physical training* OR Physical fitness* OR Physical condition* OR Physical therap* OR Physiotherap* OR Exercis* OR Run* OR Jog* OR Walk* OR Bicycl* OR Swim* OR Strength* OR Resistance* OR Sport* OR Athletic* OR Train* OR Sedentary)) OR (MH "Nutrition+" OR MH "Food+" OR MH "Diet Therapy+" OR MH "Body Weight+" OR TI(Healthy diet* OR Healthy eating* OR Nutrition* OR Diet* OR Food* OR Weight loss* OR Weight loss program* OR Weight reduction* OR Weight reduction program* OR Body weight* OR Overweight* OR Obesity* OR Overnutrition* OR Hypernutrition*)) OR AB(Healthy diet* OR Healthy eating* OR Nutrition* OR Diet* OR Food* OR Weight loss* OR Weight loss program* OR Weight reduction* OR Weight reduction program* OR Body weight* OR Overweight* OR Obesity* OR Overnutrition* OR Hypernutrition*))</p> <p><b>AND</b><br/>                 (MH "Attitude+" OR MH "Motivation+" OR TI(Barrier* OR Facilitator* OR Enabler* OR Driver* OR Motivat* OR Opinion* OR View* OR Attitude* OR Expectation* OR Incentive* OR Disincentive* OR Belief* OR Influencing factor* OR Experience* OR Perspective* OR Perception* OR Hinder* OR Impediment* OR Obstacle*) OR AB(Barrier* OR Facilitator* OR Enabler* OR Driver* OR Motivat* OR Opinion* OR View* OR Attitude* OR Expectation* OR Incentive* OR Disincentive* OR Belief* OR Influencing factor* OR Experience* OR Perspective* OR Perception* OR Hinder* OR Impediment* OR Obstacle*))</p> |
| #2<br>(598 hits) | #1                                                                                                                                                                                                                                                                                                                                                                                                                                                                                                                                                                                                                                                                                                                                                                                                                                                                                                                                                                                                                                                                                                                                                                                                                                                                                                                                                                                                                                                                                                                                                                                                                                                                                                                                                                                                                                                                                                                                                                                                                                                                                                                                                                                                                                                                             |

PsycINFO

|                 |                                                                                                                                                                                                                                                                                                                                                                                                                                                                                                                                                                                                                                                                                                                                                                                                                                                                                                                                                                                                                                                                                                                                                                                                                                                                                                                                                                                                                                                                                                                                                                                                                                                                                                                                                                                                                                                                                                                                                                                                                                                                                                                                                                   |
|-----------------|-------------------------------------------------------------------------------------------------------------------------------------------------------------------------------------------------------------------------------------------------------------------------------------------------------------------------------------------------------------------------------------------------------------------------------------------------------------------------------------------------------------------------------------------------------------------------------------------------------------------------------------------------------------------------------------------------------------------------------------------------------------------------------------------------------------------------------------------------------------------------------------------------------------------------------------------------------------------------------------------------------------------------------------------------------------------------------------------------------------------------------------------------------------------------------------------------------------------------------------------------------------------------------------------------------------------------------------------------------------------------------------------------------------------------------------------------------------------------------------------------------------------------------------------------------------------------------------------------------------------------------------------------------------------------------------------------------------------------------------------------------------------------------------------------------------------------------------------------------------------------------------------------------------------------------------------------------------------------------------------------------------------------------------------------------------------------------------------------------------------------------------------------------------------|
| #1<br>(49 hits) | <p>(DE "Health Personnel" OR DE "Health Care Delivery" OR DE "Primary Health Care" OR DE "Physical Therapists" OR DE "Nurses" OR DE "Physicians" OR DE "Family Physicians" OR DE "General Practitioners" OR DE "Surgeons" OR DE "Clinical Psychologists" OR DE "Allied Health Personnel" OR DE "Caregivers" OR DE "Medical Personnel" OR DE "Mental Health Personnel" OR DE "Clinicians" OR DE "Therapists" OR DE "Psychologists" OR TI(Health personnel* OR Health professional* OR Medical staff* OR Clinician* OR Medical specialist* OR Health care* OR Healthcare* OR Primary care* OR Secondary care* OR Allied health personnel* OR Allied health professional* OR Paramedic* OR Nurse* OR Nursing staff* OR Nurse practit* OR Physician assistant* OR Physicians assistant* OR Nutritionist* OR Dietician* OR Dietitian* OR Physical therapist* OR Physiotherapist* OR Lifestyle coach* OR Lifestyle counselor* OR Physician* OR Orthopedic surgeon* OR Orthopedist* OR General practitioner* OR General practice* OR Psychologist*) OR AB(Health personnel* OR Health professional* OR Medical staff* OR Clinician* OR Medical specialist* OR Health care* OR Healthcare* OR Primary care* OR Secondary care* OR Allied health personnel* OR Allied health professional* OR Paramedic* OR Nurse* OR Nursing staff* OR Nurse practit* OR Physician assistant* OR Physicians assistant* OR Nutritionist* OR Dietician* OR Dietitian* OR Physical therapist* OR Physiotherapist* OR Lifestyle coach* OR Lifestyle counselor* OR Physician* OR Orthopedic surgeon* OR Orthopedist* OR General practitioner* OR General practice* OR Psychologist*))</p> <p><b>AND</b><br/>                 (TI(Osteoarthritis* OR Osteoarthro* OR Degenerative arthritis*) OR AB(Osteoarthritis* OR Osteoarthro* OR Degenerative arthritis*)) AND (DE "Hips" OR DE "Knee" OR TI(Hip* OR Cox* OR Acetabulofemoral joint* OR Knee* OR Superior tibulofibular joint* OR Patellofemoral* OR Lower extremity* OR Lower limb*) OR AB(Hip* OR Cox* OR Acetabulofemoral joint* OR Knee* OR Superior tibulofibular joint* OR Patellofemoral* OR Lower extremity* OR Lower limb*))</p> |
|-----------------|-------------------------------------------------------------------------------------------------------------------------------------------------------------------------------------------------------------------------------------------------------------------------------------------------------------------------------------------------------------------------------------------------------------------------------------------------------------------------------------------------------------------------------------------------------------------------------------------------------------------------------------------------------------------------------------------------------------------------------------------------------------------------------------------------------------------------------------------------------------------------------------------------------------------------------------------------------------------------------------------------------------------------------------------------------------------------------------------------------------------------------------------------------------------------------------------------------------------------------------------------------------------------------------------------------------------------------------------------------------------------------------------------------------------------------------------------------------------------------------------------------------------------------------------------------------------------------------------------------------------------------------------------------------------------------------------------------------------------------------------------------------------------------------------------------------------------------------------------------------------------------------------------------------------------------------------------------------------------------------------------------------------------------------------------------------------------------------------------------------------------------------------------------------------|

1  
2  
3  
4  
5  
6  
7  
8  
9  
10  
11  
12  
13  
14  
15  
16  
17  
18  
19  
20  
21  
22  
23  
24  
25  
26  
27  
28  
29  
30  
31  
32  
33  
34  
35  
36  
37  
38  
39  
40  
41  
42  
43  
44  
45  
46

|                 |                                                                                                                                                                                                                                                                                                                                                                                                                                                                                                                                                                                                                                                                                                                                                                                                                                                                                                                                                                                                                                                                                                                                                                                                                                                                                                                                                                                                                                                                                                                                                                                                                                                                                                                                                                                                                                                                                                                                                                                                                                                                                                                                                                                                                                                                                                                                                                                                                                                                                                                                                                                                                                                                                                                                                                                                                                                                                                                                      |
|-----------------|--------------------------------------------------------------------------------------------------------------------------------------------------------------------------------------------------------------------------------------------------------------------------------------------------------------------------------------------------------------------------------------------------------------------------------------------------------------------------------------------------------------------------------------------------------------------------------------------------------------------------------------------------------------------------------------------------------------------------------------------------------------------------------------------------------------------------------------------------------------------------------------------------------------------------------------------------------------------------------------------------------------------------------------------------------------------------------------------------------------------------------------------------------------------------------------------------------------------------------------------------------------------------------------------------------------------------------------------------------------------------------------------------------------------------------------------------------------------------------------------------------------------------------------------------------------------------------------------------------------------------------------------------------------------------------------------------------------------------------------------------------------------------------------------------------------------------------------------------------------------------------------------------------------------------------------------------------------------------------------------------------------------------------------------------------------------------------------------------------------------------------------------------------------------------------------------------------------------------------------------------------------------------------------------------------------------------------------------------------------------------------------------------------------------------------------------------------------------------------------------------------------------------------------------------------------------------------------------------------------------------------------------------------------------------------------------------------------------------------------------------------------------------------------------------------------------------------------------------------------------------------------------------------------------------------------|
|                 | <p>limb*))<br/> <b>AND</b><br/>         ((DE "Lifestyle" OR DE "Behavior" OR DE "Active Living" OR DE "Lifestyle Changes" OR DE "Activity Level" OR DE "Habits" OR DE "Behavior Change" OR DE "Readiness to Change" OR DE "Stages of Change" OR DE "Illness Behavior" OR DE "Health Behavior" OR DE "Health Attitudes" OR TI(Life style* OR Lifestyle* OR Behavior* OR Behaviour* OR Habit* OR Risk reduction* OR Early therap* OR Secondary prevention* OR Tertiary prevention* OR Disease prevention*) OR AB(Life style* OR Lifestyle* OR Behavior* OR Behaviour* OR Habit* OR Risk reduction* OR Early therap* OR Secondary prevention* OR Tertiary prevention* OR Disease prevention*)) OR (DE "Exercise" OR DE "Movement Therapy" OR DE "Sports" OR DE "Aerobic Exercise" OR DE "Physical Activity" OR DE "Physical Fitness" OR DE "Rehabilitation" OR DE "Physical Therapy" OR DE "Sedentary Behavior" OR TI(Physical activit* OR Physical training* OR Physical fitness* OR Physical condition* OR Physical therap* OR Physiotherap* OR Exercis* OR Run* OR Jog* OR Walk* OR Bicycl* OR Swim* OR Strength* OR Resistance* OR Sport* OR Athletic* OR Train* OR Sedentary) OR AB(Physical activit* OR Physical training* OR Physical fitness* OR Physical condition* OR Physical therap* OR Physiotherap* OR Exercis* OR Run* OR Jog* OR Walk* OR Bicycl* OR Swim* OR Strength* OR Resistance* OR Sport* OR Athletic* OR Train* OR Sedentary)) OR (DE "Nutrition" OR DE "Food" OR DE "Diets" OR DE "Body Weight" OR DE "Weight Control" OR DE "Calories" OR DE "Body Mass Index" OR DE "Overweight" OR DE "Weight Loss" OR DE "Obesity" OR TI(Healthy diet* OR Healthy eating* OR Nutrition* OR Diet* OR Food* OR Weight loss* OR Weight loss program* OR Weight reduction* OR Weight reduction program* OR Body weight* OR Overweight* OR Obesity* OR Overnutrition* OR Hypernutrition*) OR AB(Healthy diet* OR Healthy eating* OR Nutrition* OR Diet* OR Food* OR Weight loss* OR Weight loss program* OR Weight reduction* OR Weight reduction program* OR Body weight* OR Overweight* OR Obesity* OR Overnutrition* OR Hypernutrition*))<br/> <b>AND</b><br/>         (DE "Attitudes" OR DE "Motivation" OR DE "Health Personnel Attitudes" OR DE "Therapist Attitudes" OR DE "Psychologist Attitudes" OR DE "Extrinsic Motivation" OR DE "Intrinsic Motivation" OR TI(Barrier* OR Facilitator* OR Enabler* OR Driver* OR Motivat* OR Opinion* OR View* OR Attitude* OR Expectation* OR Incentive* OR Disincentive* OR Belief* OR Influencing factor* OR Experience* OR Perspective* OR Perception* OR Hinder* OR Impediment* OR Obstacle*) OR AB(Barrier* OR Facilitator* OR Enabler* OR Driver* OR Motivat* OR Opinion* OR View* OR Attitude* OR Expectation* OR Incentive* OR Disincentive* OR Belief* OR Influencing factor* OR Experience* OR Perspective* OR Perception* OR Hinder* OR Impediment* OR Obstacle*))</p> |
| #2<br>(14 hits) | #1 AND RD 20190101-                                                                                                                                                                                                                                                                                                                                                                                                                                                                                                                                                                                                                                                                                                                                                                                                                                                                                                                                                                                                                                                                                                                                                                                                                                                                                                                                                                                                                                                                                                                                                                                                                                                                                                                                                                                                                                                                                                                                                                                                                                                                                                                                                                                                                                                                                                                                                                                                                                                                                                                                                                                                                                                                                                                                                                                                                                                                                                                  |

The Cochrane Library

|                  |                                                                                                                                                                                                                                                                                                                                                                                                                                                                                                                                                                                                                                                                                                                                                                                                                                                                                                                                                                                                                              |
|------------------|------------------------------------------------------------------------------------------------------------------------------------------------------------------------------------------------------------------------------------------------------------------------------------------------------------------------------------------------------------------------------------------------------------------------------------------------------------------------------------------------------------------------------------------------------------------------------------------------------------------------------------------------------------------------------------------------------------------------------------------------------------------------------------------------------------------------------------------------------------------------------------------------------------------------------------------------------------------------------------------------------------------------------|
| #1<br>(299 hits) | <p>((Health personnel* OR Health professional* OR Medical staff* OR Clinician* OR Medical specialist* OR Health care* OR Healthcare* OR Primary care* OR Secondary care* OR Allied health personnel* OR Allied health professional* OR Paramedic* OR Nurse* OR Nursing staff* OR Nurse practit* OR Physician assistant* OR Physicians assistant* OR Nutritionist* OR Dietician* OR Dietitian* OR Physical therapist* OR Physiotherapist* OR Lifestyle coach* OR Lifestyle counselor* OR Physician* OR Orthopedic surgeon* OR Orthopedist* OR General practitioner* OR General practice* OR Psychologist*)<br/> <b>AND</b><br/>         (Osteoarthritis* OR Osteoarthro* OR Degenerative arthritis*) AND (Hip* OR Cox* OR Acetabulofemoral joint* OR Knee* OR Superior tibulofibular joint* OR Patellofemoral* OR Lower extremity* OR Lower limb*)<br/> <b>AND</b><br/>         ((Life style* OR Lifestyle* OR Behavior* OR Behaviour* OR Habit* OR Risk reduction* OR Early therap* OR Secondary prevention* OR Tertiary</p> |
|------------------|------------------------------------------------------------------------------------------------------------------------------------------------------------------------------------------------------------------------------------------------------------------------------------------------------------------------------------------------------------------------------------------------------------------------------------------------------------------------------------------------------------------------------------------------------------------------------------------------------------------------------------------------------------------------------------------------------------------------------------------------------------------------------------------------------------------------------------------------------------------------------------------------------------------------------------------------------------------------------------------------------------------------------|

|                  |                                                                                                                                                                                                                                                                                                                                                                                                                                                                                                                                                                                                                                                                                                                                                                                                                                                                      |
|------------------|----------------------------------------------------------------------------------------------------------------------------------------------------------------------------------------------------------------------------------------------------------------------------------------------------------------------------------------------------------------------------------------------------------------------------------------------------------------------------------------------------------------------------------------------------------------------------------------------------------------------------------------------------------------------------------------------------------------------------------------------------------------------------------------------------------------------------------------------------------------------|
|                  | <p>prevention* OR Disease prevention*) OR (Physical activit* OR Physical training* OR Physical fitness* OR Physical condition* OR Physical therap* OR Physiotherap* OR Exercis* OR Run* OR Jog* OR Walk* OR Bicycl* OR Swim* OR Strength* OR Resistance* OR Sport* OR Athletic* OR Train* OR Sedentary) OR (Healthy diet* OR Healthy eating* OR Nutrition* OR Diet* OR Food* OR Weight loss* OR Weight loss program* OR Weight reduction* OR Weight reduction program* OR Body weight* OR Overweight* OR Obesity* OR Overnutrition* OR Hypernutrition*))</p> <p><b>AND</b></p> <p>(Barrier* OR Facilitator* OR Enabler* OR Driver* OR Motivat* OR Opinion* OR View* OR Attitude* OR Expectation* OR Incentive* OR Disincentive* OR Belief* OR Influencing factor* OR Experience* OR Perspective* OR Perception* OR Hinder* OR Impediment* OR Obstacle*);ti,ab,kw</p> |
| #2<br>(632 hits) | #1                                                                                                                                                                                                                                                                                                                                                                                                                                                                                                                                                                                                                                                                                                                                                                                                                                                                   |

For peer review only

Supplemental File 2. Quality assessment of the included studies based on the Mixed Methods Appraisal Tool<sup>a</sup>

| Reference <sup>b</sup>          | Screening questions <sup>c</sup> |    | 1. Qualitative <sup>d</sup> |     |     |     |     | 4. Quantitative descriptive <sup>e</sup> |     |     |     |     | 5. Mixed-methods <sup>f</sup> |     |     |     |     |
|---------------------------------|----------------------------------|----|-----------------------------|-----|-----|-----|-----|------------------------------------------|-----|-----|-----|-----|-------------------------------|-----|-----|-----|-----|
|                                 | S1                               | S2 | 1.1                         | 1.2 | 1.3 | 1.4 | 1.5 | 4.1                                      | 4.2 | 4.3 | 4.4 | 4.5 | 5.1                           | 5.2 | 5.3 | 5.4 | 5.5 |
| Allison (2019) [26]             | +                                | +  | +                           | +   | ?   | +   | +   |                                          |     |     |     |     |                               |     |     |     |     |
| Bossen (2016) [27] <sup>g</sup> | +                                | +  | ?                           | +   | ?   | -   | ?   |                                          |     |     |     |     |                               |     |     |     |     |
| Christiansen (2020) [28]        | +                                | +  | ?                           | +   | ?   | +   | +   |                                          |     |     |     |     |                               |     |     |     |     |
| Davis (2018) [29]               | +                                | +  | ?                           | +   | ?   | -   | ?   |                                          |     |     |     |     |                               |     |     |     |     |
| De Rooij (2014) [30]            | +                                | +  | ?                           | +   | ?   | -   | ?   |                                          |     |     |     |     |                               |     |     |     |     |
| Egerton (2017) [31]             | +                                | +  | ?                           | +   | ?   | +   | +   |                                          |     |     |     |     |                               |     |     |     |     |
| Egerton (2018) [32]             | +                                | +  | ?                           | +   | ?   | +   | +   |                                          |     |     |     |     |                               |     |     |     |     |
| Hinman (2016) [33]              | +                                | +  | +                           | +   | +   | +   | +   |                                          |     |     |     |     |                               |     |     |     |     |
| Hinman (2017) [34]              | +                                | +  | ?                           | +   | ?   | +   | +   |                                          |     |     |     |     |                               |     |     |     |     |
| Knoop (2020) [35]               | +                                | +  | ?                           | +   | ?   | -   | ?   |                                          |     |     |     |     |                               |     |     |     |     |
| Law (2019) [36]                 | +                                | +  | ?                           | +   | ?   | +   | +   |                                          |     |     |     |     |                               |     |     |     |     |
| Lawford (2019) [37]             | +                                | +  | ?                           | +   | ?   | +   | +   |                                          |     |     |     |     |                               |     |     |     |     |
| Lawford (2020) [38]             | +                                | +  | ?                           | +   | ?   | +   | +   |                                          |     |     |     |     |                               |     |     |     |     |
| Lawford (2021) [39]             | +                                | +  | ?                           | +   | ?   | +   | +   |                                          |     |     |     |     |                               |     |     |     |     |
| MacKay (2018) [40]              | +                                | +  | ?                           | +   | ?   | +   | +   |                                          |     |     |     |     |                               |     |     |     |     |
| MacKay (2020) [41]              | +                                | +  | ?                           | +   | ?   | +   | +   |                                          |     |     |     |     |                               |     |     |     |     |
| Mann (2011) [42]                | +                                | +  | ?                           | +   | ?   | +   | +   |                                          |     |     |     |     |                               |     |     |     |     |
| Miller (2020) [43]              | +                                | +  | ?                           | +   | ?   | -   | +   |                                          |     |     |     |     |                               |     |     |     |     |
| Nielsen (2014) [44]             | +                                | +  | ?                           | +   | ?   | +   | +   |                                          |     |     |     |     |                               |     |     |     |     |
| Okwera (2019) [45]              | +                                | +  | ?                           | +   | ?   | +   | +   |                                          |     |     |     |     |                               |     |     |     |     |
| Poitras (2010) [46]             | +                                | +  | ?                           | +   | ?   | -   | +   |                                          |     |     |     |     |                               |     |     |     |     |
| Rosemann (2006) [47]            | +                                | +  | ?                           | +   | ?   | -   | ?   |                                          |     |     |     |     |                               |     |     |     |     |
| Selten (2017) [48]              | +                                | +  | ?                           | +   | ?   | +   | +   |                                          |     |     |     |     |                               |     |     |     |     |
| Tang (2020) [49]                | +                                | +  | ?                           | +   | ?   | +   | +   |                                          |     |     |     |     |                               |     |     |     |     |
| Teo (2020) [50]                 | +                                | +  | ?                           | +   | ?   | +   | +   |                                          |     |     |     |     |                               |     |     |     |     |
| Wallis (2020) [51]              | +                                | +  | ?                           | +   | ?   | +   | +   |                                          |     |     |     |     |                               |     |     |     |     |
| Cottrell (2016) [52]            | +                                | +  |                             |     |     |     |     | +                                        | +   | +   | -   | +   |                               |     |     |     |     |
| Duarte (2019) [53]              | +                                | +  |                             |     |     |     |     | +                                        | ?   | +   | +   | ?   |                               |     |     |     |     |
| Hill (2018) [54]                | +                                | +  |                             |     |     |     |     | +                                        | ?   | +   | -   | +   |                               |     |     |     |     |
| Hill (2018) [55]                | +                                | +  |                             |     |     |     |     | -                                        | ?   | +   | ?   | +   |                               |     |     |     |     |
| Hofstede (2016) [56]            | +                                | +  |                             |     |     |     |     | +                                        | ?   | +   | -   | +   |                               |     |     |     |     |
| Lawford (2018) [57]             | +                                | +  |                             |     |     |     |     | +                                        | ?   | +   | ?   | +   |                               |     |     |     |     |

|                      |   |   |   |   |   |   |   |   |   |   |   |   |   |   |   |   |   |
|----------------------|---|---|---|---|---|---|---|---|---|---|---|---|---|---|---|---|---|
| Reid (2014) [58]     | + | + |   |   |   |   |   | + | ? | + | - | + |   |   |   |   |   |
| De Rooij (2020) [59] | + | + | ? | + | ? | - | ? | + | ? | + | + | + | ? | + | ? | + | - |
| Holden (2009) [60]   | + | + | ? | + | ? | + | + | + | ? | + | - | + | + | + | + | + | - |
| Kloek (2020) [61]    | + | + | ? | + | ? | + | + | + | ? | + | - | + | + | + | ? | - | - |

<sup>a</sup> + = yes; - = no, ? = can't tell

<sup>b</sup> The numbers in brackets ('[...]') correspond to the reference numbers used in the main text of the manuscript.

<sup>c</sup> S1 = Are there clear research questions?; S2 = Do the collected data allow to address the research questions?

<sup>d</sup> 1.1 = Is the qualitative approach appropriate to answer the research question?; 1.2 = Are the qualitative data collection methods adequate to address the research question?; 1.3 = Are the findings adequately derived from the data?; 1.4 = Is the interpretation of results sufficiently substantiated by data?; 1.5 = Is there coherence between qualitative data sources, collection, analysis and interpretation?

<sup>e</sup> 4.1 = Is the sampling strategy relevant to address the research question?; 4.2 = Is the sample representative of the target population?; 4.3 = Are the measurements appropriate?; 4.4 = Is the risk of nonresponse bias low?; 4.5 = Is the statistical analysis appropriate to answer the research question?

<sup>f</sup> 5.1 = Is there an adequate rationale for using a mixed methods design to address the research question?; 5.2 = Are the different components of the study effectively integrated to answer the research question?; 5.3 = Are the outputs of the integration of qualitative and quantitative components adequately interpreted?; 5.4 = Are divergences and inconsistencies between quantitative and qualitative results adequately addressed?; 5.5 = Do the different components of the study adhere to the quality criteria of each tradition of the methods involved?

<sup>g</sup> The MMAT was only applied to the section regarding the pilot study on the feasibility of the blended intervention.



### Supplemental File 3. Full overview of all extracted factors per domain

#### Explanation

- In the tables below, all extracted factors per subcategory of each domain are presented. The colors of the subcategories correspond to barriers (red), facilitators (green) or unclear factors (orange).
- Column “Description”: (\*) at the end of the description indicates that the factor is derived from a close-ended question or attitude statement.
- Column “Reference”: the numbers in brackets (‘[...]’) correspond to the reference numbers used in the main text of the manuscript.
- Abbreviations: ACSM: American College of Sports Medicine; BMI: body mass index; CBT: cognitive behavioral therapy; CKP: chronic knee pain; CPG: clinical practice guideline; GP: general practitioner; HCP: healthcare professional; LI: lifestyle intervention; LMP: Lifestyle Management Programme; NSAID: non-steroidal anti-inflammatory drug; NWBE: non-weight bearing quadriceps strengthening exercise; OA: osteoarthritis; PCST: pain coping skills training; PT: physiotherapist; RCT: randomized controlled trial; TKA: total knee arthroplasty; TJA: total joint arthroplasty; WBE: weight bearing functional exercise.

#### Domain 1: Intervention factors

##### Effectiveness

| Description                                                                                                          | Reference                |
|----------------------------------------------------------------------------------------------------------------------|--------------------------|
| LI have little or no effect on OA (barrier)                                                                          |                          |
| Not certain that exercise works                                                                                      | Christiansen (2020) [28] |
| Advice to exercise and lose weight does not work                                                                     | Egerton (2017) [31]      |
| Dubious about effect of exercise and weight-management advice on reducing symptoms                                   | Egerton (2018) [32]      |
| Surgical methods have the best outcomes                                                                              | Miller (2020) [43]       |
| Lack of confidence in clinical effectiveness of physiotherapy treatments                                             | Okwera (2019) [45]       |
| Limited impact of weight loss on established knee OA (more effective as a primary prevention strategy)               | Poitras (2010) [46]      |
| Questioning direct relationship between weight and knee OA (numerous other factors associated)                       | Poitras (2010) [46]      |
| Less certain about effectiveness of physical therapy (benefits variable or difficult to prove)                       | Selten (2017) [48]       |
| Increasing the overall activity levels does not/might not stop the knee problem getting worse (*)                    | Cottrell (2016) [52]     |
| There is a paucity of evidence in regards to the effectiveness of physiotherapy treatment for OA hip and/or knee (*) | Reid (2014) [58]         |
| Past experience has shown physiotherapy to be ineffective (*)                                                        | Reid (2014) [58]         |
| Increasing overall activity levels does not/might not stop the knee problem getting worse (*)                        | Holden (2009) [60]       |
| Increasing the strength of the muscles around the knee does not/might not stop the knee problem getting worse (*)    | Holden (2009) [60]       |
| Knee problems are not/might not be improved by general exercise (*)                                                  | Holden (2009) [60]       |
| Potential effects of LIs are difficult to accomplish (barrier)                                                       |                          |
| Weight loss is difficult (multiplicity of factors need to be addressed, often involving change in lifestyle)         | Poitras (2010) [46]      |

|                                                                                                            |                      |
|------------------------------------------------------------------------------------------------------------|----------------------|
| Vicious circle (pain when exercising, people move less/eat more due to frustration/sometimes depression)   | Rosemann (2006) [47] |
| Achieving patient behavior change is difficult (*)                                                         | Cottrell (2016) [52] |
| Human nature (as patient-centered barrier to adherence)                                                    | Holden (2009) [60]   |
| LIs have positive effects on affected joint(s) (facilitator)                                               |                      |
| Functional improvements experienced by patients                                                            | Hinman (2017) [34]   |
| Improvements in patient pain and function                                                                  | Lawford (2019) [37]  |
| Large improvements in knee pain                                                                            | Lawford (2021) [39]  |
| Treatment could improve clients' symptoms (e.g. reduce pain, increase function)                            | MacKay (2018) [40]   |
| Treatment could potentially slow progression of symptoms                                                   | MacKay (2018) [40]   |
| Improve people's symptoms early in treatment (to gain buy-in)                                              | MacKay (2020) [41]   |
| Benefits of activity on knee mobility                                                                      | Poitras (2010) [46]  |
| Activity necessary for the knee's health                                                                   | Poitras (2010) [46]  |
| Weight loss improves pain and joint function                                                               | Poitras (2010) [46]  |
| Benefits of weight reduction for relieving symptoms of knee/hip OA                                         | Selten (2017) [48]   |
| Beneficial effects of physical therapy in reducing pain/stiffness and potential effects on cartilage       | Selten (2017) [48]   |
| Exercise therapy may be effective by giving more muscular support for joints                               | Wallis (2020) [51]   |
| Knee problems are improved by quadriceps strengthening exercises (*)                                       | Cottrell (2016) [52] |
| Knee problems are improved by general exercise (e.g. walking or swimming) (*)                              | Cottrell (2016) [52] |
| Increasing the strength of the muscles around the knee stops the knee problem getting worse (*)            | Cottrell (2016) [52] |
| Exercise is beneficial for OA (*)                                                                          | Lawford (2018) [57]  |
| Knee problems are improved by local strengthening exercises (*)                                            | Holden (2009) [60]   |
| LIs have positive effects on general health (facilitator)                                                  |                      |
| Lifestyle treatments benefited other chronic conditions                                                    | Egerton (2018) [32]  |
| Rapid weight loss was primary driver of motivation                                                         | Lawford (2021) [39]  |
| Benefits of activity on general wellbeing                                                                  | Poitras (2010) [46]  |
| Weight loss effective at improving mobility in general                                                     | Poitras (2010) [46]  |
| Weight loss also benefits mobility in general                                                              | Poitras (2010) [46]  |
| Beneficial effects of physical therapy in reducing weight and for increasing mobility/posture/coordination | Selten (2017) [48]   |
| Community interventions are effective at achieving sufficient and sustained weight loss (*)                | Hill (2018) [55]     |
| Patients benefit from weight loss (*)                                                                      | Hofstede (2016) [56] |
| LIs have positive mental effects (facilitator)                                                             |                      |
| Enthusiastic about the program and described the results (e.g. it was empowering)                          | Davis (2018) [29]    |
| Greater confidence to exercise among patients                                                              | Hinman (2017) [34]   |
| Reminding patients of opportunity to self-manage                                                           | Law (2019) [36]      |
| Increased confidence to self-manage                                                                        | Lawford (2019) [37]  |
| Positive lifestyle changes (patients) (e.g. thinking differently)                                          | Lawford (2021) [39]  |
| Physical therapy useful in increasing patients self-management in coping with/acceptance of symptoms       | Selten (2017) [48]   |

|                                                                                                          |                      |
|----------------------------------------------------------------------------------------------------------|----------------------|
| Exercise therapy may be effective by giving opportunity to improve confidence about activities/mobility  | Wallis (2020) [51]   |
| Non-surgical treatments motivate patients to do things themselves (*)                                    | Hofstede (2016) [56] |
| LIs have positive effects (not further specified) (facilitator)                                          |                      |
| Positive impact on patients of personalized attention from coach and from advice/education they provided | Hinman (2016) [33]   |
| Emphasising health benefits of programme                                                                 | Law (2019) [36]      |
| Physical therapy helpful for patients most of the time                                                   | Miller (2020) [43]   |
| Value of lifestyle advice related to knee and hip OA                                                     | Selten (2017) [48]   |
| Non-pharmacological, non-surgical treatment was considered useful to delay surgery                       | Selten (2017) [48]   |
| Positive about program (alternative approach and opportunity to avoid a joint replacement)               | Wallis (2020) [51]   |
| Improvement in the physical condition of participants                                                    | Duarte (2019) [53]   |
| Good results of physical therapy (*)                                                                     | Hofstede (2016) [56] |

### Safety

| Description                                                                                                           | Reference            |
|-----------------------------------------------------------------------------------------------------------------------|----------------------|
| LIs are unsafe or have negative effects (barrier)                                                                     |                      |
| Being apprehensive about aggravating pain in patients                                                                 | Lawford (2020) [38]  |
| Tending to avoid pushing patients in usual clinical practice                                                          | Lawford (2020) [38]  |
| Potential further damage to the knee due to activity                                                                  | Poitras (2010) [46]  |
| Urging caution to patients about participating in higher impact exercise/activities                                   | Wallis (2020) [51]   |
| Fear of increasing symptoms (as barrier to prescribing exercise)                                                      | Holden (2009) [60]   |
| Causing disease progression, particularly through weight-bearing activities (as barrier to prescribing exercise)      | Holden (2009) [60]   |
| Exacerbating patient's comorbidities (as barrier to prescribing exercise)                                             | Holden (2009) [60]   |
| General exercise is not/might not be safe for everybody to do (*)                                                     | Holden (2009) [60]   |
| Local strengthening exercises for the knee are not/might not be safe for everybody to do (*)                          | Holden (2009) [60]   |
| LIs are safe (facilitator)                                                                                            |                      |
| Quadriceps strengthening exercises for the knee are safe for everybody to do (*)                                      | Cottrell (2016) [52] |
| General exercise (e.g. walking or swimming) is safe for everybody to do (*)                                           | Cottrell (2016) [52] |
| Only few drawbacks for the use of non-surgical treatments (*)                                                         | Hofstede (2016) [56] |
| Research environment or protocols provide a safety net (facilitator)                                                  |                      |
| Less afraid to increase training intensity (preventing adverse events by tailoring programs to individual's capacity) | De Rooij (2014) [30] |
| Safety net provided by research environment (e.g. patients were previously screened for comorbidities/red flags)      | Hinman (2017) [34]   |
| There was a safety net in place with the trial (each patient had been screened)                                       | Lawford (2019) [37]  |
| Experiences in study helped them push patients through more pain than they would have previously                      | Lawford (2020) [38]  |

### Design

| Description                                                                                                       | Reference            |
|-------------------------------------------------------------------------------------------------------------------|----------------------|
| <b>Non-optimal content or structure of LIs (barrier)</b>                                                          |                      |
| Structure/timing of exercise program restricted capacity to modify exercises/provide adequate follow-up           | Hinman (2016) [33]   |
| Maximum number of four sessions was considered too low in many patients                                           | Knoop (2020) [35]    |
| Behavioral approach in exercise therapy and advice to visit GP were considered unnecessary for most patients      | Knoop (2020) [35]    |
| Program factors (e.g. single discipline led intervention)                                                         | Wallis (2020) [51]   |
| Services do not meet expectations (*)                                                                             | Cottrell (2016) [52] |
| E-Exercise does not/might not contain all essential elements for the treatment of hip/knee OA (*)                 | Kloek (2020) [61]    |
| The content of e-Exercise is not/might not be aligned with my opinion about treating patients with OA (*)         | Kloek (2020) [61]    |
| The intervention provided through e-Exercise is not/might not be appropriate for the average patient with OA (*)  | Kloek (2020) [61]    |
| Patients who were treated with e-Exercise were (perhaps) not generally positive about the intervention (*)        | Kloek (2020) [61]    |
| <b>Challenges for patients during participation in LIs (barrier)</b>                                              |                      |
| Mental effort required for WBE program was challenging for patients                                               | Lawford (2020) [38]  |
| Physical challenge was the complexity of WBE program                                                              | Lawford (2020) [38]  |
| Straight leg raise challenging in NWBE program                                                                    | Lawford (2020) [38]  |
| Volume of resources could be overwhelming/confusing for some patients                                             | Lawford (2021) [39]  |
| Difficulty for patients with PCST component (cognitive restructuring techniques)                                  | Nielsen (2014) [44]  |
| <b>Challenges for HCPs during delivery of LIs (barrier)</b>                                                       |                      |
| e-Exercise must be adapted for suitable integration into practice (e.g. no insight into modules patients receive) | Bossen (2016) [27]   |
| Class required intense supervision, which was difficult to provide when most participants were new                | Davis (2018) [29]    |
| Challenges of supervision when space did not allow clear line of sight                                            | Davis (2018) [29]    |
| Challenges associated with cuff weights used to apply resistance in NWBE program                                  | Lawford (2020) [38]  |
| The lay out of the protocol does not/might not facilitate its usage in daily practice (*)                         | De Rooij (2020) [59] |
| Clarity of instruction manual and course (lack of)                                                                | Kloek (2020) [61]    |
| <b>Positive experiences with or suggestions for improving the content or structure of LIs (facilitator)</b>       |                      |
| Positive feedback regarding the content of e-Exercise                                                             | Bossen (2016) [27]   |
| First education session was critical to reducing the participant's anxiety related to exercising                  | Davis (2018) [29]    |
| Importance of empowering the patients rather than 'pushing' them, achieved by 'giving choices'                    | Davis (2018) [29]    |
| Positive comments about the exercise regimen                                                                      | Hinman (2016) [33]   |
| Structure provided by protocol/structure of exercises (how patients included them into daily routine)             | Hinman (2016) [33]   |
| Multidisciplinary nature of LMP (whole-person, intensive and functional approach)                                 | Law (2019) [36]      |
| Standardization was viewed as important for monitoring and evaluation purposes                                    | Law (2019) [36]      |
| Helpful social impact of group-based programme                                                                    | Law (2019) [36]      |
| Long-term follow-up consultations would be beneficial                                                             | Lawford (2021) [39]  |
| Extremely positive about educational resources provided                                                           | Lawford (2021) [39]  |
| More information about healthy eating beyond meal replacement phase could be included                             | Lawford (2021) [39]  |
| Exercise/physical activity program was an important part of intervention                                          | Lawford (2021) [39]  |

|    |                                                                                                                                                   |                      |
|----|---------------------------------------------------------------------------------------------------------------------------------------------------|----------------------|
| 1  | Favorably comments on program content (positive way to help people be proactive about their pain)                                                 | Nielsen (2014) [44]  |
| 2  | Importance of PCST component (cognitive restructuring techniques)                                                                                 | Nielsen (2014) [44]  |
| 3  | Structure of PCST sessions (overview/practice review/covering new skill/practice planning) worked well                                            | Nielsen (2014) [44]  |
| 4  | A more holistic program as part of a multidisciplinary model of service was preferred                                                             | Wallis (2020) [51]   |
| 5  | Value of program's structure and peer (group) support                                                                                             | Wallis (2020) [51]   |
| 6  | Name of program ('Good Life with OsteoArthritis') implied optimism and positive outcome                                                           | Wallis (2020) [51]   |
| 7  | Received positive feedback from their patients about program                                                                                      | Wallis (2020) [51]   |
| 8  | Some contents of the protocol are not/might not be incorrect (*)                                                                                  | De Rooij (2020) [59] |
| 9  | The protocol is applicable to OA patients with comorbidity that I see in my clinical practice (*)                                                 | De Rooij (2020) [59] |
| 10 | Important to extend the intake phase to at least to 45 min                                                                                        | De Rooij (2020) [59] |
| 11 | Completeness of web-based application (exercises/assignments/information)                                                                         | Kloek (2020) [61]    |
| 12 | Perception that e-Exercise is an appropriate treatment option for subgroup of OA patients                                                         | Kloek (2020) [61]    |
| 13 | <b>Ease for patients during participation in LIs (facilitator)</b>                                                                                |                      |
| 14 | NWBE program was generally easier for patients to follow (mental effort)                                                                          | Lawford (2020) [38]  |
| 15 | Simplicity and convenience of meal replacements                                                                                                   | Lawford (2021) [39]  |
| 16 | Providing trial of sessions to assist patients to get started (suggestion for promotion and referrals)                                            | Wallis (2020) [51]   |
| 17 | <b>Ease for HCPs during delivery of LIs (facilitator)</b>                                                                                         |                      |
| 18 | Initial classes needed to be small with rolling recruitment very beneficial                                                                       | Davis (2018) [29]    |
| 19 | List of restrictions for exercise therapy was conveniently arranged checklist for diagnostic and treatment phases                                 | De Rooij (2014) [30] |
| 20 | Suggestion to increase feasibility by reducing the protocols to three main protocols                                                              | De Rooij (2014) [30] |
| 21 | Requirements of treatment protocol freed therapists to notice and reflect on impact of the interventions                                          | Hinman (2016) [33]   |
| 22 | Structured protocol allowed to experience different OA treatment regimen/observe and learn from impact                                            | Hinman (2016) [33]   |
| 23 | NWBE program was easier to prescribe (mental effort)                                                                                              | Lawford (2020) [38]  |
| 24 | Easier to prescribe and progress NWBE than WBE program (physical complexity)                                                                      | Lawford (2020) [38]  |
| 25 | Training workshop as good introduction to content and process of delivering PCST program                                                          | Nielsen (2014) [44]  |
| 26 | Weekly group interaction crucial to being able to deliver intervention effectively/problem-solve issues                                           | Nielsen (2014) [44]  |
| 27 | Input from supervising psychologist crucial to being able to deliver intervention effectively/problem-solve issues                                | Nielsen (2014) [44]  |
| 28 | Would have liked more role-playing experience prior to beginning trial treatments                                                                 | Nielsen (2014) [44]  |
| 29 | Regular group meetings were considered very important (if not essential) for delivery of PCST program                                             | Nielsen (2014) [44]  |
| 30 | Value of having a psychologist involved throughout the program, their professional input was helpful                                              | Nielsen (2014) [44]  |
| 31 | The recommendations over adapting the diagnostic phase (history taking and physical examination) in the protocol are clear and understandable (*) | De Rooij (2020) [59] |
| 32 | The recommendations over adapting the OA exercise therapy in the protocol are clear and understandable (*)                                        | De Rooij (2020) [59] |
| 33 | Useful to plan follow up/refreshment training to repeat/discuss content of course/protocol and application                                        | De Rooij (2020) [59] |
| 34 | Shortening the protocol would increase user-friendliness                                                                                          | De Rooij (2020) [59] |
| 35 | The instruction course and manual assisted me so that I knew how to work with e-Exercise (*)                                                      | Kloek (2020) [61]    |

### *Personalized treatment*

| Description                                                                                                                     | Reference            |
|---------------------------------------------------------------------------------------------------------------------------------|----------------------|
| <b>Insufficient ability to provide personalized treatment within LIs (barrier)</b>                                              |                      |
| Concerned the service would not be able to provide individualized management for a very diverse population                      | Egerton (2017) [31]  |
| Requirements of RCT potentially created a barrier to responding to where the client was                                         | Nielsen (2014) [44]  |
| Less satisfied about the applicability of e-Exercise for only one diagnosis                                                     | Kloek (2020) [61]    |
| I do not/might not have enough influence on the content of patients' individual e-Exercise program (*)                          | Kloek (2020) [61]    |
| <b>Ability and importance of providing personalized treatment within LIs (facilitator)</b>                                      |                      |
| Flexibility was valuable when tackling local participation challenges                                                           | Law (2019) [36]      |
| Tailoring exercise programs to individual patient would overcome some challenges                                                | Lawford (2020) [38]  |
| Tailoring treatment to a person's goals/interests                                                                               | MacKay (2020) [41]   |
| Need to consider personal context by integrating people's home exercises into daily activities/other life demands               | MacKay (2020) [41]   |
| Some modules worked better than others (depending on the individual patient and context)                                        | Nielsen (2014) [44]  |
| The belief that a more flexible approach responsive to patient needs was required in their practice                             | Nielsen (2014) [44]  |
| Exercise programs have to be individualized to each patient by the PT                                                           | Poitras (2010) [46]  |
| Importance of tailored exercise program                                                                                         | Teo (2020) [50]      |
| Exercise for CKP is most beneficial when it is tailored to meet individual patient needs (*)                                    | Cottrell (2016) [52] |
| A standard set of exercises is not/might not be sufficient for every patient with chronic knee problems (*)                     | Cottrell (2016) [52] |
| The protocol gives the opportunity to make your own decisions regarding history taking, physical examination, and treatment (*) | De Rooij (2020) [59] |
| A standard set of exercises is not/might not be sufficient for every patient with knee OA (*)                                   | Holden (2009) [60]   |
| Exercise for knee OA is most beneficial when it is tailored to meet individual patient needs (*)                                | Holden (2009) [60]   |
| More flexibility in web-based application (intervention duration, number of sets/repetitions, type of exercises)                | Kloek (2020) [61]    |
| More flexibility in intervention (more possibilities to personalize to individual needs)                                        | Kloek (2020) [61]    |

### Accessibility

| Description                                                                                                 | Reference            |
|-------------------------------------------------------------------------------------------------------------|----------------------|
| <b>LIs are unavailable or inaccessible (barrier)</b>                                                        |                      |
| Most of the patients did not meet study inclusion criteria                                                  | Bossen (2016) [27]   |
| Lack of availability of support services (e.g. community-based rehabilitation programs) in remote locations | Egerton (2018) [32]  |
| Long waiting lists for support services (e.g. community-based rehabilitation programs)                      | Egerton (2018) [32]  |
| Lack of infrastructure or local programmes (particularly in rural settings)                                 | MacKay (2018) [40]   |
| Clients often had a waiting period before accessing care                                                    | MacKay (2018) [40]   |
| Lack of facilities to promote continuing exercise in community                                              | Mann (2011) [42]     |
| Wait for physiotherapy was too long                                                                         | Mann (2011) [42]     |
| Inaccessible treatment options within organization                                                          | Miller (2020) [43]   |
| Limitations to accessing services (e.g. lack of facilities, costs) (*)                                      | Cottrell (2016) [52] |

|    |                                                                                                                 |                      |
|----|-----------------------------------------------------------------------------------------------------------------|----------------------|
| 1  | Weight management services are not/might not be adequately commissioned in my area (*)                          | Hill (2018) [55]     |
| 2  | Lack of availability of physiotherapy                                                                           | Reid (2014) [58]     |
| 3  | Poor links to community facilities such as local leisure centres                                                | Holden (2009) [60]   |
| 4  | Costs of LIs to patients (barrier)                                                                              |                      |
| 5  | Concern that uptake would be negatively impacted if patients were required to pay                               | Egerton (2017) [31]  |
| 6  | Concerns regarding financial cost to patients when considering referral to other services                       | Egerton (2018) [32]  |
| 7  | Cost was a factor in whether clients could access facilities/programmes                                         | MacKay (2018) [40]   |
| 8  | Costs to patients (lack of insurance coverage/high co-pays for specific services/time off work/travel expenses) | Miller (2020) [43]   |
| 9  | Costs (extrinsic barrier for patient adherence)                                                                 | Teo (2020) [50]      |
| 10 | Cost (program access barrier)                                                                                   | Wallis (2020) [51]   |
| 11 | LIs are not feasible or sustainable (barrier)                                                                   |                      |
| 12 | Concern for overcomplicated system when service is not compatible/complementary with existing initiatives       | Egerton (2017) [31]  |
| 13 | Not seeing need (already adequate skills/resources to support OA patient self-management and lifestyle change)  | Egerton (2017) [31]  |
| 14 | Not seeing need (advice already given at their practice would be unhelpfully repeated)                          | Egerton (2017) [31]  |
| 15 | Concern regarding long-term service sustainability                                                              | Egerton (2017) [31]  |
| 16 | The addition of a care support team may add complexities to management                                          | Egerton (2017) [31]  |
| 17 | In my daily clinical practice I can (perhaps) not integrate working according to the protocol well (*)          | De Rooij (2020) [59] |
| 18 | I do not/might not treat enough patients with knee OA and comorbidity to apply the protocol (*)                 | De Rooij (2020) [59] |
| 19 | The protocol does not/might not fit well with my working methods of daily clinical practice (*)                 | De Rooij (2020) [59] |
| 20 | Total amount of knee OA patients with comorbidity was lower than expected                                       | De Rooij (2020) [59] |
| 21 | Inconvenience to patients when accessing LIs (barrier)                                                          |                      |
| 22 | Weather (extrinsic barrier for patient adherence)                                                               | Teo (2020) [50]      |
| 23 | Transport, waiting time and parking related to attendance (program access barrier)                              | Wallis (2020) [51]   |
| 24 | Geography (program access barrier)                                                                              | Wallis (2020) [51]   |
| 25 | Available session times (program access barrier)                                                                | Wallis (2020) [51]   |
| 26 | Geographical problems (e.g. remote location, scared to walk in local area) (*)                                  | Cottrell (2016) [52] |
| 27 | LIs are available or accessible, or suggestions for improvement (facilitator)                                   |                      |
| 28 | More likely to engage with the care support team if it enabled more affordable/accessible allied health         | Egerton (2017) [31]  |
| 29 | LMP would benefit from extension of inclusion criteria (patients with less severe OA and lower BMI)             | Law (2019) [36]      |
| 30 | Benefits of having infrastructure and programmes available in their communities                                 | MacKay (2018) [40]   |
| 31 | Triage service (as suggestion for physiotherapy service improvement)                                            | Okwera (2019) [45]   |
| 32 | A web-based physiotherapy service (as suggestion for physiotherapy service improvement)                         | Okwera (2019) [45]   |
| 33 | Reduced waiting times (as suggestion for physiotherapy service improvement)                                     | Okwera (2019) [45]   |
| 34 | Availability of non-surgical treatments (*)                                                                     | Hofstede (2016) [56] |
| 35 | Good access to physiotherapy in area (*)                                                                        | Reid (2014) [58]     |
| 36 | LIs are feasible or sustainable (facilitator)                                                                   |                      |
| 37 | Need for clarity about how the new service would integrate with existing schemes and payment structures         | Egerton (2017) [31]  |
| 38 |                                                                                                                 |                      |
| 39 |                                                                                                                 |                      |
| 40 |                                                                                                                 |                      |
| 41 |                                                                                                                 |                      |
| 42 |                                                                                                                 |                      |
| 43 |                                                                                                                 |                      |
| 44 |                                                                                                                 |                      |
| 45 |                                                                                                                 |                      |
| 46 |                                                                                                                 |                      |

|                                                                                                                                                       |                      |
|-------------------------------------------------------------------------------------------------------------------------------------------------------|----------------------|
| Seeing need (advice/recommendations may need to be reinforced/provided over several health care episodes)                                             | Egerton (2017) [31]  |
| Seeing need (extra time and encouragement for the patient would result in better outcomes)                                                            | Egerton (2017) [31]  |
| Importance of broad acceptance (patients/doctors/health service funders) if new service is to continue long term                                      | Egerton (2017) [31]  |
| Model of stratified care easy to apply and having added value for daily practice                                                                      | Knoop (2020) [35]    |
| Appreciation of applicability of treatment protocols                                                                                                  | Knoop (2020) [35]    |
| Further and ongoing evaluation of the LMP would help to address current challenges                                                                    | Law (2019) [36]      |
| Interventions in physical therapists' toolbox were not static (changed over time)                                                                     | MacKay (2020) [41]   |
| The protocol is feasible in daily clinical practice (*)                                                                                               | De Rooij (2020) [59] |
| In my daily clinical practice, I work with sufficient equipment (including blood pressure meter, saturation meter) to properly apply the protocol (*) | De Rooij (2020) [59] |
| I have changed my working method (due to the protocol) (*)                                                                                            | De Rooij (2020) [59] |
| Intake procedure is feasible and implementable                                                                                                        | De Rooij (2020) [59] |
| The more you apply the strategy in daily practice, the easier it is to integrate it in your daily working method                                      | De Rooij (2020) [59] |
| <b>Convenience for patients when accessing LIs (facilitator)</b>                                                                                      |                      |
| Close, convenient locations (suggestion for promotion and referrals)                                                                                  | Wallis (2020) [51]   |
| Appropriate session times for working populations (suggestion for promotion and referrals)                                                            | Wallis (2020) [51]   |
| Provision of free parking at health service (suggestion for promotion and referrals)                                                                  | Wallis (2020) [51]   |

### Telehealth

| Description                                                                                                                     | Reference           |
|---------------------------------------------------------------------------------------------------------------------------------|---------------------|
| <b>Disadvantages of telehealth in terms of effectiveness (barrier)</b>                                                          |                     |
| Remote (telephone) delivery is not as good as face-to-face particularly in relation to exercise advice                          | Egerton (2017) [31] |
| Inability of a remote service to provide locally relevant information                                                           | Egerton (2017) [31] |
| An exercise program prescribed by a PT over the telephone would not/might not improve a patient's OA (*)                        | Lawford (2018) [57] |
| I do not/might not experience that e-Exercise supports patients in doing their exercises at home (*)                            | Kloek (2020) [61]   |
| <b>Telehealth is not safe for patients or patient/data privacy (barrier)</b>                                                    |                     |
| Concerns about security of patient data and information confidentiality during the referral process                             | Egerton (2017) [31] |
| Using the telephone would not/might not be a safe way for patients to receive a PT-prescribed exercise program for their OA (*) | Lawford (2018) [57] |
| <b>Challenges for HCPs regarding lack of physical/visual contact (barrier)</b>                                                  |                     |
| Forced to modify usual habits/rely more on information shared by patients (instead of own physical assessment)                  | Hinman (2017) [34]  |
| Some discomfort without hands-on assessment (no palpation of patient's knee/hands-on facilitation of exercises)                 | Hinman (2017) [34]  |
| Assessment of patients could be difficult when consulting via telephone (inability to observe)                                  | Lawford (2019) [37] |
| Lack of visual/physical contact would limit strategies available when teaching patients an exercise program                     | Lawford (2019) [37] |
| I would not/might not be able to adequately monitor a patient's OA over the telephone (*)                                       | Lawford (2018) [57] |
| I do not/might not like that there would be no physical contact with an OA patient when consulting over the telephone (*)       | Lawford (2018) [57] |
| I do not/might not like that there would be no physical contact with an OA patient when consulting over the internet video (*)  | Lawford (2018) [57] |
| Reduced face-to-face contact interfered with professional autonomy                                                              | Kloek (2020) [61]   |



|                                                                                                                                                            |                     |
|------------------------------------------------------------------------------------------------------------------------------------------------------------|---------------------|
| <b>Other challenges for HCPs regarding feasibility of telehealth (barrier)</b>                                                                             |                     |
| Lack of financial incentive if blended intervention substitutes conventional visits (reduced venues per patient)                                           | Bossen (2016) [27]  |
| Hesitancy to embrace an unfamiliar new service                                                                                                             | Egerton (2017) [31] |
| Patient flexibility could come at a cost to the therapist sometimes (allowed patients to reschedule last minute)                                           | Hinman (2017) [34]  |
| Skype consultations more suitable as adjunctive to usual in-clinic care (initial assessment in person preferred)                                           | Hinman (2017) [34]  |
| Telephone not viewed as primary mode of providing care (only for follow-up)                                                                                | Lawford (2019) [37] |
| Some difficulty scheduling telephone consultations during usual day of face-to-face consultations                                                          | Lawford (2019) [37] |
| Using the telephone to consult with an OA patient and prescribe an exercise program would not/might not be easy for me (*)                                 | Lawford (2018) [57] |
| I would not/might not be as satisfied talking to an OA patient over the telephone as I would be talking to the patient in person in my consulting room (*) | Lawford (2018) [57] |
| I would not/might not be interested in being involved in a service offering PT-prescribed exercise over the telephone for my people with OA (*)            | Lawford (2018) [57] |
| Using the telephone would not/might not be an acceptable way for me to deliver an exercise program to patients with OA (*)                                 | Lawford (2018) [57] |
| Using the telephone would not/might not be a useful (practical) way for me to deliver an exercise program to patients with OA (*)                          | Lawford (2018) [57] |
| Using the telephone would not/might not be an effective way for me to deliver an exercise program to patients with OA (*)                                  | Lawford (2018) [57] |
| Technical skills (lack of)                                                                                                                                 | Kloek (2020) [61]   |
| Adaptive capacity to change treatment routines (lack of)                                                                                                   | Kloek (2020) [61]   |
| Absence of national e-Health guideline or standard                                                                                                         | Kloek (2020) [61]   |
| Loss of income due to substitution of face-to-face session                                                                                                 | Kloek (2020) [61]   |
| <b>Patient-related challenges regarding feasibility of telehealth (barrier)</b>                                                                            |                     |
| Most of the patients prefer traditional face-to-face treatments                                                                                            | Bossen (2016) [27]  |
| Hearing and cognitive difficulties as barriers for some patients to being able to interact with the service                                                | Egerton (2017) [31] |
| Skepticism about whether many patients would embrace such a model (i.e. because of remote-delivery aspect)                                                 | Egerton (2017) [31] |
| Lack of technology affinity (reason for patients' non-willingness to participate in e-Exercise)                                                            | Kloek (2020) [61]   |
| Patients preferred regular face-to-face contact                                                                                                            | Kloek (2020) [61]   |
| <b>Negative aspects regarding communication and relationship using telehealth (barrier)</b>                                                                |                     |
| Lack of face-to-face contact difficult/hindered ability to establish rapport/build effective relationships                                                 | Hinman (2016) [33]  |
| Occasional technical difficulties (e.g. poor internet connection) could disrupt the flow of the consultation                                               | Hinman (2017) [34]  |
| Relationships with patients might be adversely impacted/could be difficult to develop rapport                                                              | Lawford (2019) [37] |
| Difficulties communicating might be experienced when consulting via telephone                                                                              | Lawford (2019) [37] |
| Video consultations made it more difficult to have emotional conversations/read non-verbal cues                                                            | Lawford (2021) [39] |
| <b>Benefits of telehealth in terms of effectiveness (facilitator)</b>                                                                                      |                     |
| Possibility to extend physical therapy treatment in patient's home environment                                                                             | Bossen (2016) [27]  |
| Potential to enhance the adherence of home exercises                                                                                                       | Bossen (2016) [27]  |
| Empowering effect of home environment on patient adherence with exercise program                                                                           | Hinman (2017) [34]  |
| Using Skype distilled focus to most important and effective treatment elements to facilitate self-management                                               | Hinman (2017) [34]  |
| Patients more relaxed in home environment/more receptive to the information the therapists provided                                                        | Hinman (2017) [34]  |
| Patients could be more comfortable talking about condition/engaging in exercise program from own home                                                      | Lawford (2019) [37] |

|    |                                                                                                                                                   |                     |
|----|---------------------------------------------------------------------------------------------------------------------------------------------------|---------------------|
| 1  | Telephone-delivered care could provide increased opportunities to educate patients about OA                                                       | Lawford (2019) [37] |
| 2  | Patient adherence to telephone-delivered exercise program was high                                                                                | Lawford (2019) [37] |
| 3  | An exercise program prescribed by a PT over the internet video would improve a patient's OA (*)                                                   | Lawford (2018) [57] |
| 4  | Added value in terms of exercise adherence (important factor to use web-based application)                                                        | Kloek (2020) [61]   |
| 5  | 7 Telehealth is safe for patients or patient/data privacy (facilitator)                                                                           |                     |
| 6  | Home environment facilitated correct and safe exercise techniques                                                                                 | Hinman (2017) [34]  |
| 7  | A patient's privacy would not be violated if I prescribed them an exercise program over the telephone (*)                                         | Lawford (2018) [57] |
| 8  | A patient's privacy would not be violated if I prescribed them an exercise program over the internet video (*)                                    | Lawford (2018) [57] |
| 9  | Using the internet video would be a safe way for patients to receive a PT-prescribed exercise program for their OA (*)                            | Lawford (2018) [57] |
| 10 | I believe that patient data gathered at the e-Exercise web-application is stored safely (*)                                                       | Kloek (2020) [61]   |
| 11 | 13 Lack of physical/visual contact not a major issue for HCPs (facilitator)                                                                       |                     |
| 12 | Patients responded favorably to the exercises prescribed despite lack of hands-on assessment                                                      | Hinman (2017) [34]  |
| 13 | Hands-off approach was physically less demanding compared to usual care/contributed to sense of satisfaction                                      | Hinman (2017) [34]  |
| 14 | Functional improvements were observable using Skype                                                                                               | Hinman (2017) [34]  |
| 15 | Lack of physical and visual contact less of an issue than anticipated                                                                             | Lawford (2019) [37] |
| 16 | Able to work around the lack of visual contact (erring on the side of caution)                                                                    | Lawford (2019) [37] |
| 17 | I would get a good understanding of a patient's OA over the telephone (*)                                                                         | Lawford (2018) [57] |
| 18 | I would get a good understanding of a patient's OA over the internet video (*)                                                                    | Lawford (2018) [57] |
| 19 | I would be able to adequately monitor a patient's OA over the internet video (*)                                                                  | Lawford (2018) [57] |
| 20 | 22 Positive attitude or needs of HCPs regarding feasibility of telehealth (facilitator)                                                           |                     |
| 21 | Ease of using Skype for consultations                                                                                                             | Hinman (2017) [34]  |
| 22 | Quality of technology suitable for providing instructions/prescribing exercises/receiving instantaneous feedback                                  | Hinman (2017) [34]  |
| 23 | More effective communication skills would be needed to consult via telephone                                                                      | Lawford (2019) [37] |
| 24 | It would be necessary to provide patients with pictures or videos of each exercise when consulting via telephone                                  | Lawford (2019) [37] |
| 25 | Experiences providing telephone-delivered care exceeded expectations, resulting in new enthusiasm                                                 | Lawford (2019) [37] |
| 26 | Written materials provided to patients helped to prescribe exercises effectively                                                                  | Lawford (2019) [37] |
| 27 | Training in communication and/or health coaching important to effectively deliver care over telephone                                             | Lawford (2019) [37] |
| 28 | Video consultations were easy and convenient                                                                                                      | Lawford (2021) [39] |
| 29 | Using the internet video to consult with an OA patient and prescribe an exercise program would be easy for me (*)                                 | Lawford (2018) [57] |
| 30 | I would be as satisfied talking to an OA patient over the internet video as I would be talking to the patient in person in my consulting room (*) | Lawford (2018) [57] |
| 31 | I would be interested in being involved in a service offering PT-prescribed exercise over the internet video for my people with OA (*)            | Lawford (2018) [57] |
| 32 | Using the internet video would be an acceptable way for me to deliver an exercise program to patients with OA (*)                                 | Lawford (2018) [57] |
| 33 | Using the internet video would be a useful (practical) way for me to deliver an exercise program to patients with OA (*)                          | Lawford (2018) [57] |
| 34 | Using the internet video would be an effective way for me to deliver an exercise program to patients with OA (*)                                  | Lawford (2018) [57] |
| 35 | Advantage of reducing number of treatments                                                                                                        | Kloek (2020) [61]   |
| 36 | Offering an innovative intervention attracted new patients                                                                                        | Kloek (2020) [61]   |
| 37 | That it results in less income is not/might not be a major disadvantage of e-Exercise (*)                                                         | Kloek (2020) [61]   |
| 38 |                                                                                                                                                   |                     |
| 39 |                                                                                                                                                   |                     |
| 40 |                                                                                                                                                   |                     |
| 41 |                                                                                                                                                   |                     |
| 42 |                                                                                                                                                   |                     |
| 43 |                                                                                                                                                   |                     |
| 44 |                                                                                                                                                   |                     |
| 45 |                                                                                                                                                   |                     |
| 46 |                                                                                                                                                   |                     |

1  
2  
3  
4  
5  
6  
7  
8  
9  
10  
11  
12  
13  
14  
15  
16  
17  
18  
19  
20  
21  
22  
23  
24  
25  
26  
27  
28  
29  
30  
31  
32  
33  
34  
35  
36  
37  
38  
39  
40  
41  
42  
43  
44  
45  
46

|                                                                                                                                 |                     |
|---------------------------------------------------------------------------------------------------------------------------------|---------------------|
| Our physiotherapy practice has the intention to use e-Health innovations (*)                                                    | Kloek (2020) [61]   |
| <b>Patient-related benefits regarding feasibility of telehealth (facilitator)</b>                                               |                     |
| 24/7 availability of information and exercises                                                                                  | Bossen (2016) [27]  |
| Service could increase access to support for rural patients                                                                     | Egerton (2017) [31] |
| Skype-delivered care convenient for patients (time efficiency/flexibility/access)                                               | Hinman (2017) [34]  |
| Telephone-delivered care would be convenient for patients                                                                       | Lawford (2019) [37] |
| Telephone-delivered care could reduce patient costs associated with accessing physiotherapy services                            | Lawford (2019) [37] |
| Telephone-delivered care could allow wider variety of patients to access physiotherapy                                          | Lawford (2019) [37] |
| Noticeable shift in patients' expectations of physiotherapy care (more willing to self-manage their condition)                  | Lawford (2019) [37] |
| Telephone-delivered care was convenient for patients                                                                            | Lawford (2019) [37] |
| An exercise program prescribed by a PT over the telephone would save a patient money (*)                                        | Lawford (2018) [57] |
| An exercise program prescribed by a PT over the internet video would save a patient money (*)                                   | Lawford (2018) [57] |
| Receiving an exercise program from a PT over the telephone would be a convenient form of health care for an OA patient (*)      | Lawford (2018) [57] |
| Receiving an exercise program from a PT over the internet video would be a convenient form of health care for an OA patient (*) | Lawford (2018) [57] |
| Receiving an exercise program from a PT over the telephone would save the patient time (*)                                      | Lawford (2018) [57] |
| Receiving an exercise program from a PT over the internet video would save the patient time (*)                                 | Lawford (2018) [57] |
| Using the telephone would be an affordable way for patients to receive a PT-prescribed exercise program for their OA (*)        | Lawford (2018) [57] |
| Using the internet video would be an affordable way for patients to receive a PT-prescribed exercise program for their OA (*)   | Lawford (2018) [57] |
| <b>Positive aspects regarding communication and relationship using telehealth (facilitator)</b>                                 |                     |
| Developed a strong rapport with patients over the telephone                                                                     | Lawford (2019) [37] |
| Consulting via telephone forced to focus on effective conversations with patients (more personal level)                         | Lawford (2019) [37] |
| Pleasantly surprised by experience with video consultations (had some of the best conversations)                                | Lawford (2021) [39] |

Domain 2: Individual HCP factors

*Expertise*

| <b>Description</b>                                                                              | <b>Reference</b>         |
|-------------------------------------------------------------------------------------------------|--------------------------|
| Lack of knowledge or skills around LIs or promoting behavioral change (barrier)                 |                          |
| Lack of knowledge around appropriate interventions for weight loss                              | Allison (2019) [26]      |
| Uncertainty about how to enact their understanding of relationship between weight and knee OA   | Allison (2019) [26]      |
| Limited knowledge of exercise prescription (uncertainty of what exercise to recommend/how much) | Christiansen (2020) [28] |
| Not received sufficient training on exercise/lack of education                                  | Christiansen (2020) [28] |
| Knowledge of exercise and weight-loss treatments is sometimes inaccurate or inadequate          | Egerton (2018) [32]      |
| Reduced confidence with providing suitable exercise and weight loss advice                      | Egerton (2018) [32]      |
| Lack of skills in promoting readiness and motivation for lifestyle treatments                   | Egerton (2018) [32]      |
| Variability in confidence to provide weight management (not confident)                          | MacKay (2018) [40]       |

|    |                                                                                                                                                  |                      |
|----|--------------------------------------------------------------------------------------------------------------------------------------------------|----------------------|
| 1  | Not confident in knowledge about weight management                                                                                               | MacKay (2020) [41]   |
| 2  | Concerns about capacity to learn/not having skills to fulfill study expectations/deal with challenging patients                                  | Nielsen (2014) [44]  |
| 3  | Not have sufficient skills to present PCST component (cognitive restructuring techniques) effectively                                            | Nielsen (2014) [44]  |
| 4  | Some process skills were dissimilar to pre-existing clinical communication skills and challenging to use                                         | Nielsen (2014) [44]  |
| 5  | Lack of knowledge about CBT (necessary to participate in training/RCT to fully appreciate value of CBT to practice)                              | Nielsen (2014) [44]  |
| 6  | Unclear on amount and type of activity necessary to obtain benefits without further damaging the knee                                            | Poitras (2010) [46]  |
| 7  | Uncertainties about dosage/frequency/type of physical activity                                                                                   | Selten (2017) [48]   |
| 8  | Unaware about practice guidelines in relation to aerobic exercise prescription/weight loss/pain management                                       | Tang (2020) [49]     |
| 9  | Knowledge about BMI/weight management was particularly poor (e.g. relying on visual estimations)                                                 | Tang (2020) [49]     |
| 10 | Limited knowledge of how to address weight management                                                                                            | Tang (2020) [49]     |
| 11 | Less awareness about aerobic exercise prescription                                                                                               | Tang (2020) [49]     |
| 12 | Reduced confidence with recommending individual weight/pain management plans (discuss in general terms)                                          | Tang (2020) [49]     |
| 13 | Lack of confidence/knowledge/skills in implementing evidence into practice (e.g. weight management)                                              | Teo (2020) [50]      |
| 14 | I don't have/might not have the required knowledge and training around obesity care (*)                                                          | Hill (2018) [55]     |
| 15 | I do not/might not have sufficient knowledge about knee OA exercise therapy and comorbidity to apply the protocol in daily clinical practice (*) | De Rooij (2020) [59] |
| 16 | Gaps in knowledge/skills (including how to facilitate behavior change, particularly with less motivated patients)                                | Holden (2009) [60]   |
| 17 | Lack of knowledge or skills around OA care in general (barrier)                                                                                  |                      |
| 18 | General lack of expertise/interest in OA (that could lead to inappropriate referral/suboptimal access to services)                               | Mann (2011) [42]     |
| 19 | Lack of physician education on OA care                                                                                                           | Miller (2020) [43]   |
| 20 | Only two GPs had clear understanding of clinical guidelines on OA                                                                                | Okwera (2019) [45]   |
| 21 | No knowledge about treatment                                                                                                                     | Rosemann (2006) [47] |
| 22 | Lack of knowledge or skills around specific resources (barrier)                                                                                  |                      |
| 23 | The issue is not a lack of suitable patient resources but awareness of them                                                                      | Egerton (2018) [32]  |
| 24 | Inability to discuss specific details of ACSM guideline                                                                                          | Tang (2020) [49]     |
| 25 | I do not/might not have sufficient skills to apply the protocol in daily clinical practice (*)                                                   | De Rooij (2020) [59] |
| 26 | I do not/might not read the protocol sufficiently to remember any of its contents (*)                                                            | De Rooij (2020) [59] |
| 27 | Having or improving knowledge or skills around LIs or promoting behavioral change (facilitator)                                                  |                      |
| 28 | Importance of having highly effective communication skills                                                                                       | Egerton (2018) [32]  |
| 29 | Value of monitoring/encouraging patients to develop own understanding of links between exercise/pain                                             | Hinman (2016) [33]   |
| 30 | Confident in capabilities/skills to use strategies they believed to be effective within scope of practice                                        | MacKay (2018) [40]   |
| 31 | Variability in confidence to provide weight management (confident)                                                                               | MacKay (2018) [40]   |
| 32 | Clinical experience helped to read the person's situation (identify approach to motivate them)                                                   | MacKay (2020) [41]   |
| 33 | Postgraduate continuing professional development courses to expand toolkit of therapeutic interventions                                          | MacKay (2020) [41]   |
| 34 | Confidence in addressing weight management                                                                                                       | MacKay (2020) [41]   |
| 35 | Opportunity to review PCST skills and learn more structured/deliberate ways of incorporating these into practice                                 | Nielsen (2014) [44]  |
| 36 | Increasing confidence in using PCST skills over the course of the study                                                                          | Nielsen (2014) [44]  |
| 37 | Improved interpersonal skills with general clinical patients as a result of participating in the study                                           | Nielsen (2014) [44]  |
| 38 |                                                                                                                                                  |                      |
| 39 |                                                                                                                                                  |                      |
| 40 |                                                                                                                                                  |                      |
| 41 |                                                                                                                                                  |                      |
| 42 |                                                                                                                                                  |                      |
| 43 |                                                                                                                                                  |                      |
| 44 |                                                                                                                                                  |                      |
| 45 |                                                                                                                                                  |                      |
| 46 |                                                                                                                                                  |                      |

|                                                                                                                           |                      |
|---------------------------------------------------------------------------------------------------------------------------|----------------------|
| Reasonable understanding of role physiotherapy plays in management of lower-limb OA                                       | Okwera (2019) [45]   |
| Knowledge/confidence in providing treatments related to strengthening and range of motion                                 | Tang (2020) [49]     |
| Confident in providing justifications for non-routinely adhering to guidelines (range of motion exercises)                | Tang (2020) [49]     |
| Being able to describe how they will manage pain during strengthening exercise                                            | Tang (2020) [49]     |
| Having or improving knowledge or skills around OA care in general (facilitator)                                           |                      |
| Need for tailored GP education to improve confidence                                                                      | Egerton (2018) [32]  |
| Importance of provider knowledge regarding OA management                                                                  | Miller (2020) [43]   |
| Physician education on OA management can affect both provider and patient attitudes                                       | Miller (2020) [43]   |
| Training sessions (as suggestion for physiotherapy service improvement)                                                   | Okwera (2019) [45]   |
| Knowledge about treatment                                                                                                 | Rosemann (2006) [47] |
| Available resources might improve knowledge and decision-making (facilitator)                                             |                      |
| Protocols offered guidance in setting up treatment/making clinical decisions/adapting treatment to comorbidity            | De Rooij (2014) [30] |
| List of restrictions was helpful in process of clinical decision making                                                   | De Rooij (2014) [30] |
| Being aware about ACSM guidelines                                                                                         | Tang (2020) [49]     |
| The protocol supports me in clinical reasoning (*)                                                                        | De Rooij (2020) [59] |
| The protocol is supporting the improvement of my knowledge regarding knee OA exercise therapy and comorbidity (*)         | De Rooij (2020) [59] |
| The protocol is supportive in which comorbidity-related symptoms I need to monitor before, during and after treatment (*) | De Rooij (2020) [59] |
| More insight into exercise tolerance/more background knowledge to make clinical decision by using strategy                | De Rooij (2020) [59] |
| Clinical experience (unclear factor)                                                                                      |                      |
| Driven by their professional experience of what does and doesn't work/trial and error                                     | MacKay (2020) [41]   |
| Treatments were based more on what works clinically (opposed to scientific evidence)                                      | MacKay (2020) [41]   |

### *Attitude*

| Description                                                                                          | Reference                |
|------------------------------------------------------------------------------------------------------|--------------------------|
| Negative attitude toward LIs (barrier)                                                               |                          |
| Assigning low priority to exercise as treatment                                                      | Christiansen (2020) [28] |
| GP does not prioritise exercise (*)                                                                  | Cottrell (2016) [52]     |
| It is not/might not be important that people with knee OA increase their overall activity levels (*) | Holden (2009) [60]       |
| Negative attitude toward guidelines or protocols (barrier)                                           |                          |
| Frustrations about lack of autonomy with decision-making                                             | Okwera (2019) [45]       |
| Negativity toward guidelines (clinical reasoning more important)                                     | Okwera (2019) [45]       |
| Positive attitude toward LIs (facilitator)                                                           |                          |
| Acknowledging that weight loss (when someone is overweight) is important                             | Egerton (2018) [32]      |
| Identifying weight management as important                                                           | MacKay (2018) [40]       |
| Perception that exercise and physical activity were central to management                            | MacKay (2020) [41]       |
| Acknowledging that weight management was a component of management                                   | MacKay (2020) [41]       |

|    |                                                                                                                                                                                     |                      |
|----|-------------------------------------------------------------------------------------------------------------------------------------------------------------------------------------|----------------------|
| 1  | Expecting to utilize/continue integrating PCST in general clinical work as physical therapist (beyond the study)                                                                    | Nielsen (2014) [44]  |
| 2  | There is place for each (self-management programs/physiotherapy/orthopedic consultants) in OA management                                                                            | Okwera (2019) [45]   |
| 3  | Many interventions should be used before resorting to medication (including physiotherapy)                                                                                          | Poitras (2010) [46]  |
| 4  | Other interventions (including physiotherapy) should be used before paracetamol                                                                                                     | Poitras (2010) [46]  |
| 5  | NSAIDs alone are not sufficient to appropriately treat inflammation and have to be combined with physiotherapy                                                                      | Poitras (2010) [46]  |
| 6  | Patients should be encouraged to resume/maintain daily activities                                                                                                                   | Poitras (2010) [46]  |
| 7  | Knowing the importance of weight management for knee OA                                                                                                                             | Tang (2020) [49]     |
| 8  | Aware that being overweight/obese is risk factor for knee OA/losing weight is important                                                                                             | Teo (2020) [50]      |
| 9  | Physiotherapy (referral) needs to be prioritised                                                                                                                                    | Cottrell (2016) [52] |
| 10 | It is important that people with CKP increase their overall activity levels (*)                                                                                                     | Cottrell (2016) [52] |
| 11 | Exercise for CKP should (perhaps) preferably be used before drug treatment has been tried (*)                                                                                       | Cottrell (2016) [52] |
| 12 | Weight loss should be the first-line treatment in the management of obese patients with symptomatic knee OA (*)                                                                     | Hill (2018) [54]     |
| 13 | Obese patients with symptomatic knee OA should be referred to a specialist weight management service before orthopaedic assessment (*)                                              | Hill (2018) [54]     |
| 14 | Weight loss should be the first-line treatment in the management of symptomatic knee OA in obesity (*)                                                                              | Hill (2018) [55]     |
| 15 | Support for creation of regional centres where orthopaedic surgeons and bariatric surgeons, with their respective teams, could assess obese patients with symptomatic knee pain (*) | Hill (2018) [55]     |
| 16 | Important to try non-surgical treatments first (*)                                                                                                                                  | Hofstede (2016) [56] |
| 17 | Important to delay a surgery as long as possible (*)                                                                                                                                | Hofstede (2016) [56] |
| 18 | Conservative treatment is (perhaps) an important part of OA management (*)                                                                                                          | Reid (2014) [58]     |
| 19 | Positive attitude toward guidelines or protocols (facilitator)                                                                                                                      |                      |
| 20 | Perceived professional responsibility to adhere to evidence-based guideline                                                                                                         | Allison (2019) [26]  |
| 21 | Important to follow guidelines (*)                                                                                                                                                  | Hofstede (2016) [56] |
| 22 | In general, I do not/might not feel resistance towards working according to protocols (*)                                                                                           | De Rooij (2020) [59] |
| 23 | Autonomy (unclear factor)                                                                                                                                                           |                      |
| 24 | Autonomy affects referral considerations                                                                                                                                            | Law (2019) [36]      |

### Role

| Description                                                                                                        | Reference                |
|--------------------------------------------------------------------------------------------------------------------|--------------------------|
| Perception of own role potentially impeding prescription or follow-up of LIs (barrier)                             |                          |
| Referring patients to other health care providers and for other treatments rather than recommending exercise       | Christiansen (2020) [28] |
| Referring patients to those with specialized knowledge rather than treating themselves (outside scope of practice) | Christiansen (2020) [28] |
| Paternalistic approach to care (low level of engagement in providing exercise and weight management advice)        | Egerton (2018) [32]      |
| Lack of confidence/uncertainty related to role in weight management                                                | MacKay (2020) [41]       |
| Perception that discussions related to diet were not part of their scope of practice                               | MacKay (2020) [41]       |
| Changing own practice style remained as barrier after OA training                                                  | Miller (2020) [43]       |
| Most GPs believed their contribution was essentially limited to diagnosis of condition and medication              | Poitras (2010) [46]      |

|    |                                                                                                                                          |                      |
|----|------------------------------------------------------------------------------------------------------------------------------------------|----------------------|
| 1  | Not focusing on increasing patients' motivation for behavioural change, but just giving general recommendations                          | Rosemann (2006) [47] |
| 2  | Mentioning benefits of weight reduction, but not actively coaching or referring patients                                                 | Selten (2017) [48]   |
| 3  | Not perceiving weight reduction advice as their responsibility                                                                           | Selten (2017) [48]   |
| 4  | Uncertainty over scope of practice/questioning whether weight and pain management fall outside scope                                     | Tang (2020) [49]     |
| 5  | Describing own role as prepping patients for knee surgery when they were referred for physiotherapy                                      | Teo (2020) [50]      |
| 6  | Advice about how to lose weight was limited to brief general advice                                                                      | Teo (2020) [50]      |
| 7  | Considering weight loss to be outside own scope of practice (role of a dietician)                                                        | Teo (2020) [50]      |
| 8  | Comfortable suggesting surgery to patients who responded poorly to conservative management                                               | Teo (2020) [50]      |
| 9  | GPs should (perhaps) not follow-up patients to monitor extent of continuation of exercises (*)                                           | Cottrell (2016) [52] |
| 10 | It is the patient's own responsibility to continue doing their exercise programme (*)                                                    | Cottrell (2016) [52] |
| 11 | Not (or perhaps not) interested in being the orthopedic surgeon in an ortho-bariatric centre (*)                                         | Hill (2018) [54]     |
| 12 | Therapist's role seen as assessment/exercise prescription/education (relatively short-term responsibilities)                             | Holden (2009) [60]   |
| 13 | Patient's role to follow prescribed exercise program over long term/get on board with treatment                                          | Holden (2009) [60]   |
| 14 | Physical therapists should (perhaps) not prescribe general exercise for every patient with knee OA (*)                                   | Holden (2009) [60]   |
| 15 | It is the patient's own responsibility to continue doing their exercise program (*)                                                      | Holden (2009) [60]   |
| 16 | It is not/might not be the physiotherapist's responsibility to make sure that the patient will continue doing their exercise program (*) | Holden (2009) [60]   |
| 17 | Negative consequences for own role when referring patients to LIs (barrier)                                                              |                      |
| 18 | Job satisfaction may be diminished when handing over care of their patients to third party with no involvement                           | Egerton (2017) [31]  |
| 19 | The addition of a care support team may lead them feeling disconnected with their patient's care                                         | Egerton (2017) [31]  |
| 20 | Perception of own role potentially stimulating prescription or follow-up of LIs (facilitator)                                            |                      |
| 21 | Patient-centred approach (high level of engagement in providing exercise and weight management advice)                                   | Egerton (2018) [32]  |
| 22 | Viewing themselves as having an important role in supporting clients to participate in management                                        | MacKay (2018) [40]   |
| 23 | Routinely including education about weight management                                                                                    | MacKay (2020) [41]   |
| 24 | Playing a role in promoting engagement in management                                                                                     | MacKay (2020) [41]   |
| 25 | Necessity of physiotherapy to effectively rehabilitate knee OA patients (because of knowledge/availability)                              | Poitras (2010) [46]  |
| 26 | Importance of PT's role in educating patients with regards to NSAIDs/alternatives (including physiotherapy)                              | Poitras (2010) [46]  |
| 27 | Necessity of PT involvement in managing activity (because potentially detrimental if excessive)                                          | Poitras (2010) [46]  |
| 28 | Exercise planning is usually PT's role (rather than GP's)                                                                                | Poitras (2010) [46]  |
| 29 | Necessity of PT follow-up sessions to assess and encourage patient adherence                                                             | Poitras (2010) [46]  |
| 30 | PT's role to individualize patients' activity according to needs and capacity                                                            | Poitras (2010) [46]  |
| 31 | Although agreeing with active patient participation, it is ultimately PT's role to appropriately manage patients                         | Poitras (2010) [46]  |
| 32 | Desire to be more involved in life style counselling (upgrade of profession)                                                             | Rosemann (2006) [47] |
| 33 | Perceiving exercise prescription to be their main role                                                                                   | Teo (2020) [50]      |
| 34 | Advising patients against surgery for as long as possible (last option)                                                                  | Teo (2020) [50]      |
| 35 | Implementing several strategies to boost adherence                                                                                       | Teo (2020) [50]      |
| 36 | Not their role to advise the patient about knee surgery, opting not to discuss surgery at all                                            | Teo (2020) [50]      |
| 37 | Advising patients against knee arthroscopy if specifically asked about this procedure                                                    | Teo (2020) [50]      |
| 38 |                                                                                                                                          |                      |
| 39 |                                                                                                                                          |                      |
| 40 |                                                                                                                                          |                      |
| 41 |                                                                                                                                          |                      |
| 42 |                                                                                                                                          |                      |
| 43 |                                                                                                                                          |                      |
| 44 |                                                                                                                                          |                      |
| 45 |                                                                                                                                          |                      |
| 46 |                                                                                                                                          |                      |

|                                                                                                                                   |                      |
|-----------------------------------------------------------------------------------------------------------------------------------|----------------------|
| It is part of my job to reassure patients about the safety of exercise for CKP (*)                                                | Cottrell (2016) [52] |
| GPs should educate patients with CKP about how to change their lifestyle for the better (*)                                       | Cottrell (2016) [52] |
| GPs should prescribe quadriceps strengthening exercises to every patient with CKP (*)                                             | Cottrell (2016) [52] |
| GPs should prescribe general exercise (e.g. walking or swimming) for every patient with CKP (*)                                   | Cottrell (2016) [52] |
| There was a BMI threshold above which they would not perform a TKA at all (*)                                                     | Hill (2018) [54]     |
| There was a BMI threshold above which they would not perform a TKA until the patient had attended a weight management program (*) | Hill (2018) [54]     |
| Intention to refer patients to an ortho-bariatric centre if it existed (*)                                                        | Hill (2018) [55]     |
| Recognizing potential influence on exercise adherence, sharing responsibility of exercise adherence with patient                  | Holden (2009) [60]   |
| Physical therapists should prescribe local strengthening exercise for every patient with knee OA (*)                              | Holden (2009) [60]   |
| Physiotherapists should educate chronic patients with knee OA about how to change their lifestyle for the better (*)              | Holden (2009) [60]   |
| Positive consequences for own role when referring patients to LIs (facilitator)                                                   |                      |
| Some appeal for a lessening of their own responsibility in terms of managing this condition                                       | Egerton (2017) [31]  |

### Domain 3: Patient factors

#### Health status

| Description                                                                                                      | Reference           |
|------------------------------------------------------------------------------------------------------------------|---------------------|
| Severity of disease and symptoms (barrier)                                                                       |                     |
| Level of disease severity (i.e. whether people with very mild or very severe joint disease would benefit)        | Egerton (2017) [31] |
| Patients delay care until they are highly symptomatic (missing opportunities to slow disease progression)        | Miller (2020) [43]  |
| Rehabilitation potential depended on length of disability (less potential with late management)                  | Poitras (2010) [46] |
| Paracetamol could mask pain/underlying physical problem (reducing opportunity to assess/manage problem)          | Poitras (2010) [46] |
| Difficult to obtain effective analgesia with some patients                                                       | Poitras (2010) [46] |
| Potential to create unrealistic expectations and discouragement in patients that were too disabled               | Poitras (2010) [46] |
| Questioning capacity to perform regular exercise because of severity of disability                               | Poitras (2010) [46] |
| Knee pain restricts activities in general (which makes weight loss difficult)                                    | Poitras (2010) [46] |
| Pain (main barrier resulting in reduced dosage prescription of strengthening exercises)                          | Tang (2020) [49]    |
| Patient's ability to exercise (main barrier resulting in reduced dosage prescription of strengthening exercises) | Tang (2020) [49]    |
| Pain (key barrier to prescription of exercise as recommended by CPGs)                                            | Tang (2020) [49]    |
| Pain (barrier to prescription of aerobic exercise)                                                               | Tang (2020) [49]    |
| Osteoarthritis severity (mild/severe) (patient-related barrier)                                                  | Wallis (2020) [51]  |
| Effectiveness related to severity of joint damage/pain level (less effective when more damage/pain)              | Holden (2009) [60]  |
| Reluctant to promote exercise in the presence of pain                                                            | Holden (2009) [60]  |
| Pain (as patient-centered barrier to adherence)                                                                  | Holden (2009) [60]  |
| Exercises are not/might not be effective for patients if an X-ray shows severe knee osteoarthritis (*)           | Holden (2009) [60]  |
| Negative impact of comorbidities (barrier)                                                                       |                     |



|    |                                                                                                                                      |                          |
|----|--------------------------------------------------------------------------------------------------------------------------------------|--------------------------|
| 1  | Difficulty with managing multiple conditions/tendency to prioritize other conditions over OA                                         | Christiansen (2020) [28] |
| 2  | Significant impact of other health problems on patients' ability to commit fully to exercise program                                 | Lawford (2020) [38]      |
| 3  | Patient body weight (overweight/obese) (impedes exercise/makes visits to services more difficult)                                    | Miller (2020) [43]       |
| 4  | Questioning capacity to perform regular exercise because of general health                                                           | Poitras (2010) [46]      |
| 5  | Depression as important barrier to motivate patients to physical exercise                                                            | Rosemann (2006) [47]     |
| 6  | Comorbidities (often more severe pain, hampering ability to exercise or be physically active)                                        | Teo (2020) [50]          |
| 7  | Existing comorbidities (patient-related barrier)                                                                                     | Wallis (2020) [51]       |
| 8  | <b>Other patient characteristics (barrier)</b>                                                                                       |                          |
| 9  | Person had been sedentary throughout life                                                                                            | Poitras (2010) [46]      |
| 10 | Questioning capacity to perform regular exercise because of age                                                                      | Poitras (2010) [46]      |
| 11 | Patients with knee OA tended to be older/less active/with slower metabolism (which makes weight loss difficult)                      | Poitras (2010) [46]      |
| 12 | Older age (patient-related barrier)                                                                                                  | Wallis (2020) [51]       |
| 13 | Poor rate of previous (physiotherapy) success (*)                                                                                    | Reid (2014) [58]         |
| 14 | <b>Severity of disease and symptoms (facilitator)</b>                                                                                |                          |
| 15 | Most patients tolerated a lot more than was expected (amount of exercise)                                                            | Lawford (2020) [38]      |
| 16 | Rehabilitation potential depended on length of disability (better outcomes with early management)                                    | Poitras (2010) [46]      |
| 17 | Effective analgesia necessary for patients to be able to accomplish activities                                                       | Poitras (2010) [46]      |
| 18 | Exercise is effective for patients if an X-ray shows severe knee OA (*)                                                              | Cottrell (2016) [52]     |
| 19 | Referring patients to physiotherapy if they had high levels of pain/disability and where radiographic evidence of OA was present (*) | Reid (2014) [58]         |
| 20 | Effectiveness related to severity of joint damage/pain level (more effective when less damage/pain)                                  | Holden (2009) [60]       |
| 21 | Exercises are effective for patients if an X-ray shows moderate knee osteoarthritis (*)                                              | Holden (2009) [60]       |
| 22 | Exercises are effective for patients if an X-ray shows mild knee osteoarthritis (*)                                                  | Holden (2009) [60]       |
| 23 | <b>Other patient characteristics (facilitator)</b>                                                                                   |                          |
| 24 | Clients' pre-existing activity level (e.g. active person)                                                                            | MacKay (2018) [40]       |
| 25 | Importance of evaluating a patient's overall functional ability (rather than only knee signs/symptoms)                               | Teo (2020) [50]          |
| 26 | Referring patients to physiotherapy if they were of a younger age (*)                                                                | Reid (2014) [58]         |
| 27 | <b>Severity of disease and symptoms (unclear factor)</b>                                                                             |                          |
| 28 | Treatment decisions depended on people's symptoms/findings of physical assessment                                                    | MacKay (2020) [41]       |
| 29 | Management strategies depended on how bad the knee is                                                                                | Okwera (2019) [45]       |
| 30 | Exercise does not/might not work just as well for everybody, regardless of the amount of pain they have (*)                          | Cottrell (2016) [52]     |
| 31 | Exercise does not/might not work just as well for everybody, regardless of the amount of pain they have (*)                          | Holden (2009) [60]       |
| 32 | <b>Other patient characteristics (unclear factor)</b>                                                                                |                          |
| 33 | Clients' general health                                                                                                              | MacKay (2018) [40]       |

### *Treatment expectations and preferences*

| Description | Reference |
|-------------|-----------|
|-------------|-----------|

|                                                                                                                       |                          |
|-----------------------------------------------------------------------------------------------------------------------|--------------------------|
| Negative attitude toward LIs (barrier)                                                                                |                          |
| Patients' lack of motivation to exercise/patients want passive treatment approach or quick fix                        | Christiansen (2020) [28] |
| Patients often have own ideas on management (problematic if primarily passive treatments)                             | Egerton (2018) [32]      |
| Reluctance from patients to talk about physical activity (physical therapist's role, not the coach's role)            | Hinman (2016) [33]       |
| Interdisciplinary consult with dietician could not always take place because patients refused to visit dietician      | Knoop (2020) [35]        |
| People that don't particularly like exercise                                                                          | Lawford (2020) [38]      |
| Disconnect between PTs' recommendations for treatment and clients' expectations or preferences                        | MacKay (2018) [40]       |
| Prior experiences with physical therapy influenced client expectations of clinical encounter                          | MacKay (2018) [40]       |
| People's preferences were at odds with physical therapists' beliefs about management                                  | MacKay (2020) [41]       |
| Doubts about patients' willingness to make behavioral changes                                                         | Mann (2011) [42]         |
| Patients don't want to expend effort towards lifestyle change                                                         | Miller (2020) [43]       |
| Public expectation of what physical therapy treatment should be (e.g. didn't come to have thinking challenged)        | Nielsen (2014) [44]      |
| Feeling that patients tended to prefer treatment administered to them                                                 | Okwera (2019) [45]       |
| Negative comments about patient reports of a lack of "hands-on" physiotherapy                                         | Okwera (2019) [45]       |
| Benefits obtained in the long term, which often conflicted with patient expectations for short-term benefits          | Poitras (2010) [46]      |
| Lack of patient motivation in remaining active despite knee OA                                                        | Poitras (2010) [46]      |
| Patient views and expectations rarely matched patient needs                                                           | Poitras (2010) [46]      |
| Questioning capacity to perform regular exercise because of motivation                                                | Poitras (2010) [46]      |
| Success rate in motivating patients too low (distinctly resigned regarding their impact on patients' life style)      | Rosemann (2006) [47]     |
| Frustration about impact of information (e.g. self-help groups) (lot of patients find excuses not to participate)     | Rosemann (2006) [47]     |
| Self-motivation (intrinsic barrier for patient adherence)                                                             | Teo (2020) [50]          |
| Patient expectations (not keen to participate in exercise/play active role in management, desire for quick fix)       | Teo (2020) [50]          |
| Lack of motivation to participate active lifestyle interventions (patient-related barrier)                            | Wallis (2020) [51]       |
| Existing relationships with physiotherapists (as barrier to referral if patient already had treating physiotherapist) | Wallis (2020) [51]       |
| Exercise does not match patient needs/expectations (*)                                                                | Cottrell (2016) [52]     |
| The patients are not/might not be cooperative in applying the protocol in daily clinical practice (*)                 | De Rooij (2020) [59]     |
| Patients with knee OA and comorbidity are not always motivated to perform exercises                                   | De Rooij (2020) [59]     |
| Lack of motivation or laziness (as patient-centered barrier to adherence)                                             | Holden (2009) [60]       |
| Negative treatment expectations (as patient-centered barrier to adherence)                                            | Holden (2009) [60]       |
| Positive attitude toward TJA (barrier)                                                                                |                          |
| Patients' ideas about whether they wanted surgery influenced making referrals to the LMP                              | Law (2019) [36]          |
| Unrealistic expectations of the outcome of joint replacement among patients                                           | Mann (2011) [42]         |
| Feeling pressure by patients to refer them to specialist                                                              | Rosemann (2006) [47]     |
| Make use of patients' preference for TJA within LIs (facilitator)                                                     |                          |
| Suggestion to relist patients completing the programme further up the waiting list (for surgery)                      | Law (2019) [36]          |
| Using bargaining techniques centering on implications of LMP for replacement surgery (put patient on the list)        | Law (2019) [36]          |
| Patients' preferences (unclear factor)                                                                                |                          |

|                                                         |                    |
|---------------------------------------------------------|--------------------|
| Management strategies depended on what the person wants | Okwera (2019) [45] |
|---------------------------------------------------------|--------------------|

### *Active participation*

| Description                                                                                                   | Reference            |
|---------------------------------------------------------------------------------------------------------------|----------------------|
| <b>Low patient adherence or engagement (barrier)</b>                                                          |                      |
| Shifting patients' mind-sets to active participation/making lifestyle changes was challenging/time consuming  | Egerton (2018) [32]  |
| How well they felt the individual patient would engage with programme influenced making referrals to the LMP  | Law (2019) [36]      |
| Challenging work to get clients to initiate management and maintain it over the long term                     | MacKay (2018) [40]   |
| Getting buy-in (engaging people in management) often portrayed as challenge                                   | MacKay (2020) [41]   |
| Lack of compliance with home exercise regimes and advice given to patients was common                         | Okwera (2019) [45]   |
| Patients' adherence to management recommendations was limited (because of fatalism)                           | Poitras (2010) [46]  |
| Patients' unsatisfactory adherence to exercise programs                                                       | Teo (2020) [50]      |
| Main concern was participant adherence to physical activity routines after end of program                     | Duarte (2019) [53]   |
| Negative perceptions of patients' levels of exercise adherence                                                | Holden (2009) [60]   |
| <b>High patient adherence or engagement (facilitator)</b>                                                     |                      |
| Positive impact of information, education, and structured monitoring on patients' adherence to exercise       | Hinman (2016) [33]   |
| Patients adherent/easy to work with when they engaged in exercise program/started seeing improvements         | Lawford (2020) [38]  |
| Cohort of patients, in general, was highly motivated (remained interested/motivated for entirety of 6 months) | Lawford (2021) [39]  |
| Enthusiastic participation of the participants                                                                | Duarte (2019) [53]   |
| <b>Importance of high patient adherence or engagement for effectiveness of LIs (facilitator)</b>              |                      |
| Exercise progression was most effective when the participant requested progression                            | Davis (2018) [29]    |
| Client participation in management was critical to see improvement in symptoms                                | MacKay (2018) [40]   |
| Getting buy-in (engaging people in management) critical to improving outcomes                                 | MacKay (2020) [41]   |
| Necessity of patients' active participation in knee OA management (to achieve significant outcomes)           | Poitras (2010) [46]  |
| How well a patient complies with their exercise programme determines how effective it will be (*)             | Cottrell (2016) [52] |
| Importance of exercise adherence/link between level of adherence and clinical outcomes (dose-response effect) | Holden (2009) [60]   |
| How well a patient complies with their exercise program determines how effective it will be (*)               | Holden (2009) [60]   |

### *Capabilities*

| Description                                                                                                           | Reference           |
|-----------------------------------------------------------------------------------------------------------------------|---------------------|
| <b>Low health literacy (barrier)</b>                                                                                  |                     |
| Poor health literacy in chronic disease management negatively influenced discussing exercise/weight management        | Egerton (2018) [32] |
| Diagnosis can foster fear-avoidance (e.g. reduced activity) due to belief activity/exercise will cause further damage | Egerton (2018) [32] |
| Pessimistic about patients' abilities to make lifestyle changes to address their knee OA (not capable)                | Egerton (2018) [32] |
| Lack of information and patient-professional discussion at point of referral may hinder uptake/retention of LMP       | Law (2019) [36]     |

|    |                                                                                                          |                      |
|----|----------------------------------------------------------------------------------------------------------|----------------------|
| 1  | Patients were sceptical about safety and benefits of strengthening exercise for OA                       | Lawford (2020) [38]  |
| 2  | Fear (patients required a lot of encouragement and reassurance)                                          | Lawford (2020) [38]  |
| 3  | Patients were apprehensive about managing weight by themselves                                           | Lawford (2021) [39]  |
| 4  | Some clients had misconceptions about OA (nothing they could do/normalising it as part of ageing)        | MacKay (2018) [40]   |
| 5  | Some clients feared participation in exercise (concerns for further degeneration)                        | MacKay (2018) [40]   |
| 6  | Accepting diagnosis of OA could be particularly challenging for people with early OA                     | MacKay (2018) [40]   |
| 7  | Clients' language (e.g. haven't mastered English/French)                                                 | MacKay (2018) [40]   |
| 8  | Clients' lifestyle (e.g. coping, attitude towards pain)                                                  | MacKay (2018) [40]   |
| 9  | Insufficient information for OA patients (e.g. not providing leaflets)                                   | Mann (2011) [42]     |
| 10 | Difficulty convincing patients to consider non-surgical, non-medication treatments                       | Miller (2020) [43]   |
| 11 | Lack of patient self-efficacy (regarding lifestyle changes)                                              | Miller (2020) [43]   |
| 12 | Lack of knowledge about OA (patient barrier)                                                             | Miller (2020) [43]   |
| 13 | Most patients demonstrated fatalism/inadequate knowledge and beliefs related to knee OA management       | Poitras (2010) [46]  |
| 14 | Ambivalent about patients' ability to lose weight (not able to succeed in making lifestyle changes)      | Selten (2017) [48]   |
| 15 | The belief that patients are not capable of losing weight                                                | Selten (2017) [48]   |
| 16 | Fear of falling (intrinsic barrier for patient adherence)                                                | Teo (2020) [50]      |
| 17 | Fear of pain (intrinsic barrier for patient adherence)                                                   | Teo (2020) [50]      |
| 18 | Language/different cultural backgrounds (patient-related barrier)                                        | Wallis (2020) [51]   |
| 19 | Patients do not always believe in/may lack knowledge about effectiveness of exercise therapy             | De Rooij (2020) [59] |
| 20 | Fear of harm (as patient-centered barrier to adherence)                                                  | Holden (2009) [60]   |
| 21 | <b>Limited financial resources (barrier)</b>                                                             |                      |
| 22 | Clients' socioeconomic status (e.g. great poverty, shelter system)                                       | MacKay (2018) [40]   |
| 23 | Costs related to weight loss can be prohibitive for patients with limited resources (financial burdens)  | Miller (2020) [43]   |
| 24 | <b>Other responsibilities (barrier)</b>                                                                  |                      |
| 25 | Clients' family responsibilities (e.g. busy, lot going on)                                               | MacKay (2018) [40]   |
| 26 | Work/other commitments precluding exercise-therapy (patient-related barrier)                             | Wallis (2020) [51]   |
| 27 | <b>High health literacy or importance of education (facilitator)</b>                                     |                      |
| 28 | Importance of pain education and reassurance about safety and benefits of exercise                       | Lawford (2020) [38]  |
| 29 | Education contributed to buy-in to treatment (pathology, consequences, treatments)                       | MacKay (2020) [41]   |
| 30 | Need for early education about OA/self-management and treatment options and opportunity to discuss these | Mann (2011) [42]     |
| 31 | Ambivalent about patients' ability to lose weight (able)                                                 | Selten (2017) [48]   |
| 32 | Education focused on self-management strategies                                                          | Teo (2020) [50]      |
| 33 | Inform patients with knee OA and comorbidity better about benefits of exercise therapy                   | De Rooij (2020) [59] |
| 34 | <b>Social support (facilitator)</b>                                                                      |                      |
| 35 | Level of support patients had from family/people close to them seemed to make a big difference           | Lawford (2021) [39]  |
| 36 | Integrating patients' social system into treatment                                                       | Rosemann (2006) [47] |
| 37 | <b>Health literacy (unclear factor)</b>                                                                  |                      |

|                                                                 |                    |
|-----------------------------------------------------------------|--------------------|
| Management strategies depended on what the person can cope with | Okwera (2019) [45] |
| Other responsibilities (unclear factor)                         |                    |
| Clients' occupation                                             | MacKay (2018) [40] |

#### Domain 4: Professional interactions

##### *Collaboration*

| <b>Description</b>                                                                                                    | <b>Reference</b>     |
|-----------------------------------------------------------------------------------------------------------------------|----------------------|
| Non-optimal interdisciplinary collaboration or healthcare provision (barrier)                                         |                      |
| Cautious not to encroach on other HCPs' territory                                                                     | Allison (2019) [26]  |
| Potential for confusion about the treatment plan                                                                      | Egerton (2017) [31]  |
| Potential for issues resulting from incongruence of patient advice and information                                    | Egerton (2017) [31]  |
| Second professional not necessary to fulfill health coach role (part of own professional role as physical therapists) | Hinman (2016) [33]   |
| Overlapping roles of physical therapist and coach could be source of conflict if not working from same set of goals   | Hinman (2016) [33]   |
| Necessary teamwork less likely if coach/physical therapist did not recognize/support each other's goals               | Hinman (2016) [33]   |
| Physicians who did not make timely referrals to physical therapy                                                      | MacKay (2018) [40]   |
| Physicians' attitudes could influence clients' perceptions and level of buy-in to physical therapy                    | MacKay (2018) [40]   |
| Lack of provision for patients who were not candidates for surgery (too long without help)                            | Mann (2011) [42]     |
| Patients lacked proactive follow-up to support self-management                                                        | Mann (2011) [42]     |
| Lack of coordination between leisure, social and health services                                                      | Mann (2011) [42]     |
| Insufficient (physiotherapy) intervention when patients were seen                                                     | Mann (2011) [42]     |
| Belief that physiotherapists did not find it rewarding/interesting to treat OA patients                               | Mann (2011) [42]     |
| Criticizing the decision to centralize musculoskeletal physiotherapy service (useful to have somebody in team)        | Okwera (2019) [45]   |
| Frustrations about lack of continuity regarding team of physiotherapists within clinic                                | Okwera (2019) [45]   |
| Not working closely with physiotherapists/frustrations about working relationship                                     | Okwera (2019) [45]   |
| Dissatisfaction about loss of coherent working since centralizing musculoskeletal physiotherapy service               | Okwera (2019) [45]   |
| Disagreement on effective exercise parameters                                                                         | Poitras (2010) [46]  |
| Disagreement on optimal design of exercise programs to increase adherence                                             | Poitras (2010) [46]  |
| Mistrust in interventions dieticians use to help patients' with weight reduction attempts                             | Selten (2017) [48]   |
| Negative views about physical therapists who provided non-evidence-based treatments                                   | Selten (2017) [48]   |
| Mistrust because they observed huge differences in quality of care delivered by physical therapists                   | Selten (2017) [48]   |
| Occupational therapists, podiatrists and physical therapists do not work together optimally in OA care                | Selten (2017) [48]   |
| Role of rheumatologist in knee/hip OA care perceived as unclear/limited                                               | Selten (2017) [48]   |
| Agreement that orthopedic surgeon's primary task is to assess whether patient is eligible for surgery                 | Selten (2017) [48]   |
| Orthopedic surgeons were perceived negatively by several healthcare providers                                         | Selten (2017) [48]   |
| Unclear what physio offers (*)                                                                                        | Cottrell (2016) [52] |

|    |                                                                                                                                                           |                      |
|----|-----------------------------------------------------------------------------------------------------------------------------------------------------------|----------------------|
| 1  | My colleagues in physiotherapy are not/might not be cooperative in applying the protocol in daily clinical practice (*)                                   | De Rooij (2020) [59] |
| 2  | The general practitioners or other physicians are not/might not be collaborative regarding the application of the protocol in daily clinical practice (*) | De Rooij (2020) [59] |
| 3  | Suboptimal collaboration with general practitioners and physicians                                                                                        | De Rooij (2020) [59] |
| 4  | Referring physicians do not always believe in/may lack knowledge about effectiveness of exercise therapy                                                  | De Rooij (2020) [59] |
| 5  | No access to other HCPs (barrier)                                                                                                                         |                      |
| 6  | Lack of access to other healthcare providers (e.g. physicians with expertise in OA)                                                                       | MacKay (2018) [40]   |
| 7  | Good interdisciplinary collaboration or healthcare provision, or suggestions for improvement (facilitator)                                                |                      |
| 8  | Perceived status of physical therapists within health care team and wider community                                                                       | Allison (2019) [26]  |
| 9  | Importance of clearly understanding roles and functions of service, care support team, and themselves                                                     | Egerton (2017) [31]  |
| 10 | Importance of having confidence in (the skills of) the staff of a new service to deliver on promises                                                      | Egerton (2017) [31]  |
| 11 | Having a personal relationship with the people providing the service/a desire to work closely with service staff                                          | Egerton (2017) [31]  |
| 12 | Appreciation how their participation afforded physical therapists and coaches opportunities to collaborate                                                | Hinman (2016) [33]   |
| 13 | Importance of teamwork in delivering the integrated intervention                                                                                          | Hinman (2016) [33]   |
| 14 | Reinforcement of health messages from another clinician could be valuable                                                                                 | Hinman (2016) [33]   |
| 15 | Having a separate coach freed therapists up to focus on other treatment aspects                                                                           | Hinman (2016) [33]   |
| 16 | Multidisciplinary nature of LMP (ability to utilize expertise from other professionals)                                                                   | Law (2019) [36]      |
| 17 | Importance of good working relationships                                                                                                                  | MacKay (2018) [40]   |
| 18 | Physicians who expressed support for physical therapy/exercise and referred clients to physical therapy early                                             | MacKay (2018) [40]   |
| 19 | Patients would be better served by long-term condition model of care (e.g. diabetes mellitus)                                                             | Mann (2011) [42]     |
| 20 | Patients should initiate own follow-up when needed (as better use of time/health care resources)                                                          | Mann (2011) [42]     |
| 21 | Allow patients, after initial referral, to use direct access system to service (no need for re-referral)                                                  | Mann (2011) [42]     |
| 22 | Utilising clinic health educator who met with patients for weight loss discussions and followed up by phone                                               | Miller (2020) [43]   |
| 23 | Employing a multi-pronged approach to engage patients in weight loss                                                                                      | Miller (2020) [43]   |
| 24 | Overall positive experience of physiotherapy service and therapists                                                                                       | Okwera (2019) [45]   |
| 25 | GPs believed PT involvement was necessary to motivate the patient and manage the exercise program                                                         | Poitras (2010) [46]  |
| 26 | Gate keeper role for GPs could reduce patients' pressure to refer to orthopaedics/decrease performed x-rays                                               | Rosemann (2006) [47] |
| 27 | Involvement of practice nurses is imaginable in the area of life style counselling and advice giving                                                      | Rosemann (2006) [47] |
| 28 | Dieticians are helpful for patients trying to lose weight                                                                                                 | Selten (2017) [48]   |
| 29 | Need for physical therapists to provide evidence-based exercises instead of non-evidence-based modalities                                                 | Selten (2017) [48]   |
| 30 | Non-pharmacological, non-surgical OA care can and should be provided in a primary care setting                                                            | Selten (2017) [48]   |
| 31 | GPs have coordinating role (diagnose/monitor, refer when necessary, lifestyle education, long-term coach)                                                 | Selten (2017) [48]   |
| 32 | Physical therapists can guide patients/provide lifestyle advice (more time compared with GPs)                                                             | Selten (2017) [48]   |
| 33 | Perceiving rheumatologists' role as valuable (giving injections, providing lifestyle/medication advice, refer)                                            | Selten (2017) [48]   |
| 34 | Knowledge that program was delivered by well-trained and trusted physiotherapist                                                                          | Wallis (2020) [51]   |
| 35 | Exercise for CKP is more effectively provided by physiotherapists than GPs (*)                                                                            | Cottrell (2016) [52] |
| 36 | Obese patients with symptomatic knee OA should be assessed by a specialist multidisciplinary service, which should include an orthopaedic surgeon (*)     | Hill (2018) [54]     |
| 37 |                                                                                                                                                           |                      |
| 38 |                                                                                                                                                           |                      |
| 39 |                                                                                                                                                           |                      |
| 40 |                                                                                                                                                           |                      |
| 41 |                                                                                                                                                           |                      |
| 42 |                                                                                                                                                           |                      |
| 43 |                                                                                                                                                           |                      |
| 44 |                                                                                                                                                           |                      |
| 45 |                                                                                                                                                           |                      |
| 46 |                                                                                                                                                           |                      |

|                                                                                                                                                                                    |                      |
|------------------------------------------------------------------------------------------------------------------------------------------------------------------------------------|----------------------|
| Support for creation of regional centres where orthopedic surgeons and bariatric surgeons, with their respective teams, could assess obese patients with symptomatic knee pain (*) | Hill (2018) [54]     |
| Obese patients with symptomatic knee OA should be referred to a specialist weight management service before orthopaedic assessment (*)                                             | Hill (2018) [55]     |
| Obese patients with symptomatic knee OA should be assessed by a specialist multidisciplinary service (*)                                                                           | Hill (2018) [55]     |
| Agreements with colleagues about the content of the care trajectory (*)                                                                                                            | Hofstede (2016) [56] |
| Positive attitudes of colleagues about non-surgical treatments (*)                                                                                                                 | Hofstede (2016) [56] |
| Agreements/ deliberations with primary care (GP, physical therapist, dietician) (*)                                                                                                | Hofstede (2016) [56] |
| Physiotherapists do not/might not lack expertise in OA management (*)                                                                                                              | Reid (2014) [58]     |
| Working with the protocol invites me to discuss more with experts in the field of the comorbidity (*)                                                                              | De Rooij (2020) [59] |
| Inform referrers better about benefits of exercise therapy in patients with knee OA and comorbidity                                                                                | De Rooij (2020) [59] |
| Optimize collaboration with orthopaedic surgeons and other health care providers                                                                                                   | De Rooij (2020) [59] |
| Support from colleagues                                                                                                                                                            | Kloek (2020) [61]    |
| <b>Access to other HCPs (facilitator)</b>                                                                                                                                          |                      |
| Potential benefit of increased access to OA specialists                                                                                                                            | Egerton (2017) [31]  |
| Access to a team on-site/a network of healthcare providers they trusted                                                                                                            | MacKay (2018) [40]   |
| Those with access to other clinicians recommended to consult another clinician for advice on diet as needed                                                                        | MacKay (2020) [41]   |
| Care could be improved if every GP practice contained an individual who took a particular interest in OA                                                                           | Mann (2011) [42]     |
| There should be OA specialist clinicians (all relevant allied health professions) providing services in community                                                                  | Mann (2011) [42]     |
| In-house physiotherapy (as suggestion for physiotherapy service improvement)                                                                                                       | Okwera (2019) [45]   |

### *Communication and referral*

| <b>Description</b>                                                                                                 | <b>Reference</b>     |
|--------------------------------------------------------------------------------------------------------------------|----------------------|
| <b>Lack of communication between HCPs (barrier)</b>                                                                |                      |
| Frustrations about lack of contact/communication involved in the referral and discharge process                    | Okwera (2019) [45]   |
| Dissatisfaction about loss of communication since centralizing musculoskeletal physiotherapy service               | Okwera (2019) [45]   |
| Specialist did not take time to explain what they had examined/x-rays he had taken                                 | Rosemann (2006) [47] |
| Physicians are not always collaborating in discussing medical conditions of patients                               | De Rooij (2020) [59] |
| <b>Challenges of communication and referral procedures (barrier)</b>                                               |                      |
| Necessary teamwork less likely if communication processes not clearly prescribed/structure not used                | Hinman (2016) [33]   |
| Different views were expressed about the preferred medium of communication                                         | Hinman (2016) [33]   |
| Interdisciplinary consult with dietician could not always take place because of problems with contacting dietician | Knoop (2020) [35]    |
| Challenges when coordinating multimodal care (including difficulties with the referral system)                     | Miller (2020) [43]   |
| Frustrations about restrictive referral pathways                                                                   | Okwera (2019) [45]   |
| Referral process was convoluted and at times irrelevant                                                            | Okwera (2019) [45]   |
| Requesting medical information about patients from specialists takes a lot of time                                 | De Rooij (2020) [59] |
| <b>Improving communication between HCPs (facilitator)</b>                                                          |                      |

|                                                                                                               |                      |
|---------------------------------------------------------------------------------------------------------------|----------------------|
| GPs wanted to be updated on the advice given and plan made so they know what has been said to their patient   | Egerton (2017) [31]  |
| Communication needed to be collaborative, patient-centered and consistent for integrated care to be effective | Hinman (2016) [33]   |
| Need for improving communication (quality of referrals, information at discharge)                             | Okwera (2019) [45]   |
| Better communication with specialists could increase efficacy of treatment                                    | Rosemann (2006) [47] |
| Receiving communication back from program physiotherapist about patient outcomes                              | Wallis (2020) [51]   |
| Clarity on what the patient has done at the physical therapist (*)                                            | Hofstede (2016) [56] |
| <b>Needs regarding communication and referral procedures (facilitator)</b>                                    |                      |
| Need to ensure referral procedures are streamlined in order to minimize impact on their busy schedules        | Egerton (2017) [31]  |
| Need for effective, useful and timely channels of communication between the GP and the care support team      | Egerton (2017) [31]  |
| Importance of effective mechanisms to communicate                                                             | MacKay (2018) [40]   |
| Streamlining the physiotherapy referral process (as suggestion for physiotherapy service improvement)         | Okwera (2019) [45]   |
| Straightforward, easy and quick lines of communication among different disciplines in healthcare center       | Selten (2017) [48]   |
| Simple, streamlined referral process (suggestion for promotion and referrals)                                 | Wallis (2020) [51]   |

## Domain 5: Incentives and resources

### *Time*

| <b>Description</b>                                                                                       | <b>Reference</b>     |
|----------------------------------------------------------------------------------------------------------|----------------------|
| <b>Lack of time within patient consultations (barrier)</b>                                               |                      |
| Time pressure (unable to individualise weight management/develop exercise plans within appointment time) | Egerton (2018) [32]  |
| Restricted in amount of time they could allot per patient                                                | MacKay (2018) [40]   |
| Lack of time to give patients sufficient opportunity to discuss their condition                          | Mann (2011) [42]     |
| Lifestyle counseling is huge time commitment                                                             | Miller (2020) [43]   |
| Appointment times too short to address all of patient's issues and provide lifestyle counseling          | Miller (2020) [43]   |
| Time required to teach PCST skills to patients                                                           | Nielsen (2014) [44]  |
| Weight reduction advice takes too much time in a consultation                                            | Selten (2017) [48]   |
| Insufficient time in consultations (*)                                                                   | Cottrell (2016) [52] |
| Time constraints prevent GPs from providing advice on individual exercises for CKP (*)                   | Cottrell (2016) [52] |
| Limited time to review individual patients reduced opportunities to facilitate behavior change           | Holden (2009) [60]   |
| Large caseloads and pressure of waiting lists reduced the number of treatment sessions provided          | Holden (2009) [60]   |
| Limited opportunity to provide follow-up sessions after discharge                                        | Holden (2009) [60]   |
| <b>Lack of time due to other demands (or not further specified) (barrier)</b>                            |                      |
| The addition of a care support team may increase paperwork                                               | Egerton (2017) [31]  |
| Lack of time to monitor attendance/provide support was compounded by increasing administrative demands   | Law (2019) [36]      |
| Wait lists as a burden                                                                                   | MacKay (2018) [40]   |
| Lack of time                                                                                             | Rosemann (2006) [47] |



|                                                                                                                        |                      |
|------------------------------------------------------------------------------------------------------------------------|----------------------|
| Less satisfied about time needed to get used to e-Exercise during high work pressure/administrative burden             | Kloek (2020) [61]    |
| Perceiving web-based application as an additional burden                                                               | Kloek (2020) [61]    |
| Busy work schedules and administrative burden hindered testing/using e-Exercise in their practice                      | Kloek (2020) [61]    |
| <b>Adequate duration of patient consultations (facilitator)</b>                                                        |                      |
| Importance of longer consultations                                                                                     | Egerton (2018) [32]  |
| Having adequate time to spend with clients                                                                             | MacKay (2018) [40]   |
| <b>Adequate duration of specific interventions or protocols (facilitator)</b>                                          |                      |
| Idea of having some of the burden of managing this patient group (e.g. time) taken away appealing                      | Egerton (2017) [31]  |
| Incorporating selected PCST components on as-needed basis most practical way within current environment                | Nielsen (2014) [44]  |
| Working according to the protocol is not/might not be too time-consuming (*)                                           | De Rooij (2020) [59] |
| Perceiving web-based application as time-saving                                                                        | Kloek (2020) [61]    |
| I do not/might not have insufficient time available to get familiar with e-Exercise and to use the web-application (*) | Kloek (2020) [61]    |

### *Financial resources*

| <b>Description</b>                                                                                | <b>Reference</b>     |
|---------------------------------------------------------------------------------------------------|----------------------|
| <b>Limited financial resources within organization (barrier)</b>                                  |                      |
| Concern about capacity to recover costs of incorporating CBT into practice                        | Nielsen (2014) [44]  |
| Treatments (e.g. physiotherapy) prescribed less frequently due to decreasing financial resources  | Rosemann (2006) [47] |
| <b>Financial reward for implementing LIs (facilitator)</b>                                        |                      |
| Financial incentivisation                                                                         | Egerton (2017) [31]  |
| Payment system has to be changed to upgrade conservative treatments and conversation with patient | Rosemann (2006) [47] |
| Interventions performed by practice nurses have to be reinsured sufficiently                      | Rosemann (2006) [47] |
| Working according to the protocol should be financially rewarded (*)                              | De Rooij (2020) [59] |

### *Information resources*

| <b>Description</b>                                                         | <b>Reference</b>     |
|----------------------------------------------------------------------------|----------------------|
| <b>Lack of information resources (barrier)</b>                             |                      |
| Absence of clear guidelines for weight loss                                | Allison (2019) [26]  |
| Lack of information about scheme hindered referral                         | Law (2019) [36]      |
| Lack of resources for face-to-face patient education and patient reference | Miller (2020) [43]   |
| Lack of information about self-help groups/offers on community level       | Rosemann (2006) [47] |
| Missing information about offers e.g. in the community                     | Rosemann (2006) [47] |
| <b>Challenges in accessing information resources (barrier)</b>             |                      |
| Challenges in accessing scientific papers                                  | MacKay (2018) [40]   |
| Difficulty finding high quality, patient-friendly OA educational materials | Miller (2020) [43]   |

|                                                                                                     |                      |
|-----------------------------------------------------------------------------------------------------|----------------------|
| Frustration that material found on Internet or provided by friends/family was frequently inaccurate | Miller (2020) [43]   |
| Cannot access necessary resources (*)                                                               | Cottrell (2016) [52] |
| <b>Availability of information resources (facilitator)</b>                                          |                      |
| Clear preference for concrete guidelines or tools for engaging in weight management                 | Allison (2019) [26]  |
| Recommending informational materials for patients (to mitigate delays in OA care)                   | Miller (2020) [43]   |
| Standardised flowsheet on OA management (as guide for providers/tool for patient discussions)       | Miller (2020) [43]   |
| Specific information about program (suggestion for promotion and referrals)                         | Wallis (2020) [51]   |
| Clear referral criteria/guideline (*)                                                               | Hofstede (2016) [56] |
| <b>Access to information resources (facilitator)</b>                                                |                      |
| Having access to customizable, printable patient resources                                          | Egerton (2018) [32]  |
| Access to current evidence                                                                          | MacKay (2018) [40]   |
| Professional networks/community of practice as mechanism to facilitate sharing of information       | MacKay (2018) [40]   |
| Integrating scientific evidence from studies into their approach to management                      | MacKay (2020) [41]   |
| Including links on websites of partners (suggestion for promotion and referrals)                    | Wallis (2020) [51]   |

### *Facilities*

| <b>Description</b>                                                                          | <b>Reference</b>    |
|---------------------------------------------------------------------------------------------|---------------------|
| <b>Negative attitude toward information technology (barrier)</b>                            |                     |
| Sceptical about benefit of clinical practice information technology                         | Egerton (2018) [32] |
| <b>Potential use of information technology (facilitator)</b>                                |                     |
| Changes to clinical practice information technology (e.g. prompts into clinic software)     | Egerton (2018) [32] |
| Having patient resources embedded within current practice software or routines              | Egerton (2018) [32] |
| Electronic reminders for physicians on how to locate OA treatment information and resources | Miller (2020) [43]  |
| <b>Benefits of working in health centers (facilitator)</b>                                  |                     |
| Collaboration among multiple disciplines could be facilitated by working in a health center | Selten (2017) [48]  |

### Domain 6: Capacity for organizational change

#### *Professional paradigm*

| <b>Description</b>                                                                                          | <b>Reference</b>    |
|-------------------------------------------------------------------------------------------------------------|---------------------|
| <b>Adequate professional paradigm or suggestions for expansion (facilitator)</b>                            |                     |
| Nature of the physical therapy paradigm (in relation to weight management)                                  | Allison (2019) [26] |
| Physical therapy scope of practice was adequate to manage clients with perceived early knee OA              | MacKay (2018) [40]  |
| Suggestion that it would be useful to expand scope of practice to include ordering diagnostic imaging       | MacKay (2018) [40]  |
| Value of increasing profession's explicit understanding/use of PCST skills (practice model may be required) | Nielsen (2014) [44] |

|                                                                                                                 |                     |
|-----------------------------------------------------------------------------------------------------------------|---------------------|
| Value of incorporating aspects of PCST mind-set into professional training (entry-level vs. postgraduate level) | Nielsen (2014) [44] |
|-----------------------------------------------------------------------------------------------------------------|---------------------|

### *Monitoring*

| Description                                       | Reference            |
|---------------------------------------------------|----------------------|
| Audit (facilitator)                               |                      |
| Peer review/audit of professional association (*) | Hofstede (2016) [56] |

### *Support within the organization*

| Description                                                                                                                              | Reference            |
|------------------------------------------------------------------------------------------------------------------------------------------|----------------------|
| Management not supportive (barrier)                                                                                                      |                      |
| The management of my practice is not/might not be collaborative regarding the application of the protocol in daily clinical practice (*) | De Rooij (2020) [59] |

### Domain 7: Social, political, and legal factors

#### *Healthcare system*

| Description                                                                                                            | Reference            |
|------------------------------------------------------------------------------------------------------------------------|----------------------|
| Restrictions due to health insurance (barrier)                                                                         |                      |
| Lack of funding prevented clients from accessing services/seeking help/getting full course of treatment                | MacKay (2018) [40]   |
| Treatments (e.g. physiotherapy) prescribed less frequently due to increasing restrictions by health insurances         | Rosemann (2006) [47] |
| The number of treatments that the patient receives from their insurance company is a barrier in using the protocol (*) | De Rooij (2020) [59] |
| Number of treatment sessions patients receive from insurance companies restricted application of the strategy          | De Rooij (2020) [59] |
| Benefits of good health insurance (facilitator)                                                                        |                      |
| Patients who are well insured have improved access to services (e.g. physical therapy)                                 | Miller (2020) [43]   |
| Positivity toward private sector (patients will get seen a lot quicker)                                                | Okwera (2019) [45]   |
| Private healthcare supplementation (as suggestion for physiotherapy service improvement)                               | Okwera (2019) [45]   |
| In complex patients insurance companies should reimburse more treatment sessions                                       | De Rooij (2020) [59] |
| Government subsidies (facilitator)                                                                                     |                      |
| Government-subsidised allied health visits to facilitate utilisation of services that support exercise/weight loss     | Egerton (2018) [32]  |

### Domain 8: Patient and HCP interactions

#### *Therapeutic alliance*

| Description | Reference |
|-------------|-----------|
|-------------|-----------|

|                                                                                               |                      |
|-----------------------------------------------------------------------------------------------|----------------------|
| <b>Potential negative influence of implementing LIs to relationship (barrier)</b>             |                      |
| Feelings of guilt when referring to LMP (dooming patients to a longer wait for surgery)       | Law (2019) [36]      |
| <b>Importance of communication and relationship (facilitator)</b>                             |                      |
| Strong therapeutic relationship with patients                                                 | Lawford (2020) [38]  |
| Having positive attitude/being encouraging of small changes/being hopeful about OA management | MacKay (2020) [41]   |
| More openly address psychological complaints of patients                                      | Rosemann (2006) [47] |
| Good communication with patient may help in delaying surgery                                  | Selten (2017) [48]   |
| Importance of having trust                                                                    | Selten (2017) [48]   |

### *Lifestyle as conversation topic*

| <b>Description</b>                                                                                                 | <b>Reference</b>    |
|--------------------------------------------------------------------------------------------------------------------|---------------------|
| <b>Challenges of discussing weight (barrier)</b>                                                                   |                     |
| Perceived impact of own weight during weight discussions (not being overweight)                                    | Allison (2019) [26] |
| Apparent discomfort with having conversations about weight                                                         | Allison (2019) [26] |
| Concern about how weight conversations might threaten patient rapport                                              | Allison (2019) [26] |
| Weight loss is sensitive topic (afraid of upsetting their patients results in temptation to avoid discussion)      | Egerton (2018) [32] |
| Weight was touchy/sensitive subject to discuss                                                                     | MacKay (2020) [41]  |
| Difficulties in communicating with patients about being overweight                                                 | Selten (2017) [48]  |
| Viewing weight as sensitive subject/feeling uncomfortable discussing it                                            | Tang (2020) [49]    |
| <b>Factors that could ease the way to discussing weight (facilitator)</b>                                          |                     |
| Perceived impact of own weight during weight discussions (being overweight)                                        | Allison (2019) [26] |
| Feeling comfortable discussing role of physical activity in maintaining weight control                             | MacKay (2020) [41]  |
| Developing rapport with people made it easier to discuss weight management                                         | MacKay (2020) [41]  |
| Reframe discussions around exercise and weight loss (e.g. not blaming/discouraging people)                         | Miller (2020) [43]  |
| Relationship with patients, developed through numerous sessions, facilitated influence for lifestyle modifications | Poitras (2010) [46] |
| Having a relationship with patient built on mutual trust/respect would ease way to discussing weight reduction     | Selten (2017) [48]  |

### Domain 9: Disease factors

#### *Image*

| <b>Description</b>                                                                        | <b>Reference</b>         |
|-------------------------------------------------------------------------------------------|--------------------------|
| <b>OA seen as low priority (barrier)</b>                                                  |                          |
| Assigning low priority to OA as disease                                                   | Christiansen (2020) [28] |
| Concern about providing this service for a condition perceived as low priority            | Egerton (2017) [31]      |
| OA was not given enough attention, symptoms were often dismissed/minimized in health care | Mann (2011) [42]         |

|    |                                                                                                                   |                      |
|----|-------------------------------------------------------------------------------------------------------------------|----------------------|
| 1  | Medical professionals saw OA as low priority with respect to managing their workload                              | Okwera (2019) [45]   |
| 2  | Knee OA more often diagnosed as an unanticipated comorbidity (rarely primary reason for consultation)             | Poitras (2010) [46]  |
| 3  | Not enough emphasis put on primary prevention of knee OA                                                          | Poitras (2010) [46]  |
| 4  | Knee OA management seen as unchallenging routine                                                                  | Poitras (2010) [46]  |
| 5  | Belief that nobody is willing to change lifestyle due to OA, disease has to be a lot worse                        | Rosemann (2006) [47] |
| 6  | OA seen as untreatable and local condition (wear-and-tear) (barrier)                                              |                      |
| 7  | Describing OA as simply a problem of cartilage degeneration/joint space narrowing (on x-ray)/wear and tear        | Egerton (2018) [32]  |
| 8  | Belief that symptoms will progress, and that surgery is inevitable                                                | Egerton (2018) [32]  |
| 9  | Assumption that patients would have negative connotations associated with the label knee OA                       | Egerton (2018) [32]  |
| 10 | No effective treatment options                                                                                    | Miller (2020) [43]   |
| 11 | Incurable nature and negative prognosis of OA                                                                     | Okwera (2019) [45]   |
| 12 | Knee OA seen as uninteresting health problem on which they had limited impact and could not cure                  | Poitras (2010) [46]  |
| 13 | Knee OA was perceived as a degenerative (wear and tear)                                                           | Teo (2020) [50]      |
| 14 | Using negative language to describe OA (wear-and-tear/joint damage/bone-on-bone/degenerative condition)           | Wallis (2020) [51]   |
| 15 | Biomedical perspective on knee OA, attributing signs and symptoms to local knee pathology or wear and tear        | Holden (2009) [60]   |
| 16 | OA seen as chronic degenerative condition that would progressively worsen over time (only cure being surgery)     | Holden (2009) [60]   |
| 17 | Optimistic views toward OA (facilitator)                                                                          |                      |
| 18 | Belief that knee OA is condition that can be successfully managed                                                 | Egerton (2018) [32]  |
| 19 | Importance of conveying to patients that diagnosis is not all negative/delivering a relatively positive prognosis | Egerton (2018) [32]  |
| 20 | Knee OA seen as technically challenging condition                                                                 | Poitras (2010) [46]  |

#### Supplemental File 4. Full overview of all extracted factors per article

##### Explanation

- In the tables below, all extracted factors per included article are presented. The number in brackets ('[...]') displayed after each article corresponds to the reference number used in the main text of the manuscript.

- Column "Number": the capital letter and color used refer to barriers (B/red), facilitators (F/green) or unclear factors (U/orange).

- Column "Description": (\*) at the end of the description indicates that the factor is derived from a close-ended question or attitude statement.

- Column "Subcategory (domain)": the relevant subcategory is displayed first, followed by the number of the domain to which this subcategory belongs. The domain numbers refer to the domains as described in the main text of the manuscript: (1) intervention factors; (2) individual HCP factors; (3) patient factors; (4) professional interactions; (5) incentives and resources; (6) capacity for organizational change; (7) social, political, and legal factors; (8) patient and HCP interactions; (9) disease factors.

- Abbreviations: ACSM: American College of Sports Medicine; BMI: body mass index; CBT: cognitive behavioral therapy; CKP: chronic knee pain; CPG: clinical practice guideline; GP: general practitioner; HCP: healthcare professional; LI: lifestyle intervention; LMP: Lifestyle Management Programme; NSAID: non-steroidal anti-inflammatory drug; NWBE: non-weight bearing quadriceps strengthening exercise; OA: osteoarthritis; PCST: pain coping skills training; PT: physiotherapist; RCT: randomized controlled trial; TKA: total knee arthroplasty; TJA: total joint arthroplasty; WBE: weight bearing functional exercise.

##### Allison (2019) [26]

| Number | Description                                                                                   | Subcategory (domain)                                                                             |
|--------|-----------------------------------------------------------------------------------------------|--------------------------------------------------------------------------------------------------|
| B1     | Cautious not to encroach on other HCPs' territory                                             | Non-optimal interdisciplinary collaboration or healthcare provision (4)                          |
| B2     | Lack of knowledge around appropriate interventions for weight loss                            | Lack of knowledge or skills around LIs or promoting behavioral change (2)                        |
| B3     | Uncertainty about how to enact their understanding of relationship between weight and knee OA | Lack of knowledge or skills around LIs or promoting behavioral change (2)                        |
| B4     | Absence of clear guidelines for weight loss                                                   | Lack of information resources (5)                                                                |
| B5     | Perceived impact of own weight during weight discussions (not being overweight)               | Challenges of discussing weight (8)                                                              |
| B6     | Apparent discomfort with having conversations about weight                                    | Challenges of discussing weight (8)                                                              |
| B7     | Concern about how weight conversations might threaten patient rapport                         | Challenges of discussing weight (8)                                                              |
| F1     | Nature of the physical therapy paradigm (in relation to weight management)                    | Adequate professional paradigm or suggestions for expansion (6)                                  |
| F2     | Perceived status of physical therapists within health care team and wider community           | Good interdisciplinary collaboration or healthcare provision, or suggestions for improvement (4) |
| F3     | Perceived professional responsibility to adhere to evidence-based guideline                   | Positive attitude toward guidelines or protocols (2)                                             |
| F4     | Clear preference for concrete guidelines or tools for engaging in weight management           | Availability of information resources (5)                                                        |

|    |                                                                             |                                                          |
|----|-----------------------------------------------------------------------------|----------------------------------------------------------|
| F5 | Perceived impact of own weight during weight discussions (being overweight) | Factors that could ease the way to discussing weight (8) |
|----|-----------------------------------------------------------------------------|----------------------------------------------------------|

Bossen (2016) [27]

| Number | Description                                                                                                       | Subcategory (domain)                                                                    |
|--------|-------------------------------------------------------------------------------------------------------------------|-----------------------------------------------------------------------------------------|
| B1     | Lack of financial incentive if blended intervention substitutes conventional visits (reduced venues per patient)  | Other challenges for HCPs regarding feasibility of telehealth (1)                       |
| B2     | Most of the patients prefer traditional face-to-face treatments                                                   | Patient-related challenges regarding feasibility of telehealth (1)                      |
| B3     | Most of the patients did not meet study inclusion criteria                                                        | LIs are unavailable or inaccessible (1)                                                 |
| B4     | e-Exercise must be adapted for suitable integration into practice (e.g. no insight into modules patients receive) | Challenges for HCPs during delivery of LIs (1)                                          |
| F1     | 24/7 availability of information and exercises                                                                    | Patient-related benefits regarding feasibility of telehealth (1)                        |
| F2     | Possibility to extend physical therapy treatment in patient's home environment                                    | Benefits of telehealth in terms of effectiveness (1)                                    |
| F3     | Potential to enhance the adherence of home exercises                                                              | Benefits of telehealth in terms of effectiveness (1)                                    |
| F4     | Positive feedback regarding the content of e-Exercise                                                             | Positive experiences with or suggestions to improve the content or structure of LIs (1) |

Christiansen (2020) [28]

| Number | Description                                                                                                        | Subcategory (domain)                                                             |
|--------|--------------------------------------------------------------------------------------------------------------------|----------------------------------------------------------------------------------|
| B1     | Assigning low priority to OA as disease                                                                            | OA seen as low priority (9)                                                      |
| B2     | Assigning low priority to exercise as treatment                                                                    | Negative attitude toward LIs (2)                                                 |
| B3     | Difficulty with managing multiple conditions/tendency to prioritize other conditions over OA                       | Negative impact of comorbidities (3)                                             |
| B4     | Not certain that exercise works                                                                                    | LIs have little or no effect on OA (1)                                           |
| B5     | Referring patients to other health care providers and for other treatments rather than recommending exercise       | Perception of own role potentially impeding prescription or follow-up of LIs (2) |
| B6     | Limited knowledge of exercise prescription (uncertainty of what exercise to recommend/how much)                    | Lack of knowledge or skills around LIs or promoting behavioral change (2)        |
| B7     | Referring patients to those with specialized knowledge rather than treating themselves (outside scope of practice) | Perception of own role potentially impeding prescription or follow-up of LIs (2) |
| B8     | Not received sufficient training on exercise/lack of education                                                     | Lack of knowledge or skills around LIs or promoting behavioral change (2)        |
| B9     | Patients' lack of motivation to exercise/patients want passive treatment approach or quick fix                     | Negative attitude toward LIs (3)                                                 |

Davis (2018) [29]

| Number | Description | Subcategory (domain) |
|--------|-------------|----------------------|
|--------|-------------|----------------------|

|    |                                                                                                    |                                                                                         |
|----|----------------------------------------------------------------------------------------------------|-----------------------------------------------------------------------------------------|
| B1 | Class required intense supervision, which was difficult to provide when most participants were new | Challenges for HCPs during delivery of LIs (1)                                          |
| B2 | Challenges of supervision when space did not allow clear line of sight                             | Challenges for HCPs during delivery of LIs (1)                                          |
| F1 | Enthusiastic about the program and described the results (e.g. it was empowering)                  | LIs have positive mental effects (1)                                                    |
| F2 | Initial classes needed to be small with rolling recruitment very beneficial                        | Ease for HCPs during delivery of LIs (1)                                                |
| F3 | First education session was critical to reducing the participant's anxiety related to exercising   | Positive experiences with or suggestions to improve the content or structure of LIs (1) |
| F4 | Importance of empowering the patients rather than 'pushing' them, achieved by 'giving choices'     | Positive experiences with or suggestions to improve the content or structure of LIs (1) |
| F5 | Exercise progression was most effective when the participant requested progression                 | Importance of high patient adherence or engagement for effectiveness of LIs (3)         |

### De Rooij (2014) [30]

| Number | Description                                                                                                           | Subcategory (domain)                                                |
|--------|-----------------------------------------------------------------------------------------------------------------------|---------------------------------------------------------------------|
| F1     | Protocols offered guidance in setting up treatment/making clinical decisions/adapting treatment to comorbidity        | Available resources might improve knowledge and decision-making (2) |
| F2     | List of restrictions for exercise therapy was conveniently arranged checklist for diagnostic and treatment phases     | Ease for HCPs during delivery of LIs (1)                            |
| F3     | List of restrictions was helpful in process of clinical decision making                                               | Available resources might improve knowledge and decision-making (2) |
| F4     | Suggestion to increase feasibility by reducing the protocols to three main protocols                                  | Ease for HCPs during delivery of LIs (1)                            |
| F5     | Less afraid to increase training intensity (preventing adverse events by tailoring programs to individual's capacity) | Research environment or protocols provide a safety net (1)          |

### Egerton (2017) [31]

| Number | Description                                                                                                    | Subcategory (domain)                                      |
|--------|----------------------------------------------------------------------------------------------------------------|-----------------------------------------------------------|
| B1     | Concern that uptake would be negatively impacted if patients were required to pay                              | Costs of LIs to patients (1)                              |
| B2     | Concern for overcomplicated system when service is not compatible/complementary with existing initiatives      | LIs are not feasible or sustainable (1)                   |
| B3     | Not seeing need (already adequate skills/resources to support OA patient self-management and lifestyle change) | LIs are not feasible or sustainable (1)                   |
| B4     | Concern about providing this service for a condition perceived as low priority                                 | OA seen as low priority (9)                               |
| B5     | Not seeing need (advice already given at their practice would be unhelpfully repeated)                         | LIs are not feasible or sustainable (1)                   |
| B6     | Remote (telephone) delivery is not as good as face-to-face particularly in relation to exercise advice         | Disadvantages of telehealth in terms of effectiveness (1) |
| B7     | Advice to exercise and lose weight does not work                                                               | LIs have little or no effect on OA (1)                    |



|     |                                                                                                                |                                                                                                  |
|-----|----------------------------------------------------------------------------------------------------------------|--------------------------------------------------------------------------------------------------|
| B8  | Hesitancy to embrace an unfamiliar new service                                                                 | Other challenges for HCPs regarding feasibility of telehealth (1)                                |
| B9  | Concern regarding long-term service sustainability                                                             | LIs are not feasible or sustainable (1)                                                          |
| B10 | Concerns about security of patient data and information confidentiality during the referral process            | Telehealth is not safe for patients or patient/data privacy (1)                                  |
| B11 | Job satisfaction may be diminished when handing over care of their patients to third party with no involvement | Negative consequences for own role when referring patients to LIs (2)                            |
| B12 | The addition of a care support team may add complexities to management                                         | LIs are not feasible or sustainable (1)                                                          |
| B13 | The addition of a care support team may increase paperwork                                                     | Lack of time due to other demands (or not further specified) (5)                                 |
| B14 | The addition of a care support team may lead them feeling disconnected with their patient's care               | Negative consequences for own role when referring patients to LIs (2)                            |
| B15 | Potential for confusion about the treatment plan                                                               | Non-optimal interdisciplinary collaboration or healthcare provision (4)                          |
| B16 | Potential for issues resulting from incongruence of patient advice and information                             | Non-optimal interdisciplinary collaboration or healthcare provision (4)                          |
| B17 | Concerned the service would not be able to provide individualized management for a very diverse population     | Insufficient ability to provide personalized treatment within LIs (1)                            |
| B18 | Hearing and cognitive difficulties as barriers for some patients to being able to interact with the service    | Patient-related challenges regarding feasibility of telehealth (1)                               |
| B19 | Level of disease severity (i.e. whether people with very mild or very severe joint disease would benefit)      | Severity of disease and symptoms (3)                                                             |
| B20 | Inability of a remote service to provide locally relevant information                                          | Disadvantages of telehealth in terms of effectiveness (1)                                        |
| B21 | Skepticism about whether many patients would embrace such a model (i.e. because of remote-delivery aspect)     | Patient-related challenges regarding feasibility of telehealth (1)                               |
| F1  | More likely to engage with the care support team if it enabled more affordable/accessible allied health        | LIs are available or accessible, or suggestions for improvement (1)                              |
| F2  | Need to ensure referral procedures are streamlined in order to minimize impact on their busy schedules         | Needs regarding communication and referral procedures (4)                                        |
| F3  | Need for effective, useful and timely channels of communication between the GP and the care support team       | Needs regarding communication and referral procedures (4)                                        |
| F4  | GPs wanted to be updated on the advice given and plan made so they know what has been said to their patient    | Improving communication between HCPs (4)                                                         |
| F5  | Need for clarity about how the new service would integrate with existing schemes and payment structures        | LIs are feasible or sustainable (1)                                                              |
| F6  | Seeing need (advice/recommendations may need to be reinforced/provided over several health care episodes)      | LIs are feasible or sustainable (1)                                                              |
| F7  | Seeing need (extra time and encouragement for the patient would result in better outcomes)                     | LIs are feasible or sustainable (1)                                                              |
| F8  | Potential benefit of increased access to OA specialists                                                        | Access to other HCPs (4)                                                                         |
| F9  | Importance of clearly understanding roles and functions of service, care support team, and themselves          | Good interdisciplinary collaboration or healthcare provision, or suggestions for improvement (4) |

|     |                                                                                                                  |                                                                                                  |
|-----|------------------------------------------------------------------------------------------------------------------|--------------------------------------------------------------------------------------------------|
| F10 | Importance of broad acceptance (patients/doctors/health service funders) if new service is to continue long term | LIs are feasible or sustainable (1)                                                              |
| F11 | Importance of having confidence in (the skills of) the staff of a new service to deliver on promises             | Good interdisciplinary collaboration or healthcare provision, or suggestions for improvement (4) |
| F12 | Having a personal relationship with the people providing the service/a desire to work closely with service staff | Good interdisciplinary collaboration or healthcare provision, or suggestions for improvement (4) |
| F13 | Idea of having some of the burden of managing this patient group (e.g. time) taken away appealing                | Adequate duration of specific interventions or protocols (5)                                     |
| F14 | Some appeal for a lessening of their own responsibility in terms of managing this condition                      | Positive consequences for own role when referring patients to LIs (2)                            |
| F15 | Service could increase access to support for rural patients                                                      | Patient-related benefits regarding feasibility of telehealth (1)                                 |
| F16 | Financial incentivisation                                                                                        | Financial reward for implementing LIs (5)                                                        |

### Egerton (2018) [32]

| Number | Description                                                                                                    | Subcategory (domain)                                                      |
|--------|----------------------------------------------------------------------------------------------------------------|---------------------------------------------------------------------------|
| B1     | Describing OA as simply a problem of cartilage degeneration/joint space narrowing (on x-ray)/wear and tear     | OA seen as untreatable and local condition (wear-and-tear) (9)            |
| B2     | Belief that symptoms will progress, and that surgery is inevitable                                             | OA seen as untreatable and local condition (wear-and-tear) (9)            |
| B3     | Knowledge of exercise and weight-loss treatments is sometimes inaccurate or inadequate                         | Lack of knowledge or skills around LIs or promoting behavioral change (2) |
| B4     | Dubious about effect of exercise and weight-management advice on reducing symptoms                             | LIs have little or no effect on OA (1)                                    |
| B5     | Reduced confidence with providing suitable exercise and weight loss advice                                     | Lack of knowledge or skills around LIs or promoting behavioral change (2) |
| B6     | Lack of skills in promoting readiness and motivation for lifestyle treatments                                  | Lack of knowledge or skills around LIs or promoting behavioral change (2) |
| B7     | Time pressure (unable to individualise weight management/develop exercise plans within appointment time)       | Lack of time within patient consultations (5)                             |
| B8     | Concerns regarding financial cost to patients when considering referral to other services                      | Costs of LIs to patients (1)                                              |
| B9     | Lack of availability of support services (e.g. community-based rehabilitation programs) in remote locations    | LIs are unavailable or inaccessible (1)                                   |
| B10    | Long waiting lists for support services (e.g. community-based rehabilitation programs)                         | LIs are unavailable or inaccessible (1)                                   |
| B11    | Sceptical about benefit of clinical practice information technology                                            | Negative attitude toward information technology (5)                       |
| B12    | The issue is not a lack of suitable patient resources but awareness of them                                    | Lack of knowledge or skills around specific resources (2)                 |
| B13    | Poor health literacy in chronic disease management negatively influenced discussing exercise/weight management | Low health literacy (3)                                                   |
| B14    | Patients often have own ideas on management (problematic if primarily passive treatments)                      | Negative attitude toward LIs (3)                                          |

|     |                                                                                                                       |                                                                                       |
|-----|-----------------------------------------------------------------------------------------------------------------------|---------------------------------------------------------------------------------------|
| B15 | Shifting patients' mind-sets to active participation/making lifestyle changes was challenging/time consuming          | Low patient adherence or engagement (3)                                               |
| B16 | Paternalistic approach to care (low level of engagement in providing exercise and weight management advice)           | Perception of own role potentially impeding prescription or follow-up of LIs (2)      |
| B17 | Assumption that patients would have negative connotations associated with the label knee OA                           | OA seen as untreatable and local condition (wear-and-tear) (9)                        |
| B18 | Diagnosis can foster fear-avoidance (e.g. reduced activity) due to belief activity/exercise will cause further damage | Low health literacy (3)                                                               |
| B19 | Pessimistic about patients' abilities to make lifestyle changes to address their knee OA (not capable)                | Low health literacy (3)                                                               |
| B20 | Weight loss is sensitive topic (afraid of upsetting their patients results in temptation to avoid discussion)         | Challenges of discussing weight (8)                                                   |
| F1  | Need for tailored GP education to improve confidence                                                                  | Having or improving knowledge or skills around OA care in general (2)                 |
| F2  | Importance of having highly effective communication skills                                                            | Having or improving knowledge or skills around LIs or promoting behavioral change (2) |
| F3  | Lifestyle treatments benefited other chronic conditions                                                               | LIs have positive effects on general health (1)                                       |
| F4  | Importance of longer consultations                                                                                    | Adequate duration of patient consultations (5)                                        |
| F5  | Government-subsidised allied health visits to facilitate utilisation of services that support exercise/weight loss    | Government subsidies (7)                                                              |
| F6  | Changes to clinical practice information technology (e.g. prompts into clinic software)                               | Potential use of information technology (5)                                           |
| F7  | Having access to customizable, printable patient resources                                                            | Access to information resources (5)                                                   |
| F8  | Having patient resources embedded within current practice software or routines                                        | Potential use of information technology (5)                                           |
| F9  | Patient-centred approach (high level of engagement in providing exercise and weight management advice)                | Perception of own role potentially stimulating prescription or follow-up of LIs (2)   |
| F10 | Belief that knee OA is condition that can be successfully managed                                                     | Optimistic views toward OA (9)                                                        |
| F11 | Importance of conveying to patients that diagnosis is not all negative/delivering a relatively positive prognosis     | Optimistic views toward OA (9)                                                        |
| F12 | Acknowledging that weight loss (when someone is overweight) is important                                              | Positive attitude toward LIs (2)                                                      |

### Hinman (2016) [33]

| Number | Description                                                                                                       | Subcategory (domain)                                                           |
|--------|-------------------------------------------------------------------------------------------------------------------|--------------------------------------------------------------------------------|
| B1     | Structure/timing of exercise program restricted capacity to modify exercises/provide adequate follow-up           | Non-optimal content or structure of LIs (1)                                    |
| B2     | Lack of face-to-face contact difficult/hindered ability to establish normal rapport/build effective relationships | Negative aspects regarding communication and relationship using telehealth (1) |
| B3     | Second professional not necessary to fulfill health coach role (part of own professional                          | Non-optimal interdisciplinary collaboration or healthcare provision (4)        |

|     |                                                                                                                     |                                                                                                  |
|-----|---------------------------------------------------------------------------------------------------------------------|--------------------------------------------------------------------------------------------------|
|     | role as physical therapists)                                                                                        |                                                                                                  |
| B4  | Overlapping roles of physical therapist and coach could be source of conflict if not working from same set of goals | Non-optimal interdisciplinary collaboration or healthcare provision (4)                          |
| B5  | Reluctance from patients to talk about physical activity (physical therapist's role, not the coach's role)          | Negative attitude toward LIs (3)                                                                 |
| B6  | Necessary teamwork less likely if communication processes not clearly prescribed/structure not used                 | Challenges of communication and referral procedures (4)                                          |
| B7  | Necessary teamwork less likely if coach/physical therapist did not recognize/support each other's goals             | Non-optimal interdisciplinary collaboration or healthcare provision (4)                          |
| B8  | Different views were expressed about the preferred medium of communication                                          | Challenges of communication and referral procedures (4)                                          |
| F1  | Appreciation how their participation afforded physical therapists and coaches opportunities to collaborate          | Good interdisciplinary collaboration or healthcare provision, or suggestions for improvement (4) |
| F2  | Positive impact on patients of personalized attention from coach and from advice/education they provided            | LIs have positive effects (not further specified) (1)                                            |
| F3  | Value of monitoring/encouraging patients to develop own understanding of links between exercise/pain                | Having or improving knowledge or skills around LIs or promoting behavioral change (2)            |
| F4  | Positive impact of information, education, and structured monitoring on patients' adherence to exercise             | High patient adherence or engagement (3)                                                         |
| F5  | Requirements of treatment protocol freed therapists to notice and reflect on impact of the interventions            | Ease for HCPs during delivery of LIs (1)                                                         |
| F6  | Positive comments about the exercise regimen                                                                        | Positive experiences with or suggestions to improve the content or structure of LIs (1)          |
| F7  | Structured protocol allowed to experience different OA treatment regimen/observe and learn from impact              | Ease for HCPs during delivery of LIs (1)                                                         |
| F8  | Structure provided by protocol/structure of exercises (how patients included them into daily routine)               | Positive experiences with or suggestions to improve the content or structure of LIs (1)          |
| F9  | Importance of teamwork in delivering the integrated intervention                                                    | Good interdisciplinary collaboration or healthcare provision, or suggestions for improvement (4) |
| F10 | Reinforcement of health messages from another clinician could be valuable                                           | Good interdisciplinary collaboration or healthcare provision, or suggestions for improvement (4) |
| F11 | Having a separate coach freed therapists up to focus on other treatment aspects                                     | Good interdisciplinary collaboration or healthcare provision, or suggestions for improvement (4) |
| F12 | Communication needed to be collaborative, patient-centered and consistent for integrated care to be effective       | Improving communication between HCPs (4)                                                         |

### Hinman (2017) [34]

| Number | Description | Subcategory (domain) |
|--------|-------------|----------------------|
|--------|-------------|----------------------|

1  
2  
3  
4  
5  
6  
7  
8  
9  
10  
11  
12  
13  
14  
15  
16  
17  
18  
19  
20  
21  
22  
23  
24  
25  
26  
27  
28  
29  
30  
31  
32  
33  
34  
35  
36  
37  
38  
39  
40  
41  
42  
43  
44  
45  
46

|     |                                                                                                                  |                                                                                |
|-----|------------------------------------------------------------------------------------------------------------------|--------------------------------------------------------------------------------|
| B1  | Occasional technical difficulties (e.g. poor internet connection) could disrupt the flow of the consultation     | Negative aspects regarding communication and relationship using telehealth (1) |
| B2  | Patient flexibility could come at a cost to the therapist sometimes (allowed patients to reschedule last minute) | Other challenges for HCPs regarding feasibility of telehealth (1)              |
| B3  | Forced to modify usual habits/rely more on information shared by patients (instead of own physical assessment)   | Challenges for HCPs regarding lack of physical/visual contact (1)              |
| B4  | Some discomfort without hands-on assessment (no palpation of patient’s knee/hands-on facilitation of exercises)  | Challenges for HCPs regarding lack of physical/visual contact (1)              |
| B5  | Skype consultations more suitable as adjunctive to usual in-clinic care (initial assessment in person preferred) | Other challenges for HCPs regarding feasibility of telehealth (1)              |
| F1  | Ease of using Skype for consultations                                                                            | Positive attitude or needs of HCPs regarding feasibility of telehealth (1)     |
| F2  | Quality of technology suitable for providing instructions/prescribing exercises/receiving instantaneous feedback | Positive attitude or needs of HCPs regarding feasibility of telehealth (1)     |
| F3  | Skype-delivered care convenient for patients (time efficiency/flexibility/access)                                | Patient-related benefits regarding feasibility of telehealth (1)               |
| F4  | Empowering effect of home environment on patient adherence with exercise program                                 | Benefits of telehealth in terms of effectiveness (1)                           |
| F5  | Home environment facilitated correct and safe exercise techniques                                                | Telehealth is safe for patients or patient/data privacy (1)                    |
| F6  | Using Skype distilled focus to most important and effective treatment elements to facilitate self-management     | Benefits of telehealth in terms of effectiveness (1)                           |
| F7  | Patients more relaxed in home environment/more receptive to the information the therapists provided              | Benefits of telehealth in terms of effectiveness (1)                           |
| F8  | Patients responded favorably to the exercises prescribed despite lack of hands-on assessment                     | Lack of physical/visual contact not a major issue for HCPs (1)                 |
| F9  | Safety net provided by research environment (e.g. patients were previously screened for comorbidities/red flags) | Research environment or protocols provide a safety net (1)                     |
| F10 | Hands-off approach was physically less demanding compared to usual care/contributed to sense of satisfaction     | Lack of physical/visual contact not a major issue for HCPs (1)                 |
| F11 | Functional improvements experienced by patients                                                                  | LIs have positive effects on affected joint(s) (1)                             |
| F12 | Functional improvements were observable using Skype                                                              | Lack of physical/visual contact not a major issue for HCPs (1)                 |
| F13 | Greater confidence to exercise among patients                                                                    | LIs have positive mental effects (1)                                           |

Knoop (2020) [35]

| Number | Description                                                                                                        | Subcategory (domain)                                    |
|--------|--------------------------------------------------------------------------------------------------------------------|---------------------------------------------------------|
| B1     | Maximum number of four sessions was considered too low in many patients                                            | Non-optimal content or structure of LIs (1)             |
| B2     | Behavioral approach in exercise therapy and advice to visit GP were considered unnecessary for most patients       | Non-optimal content or structure of LIs (1)             |
| B3     | Interdisciplinary consult with dietician could not always take place because of problems with contacting dietician | Challenges of communication and referral procedures (4) |

|    |                                                                                                                  |                                     |
|----|------------------------------------------------------------------------------------------------------------------|-------------------------------------|
| B4 | Interdisciplinary consult with dietician could not always take place because patients refused to visit dietician | Negative attitude toward LIs (3)    |
| F1 | Model of stratified care easy to apply and having added value for daily practice                                 | LIs are feasible or sustainable (1) |
| F2 | Appreciation of applicability of treatment protocols                                                             | LIs are feasible or sustainable (1) |

Law (2019) [36]

| Number | Description                                                                                                     | Subcategory (domain)                                                                             |
|--------|-----------------------------------------------------------------------------------------------------------------|--------------------------------------------------------------------------------------------------|
| B1     | Patients' ideas about whether they wanted surgery influenced making referrals to the LMP                        | Positive attitude toward TJA (3)                                                                 |
| B2     | How well they felt the individual patient would engage with programme influenced making referrals to the LMP    | Low patient adherence or engagement (3)                                                          |
| B3     | Lack of information about scheme hindered referral                                                              | Lack of information resources (5)                                                                |
| B4     | Feelings of guilt when referring to LMP (dooming patients to a longer wait for surgery)                         | Potential negative influence of implementing LIs to relationship (8)                             |
| B5     | Lack of information and patient-professional discussion at point of referral may hinder uptake/retention of LMP | Low health literacy (3)                                                                          |
| B6     | Lack of time to monitor attendance/provide support was compounded by increasing administrative demands          | Lack of time due to other demands (or not further specified) (5)                                 |
| F1     | Multidisciplinary nature of LMP (whole-person, intensive and functional approach)                               | Positive experiences with or suggestions to improve the content or structure of LIs (1)          |
| F2     | Multidisciplinary nature of LMP (ability to utilize expertise from other professionals)                         | Good interdisciplinary collaboration or healthcare provision, or suggestions for improvement (4) |
| F3     | Suggestion to relist patients completing the programme further up the waiting list (for surgery)                | Make use of patients' preference for TJA within LIs (3)                                          |
| F4     | LMP would benefit from extension of inclusion criteria (patients with less severe OA and lower BMI)             | LIs are available or accessible, or suggestions for improvement (1)                              |
| F5     | Emphasising health benefits of programme                                                                        | LIs have positive effects (not further specified) (1)                                            |
| F6     | Reminding patients of opportunity to self-manage                                                                | LIs have positive mental effects (1)                                                             |
| F7     | Using bargaining techniques centering on implications of LMP for replacement surgery (put patient on the list)  | Make use of patients' preference for TJA within LIs (3)                                          |
| F8     | Standardization was viewed as important for monitoring and evaluation purposes                                  | Positive experiences with or suggestions to improve the content or structure of LIs (1)          |
| F9     | Flexibility was valuable when tackling local participation challenges                                           | Ability and importance of providing personalized treatment within LIs (1)                        |
| F10    | Helpful social impact of group-based programme                                                                  | Positive experiences with or suggestions to improve the content or structure of LIs (1)          |
| F11    | Further and ongoing evaluation of the LMP would help to address current challenges                              | LIs are feasible or sustainable (1)                                                              |

|    |                                          |              |
|----|------------------------------------------|--------------|
| U1 | Autonomy affects referral considerations | Autonomy (2) |
|----|------------------------------------------|--------------|

Lawford (2019) [37]

| Number | Description                                                                                                      | Subcategory (domain)                                                           |
|--------|------------------------------------------------------------------------------------------------------------------|--------------------------------------------------------------------------------|
| B1     | Telephone not viewed as primary mode of providing care (only for follow-up)                                      | Other challenges for HCPs regarding feasibility of telehealth (1)              |
| B2     | Assessment of patients could be difficult when consulting via telephone (inability to observe)                   | Challenges for HCPs regarding lack of physical/visual contact (1)              |
| B3     | Relationships with patients might be adversely impacted/could be difficult to develop rapport                    | Negative aspects regarding communication and relationship using telehealth (1) |
| B4     | Difficulties communicating might be experienced when consulting via telephone                                    | Negative aspects regarding communication and relationship using telehealth (1) |
| B5     | Lack of visual/physical contact would limit strategies available when teaching patients an exercise program      | Challenges for HCPs regarding lack of physical/visual contact (1)              |
| B6     | Some difficulty scheduling telephone consultations during usual day of face-to-face consultations                | Other challenges for HCPs regarding feasibility of telehealth (1)              |
| F1     | Telephone-delivered care would be convenient for patients                                                        | Patient-related benefits regarding feasibility of telehealth (1)               |
| F2     | Patients could be more comfortable talking about condition/engaging in exercise program from own home            | Benefits of telehealth in terms of effectiveness (1)                           |
| F3     | Telephone-delivered care could reduce patient costs associated with accessing physiotherapy services             | Patient-related benefits regarding feasibility of telehealth (1)               |
| F4     | Telephone-delivered care could provide increased opportunities to educate patients about OA                      | Benefits of telehealth in terms of effectiveness (1)                           |
| F5     | Telephone-delivered care could allow wider variety of patients to access physiotherapy                           | Patient-related benefits regarding feasibility of telehealth (1)               |
| F6     | More effective communication skills would be needed to consult via telephone                                     | Positive attitude or needs of HCPs regarding feasibility of telehealth (1)     |
| F7     | It would be necessary to provide patients with pictures or videos of each exercise when consulting via telephone | Positive attitude or needs of HCPs regarding feasibility of telehealth (1)     |
| F8     | Experiences providing telephone-delivered care exceeded expectations, resulting in new enthusiasm                | Positive attitude or needs of HCPs regarding feasibility of telehealth (1)     |
| F9     | Lack of physical and visual contact less of an issue than anticipated                                            | Lack of physical/visual contact not a major issue for HCPs (1)                 |
| F10    | Developed a strong rapport with patients over the telephone                                                      | Positive aspects regarding communication and relationship using telehealth (1) |
| F11    | Patient adherence to telephone-delivered exercise program was high                                               | Benefits of telehealth in terms of effectiveness (1)                           |
| F12    | Consulting via telephone forced to focus on effective conversations with patients (more personal level)          | Positive aspects regarding communication and relationship using telehealth (1) |
| F13    | Noticeable shift in patients' expectations of physiotherapy care (more willing to self-manage their condition)   | Patient-related benefits regarding feasibility of telehealth (1)               |
| F14    | Improvements in patient pain and function                                                                        | LIs have positive effects on affected joint(s) (1)                             |
| F15    | Increased confidence to self-manage                                                                              | LIs have positive mental effects (1)                                           |

|     |                                                                                                       |                                                                            |
|-----|-------------------------------------------------------------------------------------------------------|----------------------------------------------------------------------------|
| F16 | Telephone-delivered care was convenient for patients                                                  | Patient-related benefits regarding feasibility of telehealth (1)           |
| F17 | Able to work around the lack of visual contact (erring on the side of caution)                        | Lack of physical/visual contact not a major issue for HCPs (1)             |
| F18 | Written materials provided to patients helped to prescribe exercises effectively                      | Positive attitude or needs of HCPs regarding feasibility of telehealth (1) |
| F19 | There was a safety net in place with the trial (each patient had been screened)                       | Research environment or protocols provide a safety net (1)                 |
| F20 | Training in communication and/or health coaching important to effectively deliver care over telephone | Positive attitude or needs of HCPs regarding feasibility of telehealth (1) |

### Lawford (2020) [38]

| Number | Description                                                                                           | Subcategory (domain)                                                      |
|--------|-------------------------------------------------------------------------------------------------------|---------------------------------------------------------------------------|
| B1     | Patients were sceptical about safety and benefits of strengthening exercise for OA                    | Low health literacy (3)                                                   |
| B2     | Fear (patients required a lot of encouragement and reassurance)                                       | Low health literacy (3)                                                   |
| B3     | Being apprehensive about aggravating pain in patients                                                 | LIs are unsafe or have negative effects (1)                               |
| B4     | People that don't particularly like exercise                                                          | Negative attitude toward LIs (3)                                          |
| B5     | Mental effort required for WBE program was challenging for patients                                   | Challenges for patients during participation in LIs (1)                   |
| B6     | Tending to avoid pushing patients in usual clinical practice                                          | LIs are unsafe or have negative effects (1)                               |
| B7     | Physical challenge was the complexity of WBE program                                                  | Challenges for patients during participation in LIs (1)                   |
| B8     | Challenges associated with cuff weights used to apply resistance in NWBE program                      | Challenges for HCPs during delivery of LIs (1)                            |
| B9     | Straight leg raise challenging in NWBE program                                                        | Challenges for patients during participation in LIs (1)                   |
| B10    | Significant impact of other health problems on patients' ability to commit fully to exercise program  | Negative impact of comorbidities (3)                                      |
| F1     | Experiences in study helped them push patients through more pain than they would have previously      | Research environment or protocols provide a safety net (1)                |
| F2     | NWBE program was generally easier for patients to follow (mental effort)                              | Ease for patients during participation in LIs (1)                         |
| F3     | NWBE program was easier to prescribe (mental effort)                                                  | Ease for HCPs during delivery of LIs (1)                                  |
| F4     | Most patients tolerated a lot more than was expected (amount of exercise)                             | Severity of disease and symptoms (3)                                      |
| F5     | Easier to prescribe and progress NWBE than WBE program (physical complexity)                          | Ease for HCPs during delivery of LIs (1)                                  |
| F6     | Patients adherent/easy to work with when they engaged in exercise program/started seeing improvements | High patient adherence or engagement (3)                                  |
| F7     | Strong therapeutic relationship with patients                                                         | Importance of communication and relationship (8)                          |
| F8     | Importance of pain education and reassurance about safety and benefits of exercise                    | High health literacy or importance of education (3)                       |
| F9     | Tailoring exercise programs to individual patient would overcome some challenges                      | Ability and importance of providing personalized treatment within LIs (1) |

### Lawford (2021) [39]



| Number | Description                                                                                                   | Subcategory (domain)                                                                    |
|--------|---------------------------------------------------------------------------------------------------------------|-----------------------------------------------------------------------------------------|
| B1     | Video consultations made it more difficult to have emotional conversations/read non-verbal cues               | Negative aspects regarding communication and relationship using telehealth (1)          |
| B2     | Patients were apprehensive about managing weight by themselves                                                | Low health literacy (3)                                                                 |
| B3     | Volume of resources could be overwhelming/confusing for some patients                                         | Challenges for patients during participation in LIs (1)                                 |
| F1     | Simplicity and convenience of meal replacements                                                               | Ease for patients during participation in LIs (1)                                       |
| F2     | Video consultations were easy and convenient                                                                  | Positive attitude or needs of HCPs regarding feasibility of telehealth (1)              |
| F3     | Pleasantly surprised by experience with video consultations (had some of the best conversations)              | Positive aspects regarding communication and relationship using telehealth (1)          |
| F4     | Level of support patients had from family/people close to them seemed to make a big difference                | Social support (3)                                                                      |
| F5     | Long-term follow-up consultations would be beneficial                                                         | Positive experiences with or suggestions to improve the content or structure of LIs (1) |
| F6     | Cohort of patients, in general, was highly motivated (remained interested/motivated for entirety of 6 months) | High patient adherence or engagement (3)                                                |
| F7     | Rapid weight loss was primary driver of motivation                                                            | LIs have positive effects on general health (1)                                         |
| F8     | Extremely positive about educational resources provided                                                       | Positive experiences with or suggestions to improve the content or structure of LIs (1) |
| F9     | More information about healthy eating beyond meal replacement phase could be included                         | Positive experiences with or suggestions to improve the content or structure of LIs (1) |
| F10    | Exercise/physical activity program was an important part of intervention                                      | Positive experiences with or suggestions to improve the content or structure of LIs (1) |
| F11    | Large improvements in knee pain                                                                               | LIs have positive effects on affected joint(s) (1)                                      |
| F12    | Positive lifestyle changes (patients) (e.g. thinking differently)                                             | LIs have positive mental effects (1)                                                    |

### MacKay (2018) [40]

| Number | Description                                                                                             | Subcategory (domain)                                                      |
|--------|---------------------------------------------------------------------------------------------------------|---------------------------------------------------------------------------|
| B1     | Lack of infrastructure or local programmes (particularly in rural settings)                             | LIs are unavailable or inaccessible (1)                                   |
| B2     | Cost was a factor in whether clients could access facilities/programmes                                 | Costs of LIs to patients (1)                                              |
| B3     | Lack of funding prevented clients from accessing services/seeking help/getting full course of treatment | Restrictions due to health insurance (7)                                  |
| B4     | Clients often had a waiting period before accessing care                                                | LIs are unavailable or inaccessible (1)                                   |
| B5     | Wait lists as a burden                                                                                  | Lack of time due to other demands (or not further specified) (5)          |
| B6     | Lack of access to other healthcare providers (e.g. physicians with expertise in OA)                     | No access to other HCPs (4)                                               |
| B7     | Variability in confidence to provide weight management (not confident)                                  | Lack of knowledge or skills around LIs or promoting behavioral change (2) |

|     |                                                                                                               |                                                                                                  |
|-----|---------------------------------------------------------------------------------------------------------------|--------------------------------------------------------------------------------------------------|
| B8  | Physicians who did not make timely referrals to physical therapy                                              | Non-optimal interdisciplinary collaboration or healthcare provision (4)                          |
| B9  | Physicians' attitudes could influence clients' perceptions and level of buy-in to physical therapy            | Non-optimal interdisciplinary collaboration or healthcare provision (4)                          |
| B10 | Restricted in amount of time they could allot per patient                                                     | Lack of time within patient consultations (5)                                                    |
| B11 | Challenges in accessing scientific papers                                                                     | Challenges in accessing information resources (5)                                                |
| B12 | Challenging work to get clients to initiate management and maintain it over the long term                     | Low patient adherence or engagement (3)                                                          |
| B13 | Disconnect between PTs' recommendations for treatment and clients' expectations or preferences                | Negative attitude toward LIs (3)                                                                 |
| B14 | Prior experiences with physical therapy influenced client expectations of clinical encounter                  | Negative attitude toward LIs (3)                                                                 |
| B15 | Some clients had misconceptions about OA (nothing they could do/normalising it as part of ageing)             | Low health literacy (3)                                                                          |
| B16 | Some clients feared participation in exercise (concerns for further degeneration)                             | Low health literacy (3)                                                                          |
| B17 | Accepting diagnosis of OA could be particularly challenging for people with early OA                          | Low health literacy (3)                                                                          |
| B18 | Clients' socioeconomic status (e.g. great poverty, shelter system)                                            | Limited financial resources (3)                                                                  |
| B19 | Clients' language (e.g. haven't mastered English/French)                                                      | Low health literacy (3)                                                                          |
| B20 | Clients' family responsibilities (e.g. busy, lot going on)                                                    | Other responsibilities (3)                                                                       |
| B21 | Clients' lifestyle (e.g. coping, attitude towards pain)                                                       | Low health literacy (3)                                                                          |
| F1  | Benefits of having infrastructure and programmes available in their communities                               | LIs are available or accessible, or suggestions for improvement (1)                              |
| F2  | Access to a team on-site/a network of healthcare providers they trusted                                       | Access to other HCPs (4)                                                                         |
| F3  | Importance of good working relationships                                                                      | Good interdisciplinary collaboration or healthcare provision, or suggestions for improvement (4) |
| F4  | Importance of effective mechanisms to communicate                                                             | Needs regarding communication and referral procedures (4)                                        |
| F5  | Confident in capabilities/skills to use strategies they believed to be effective within scope of practice     | Having or improving knowledge or skills around LIs or promoting behavioral change (2)            |
| F6  | Identifying weight management as important                                                                    | Positive attitude toward LIs (2)                                                                 |
| F7  | Variability in confidence to provide weight management (confident)                                            | Having or improving knowledge or skills around LIs or promoting behavioral change (2)            |
| F8  | Treatment could improve clients' symptoms (e.g. reduce pain, increase function)                               | LIs have positive effects on affected joint(s) (1)                                               |
| F9  | Treatment could potentially slow progression of symptoms                                                      | LIs have positive effects on affected joint(s) (1)                                               |
| F10 | Physicians who expressed support for physical therapy/exercise and referred clients to physical therapy early | Good interdisciplinary collaboration or healthcare provision, or suggestions for improvement (4) |
| F11 | Physical therapy scope of practice was adequate to manage clients with perceived early knee OA                | Adequate professional paradigm or suggestions for expansion (6)                                  |
| F12 | Suggestion that it would be useful to expand scope of practice to include ordering diagnostic imaging         | Adequate professional paradigm or suggestions for expansion (6)                                  |

|     |                                                                                                   |                                                                                     |
|-----|---------------------------------------------------------------------------------------------------|-------------------------------------------------------------------------------------|
| F13 | Having adequate time to spend with clients                                                        | Adequate duration of patient consultations (5)                                      |
| F14 | Access to current evidence                                                                        | Access to information resources (5)                                                 |
| F15 | Professional networks/community of practice as mechanism to facilitate sharing of information     | Access to information resources (5)                                                 |
| F16 | Client participation in management was critical to see improvement in symptoms                    | Importance of high patient adherence or engagement for effectiveness of LIs (3)     |
| F17 | Viewing themselves as having an important role in supporting clients to participate in management | Perception of own role potentially stimulating prescription or follow-up of LIs (2) |
| F18 | Clients' pre-existing activity level (e.g. active person)                                         | Other patient characteristics (3)                                                   |
| U1  | Clients' general health                                                                           | Other patient characteristics (3)                                                   |
| U2  | Clients' occupation                                                                               | Other responsibilities (3)                                                          |

### MacKay (2020) [41]

| Number | Description                                                                                             | Subcategory (domain)                                                                  |
|--------|---------------------------------------------------------------------------------------------------------|---------------------------------------------------------------------------------------|
| B1     | Lack of confidence/uncertainty related to role in weight management                                     | Perception of own role potentially impeding prescription or follow-up of LIs (2)      |
| B2     | Weight was touchy/sensitive subject to discuss                                                          | Challenges of discussing weight (8)                                                   |
| B3     | Not confident in knowledge about weight management                                                      | Lack of knowledge or skills around LIs or promoting behavioral change (2)             |
| B4     | Perception that discussions related to diet were not part of their scope of practice                    | Perception of own role potentially impeding prescription or follow-up of LIs (2)      |
| B5     | Getting buy-in (engaging people in management) often portrayed as challenge                             | Low patient adherence or engagement (3)                                               |
| B6     | People's preferences were at odds with physical therapists' beliefs about management                    | Negative attitude toward LIs (3)                                                      |
| F1     | Clinical experience helped to read the person's situation (identify approach to motivate them)          | Having or improving knowledge or skills around LIs or promoting behavioral change (2) |
| F2     | Integrating scientific evidence from studies into their approach to management                          | Access to information resources (5)                                                   |
| F3     | Postgraduate continuing professional development courses to expand toolkit of therapeutic interventions | Having or improving knowledge or skills around LIs or promoting behavioral change (2) |
| F4     | Interventions in physical therapists' toolbox were not static (changed over time)                       | LIs are feasible or sustainable (1)                                                   |
| F5     | Perception that exercise and physical activity were central to management                               | Positive attitude toward LIs (2)                                                      |
| F6     | Acknowledging that weight management was a component of management                                      | Positive attitude toward LIs (2)                                                      |
| F7     | Confidence in addressing weight management                                                              | Having or improving knowledge or skills around LIs or promoting behavioral change (2) |
| F8     | Routinely including education about weight management                                                   | Perception of own role potentially stimulating prescription or follow-up of LIs (2)   |
| F9     | Feeling comfortable discussing role of physical activity in maintaining weight control                  | Factors that could ease the way to discussing weight (8)                              |
| F10    | Those with access to other clinicians recommended to consult another clinician for advice               | Access to other HCPs (4)                                                              |

|     |                                                                                                                   |                                                                                     |
|-----|-------------------------------------------------------------------------------------------------------------------|-------------------------------------------------------------------------------------|
|     | on diet as needed                                                                                                 |                                                                                     |
| F11 | Developing rapport with people made it easier to discuss weight management                                        | Factors that could ease the way to discussing weight (8)                            |
| F12 | Getting buy-in (engaging people in management) critical to improving outcomes                                     | Importance of high patient adherence or engagement for effectiveness of LIs (3)     |
| F13 | Playing a role in promoting engagement in management                                                              | Perception of own role potentially stimulating prescription or follow-up of LIs (2) |
| F14 | Education contributed to buy-in to treatment (pathology, consequences, treatments)                                | High health literacy or importance of education (3)                                 |
| F15 | Tailoring treatment to a person's goals/interests                                                                 | Ability and importance of providing personalized treatment within LIs (1)           |
| F16 | Need to consider personal context by integrating people's home exercises into daily activities/other life demands | Ability and importance of providing personalized treatment within LIs (1)           |
| F17 | Improve people's symptoms early in treatment (to gain buy-in)                                                     | LIs have positive effects on affected joint(s) (1)                                  |
| F18 | Having positive attitude/being encouraging of small changes/being hopeful about OA management                     | Importance of communication and relationship (8)                                    |
| U1  | Driven by their professional experience of what does and doesn't work/trial and error                             | Clinical experience (2)                                                             |
| U2  | Treatments were based more on what works clinically (opposed to scientific evidence)                              | Clinical experience (2)                                                             |
| U3  | Treatment decisions depended on people's symptoms/findings of physical assessment                                 | Severity of disease and symptoms (3)                                                |

### Mann (2011) [42]

| Number | Description                                                                                                        | Subcategory (domain)                                                    |
|--------|--------------------------------------------------------------------------------------------------------------------|-------------------------------------------------------------------------|
| B1     | Insufficient information for OA patients (e.g. not providing leaflets)                                             | Low health literacy (3)                                                 |
| B2     | Doubts about patients' willingness to make behavioral changes                                                      | Negative attitude toward LIs (3)                                        |
| B3     | Unrealistic expectations of the outcome of joint replacement among patients                                        | Positive attitude toward TJA (3)                                        |
| B4     | OA was not given enough attention, symptoms were often dismissed/minimized in health care                          | OA seen as low priority (9)                                             |
| B5     | Lack of provision for patients who were not candidates for surgery (too long without help)                         | Non-optimal interdisciplinary collaboration or healthcare provision (4) |
| B6     | Patients lacked proactive follow-up to support self-management                                                     | Non-optimal interdisciplinary collaboration or healthcare provision (4) |
| B7     | Lack of time to give patients sufficient opportunity to discuss their condition                                    | Lack of time within patient consultations (5)                           |
| B8     | General lack of expertise/interest in OA (that could lead to inappropriate referral/suboptimal access to services) | Lack of knowledge or skills around OA care in general (2)               |
| B9     | Lack of facilities to promote continuing exercise in community                                                     | LIs are unavailable or inaccessible (1)                                 |
| B10    | Lack of coordination between leisure, social and health services                                                   | Non-optimal interdisciplinary collaboration or healthcare provision (4) |
| B11    | Wait for physiotherapy was too long                                                                                | LIs are unavailable or inaccessible (1)                                 |
| B12    | Insufficient (physiotherapy) intervention when patients were seen                                                  | Non-optimal interdisciplinary collaboration or healthcare provision (4) |
| B13    | Belief that physiotherapists did not find it rewarding/interesting to treat OA patients                            | Non-optimal interdisciplinary collaboration or healthcare provision (4) |

|    |                                                                                                                   |                                                                                                  |
|----|-------------------------------------------------------------------------------------------------------------------|--------------------------------------------------------------------------------------------------|
| F1 | Need for early education about OA/self-management and treatment options and opportunity to discuss these          | High health literacy or importance of education (3)                                              |
| F2 | Patients would be better served by long-term condition model of care (e.g. diabetes mellitus)                     | Good interdisciplinary collaboration or healthcare provision, or suggestions for improvement (4) |
| F3 | Patients should initiate own follow-up when needed (as better use of time/health care resources)                  | Good interdisciplinary collaboration or healthcare provision, or suggestions for improvement (4) |
| F4 | Allow patients, after initial referral, to use direct access system to service (no need for re-referral)          | Good interdisciplinary collaboration or healthcare provision, or suggestions for improvement (4) |
| F5 | Care could be improved if every GP practice contained an individual who took a particular interest in OA          | Access to other HCPs (4)                                                                         |
| F6 | There should be OA specialist clinicians (all relevant allied health professions) providing services in community | Access to other HCPs (4)                                                                         |

### Miller (2020) [43]

| Number | Description                                                                                                     | Subcategory (domain)                                           |
|--------|-----------------------------------------------------------------------------------------------------------------|----------------------------------------------------------------|
| B1     | No effective treatment options                                                                                  | OA seen as untreatable and local condition (wear-and-tear) (9) |
| B2     | Patients don't want to expend effort towards lifestyle change                                                   | Negative attitude toward LIs (3)                               |
| B3     | Lifestyle counseling is huge time commitment                                                                    | Lack of time within patient consultations (5)                  |
| B4     | Difficulty convincing patients to consider non-surgical, non-medication treatments                              | Low health literacy (3)                                        |
| B5     | Lack of physician education on OA care                                                                          | Lack of knowledge or skills around OA care in general (2)      |
| B6     | Patient body weight (overweight/obese) (impedes exercise/makes visits to services more difficult)               | Negative impact of comorbidities (3)                           |
| B7     | Costs related to weight loss can be prohibitive for patients with limited resources (financial burdens)         | Limited financial resources (3)                                |
| B8     | Lack of patient self-efficacy (regarding lifestyle changes)                                                     | Low health literacy (3)                                        |
| B9     | Patients delay care until they are highly symptomatic (missing opportunities to slow disease progression)       | Severity of disease and symptoms (3)                           |
| B10    | Lack of knowledge about OA (patient barrier)                                                                    | Low health literacy (3)                                        |
| B11    | Costs to patients (lack of insurance coverage/high co-pays for specific services/time off work/travel expenses) | Costs of LIs to patients (1)                                   |
| B12    | Inaccessible treatment options within organization                                                              | LIs are unavailable or inaccessible (1)                        |
| B13    | Lack of resources for face-to-face patient education and patient reference                                      | Lack of information resources (5)                              |
| B14    | Challenges when coordinating multimodal care (including difficulties with the referral system)                  | Challenges of communication and referral procedures (4)        |
| B15    | Appointment times too short to address all of patient's issues and provide lifestyle counseling                 | Lack of time within patient consultations (5)                  |
| B16    | Difficulty finding high quality, patient-friendly OA educational materials                                      | Challenges in accessing information resources (5)              |

|     |                                                                                                             |                                                                                                  |
|-----|-------------------------------------------------------------------------------------------------------------|--------------------------------------------------------------------------------------------------|
| B17 | Frustration that material found on Internet or provided by friends/family was frequently inaccurate         | Challenges in accessing information resources (5)                                                |
| B18 | Surgical methods have the best outcomes                                                                     | LIs have little or no effect on OA (1)                                                           |
| B19 | Changing own practice style remained as barrier after OA training                                           | Perception of own role potentially impeding prescription or follow-up of LIs (2)                 |
| F1  | Importance of provider knowledge regarding OA management                                                    | Having or improving knowledge or skills around OA care in general (2)                            |
| F2  | Physical therapy helpful for patients most of the time                                                      | LIs have positive effects (not further specified) (1)                                            |
| F3  | Utilising clinic health educator who met with patients for weight loss discussions and followed up by phone | Good interdisciplinary collaboration or healthcare provision, or suggestions for improvement (4) |
| F4  | Employing a multi-pronged approach to engage patients in weight loss                                        | Good interdisciplinary collaboration or healthcare provision, or suggestions for improvement (4) |
| F5  | Patients who are well insured have improved access to services (e.g. physical therapy)                      | Benefits of good health insurance (7)                                                            |
| F6  | Physician education on OA management can affect both provider and patient attitudes                         | Having or improving knowledge or skills around OA care in general (2)                            |
| F7  | Reframe discussions around exercise and weight loss (e.g. not blaming/discouraging people)                  | Factors that could ease the way to discussing weight (8)                                         |
| F8  | Recommending informational materials for patients (to mitigate delays in OA care)                           | Availability of information resources (5)                                                        |
| F9  | Standardised flowsheet on OA management (as guide for providers/tool for patient discussions)               | Availability of information resources (5)                                                        |
| F10 | Electronic reminders for physicians on how to locate OA treatment information and resources                 | Potential use of information technology (5)                                                      |

Nielsen (2014) [44]

| Number | Description                                                                                                         | Subcategory (domain)                                                      |
|--------|---------------------------------------------------------------------------------------------------------------------|---------------------------------------------------------------------------|
| B1     | Concerns about capacity to learn/not having skills to fulfill study expectations/deal with challenging patients     | Lack of knowledge or skills around LIs or promoting behavioral change (2) |
| B2     | Requirements of RCT potentially created a barrier to responding to where the client was                             | Insufficient ability to provide personalized treatment within LIs (1)     |
| B3     | Difficulty for patients with PCST component (cognitive restructuring techniques)                                    | Challenges for patients during participation in LIs (1)                   |
| B4     | Not have sufficient skills to present PCST component (cognitive restructuring techniques) effectively               | Lack of knowledge or skills around LIs or promoting behavioral change (2) |
| B5     | Some process skills were dissimilar to pre-existing clinical communication skills and challenging to use            | Lack of knowledge or skills around LIs or promoting behavioral change (2) |
| B6     | Time required to teach PCST skills to patients                                                                      | Lack of time within patient consultations (5)                             |
| B7     | Concern about capacity to recover costs of incorporating CBT into practice                                          | Limited financial resources within organization (5)                       |
| B8     | Lack of knowledge about CBT (necessary to participate in training/RCT to fully appreciate value of CBT to practice) | Lack of knowledge or skills around LIs or promoting behavioral change (2) |
| B9     | Public expectation of what physical therapy treatment should be (e.g. didn't come to have thinking challenged)      | Negative attitude toward LIs (3)                                          |

|     |                                                                                                                    |                                                                                         |
|-----|--------------------------------------------------------------------------------------------------------------------|-----------------------------------------------------------------------------------------|
| F1  | Training workshop as good introduction to content and process of delivering PCST program                           | Ease for HCPs during delivery of LIs (1)                                                |
| F2  | Weekly group interaction crucial to being able to deliver intervention effectively/problem-solve issues            | Ease for HCPs during delivery of LIs (1)                                                |
| F3  | Input from supervising psychologist crucial to being able to deliver intervention effectively/problem-solve issues | Ease for HCPs during delivery of LIs (1)                                                |
| F4  | Would have liked more role-playing experience prior to beginning trial treatments                                  | Ease for HCPs during delivery of LIs (1)                                                |
| F5  | Favorably comments on program content (positive way to help people be proactive about their pain)                  | Positive experiences with or suggestions to improve the content or structure of LIs (1) |
| F6  | Opportunity to review PCST skills and learn more structured/deliberate ways of incorporating these into practice   | Having or improving knowledge or skills around LIs or promoting behavioral change (2)   |
| F7  | Some modules worked better than others (depending on the individual patient and context)                           | Ability and importance of providing personalized treatment within LIs (1)               |
| F8  | Importance of PCST component (cognitive restructuring techniques)                                                  | Positive experiences with or suggestions to improve the content or structure of LIs (1) |
| F9  | Structure of PCST sessions (overview/practice review/covering new skill/practice planning) worked well             | Positive experiences with or suggestions to improve the content or structure of LIs (1) |
| F10 | Regular group meetings were considered very important (if not essential) for delivery of PCST program              | Ease for HCPs during delivery of LIs (1)                                                |
| F11 | Value of having a psychologist involved throughout the program, their professional input was helpful               | Ease for HCPs during delivery of LIs (1)                                                |
| F12 | Expecting to utilize/continue integrating PCST in general clinical work as physical therapist (beyond the study)   | Positive attitude toward LIs (2)                                                        |
| F13 | The belief that a more flexible approach responsive to patient needs was required in their practice                | Ability and importance of providing personalized treatment within LIs (1)               |
| F14 | Increasing confidence in using PCST skills over the course of the study                                            | Having or improving knowledge or skills around LIs or promoting behavioral change (2)   |
| F15 | Improved interpersonal skills with general clinical patients as a result of participating in the study             | Having or improving knowledge or skills around LIs or promoting behavioral change (2)   |
| F16 | Value of increasing profession's explicit understanding/use of PCST skills (practice model may be required)        | Adequate professional paradigm or suggestions for expansion (6)                         |
| F17 | Incorporating selected PCST components on as-needed basis most practical way within current environment            | Adequate duration of specific interventions or protocols (5)                            |
| F18 | Value of incorporating aspects of PCST mind-set into professional training (entry-level vs. postgraduate level)    | Adequate professional paradigm or suggestions for expansion (6)                         |

Okwera (2019) [45]

| Number | Description                                                                                                    | Subcategory (domain)                                                                             |
|--------|----------------------------------------------------------------------------------------------------------------|--------------------------------------------------------------------------------------------------|
| B1     | Incurable nature and negative prognosis of OA                                                                  | OA seen as untreatable and local condition (wear-and-tear) (9)                                   |
| B2     | Medical professionals saw OA as low priority with respect to managing their workload                           | OA seen as low priority (9)                                                                      |
| B3     | Frustrations about restrictive referral pathways                                                               | Challenges of communication and referral procedures (4)                                          |
| B4     | Frustrations about lack of autonomy with decision-making                                                       | Negative attitude toward guidelines or protocols (2)                                             |
| B5     | Only two GPs had clear understanding of clinical guidelines on OA                                              | Lack of knowledge or skills around OA care in general (2)                                        |
| B6     | Negativity toward guidelines (clinical reasoning more important)                                               | Negative attitude toward guidelines or protocols (2)                                             |
| B7     | Feeling that patients tended to prefer treatment administered to them                                          | Negative attitude toward LIs (3)                                                                 |
| B8     | Lack of compliance with home exercise regimes and advice given to patients was common                          | Low patient adherence or engagement (3)                                                          |
| B9     | Lack of confidence in clinical effectiveness of physiotherapy treatments                                       | LIs have little or no effect on OA (1)                                                           |
| B10    | Negative comments about patient reports of a lack of "hands-on" physiotherapy                                  | Negative attitude toward LIs (3)                                                                 |
| B11    | Criticizing the decision to centralize musculoskeletal physiotherapy service (useful to have somebody in team) | Non-optimal interdisciplinary collaboration or healthcare provision (4)                          |
| B12    | Frustrations about lack of continuity regarding team of physiotherapists within clinic                         | Non-optimal interdisciplinary collaboration or healthcare provision (4)                          |
| B13    | Frustrations about lack of contact/communication involved in the referral and discharge process                | Lack of communication between HCPs (4)                                                           |
| B14    | Referral process was convoluted and at times irrelevant                                                        | Challenges of communication and referral procedures (4)                                          |
| B15    | Not working closely with physiotherapists/frustrations about working relationship                              | Non-optimal interdisciplinary collaboration or healthcare provision (4)                          |
| B16    | Dissatisfaction about loss of communication since centralizing musculoskeletal physiotherapy service           | Lack of communication between HCPs (4)                                                           |
| B17    | Dissatisfaction about loss of coherent working since centralizing musculoskeletal physiotherapy service        | Non-optimal interdisciplinary collaboration or healthcare provision (4)                          |
| F1     | There is place for each (self-management programs/physiotherapy/orthopedic consultants) in OA management       | Positive attitude toward LIs (2)                                                                 |
| F2     | Positivity toward private sector (patients will get seen a lot quicker)                                        | Benefits of good health insurance (7)                                                            |
| F3     | Reasonable understanding of role physiotherapy plays in management of lower-limb OA                            | Having or improving knowledge or skills around LIs or promoting behavioral change (2)            |
| F4     | Overall positive experience of physiotherapy service and therapists                                            | Good interdisciplinary collaboration or healthcare provision, or suggestions for improvement (4) |
| F5     | Need for improving communication (quality of referrals, information at discharge)                              | Improving communication between HCPs (4)                                                         |
| F6     | In-house physiotherapy (as suggestion for physiotherapy service improvement)                                   | Access to other HCPs (4)                                                                         |
| F7     | Streamlining the physiotherapy referral process (as suggestion for physiotherapy service improvement)          | Needs regarding communication and referral procedures (4)                                        |
| F8     | Training sessions (as suggestion for physiotherapy service improvement)                                        | Having or improving knowledge or skills around OA care in general (2)                            |
| F9     | Triage service (as suggestion for physiotherapy service improvement)                                           | LIs are available or accessible, or suggestions for improvement (1)                              |
| F10    | Private healthcare supplementation (as suggestion for physiotherapy service improvement)                       | Benefits of good health insurance (7)                                                            |



1  
2  
3  
4  
5  
6  
7  
8  
9  
10  
11  
12  
13  
14  
15  
16  
17  
18  
19  
20  
21  
22  
23  
24  
25  
26  
27  
28  
29  
30  
31  
32  
33  
34  
35  
36  
37  
38  
39  
40  
41  
42  
43  
44  
45  
46

|     |                                                                                         |                                                                     |
|-----|-----------------------------------------------------------------------------------------|---------------------------------------------------------------------|
| F11 | A web-based physiotherapy service (as suggestion for physiotherapy service improvement) | LIs are available or accessible, or suggestions for improvement (1) |
| F12 | Reduced waiting times (as suggestion for physiotherapy service improvement)             | LIs are available or accessible, or suggestions for improvement (1) |
| U1  | Management strategies depended on what the person wants                                 | Patients' preferences (3)                                           |
| U2  | Management strategies depended on what the person can cope with                         | Health literacy (3)                                                 |
| U3  | Management strategies depended on how bad the knee is                                   | Severity of disease and symptoms (3)                                |

Poitras (2010) [46]

| Number | Description                                                                                                  | Subcategory (domain)                                                             |
|--------|--------------------------------------------------------------------------------------------------------------|----------------------------------------------------------------------------------|
| B1     | Knee OA seen as uninteresting health problem on which they had limited impact and could not cure             | OA seen as untreatable and local condition (wear-and-tear) (9)                   |
| B2     | Knee OA more often diagnosed as an unanticipated comorbidity (rarely primary reason for consultation)        | OA seen as low priority (9)                                                      |
| B3     | Not enough emphasis put on primary prevention of knee OA                                                     | OA seen as low priority (9)                                                      |
| B4     | Most GPs believed their contribution was essentially limited to diagnosis of condition and medication        | Perception of own role potentially impeding prescription or follow-up of LIs (2) |
| B5     | Knee OA management seen as unchallenging routine                                                             | OA seen as low priority (9)                                                      |
| B6     | Rehabilitation potential depended on length of disability (less potential with late management)              | Severity of disease and symptoms (3)                                             |
| B7     | Benefits obtained in the long term, which often conflicted with patient expectations for short-term benefits | Negative attitude toward LIs (3)                                                 |
| B8     | Paracetamol could mask pain/underlying physical problem (reducing opportunity to assess/manage problem)      | Severity of disease and symptoms (3)                                             |
| B9     | Potential further damage to the knee due to activity                                                         | LIs are unsafe or have negative effects (1)                                      |
| B10    | Difficult to obtain effective analgesia with some patients                                                   | Severity of disease and symptoms (3)                                             |
| B11    | Lack of patient motivation in remaining active despite knee OA                                               | Negative attitude toward LIs (3)                                                 |
| B12    | Person had been sedentary throughout life                                                                    | Other patient characteristics (3)                                                |
| B13    | Potential to create unrealistic expectations and discouragement in patients that were too disabled           | Severity of disease and symptoms (3)                                             |
| B14    | Patient views and expectations rarely matched patient needs                                                  | Negative attitude toward LIs (3)                                                 |
| B15    | Questioning capacity to perform regular exercise because of severity of disability                           | Severity of disease and symptoms (3)                                             |
| B16    | Questioning capacity to perform regular exercise because of age                                              | Other patient characteristics (3)                                                |
| B17    | Questioning capacity to perform regular exercise because of general health                                   | Negative impact of comorbidities (3)                                             |
| B18    | Questioning capacity to perform regular exercise because of motivation                                       | Negative attitude toward LIs (3)                                                 |
| B19    | Disagreement on effective exercise parameters                                                                | Non-optimal interdisciplinary collaboration or healthcare provision (4)          |
| B20    | Disagreement on optimal design of exercise programs to increase adherence                                    | Non-optimal interdisciplinary collaboration or healthcare provision (4)          |

|     |                                                                                                                 |                                                                                                  |
|-----|-----------------------------------------------------------------------------------------------------------------|--------------------------------------------------------------------------------------------------|
| B21 | Unclear on amount and type of activity necessary to obtain benefits without further damaging the knee           | Lack of knowledge or skills around LIs or promoting behavioral change (2)                        |
| B22 | Most patients demonstrated fatalism/inadequate knowledge and beliefs related to knee OA management              | Low health literacy (3)                                                                          |
| B23 | Patients' adherence to management recommendations was limited (because of fatalism)                             | Low patient adherence or engagement (3)                                                          |
| B24 | Limited impact of weight loss on established knee OA (more effective as a primary prevention strategy)          | LIs have little or no effect on OA (1)                                                           |
| B25 | Questioning direct relationship between weight and knee OA (numerous other factors associated)                  | LIs have little or no effect on OA (1)                                                           |
| B26 | Knee pain restricts activities in general (which makes weight loss difficult)                                   | Severity of disease and symptoms (3)                                                             |
| B27 | Patients with knee OA tended to be older/less active/with slower metabolism (which makes weight loss difficult) | Other patient characteristics (3)                                                                |
| B28 | Weight loss is difficult (multiplicity of factors need to be addressed, often involving change in lifestyle)    | Potential effects of LIs are difficult to accomplish (1)                                         |
| F1  | Knee OA seen as technically challenging condition                                                               | Optimistic views toward OA (9)                                                                   |
| F2  | Necessity of physiotherapy to effectively rehabilitate knee OA patients (because of knowledge/availability)     | Perception of own role potentially stimulating prescription or follow-up of LIs (2)              |
| F3  | Rehabilitation potential depended on length of disability (better outcomes with early management)               | Severity of disease and symptoms (3)                                                             |
| F4  | Many interventions should be used before resorting to medication (including physiotherapy)                      | Positive attitude toward LIs (2)                                                                 |
| F5  | Other interventions (including physiotherapy) should be used before paracetamol                                 | Positive attitude toward LIs (2)                                                                 |
| F6  | NSAIDs alone are not sufficient to appropriately treat inflammation and have to be combined with physiotherapy  | Positive attitude toward LIs (2)                                                                 |
| F7  | Importance of PT's role in educating patients with regards to NSAIDs/alternatives (including physiotherapy)     | Perception of own role potentially stimulating prescription or follow-up of LIs (2)              |
| F8  | Benefits of activity on knee mobility                                                                           | LIs have positive effects on affected joint(s) (1)                                               |
| F9  | Benefits of activity on general wellbeing                                                                       | LIs have positive effects on general health (1)                                                  |
| F10 | Effective analgesia necessary for patients to be able to accomplish activities                                  | Severity of disease and symptoms (3)                                                             |
| F11 | Patients should be encouraged to resume/maintain daily activities                                               | Positive attitude toward LIs (2)                                                                 |
| F12 | Necessity of PT involvement in managing activity (because potentially detrimental if excessive)                 | Perception of own role potentially stimulating prescription or follow-up of LIs (2)              |
| F13 | GPs believed PT involvement was necessary to motivate the patient and manage the exercise program               | Good interdisciplinary collaboration or healthcare provision, or suggestions for improvement (4) |
| F14 | Exercise planning is usually PT's role (rather than GP's)                                                       | Perception of own role potentially stimulating prescription or follow-up of LIs (2)              |
| F15 | Exercise programs have to be individualized to each patient by the PT                                           | Ability and importance of providing personalized treatment within LIs (1)                        |

1  
2  
3  
4  
5  
6  
7  
8  
9  
10  
11  
12  
13  
14  
15  
16  
17  
18  
19  
20  
21  
22  
23  
24  
25  
26  
27  
28  
29  
30  
31  
32  
33  
34  
35  
36  
37  
38  
39  
40  
41  
42  
43  
44  
45  
46

|     |                                                                                                                    |                                                                                     |
|-----|--------------------------------------------------------------------------------------------------------------------|-------------------------------------------------------------------------------------|
| F16 | Necessity of PT follow-up sessions to assess and encourage patient adherence                                       | Perception of own role potentially stimulating prescription or follow-up of LIs (2) |
| F17 | Activity necessary for the knee's health                                                                           | LIs have positive effects on affected joint(s) (1)                                  |
| F18 | PT's role to individualize patients' activity according to needs and capacity                                      | Perception of own role potentially stimulating prescription or follow-up of LIs (2) |
| F19 | Necessity of patients' active participation in knee OA management (to achieve significant outcomes)                | Importance of high patient adherence or engagement for effectiveness of LIs (3)     |
| F20 | Although agreeing with active patient participation, it is ultimately PT's role to appropriately manage patients   | Perception of own role potentially stimulating prescription or follow-up of LIs (2) |
| F21 | Weight loss effective at improving mobility in general                                                             | LIs have positive effects on general health (1)                                     |
| F22 | Weight loss improves pain and joint function                                                                       | LIs have positive effects on affected joint(s) (1)                                  |
| F23 | Relationship with patients, developed through numerous sessions, facilitated influence for lifestyle modifications | Factors that could ease the way to discussing weight (8)                            |
| F24 | Weight loss also benefits mobility in general                                                                      | LIs have positive effects on general health (1)                                     |

Rosemann (2006) [47]

| Number | Description                                                                                                       | Subcategory (domain)                                                             |
|--------|-------------------------------------------------------------------------------------------------------------------|----------------------------------------------------------------------------------|
| B1     | Depression as important barrier to motivate patients to physical exercise                                         | Negative impact of comorbidities (3)                                             |
| B2     | Feeling pressure by patients to refer them to specialist                                                          | Positive attitude toward TJA (3)                                                 |
| B3     | Specialist did not take time to explain what they had examined/x-rays he had taken                                | Lack of communication between HCPs (4)                                           |
| B4     | Treatments (e.g. physiotherapy) prescribed less frequently due to decreasing financial resources                  | Limited financial resources within organization (5)                              |
| B5     | Treatments (e.g. physiotherapy) prescribed less frequently due to increasing restrictions by health insurances    | Restrictions due to health insurance (7)                                         |
| B6     | Not focusing on increasing patients' motivation for behavioural change, but just giving general recommendations   | Perception of own role potentially impeding prescription or follow-up of LIs (2) |
| B7     | Success rate in motivating patients too low (distinctly resigned regarding their impact on patients' life style)  | Negative attitude toward LIs (3)                                                 |
| B8     | Vicious circle (pain when exercising, people move less/eat more due to frustration/sometimes depression)          | Potential effects of LIs are difficult to accomplish (1)                         |
| B9     | Belief that nobody is willing to change lifestyle due to OA, disease has to be a lot worse                        | OA seen as low priority (9)                                                      |
| B10    | Lack of information about self-help groups/offers on community level                                              | Lack of information resources (5)                                                |
| B11    | Frustration about impact of information (e.g. self-help groups) (lot of patients find excuses not to participate) | Negative attitude toward LIs (3)                                                 |
| B12    | Missing information about offers e.g. in the community                                                            | Lack of information resources (5)                                                |
| B13    | Lack of time                                                                                                      | Lack of time due to other demands (or not further specified) (5)                 |

|     |                                                                                                             |                                                                                                  |
|-----|-------------------------------------------------------------------------------------------------------------|--------------------------------------------------------------------------------------------------|
| B14 | No knowledge about treatment                                                                                | Lack of knowledge or skills around OA care in general (2)                                        |
| F1  | Gate keeper role for GPs could reduce patients' pressure to refer to orthopaedics/decrease performed x-rays | Good interdisciplinary collaboration or healthcare provision, or suggestions for improvement (4) |
| F2  | Better communication with specialists could increase efficacy of treatment                                  | Improving communication between HCPs (4)                                                         |
| F3  | Payment system has to be changed to upgrade conservative treatments and conversation with patient           | Financial reward for implementing LIs (5)                                                        |
| F4  | Involvement of practice nurses is imaginable in the area of life style counselling and advice giving        | Good interdisciplinary collaboration or healthcare provision, or suggestions for improvement (4) |
| F5  | Interventions performed by practice nurses have to be reinsured sufficiently                                | Financial reward for implementing LIs (5)                                                        |
| F6  | Desire to be more involved in life style counselling (upgrade of profession)                                | Perception of own role potentially stimulating prescription or follow-up of LIs (2)              |
| F7  | Knowledge about treatment                                                                                   | Having or improving knowledge or skills around OA care in general (2)                            |
| F8  | Integrating patients' social system into treatment                                                          | Social support (3)                                                                               |
| F9  | More openly address psychological complaints of patients                                                    | Importance of communication and relationship (8)                                                 |

### Selten (2017) [48]

| Number | Description                                                                                            | Subcategory (domain)                                                             |
|--------|--------------------------------------------------------------------------------------------------------|----------------------------------------------------------------------------------|
| B1     | Ambivalent about patients' ability to lose weight (not able to succeed in making lifestyle changes)    | Low health literacy (3)                                                          |
| B2     | Mistrust in interventions dieticians use to help patients' with weight reduction attempts              | Non-optimal interdisciplinary collaboration or healthcare provision (4)          |
| B3     | Mentioning benefits of weight reduction, but not actively coaching or referring patients               | Perception of own role potentially impeding prescription or follow-up of LIs (2) |
| B4     | The belief that patients are not capable of losing weight                                              | Low health literacy (3)                                                          |
| B5     | Weight reduction advice takes too much time in a consultation                                          | Lack of time within patient consultations (5)                                    |
| B6     | Not perceiving weight reduction advice as their responsibility                                         | Perception of own role potentially impeding prescription or follow-up of LIs (2) |
| B7     | Difficulties in communicating with patients about being overweight                                     | Challenges of discussing weight (8)                                              |
| B8     | Uncertainties about dosage/frequency/type of physical activity                                         | Lack of knowledge or skills around LIs or promoting behavioral change (2)        |
| B9     | Less certain about effectiveness of physical therapy (benefits variable or difficult to prove)         | LIs have little or no effect on OA (1)                                           |
| B10    | Negative views about physical therapists who provided non-evidence-based treatments                    | Non-optimal interdisciplinary collaboration or healthcare provision (4)          |
| B11    | Mistrust because they observed huge differences in quality of care delivered by physical therapists    | Non-optimal interdisciplinary collaboration or healthcare provision (4)          |
| B12    | Occupational therapists, podiatrists and physical therapists do not work together optimally in OA care | Non-optimal interdisciplinary collaboration or healthcare provision (4)          |
| B13    | Role of rheumatologist in knee/hip OA care perceived as unclear/limited                                | Non-optimal interdisciplinary collaboration or healthcare provision (4)          |

|     |                                                                                                                |                                                                                                  |
|-----|----------------------------------------------------------------------------------------------------------------|--------------------------------------------------------------------------------------------------|
| B14 | Agreement that orthopedic surgeon's primary task is to assess whether patient is eligible for surgery          | Non-optimal interdisciplinary collaboration or healthcare provision (4)                          |
| B15 | Orthopedic surgeons were perceived negatively by several healthcare providers                                  | Non-optimal interdisciplinary collaboration or healthcare provision (4)                          |
| F1  | Benefits of weight reduction for relieving symptoms of knee/hip OA                                             | LIs have positive effects on affected joint(s) (1)                                               |
| F2  | Ambivalent about patients' ability to lose weight (able)                                                       | High health literacy or importance of education (3)                                              |
| F3  | Dieticians are helpful for patients trying to lose weight                                                      | Good interdisciplinary collaboration or healthcare provision, or suggestions for improvement (4) |
| F4  | Having a relationship with patient built on mutual trust/respect would ease way to discussing weight reduction | Factors that could ease the way to discussing weight (8)                                         |
| F5  | Value of lifestyle advice related to knee and hip OA                                                           | LIs have positive effects (not further specified) (1)                                            |
| F6  | Beneficial effects of physical therapy in reducing pain/stiffness and potential effects on cartilage           | LIs have positive effects on affected joint(s) (1)                                               |
| F7  | Beneficial effects of physical therapy in reducing weight and for increasing mobility/posture/coordination     | LIs have positive effects on general health (1)                                                  |
| F8  | Physical therapy useful in increasing patients self-management in coping with/acceptance of symptoms           | LIs have positive mental effects (1)                                                             |
| F9  | Need for physical therapists to provide evidence-based exercises instead of non-evidence-based modalities      | Good interdisciplinary collaboration or healthcare provision, or suggestions for improvement (4) |
| F10 | Non-pharmacological, non-surgical treatment was considered useful to delay surgery                             | LIs have positive effects (not further specified) (1)                                            |
| F11 | Good communication with patient may help in delaying surgery                                                   | Importance of communication and relationship (8)                                                 |
| F12 | Straightforward, easy and quick lines of communication among different disciplines in healthcare center        | Needs regarding communication and referral procedures (4)                                        |
| F13 | Collaboration among multiple disciplines could be facilitated by working in a health center                    | Benefits of working in health centers (5)                                                        |
| F14 | Non-pharmacological, non-surgical OA care can and should be provided in a primary care setting                 | Good interdisciplinary collaboration or healthcare provision, or suggestions for improvement (4) |
| F15 | GPs have coordinating role (diagnose/monitor, refer when necessary, lifestyle education, long-term coach)      | Good interdisciplinary collaboration or healthcare provision, or suggestions for improvement (4) |
| F16 | Importance of having trust                                                                                     | Importance of communication and relationship (8)                                                 |
| F17 | Physical therapists can guide patients/provide lifestyle advice (more time compared with GPs)                  | Good interdisciplinary collaboration or healthcare provision, or suggestions for improvement (4) |
| F18 | Perceiving rheumatologists' role as valuable (giving injections, providing lifestyle/medication advice, refer) | Good interdisciplinary collaboration or healthcare provision, or suggestions for improvement (4) |

### Tang (2020) [49]

| Number | Description                                             | Subcategory (domain)                                      |
|--------|---------------------------------------------------------|-----------------------------------------------------------|
| B1     | Inability to discuss specific details of ACSM guideline | Lack of knowledge or skills around specific resources (2) |

|     |                                                                                                                  |                                                                                       |
|-----|------------------------------------------------------------------------------------------------------------------|---------------------------------------------------------------------------------------|
| B2  | Pain (main barrier resulting in reduced dosage prescription of strengthening exercises)                          | Severity of disease and symptoms (3)                                                  |
| B3  | Patient's ability to exercise (main barrier resulting in reduced dosage prescription of strengthening exercises) | Severity of disease and symptoms (3)                                                  |
| B4  | Unaware about practice guidelines in relation to aerobic exercise prescription/weight loss/pain management       | Lack of knowledge or skills around LIs or promoting behavioral change (2)             |
| B5  | Knowledge about BMI/weight management was particularly poor (e.g. relying on visual estimations)                 | Lack of knowledge or skills around LIs or promoting behavioral change (2)             |
| B6  | Limited knowledge of how to address weight management                                                            | Lack of knowledge or skills around LIs or promoting behavioral change (2)             |
| B7  | Pain (key barrier to prescription of exercise as recommended by CPGs)                                            | Severity of disease and symptoms (3)                                                  |
| B8  | Less awareness about aerobic exercise prescription                                                               | Lack of knowledge or skills around LIs or promoting behavioral change (2)             |
| B9  | Pain (barrier to prescription of aerobic exercise)                                                               | Severity of disease and symptoms (3)                                                  |
| B10 | Uncertainty over scope of practice/questioning whether weight and pain management fall outside scope             | Perception of own role potentially impeding prescription or follow-up of LIs (2)      |
| B11 | Reduced confidence with recommending individual weight/pain management plans (discuss in general terms)          | Lack of knowledge or skills around LIs or promoting behavioral change (2)             |
| B12 | Viewing weight as sensitive subject/feeling uncomfortable discussing it                                          | Challenges of discussing weight (8)                                                   |
| F1  | Knowledge/confidence in providing treatments related to strengthening and range of motion                        | Having or improving knowledge or skills around LIs or promoting behavioral change (2) |
| F2  | Being aware about ACSM guidelines                                                                                | Available resources might improve knowledge and decision-making (2)                   |
| F3  | Confident in providing justifications for non-routinely adhering to guidelines (range of motion exercises)       | Having or improving knowledge or skills around LIs or promoting behavioral change (2) |
| F4  | Knowing the importance of weight management for knee OA                                                          | Positive attitude toward LIs (2)                                                      |
| F5  | Being able to describe how they will manage pain during strengthening exercise                                   | Having or improving knowledge or skills around LIs or promoting behavioral change (2) |

### Teo (2020) [50]

| Number | Description                                                                                         | Subcategory (domain)                                                             |
|--------|-----------------------------------------------------------------------------------------------------|----------------------------------------------------------------------------------|
| B1     | Knee OA was perceived as a degenerative (wear and tear)                                             | OA seen as untreatable and local condition (wear-and-tear) (9)                   |
| B2     | Describing own role as prepping patients for knee surgery when they were referred for physiotherapy | Perception of own role potentially impeding prescription or follow-up of LIs (2) |
| B3     | Comorbidities (often more severe pain, hampering ability to exercise or be physically active)       | Negative impact of comorbidities (3)                                             |
| B4     | Patients' unsatisfactory adherence to exercise programs                                             | Low patient adherence or engagement (3)                                          |
| B5     | Self-motivation (intrinsic barrier for patient adherence)                                           | Negative attitude toward LIs (3)                                                 |

|     |                                                                                                                 |                                                                                     |
|-----|-----------------------------------------------------------------------------------------------------------------|-------------------------------------------------------------------------------------|
| B6  | Fear of falling (intrinsic barrier for patient adherence)                                                       | Low health literacy (3)                                                             |
| B7  | Fear of pain (intrinsic barrier for patient adherence)                                                          | Low health literacy (3)                                                             |
| B8  | Costs (extrinsic barrier for patient adherence)                                                                 | Costs of LIs to patients (1)                                                        |
| B9  | Weather (extrinsic barrier for patient adherence)                                                               | Inconvenience to patients when accessing LIs (1)                                    |
| B10 | Patient expectations (not keen to participate in exercise/play active role in management, desire for quick fix) | Negative attitude toward LIs (3)                                                    |
| B11 | Lack of confidence/knowledge/skills in implementing evidence into practice (e.g. weight management)             | Lack of knowledge or skills around LIs or promoting behavioral change (2)           |
| B12 | Advice about how to lose weight was limited to brief general advice                                             | Perception of own role potentially impeding prescription or follow-up of LIs (2)    |
| B13 | Considering weight loss to be outside own scope of practice (role of a dietician)                               | Perception of own role potentially impeding prescription or follow-up of LIs (2)    |
| B14 | Comfortable suggesting surgery to patients who responded poorly to conservative management                      | Perception of own role potentially impeding prescription or follow-up of LIs (2)    |
| F1  | Education focused on self-management strategies                                                                 | High health literacy or importance of education (3)                                 |
| F2  | Importance of evaluating a patient's overall functional ability (rather than only knee signs/symptoms)          | Other patient characteristics (3)                                                   |
| F3  | Perceiving exercise prescription to be their main role                                                          | Perception of own role potentially stimulating prescription or follow-up of LIs (2) |
| F4  | Importance of tailored exercise program                                                                         | Ability and importance of providing personalized treatment within LIs (1)           |
| F5  | Advising patients against surgery for as long as possible (last option)                                         | Perception of own role potentially stimulating prescription or follow-up of LIs (2) |
| F6  | Implementing several strategies to boost adherence                                                              | Perception of own role potentially stimulating prescription or follow-up of LIs (2) |
| F7  | Aware that being overweight/obese is risk factor for knee OA/losing weight is important                         | Positive attitude toward LIs (2)                                                    |
| F8  | Not their role to advise the patient about knee surgery, opting not to discuss surgery at all                   | Perception of own role potentially stimulating prescription or follow-up of LIs (2) |
| F9  | Advising patients against knee arthroscopy if specifically asked about this procedure                           | Perception of own role potentially stimulating prescription or follow-up of LIs (2) |

### Wallis (2020) [51]

| Number | Description                                                                        | Subcategory (domain)                             |
|--------|------------------------------------------------------------------------------------|--------------------------------------------------|
| B1     | Cost (program access barrier)                                                      | Costs of LIs to patients (1)                     |
| B2     | Transport, waiting time and parking related to attendance (program access barrier) | Inconvenience to patients when accessing LIs (1) |
| B3     | Geography (program access barrier)                                                 | Inconvenience to patients when accessing LIs (1) |
| B4     | Available session times (program access barrier)                                   | Inconvenience to patients when accessing LIs (1) |

|     |                                                                                                                       |                                                                                                  |
|-----|-----------------------------------------------------------------------------------------------------------------------|--------------------------------------------------------------------------------------------------|
| B5  | Using negative language to describe OA (wear-and-tear/joint damage/bone-on-bone/degenerative condition)               | OA seen as untreatable and local condition (wear-and-tear) (9)                                   |
| B6  | Existing comorbidities (patient-related barrier)                                                                      | Negative impact of comorbidities (3)                                                             |
| B7  | Osteoarthritis severity (mild/severe) (patient-related barrier)                                                       | Severity of disease and symptoms (3)                                                             |
| B8  | Lack of motivation to participate active lifestyle interventions (patient-related barrier)                            | Negative attitude toward LIs (3)                                                                 |
| B9  | Older age (patient-related barrier)                                                                                   | Other patient characteristics (3)                                                                |
| B10 | Language/different cultural backgrounds (patient-related barrier)                                                     | Low health literacy (3)                                                                          |
| B11 | Work/other commitments precluding exercise-therapy (patient-related barrier)                                          | Other responsibilities (3)                                                                       |
| B12 | Program factors (e.g. single discipline led intervention)                                                             | Non-optimal content or structure of LIs (1)                                                      |
| B13 | Existing relationships with physiotherapists (as barrier to referral if patient already had treating physiotherapist) | Negative attitude toward LIs (3)                                                                 |
| B14 | Urging caution to patients about participating in higher impact exercise/activities                                   | LIs are unsafe or have negative effects (1)                                                      |
| F1  | A more holistic program as part of a multidisciplinary model of service was preferred                                 | Positive experiences with or suggestions to improve the content or structure of LIs (1)          |
| F2  | Knowledge that program was delivered by well-trained and trusted physiotherapist                                      | Good interdisciplinary collaboration or healthcare provision, or suggestions for improvement (4) |
| F3  | Receiving communication back from program physiotherapist about patient outcomes                                      | Improving communication between HCPs (4)                                                         |
| F4  | Positive about program (alternative approach and opportunity to avoid a joint replacement)                            | LIs have positive effects (not further specified) (1)                                            |
| F5  | Exercise therapy may be effective by giving more muscular support for joints                                          | LIs have positive effects on affected joint(s) (1)                                               |
| F6  | Exercise therapy may be effective by giving opportunity to improve confidence about activities/mobility               | LIs have positive mental effects (1)                                                             |
| F7  | Value of program's structure and peer (group) support                                                                 | Positive experiences with or suggestions to improve the content or structure of LIs (1)          |
| F8  | Name of program ('Good Life with OsteoArthritis') implied optimism and positive outcome                               | Positive experiences with or suggestions to improve the content or structure of LIs (1)          |
| F9  | Received positive feedback from their patients about program                                                          | Positive experiences with or suggestions to improve the content or structure of LIs (1)          |
| F10 | Including links on websites of partners (suggestion for promotion and referrals)                                      | Access to information resources (5)                                                              |
| F11 | Simple, streamlined referral process (suggestion for promotion and referrals)                                         | Needs regarding communication and referral procedures (4)                                        |
| F12 | Close, convenient locations (suggestion for promotion and referrals)                                                  | Convenience for patients when accessing LIs (1)                                                  |
| F13 | Appropriate session times for working populations (suggestion for promotion and referrals)                            | Convenience for patients when accessing LIs (1)                                                  |
| F14 | Specific information about program (suggestion for promotion and referrals)                                           | Availability of information resources (5)                                                        |
| F15 | Providing trial of sessions to assist patients to get started (suggestion for promotion and referrals)                | Ease for patients during participation in LIs (1)                                                |
| F16 | Provision of free parking at health service (suggestion for promotion and referrals)                                  | Convenience for patients when accessing LIs (1)                                                  |



Cottrell (2016) [52]

| Number | Description                                                                                                 | Subcategory (domain)                                                                |
|--------|-------------------------------------------------------------------------------------------------------------|-------------------------------------------------------------------------------------|
| B1     | Insufficient time in consultations (*)                                                                      | Lack of time within patient consultations (5)                                       |
| B2     | Limitations to accessing services (e.g. lack of facilities, costs) (*)                                      | LIs are unavailable or inaccessible (1)                                             |
| B3     | Services do not meet expectations (*)                                                                       | Non-optimal content or structure of LIs (1)                                         |
| B4     | Geographical problems (e.g. remote location, scared to walk in local area) (*)                              | Inconvenience to patients when accessing LIs (1)                                    |
| B5     | Cannot access necessary resources (*)                                                                       | Challenges in accessing information resources (5)                                   |
| B6     | GP does not prioritise exercise (*)                                                                         | Negative attitude toward LIs (2)                                                    |
| B7     | Unclear what physio offers (*)                                                                              | Non-optimal interdisciplinary collaboration or healthcare provision (4)             |
| B8     | Exercise does not match patient needs/expectations (*)                                                      | Negative attitude toward LIs (3)                                                    |
| B9     | Achieving patient behavior change is difficult (*)                                                          | Potential effects of LIs are difficult to accomplish (1)                            |
| B10    | GPs should (perhaps) not follow-up patients to monitor extent of continuation of exercises (*)              | Perception of own role potentially impeding prescription or follow-up of LIs (2)    |
| B11    | It is the patient's own responsibility to continue doing their exercise programme (*)                       | Perception of own role potentially impeding prescription or follow-up of LIs (2)    |
| B12    | Increasing the overall activity levels does not/might not stop the knee problem getting worse (*)           | LIs have little or no effect on OA (1)                                              |
| B13    | Time constraints prevent GPs from providing advice on individual exercises for CKP (*)                      | Lack of time within patient consultations (5)                                       |
| F1     | Physiotherapy (referral) needs to be prioritised                                                            | Positive attitude toward LIs (2)                                                    |
| F2     | It is part of my job to reassure patients about the safety of exercise for CKP (*)                          | Perception of own role potentially stimulating prescription or follow-up of LIs (2) |
| F3     | Exercise for CKP is most beneficial when it is tailored to meet individual patient needs (*)                | Ability and importance of providing personalized treatment within LIs (1)           |
| F4     | A standard set of exercises is not/might not be sufficient for every patient with chronic knee problems (*) | Ability and importance of providing personalized treatment within LIs (1)           |
| F5     | GPs should educate patients with CKP about how to change their lifestyle for the better (*)                 | Perception of own role potentially stimulating prescription or follow-up of LIs (2) |
| F6     | It is important that people with CKP increase their overall activity levels (*)                             | Positive attitude toward LIs (2)                                                    |
| F7     | How well a patient complies with their exercise programme determines how effective it will be (*)           | Importance of high patient adherence or engagement for effectiveness of LIs (3)     |
| F8     | GPs should prescribe quadriceps strengthening exercises to every patient with CKP (*)                       | Perception of own role potentially stimulating prescription or follow-up of LIs (2) |
| F9     | GPs should prescribe general exercise (e.g. walking or swimming) for every patient with CKP (*)             | Perception of own role potentially stimulating prescription or follow-up of LIs (2) |
| F10    | Knee problems are improved by quadriceps strengthening exercises (*)                                        | LIs have positive effects on affected joint(s) (1)                                  |
| F11    | Knee problems are improved by general exercise (e.g. walking or swimming) (*)                               | LIs have positive effects on affected joint(s) (1)                                  |

|     |                                                                                                             |                                                                                                  |
|-----|-------------------------------------------------------------------------------------------------------------|--------------------------------------------------------------------------------------------------|
| F12 | Quadriceps strengthening exercises for the knee are safe for everybody to do (*)                            | LIs are safe (1)                                                                                 |
| F13 | General exercise (e.g. walking or swimming) is safe for everybody to do (*)                                 | LIs are safe (1)                                                                                 |
| F14 | Exercise is effective for patients if an X-ray shows severe knee OA (*)                                     | Severity of disease and symptoms (3)                                                             |
| F15 | Increasing the strength of the muscles around the knee stops the knee problem getting worse (*)             | LIs have positive effects on affected joint(s) (1)                                               |
| F16 | Exercise for CKP should (perhaps) preferably be used before drug treatment has been tried (*)               | Positive attitude toward LIs (2)                                                                 |
| F17 | Exercise for CKP is more effectively provided by physiotherapists than GPs (*)                              | Good interdisciplinary collaboration or healthcare provision, or suggestions for improvement (4) |
| U1  | Exercise does not/might not work just as well for everybody, regardless of the amount of pain they have (*) | Severity of disease and symptoms (3)                                                             |

#### Duarte (2019) [53]

| Number | Description                                                                               | Subcategory (domain)                                  |
|--------|-------------------------------------------------------------------------------------------|-------------------------------------------------------|
| B1     | Main concern was participant adherence to physical activity routines after end of program | Low patient adherence or engagement (3)               |
| F1     | Improvement in the physical condition of participants                                     | LIs have positive effects (not further specified) (1) |
| F2     | Enthusiastic participation of the participants                                            | High patient adherence or engagement (3)              |

#### Hill (2018) [54]

| Number | Description                                                                                                                                                                        | Subcategory (domain)                                                                             |
|--------|------------------------------------------------------------------------------------------------------------------------------------------------------------------------------------|--------------------------------------------------------------------------------------------------|
| B1     | Not (or perhaps not) interested in being the orthopedic surgeon in an ortho-bariatric centre (*)                                                                                   | Perception of own role potentially impeding prescription or follow-up of LIs (2)                 |
| F1     | There was a BMI threshold above which they would not perform a TKA at all (*)                                                                                                      | Perception of own role potentially stimulating prescription or follow-up of LIs (2)              |
| F2     | There was a BMI threshold above which they would not perform a TKA until the patient had attended a weight management program (*)                                                  | Perception of own role potentially stimulating prescription or follow-up of LIs (2)              |
| F3     | Weight loss should be the first-line treatment in the management of obese patients with symptomatic knee OA (*)                                                                    | Positive attitude toward LIs (2)                                                                 |
| F4     | Obese patients with symptomatic knee OA should be referred to a specialist weight management service before orthopaedic assessment (*)                                             | Positive attitude toward LIs (2)                                                                 |
| F5     | Obese patients with symptomatic knee OA should be assessed by a specialist multidisciplinary service, which should include an orthopaedic surgeon (*)                              | Good interdisciplinary collaboration or healthcare provision, or suggestions for improvement (4) |
| F6     | Support for creation of regional centres where orthopedic surgeons and bariatric surgeons, with their respective teams, could assess obese patients with symptomatic knee pain (*) | Good interdisciplinary collaboration or healthcare provision, or suggestions for improvement (4) |

1  
2  
3  
4  
5  
6  
7  
8  
9  
10  
11  
12  
13  
14  
15  
16  
17  
18  
19  
20  
21  
22  
23  
24  
25  
26  
27  
28  
29  
30  
31  
32  
33  
34  
35  
36  
37  
38  
39  
40  
41  
42  
43  
44  
45  
46

Hill (2018) [55]

| Number | Description                                                                                                                                                                         | Subcategory (domain)                                                                             |
|--------|-------------------------------------------------------------------------------------------------------------------------------------------------------------------------------------|--------------------------------------------------------------------------------------------------|
| B1     | I don't have/might not have the required knowledge and training around obesity care (*)                                                                                             | Lack of knowledge or skills around LIs or promoting behavioral change (2)                        |
| B2     | Weight management services are not/might not be adequately commissioned in my area (*)                                                                                              | LIs are unavailable or inaccessible (1)                                                          |
| F1     | Weight loss should be the first-line treatment in the management of symptomatic knee OA in obesity (*)                                                                              | Positive attitude toward LIs (2)                                                                 |
| F2     | Community interventions are effective at achieving sufficient and sustained weight loss (*)                                                                                         | LIs have positive effects on general health (1)                                                  |
| F3     | Obese patients with symptomatic knee OA should be referred to a specialist weight management service before orthopaedic assessment (*)                                              | Good interdisciplinary collaboration or healthcare provision, or suggestions for improvement (4) |
| F4     | Obese patients with symptomatic knee OA should be assessed by a specialist multidisciplinary service (*)                                                                            | Good interdisciplinary collaboration or healthcare provision, or suggestions for improvement (4) |
| F5     | Support for creation of regional centres where orthopaedic surgeons and bariatric surgeons, with their respective teams, could assess obese patients with symptomatic knee pain (*) | Positive attitude toward LIs (2)                                                                 |
| F6     | Intention to refer patients to an ortho-bariatric centre if it existed (*)                                                                                                          | Perception of own role potentially stimulating prescription or follow-up of LIs (2)              |

Hofstede (2016) [56]

| Number | Description                                                                         | Subcategory (domain)                                                                             |
|--------|-------------------------------------------------------------------------------------|--------------------------------------------------------------------------------------------------|
| F1     | Clear referral criteria/guideline (*)                                               | Availability of information resources (5)                                                        |
| F2     | Important to follow guidelines (*)                                                  | Positive attitude toward guidelines or protocols (2)                                             |
| F3     | Important to try non-surgical treatments first (*)                                  | Positive attitude toward LIs (2)                                                                 |
| F4     | Only few drawbacks for the use of non-surgical treatments (*)                       | LIs are safe (1)                                                                                 |
| F5     | Patients benefit from weight loss (*)                                               | LIs have positive effects on general health (1)                                                  |
| F6     | Non-surgical treatments motivate patients to do things themselves (*)               | LIs have positive mental effects (1)                                                             |
| F7     | Good results of physical therapy (*)                                                | LIs have positive effects (not further specified) (1)                                            |
| F8     | Important to delay a surgery as long as possible (*)                                | Positive attitude toward LIs (2)                                                                 |
| F9     | Agreements with colleagues about the content of the care trajectory (*)             | Good interdisciplinary collaboration or healthcare provision, or suggestions for improvement (4) |
| F10    | Peer review/audit of professional association (*)                                   | Audit (6)                                                                                        |
| F11    | Positive attitudes of colleagues about non-surgical treatments (*)                  | Good interdisciplinary collaboration or healthcare provision, or suggestions for improvement (4) |
| F12    | Clarity on what the patient has done at the physical therapist (*)                  | Improving communication between HCPs (4)                                                         |
| F13    | Agreements/ deliberations with primary care (GP, physical therapist, dietician) (*) | Good interdisciplinary collaboration or healthcare provision, or suggestions for improvement (4) |

|     |                                             |                                                                     |
|-----|---------------------------------------------|---------------------------------------------------------------------|
| F14 | Availability of non-surgical treatments (*) | LIs are available or accessible, or suggestions for improvement (1) |
|-----|---------------------------------------------|---------------------------------------------------------------------|

Lawford (2018) [57]

| Number | Description                                                                                                                                                | Subcategory (domain)                                                       |
|--------|------------------------------------------------------------------------------------------------------------------------------------------------------------|----------------------------------------------------------------------------|
| B1     | Using the telephone to consult with an OA patient and prescribe an exercise program would not/might not be easy for me (*)                                 | Other challenges for HCPs regarding feasibility of telehealth (1)          |
| B2     | I would not/might not be as satisfied talking to an OA patient over the telephone as I would be talking to the patient in person in my consulting room (*) | Other challenges for HCPs regarding feasibility of telehealth (1)          |
| B3     | An exercise program prescribed by a PT over the telephone would not/might not improve a patient's OA (*)                                                   | Disadvantages of telehealth in terms of effectiveness (1)                  |
| B4     | I would not/might not be able to adequately monitor a patient's OA over the telephone (*)                                                                  | Challenges for HCPs regarding lack of physical/visual contact (1)          |
| B5     | I do not/might not like that there would be no physical contact with an OA patient when consulting over the telephone (*)                                  | Challenges for HCPs regarding lack of physical/visual contact (1)          |
| B6     | I do not/might not like that there would be no physical contact with an OA patient when consulting over the internet video (*)                             | Challenges for HCPs regarding lack of physical/visual contact (1)          |
| B7     | I would not/might not be interested in being involved in a service offering PT-prescribed exercise over the telephone for my people with OA (*)            | Other challenges for HCPs regarding feasibility of telehealth (1)          |
| B8     | Using the telephone would not/might not be an acceptable way for me to deliver an exercise program to patients with OA (*)                                 | Other challenges for HCPs regarding feasibility of telehealth (1)          |
| B9     | Using the telephone would not/might not be a useful (practical) way for me to deliver an exercise program to patients with OA (*)                          | Other challenges for HCPs regarding feasibility of telehealth (1)          |
| B10    | Using the telephone would not/might not be an effective way for me to deliver an exercise program to patients with OA (*)                                  | Other challenges for HCPs regarding feasibility of telehealth (1)          |
| B11    | Using the telephone would not/might not be a safe way for patients to receive a PT-prescribed exercise program for their OA (*)                            | Telehealth is not safe for patients or patient/data privacy (1)            |
| F1     | Exercise is beneficial for OA (*)                                                                                                                          | LIs have positive effects on affected joint(s) (1)                         |
| F2     | I would get a good understanding of a patient's OA over the telephone (*)                                                                                  | Lack of physical/visual contact not a major issue for HCPs (1)             |
| F3     | I would get a good understanding of a patient's OA over the internet video (*)                                                                             | Lack of physical/visual contact not a major issue for HCPs (1)             |
| F4     | A patient's privacy would not be violated if I prescribed them an exercise program over the telephone (*)                                                  | Telehealth is safe for patients or patient/data privacy (1)                |
| F5     | A patient's privacy would not be violated if I prescribed them an exercise program over the internet video (*)                                             | Telehealth is safe for patients or patient/data privacy (1)                |
| F6     | Using the internet video to consult with an OA patient and prescribe an exercise program would be easy for me (*)                                          | Positive attitude or needs of HCPs regarding feasibility of telehealth (1) |

1  
2  
3  
4  
5  
6  
7  
8  
9  
10  
11  
12  
13  
14  
15  
16  
17  
18  
19  
20  
21  
22  
23  
24  
25  
26  
27  
28  
29  
30  
31  
32  
33  
34  
35  
36  
37  
38  
39  
40  
41  
42  
43  
44  
45  
46

|     |                                                                                                                                                   |                                                                            |
|-----|---------------------------------------------------------------------------------------------------------------------------------------------------|----------------------------------------------------------------------------|
| F7  | I would be as satisfied talking to an OA patient over the internet video as I would be talking to the patient in person in my consulting room (*) | Positive attitude or needs of HCPs regarding feasibility of telehealth (1) |
| F8  | An exercise program prescribed by a PT over the internet video would improve a patient's OA (*)                                                   | Benefits of telehealth in terms of effectiveness (1)                       |
| F9  | An exercise program prescribed by a PT over the telephone would save a patient money (*)                                                          | Patient-related benefits regarding feasibility of telehealth (1)           |
| F10 | An exercise program prescribed by a PT over the internet video would save a patient money (*)                                                     | Patient-related benefits regarding feasibility of telehealth (1)           |
| F11 | I would be able to adequately monitor a patient's OA over the internet video (*)                                                                  | Lack of physical/visual contact not a major issue for HCPs (1)             |
| F12 | Receiving an exercise program from a PT over the telephone would be a convenient form of health care for an OA patient (*)                        | Patient-related benefits regarding feasibility of telehealth (1)           |
| F13 | Receiving an exercise program from a PT over the internet video would be a convenient form of health care for an OA patient (*)                   | Patient-related benefits regarding feasibility of telehealth (1)           |
| F14 | Receiving an exercise program from a PT over the telephone would save the patient time (*)                                                        | Patient-related benefits regarding feasibility of telehealth (1)           |
| F15 | Receiving an exercise program from a PT over the internet video would save the patient time (*)                                                   | Patient-related benefits regarding feasibility of telehealth (1)           |
| F16 | I would be interested in being involved in a service offering PT-prescribed exercise over the internet video for my people with OA (*)            | Positive attitude or needs of HCPs regarding feasibility of telehealth (1) |
| F17 | Using the internet video would be an acceptable way for me to deliver an exercise program to patients with OA (*)                                 | Positive attitude or needs of HCPs regarding feasibility of telehealth (1) |
| F18 | Using the internet video would be a useful (practical) way for me to deliver an exercise program to patients with OA (*)                          | Positive attitude or needs of HCPs regarding feasibility of telehealth (1) |
| F19 | Using the internet video would be an effective way for me to deliver an exercise program to patients with OA (*)                                  | Positive attitude or needs of HCPs regarding feasibility of telehealth (1) |
| F20 | Using the telephone would be an affordable way for patients to receive a PT-prescribed exercise program for their OA (*)                          | Patient-related benefits regarding feasibility of telehealth (1)           |
| F21 | Using the internet video would be an affordable way for patients to receive a PT-prescribed exercise program for their OA (*)                     | Patient-related benefits regarding feasibility of telehealth (1)           |
| F22 | Using the internet video would be a safe way for patients to receive a PT-prescribed exercise program for their OA (*)                            | Telehealth is safe for patients or patient/data privacy (1)                |

Reid (2014) [58]

| Number | Description                                                                                   | Subcategory (domain)                    |
|--------|-----------------------------------------------------------------------------------------------|-----------------------------------------|
| B1     | Lack of availability of physiotherapy                                                         | LIs are unavailable or inaccessible (1) |
| B2     | Poor rate of previous (physiotherapy) success (*)                                             | Other patient characteristics (3)       |
| B3     | There is a paucity of evidence in regards to the effectiveness of physiotherapy treatment for | LIs have little or no effect on OA (1)  |

|    |                                                                                                                                      |                                                                                                  |
|----|--------------------------------------------------------------------------------------------------------------------------------------|--------------------------------------------------------------------------------------------------|
|    | OA hip and/or knee (*)                                                                                                               |                                                                                                  |
| B4 | Past experience has shown physiotherapy to be ineffective (*)                                                                        | LIs have little or no effect on OA (1)                                                           |
| F1 | Referring patients to physiotherapy if they had high levels of pain/disability and where radiographic evidence of OA was present (*) | Severity of disease and symptoms (3)                                                             |
| F2 | Referring patients to physiotherapy if they were of a younger age (*)                                                                | Other patient characteristics (3)                                                                |
| F3 | Good access to physiotherapy in area (*)                                                                                             | LIs are available or accessible, or suggestions for improvement (1)                              |
| F4 | Physiotherapists do not/might not lack expertise in OA management (*)                                                                | Good interdisciplinary collaboration or healthcare provision, or suggestions for improvement (4) |
| F5 | Conservative treatment is (perhaps) an important part of OA management (*)                                                           | Positive attitude toward LIs (2)                                                                 |

### De Rooij (2020) [59]

| Number | Description                                                                                                                                               | Subcategory (domain)                                                      |
|--------|-----------------------------------------------------------------------------------------------------------------------------------------------------------|---------------------------------------------------------------------------|
| B1     | In my daily clinical practice I can (perhaps) not integrate working according to the protocol well (*)                                                    | LIs are not feasible or sustainable (1)                                   |
| B2     | The lay out of the protocol does not/might not facilitate its usage in daily practice (*)                                                                 | Challenges for HCPs during delivery of LIs (1)                            |
| B3     | I do not/might not treat enough patients with knee OA and comorbidity to apply the protocol (*)                                                           | LIs are not feasible or sustainable (1)                                   |
| B4     | The protocol does not/might not fit well with my working methods of daily clinical practice (*)                                                           | LIs are not feasible or sustainable (1)                                   |
| B5     | I do not/might not have sufficient knowledge about knee OA exercise therapy and comorbidity to apply the protocol in daily clinical practice (*)          | Lack of knowledge or skills around LIs or promoting behavioral change (2) |
| B6     | I do not/might not have sufficient skills to apply the protocol in daily clinical practice (*)                                                            | Lack of knowledge or skills around specific resources (2)                 |
| B7     | I do not/might not read the protocol sufficiently to remember any of its contents (*)                                                                     | Lack of knowledge or skills around specific resources (2)                 |
| B8     | The number of treatments that the patient receives from their insurance company is a barrier in using the protocol (*)                                    | Restrictions due to health insurance (7)                                  |
| B9     | The patients are not/might not be cooperative in applying the protocol in daily clinical practice (*)                                                     | Negative attitude toward LIs (3)                                          |
| B10    | My colleagues in physiotherapy are not/might not be cooperative in applying the protocol in daily clinical practice (*)                                   | Non-optimal interdisciplinary collaboration or healthcare provision (4)   |
| B11    | The management of my practice is not/might not be collaborative regarding the application of the protocol in daily clinical practice (*)                  | Management not supportive (6)                                             |
| B12    | The general practitioners or other physicians are not/might not be collaborative regarding the application of the protocol in daily clinical practice (*) | Non-optimal interdisciplinary collaboration or healthcare provision (4)   |
| B13    | Suboptimal collaboration with general practitioners and physicians                                                                                        | Non-optimal interdisciplinary collaboration or healthcare provision (4)   |
| B14    | Referring physicians do not always believe in/may lack knowledge about effectiveness of exercise therapy                                                  | Non-optimal interdisciplinary collaboration or healthcare provision (4)   |
| B15    | Patients do not always believe in/may lack knowledge about effectiveness of exercise therapy                                                              | Low health literacy (3)                                                   |
| B16    | Total amount of knee OA patients with comorbidity was lower than expected                                                                                 | LIs are not feasible or sustainable (1)                                   |

|     |                                                                                                                                                       |                                                                                                  |
|-----|-------------------------------------------------------------------------------------------------------------------------------------------------------|--------------------------------------------------------------------------------------------------|
| B17 | Number of treatment sessions patients receive from insurance companies restricted application of the strategy                                         | Restrictions due to health insurance (7)                                                         |
| B18 | Patients with knee OA and comorbidity are not always motivated to perform exercises                                                                   | Negative attitude toward LIs (3)                                                                 |
| B19 | Requesting medical information about patients from specialists takes a lot of time                                                                    | Challenges of communication and referral procedures (4)                                          |
| B20 | Physicians are not always collaborating in discussing medical conditions of patients                                                                  | Lack of communication between HCPs (4)                                                           |
| F1  | The protocol is feasible in daily clinical practice (*)                                                                                               | LIs are feasible or sustainable (1)                                                              |
| F2  | The protocol supports me in clinical reasoning (*)                                                                                                    | Available resources might improve knowledge and decision-making (2)                              |
| F3  | The protocol gives the opportunity to make your own decisions regarding history taking, physical examination, and treatment (*)                       | Ability and importance of providing personalized treatment within LIs (1)                        |
| F4  | Some contents of the protocol are not/might not be incorrect (*)                                                                                      | Positive experiences with or suggestions to improve the content or structure of LIs (1)          |
| F5  | In my daily clinical practice, I work with sufficient equipment (including blood pressure meter, saturation meter) to properly apply the protocol (*) | LIs are feasible or sustainable (1)                                                              |
| F6  | The protocol is supporting the improvement of my knowledge regarding knee OA exercise therapy and comorbidity (*)                                     | Available resources might improve knowledge and decision-making (2)                              |
| F7  | The recommendations over adapting the diagnostic phase (history taking and physical examination) in the protocol are clear and understandable (*)     | Ease for HCPs during delivery of LIs (1)                                                         |
| F8  | The recommendations over adapting the OA exercise therapy in the protocol are clear and understandable (*)                                            | Ease for HCPs during delivery of LIs (1)                                                         |
| F9  | The protocol is supportive in which comorbidity-related symptoms I need to monitor before, during and after treatment (*)                             | Available resources might improve knowledge and decision-making (2)                              |
| F10 | Working with the protocol invites me to discuss more with experts in the field of the comorbidity (*)                                                 | Good interdisciplinary collaboration or healthcare provision, or suggestions for improvement (4) |
| F11 | In general, I do not/might not feel resistance towards working according to protocols (*)                                                             | Positive attitude toward guidelines or protocols (2)                                             |
| F12 | I have changed my working method (due to the protocol) (*)                                                                                            | LIs are feasible or sustainable (1)                                                              |
| F13 | Working according to the protocol is not/might not be too time-consuming (*)                                                                          | Adequate duration of specific interventions or protocols (5)                                     |
| F14 | Working according to the protocol should be financially rewarded (*)                                                                                  | Financial reward for implementing LIs (5)                                                        |
| F15 | The protocol is applicable to OA patients with comorbidity that I see in my clinical practice (*)                                                     | Positive experiences with or suggestions to improve the content or structure of LIs (1)          |
| F16 | Intake procedure is feasible and implementable                                                                                                        | LIs are feasible or sustainable (1)                                                              |
| F17 | Important to extend the intake phase to at least to 45 min                                                                                            | Positive experiences with or suggestions to improve the content or structure of LIs (1)          |
| F18 | The more you apply the strategy in daily practice, the easier it is to integrate it in your daily working method                                      | LIs are feasible or sustainable (1)                                                              |
| F19 | More insight into exercise tolerance/more background knowledge to make clinical decision by using strategy                                            | Available resources might improve knowledge and decision-making (2)                              |
| F20 | Inform referrers better about benefits of exercise therapy in patients with knee OA and                                                               | Good interdisciplinary collaboration or healthcare provision, or                                 |

|     |                                                                                                            |                                                                                                  |
|-----|------------------------------------------------------------------------------------------------------------|--------------------------------------------------------------------------------------------------|
|     | comorbidity                                                                                                | suggestions for improvement (4)                                                                  |
| F21 | Inform patients with knee OA and comorbidity better about benefits of exercise therapy                     | High health literacy or importance of education (3)                                              |
| F22 | Optimize collaboration with orthopaedic surgeons and other health care providers                           | Good interdisciplinary collaboration or healthcare provision, or suggestions for improvement (4) |
| F23 | In complex patients insurance companies should reimburse more treatment sessions                           | Benefits of good health insurance (7)                                                            |
| F24 | Useful to plan follow up/refreshment training to repeat/discuss content of course/protocol and application | Ease for HCPs during delivery of LIs (1)                                                         |
| F25 | Shortening the protocol would increase user-friendliness                                                   | Ease for HCPs during delivery of LIs (1)                                                         |

### Holden (2009) [60]

| Number | Description                                                                                                      | Subcategory (domain)                                                             |
|--------|------------------------------------------------------------------------------------------------------------------|----------------------------------------------------------------------------------|
| B1     | Biomedical perspective on knee OA, attributing signs and symptoms to local knee pathology or wear and tear       | OA seen as untreatable and local condition (wear-and-tear) (9)                   |
| B2     | OA seen as chronic degenerative condition that would progressively worsen over time (only cure being surgery)    | OA seen as untreatable and local condition (wear-and-tear) (9)                   |
| B3     | Effectiveness related to severity of joint damage/pain level (less effective when more damage/pain)              | Severity of disease and symptoms (3)                                             |
| B4     | Fear of increasing symptoms (as barrier to prescribing exercise)                                                 | LIs are unsafe or have negative effects (1)                                      |
| B5     | Causing disease progression, particularly through weight-bearing activities (as barrier to prescribing exercise) | LIs are unsafe or have negative effects (1)                                      |
| B6     | Exacerbating patient's comorbidities (as barrier to prescribing exercise)                                        | LIs are unsafe or have negative effects (1)                                      |
| B7     | Reluctant to promote exercise in the presence of pain                                                            | Severity of disease and symptoms (3)                                             |
| B8     | Negative perceptions of patients' levels of exercise adherence                                                   | Low patient adherence or engagement (3)                                          |
| B9     | Lack of motivation or laziness (as patient-centered barrier to adherence)                                        | Negative attitude toward LIs (3)                                                 |
| B10    | Human nature (as patient-centered barrier to adherence)                                                          | Potential effects of LIs are difficult to accomplish (1)                         |
| B11    | Pain (as patient-centered barrier to adherence)                                                                  | Severity of disease and symptoms (3)                                             |
| B12    | Fear of harm (as patient-centered barrier to adherence)                                                          | Low health literacy (3)                                                          |
| B13    | Negative treatment expectations (as patient-centered barrier to adherence)                                       | Negative attitude toward LIs (3)                                                 |
| B14    | Therapist's role seen as assessment/exercise prescription/education (relatively short-term responsibilities)     | Perception of own role potentially impeding prescription or follow-up of LIs (2) |
| B15    | Patient's role to follow prescribed exercise program over long term/get on board with treatment                  | Perception of own role potentially impeding prescription or follow-up of LIs (2) |
| B16    | Limited time to review individual patients reduced opportunities to facilitate behavior change                   | Lack of time within patient consultations (5)                                    |
| B17    | Large caseloads and pressure of waiting lists reduced the number of treatment sessions provided                  | Lack of time within patient consultations (5)                                    |
| B18    | Limited opportunity to provide follow-up sessions after discharge                                                | Lack of time within patient consultations (5)                                    |
| B19    | Poor links to community facilities such as local leisure centres                                                 | LIs are unavailable or inaccessible (1)                                          |



|     |                                                                                                                                          |                                                                                     |
|-----|------------------------------------------------------------------------------------------------------------------------------------------|-------------------------------------------------------------------------------------|
| B20 | Gaps in knowledge/skills (including how to facilitate behavior change, particularly with less motivated patients)                        | Lack of knowledge or skills around LIs or promoting behavioral change (2)           |
| B21 | Exercises are not/might not be effective for patients if an X-ray shows severe knee osteoarthritis (*)                                   | Severity of disease and symptoms (3)                                                |
| B22 | Increasing overall activity levels does not/might not stop the knee problem getting worse (*)                                            | LIs have little or no effect on OA (1)                                              |
| B23 | Increasing the strength of the muscles around the knee does not/might not stop the knee problem getting worse (*)                        | LIs have little or no effect on OA (1)                                              |
| B24 | General exercise is not/might not be safe for everybody to do (*)                                                                        | LIs are unsafe or have negative effects (1)                                         |
| B25 | Local strengthening exercises for the knee are not/might not be safe for everybody to do (*)                                             | LIs are unsafe or have negative effects (1)                                         |
| B26 | Knee problems are not/might not be improved by general exercise (*)                                                                      | LIs have little or no effect on OA (1)                                              |
| B27 | Physical therapists should (perhaps) not prescribe general exercise for every patient with knee OA (*)                                   | Perception of own role potentially impeding prescription or follow-up of LIs (2)    |
| B28 | It is the patient's own responsibility to continue doing their exercise program (*)                                                      | Perception of own role potentially impeding prescription or follow-up of LIs (2)    |
| B29 | It is not/might not be the physiotherapist's responsibility to make sure that the patient will continue doing their exercise program (*) | Perception of own role potentially impeding prescription or follow-up of LIs (2)    |
| B30 | It is not/might not be important that people with knee OA increase their overall activity levels (*)                                     | Negative attitude toward LIs (2)                                                    |
| F1  | Effectiveness related to severity of joint damage/pain level (more effective when less damage/pain)                                      | Severity of disease and symptoms (3)                                                |
| F2  | Importance of exercise adherence/link between level of adherence and clinical outcomes (dose-response effect)                            | Importance of high patient adherence or engagement for effectiveness of LIs (3)     |
| F3  | Recognizing potential influence on exercise adherence, sharing responsibility of exercise adherence with patient                         | Perception of own role potentially stimulating prescription or follow-up of LIs (2) |
| F4  | Exercises are effective for patients if an X-ray shows moderate knee osteoarthritis (*)                                                  | Severity of disease and symptoms (3)                                                |
| F5  | Exercises are effective for patients if an X-ray shows mild knee osteoarthritis (*)                                                      | Severity of disease and symptoms (3)                                                |
| F6  | Knee problems are improved by local strengthening exercises (*)                                                                          | LIs have positive effects on affected joint(s) (1)                                  |
| F7  | Physical therapists should prescribe local strengthening exercise for every patient with knee OA (*)                                     | Perception of own role potentially stimulating prescription or follow-up of LIs (2) |
| F8  | How well a patient complies with their exercise program determines how effective it will be (*)                                          | Importance of high patient adherence or engagement for effectiveness of LIs (3)     |
| F9  | Physiotherapists should educate chronic patients with knee OA about how to change their lifestyle for the better (*)                     | Perception of own role potentially stimulating prescription or follow-up of LIs (2) |
| F10 | A standard set of exercises is not/might not be sufficient for every patient with knee OA (*)                                            | Ability and importance of providing personalized treatment within LIs (1)           |
| F11 | Exercise for knee OA is most beneficial when it is tailored to meet individual patient needs (*)                                         | Ability and importance of providing personalized treatment within LIs (1)           |
| U1  | Exercise does not/might not work just as well for everybody, regardless of the amount of pain they have (*)                              | Severity of disease and symptoms (3)                                                |

Kloek (2020) [61]

| Number | Description                                                                                                      | Subcategory (domain)                                                                    |
|--------|------------------------------------------------------------------------------------------------------------------|-----------------------------------------------------------------------------------------|
| B1     | Less satisfied about the applicability of e-Exercise for only one diagnosis                                      | Insufficient ability to provide personalized treatment within LIs (1)                   |
| B2     | Less satisfied about time needed to get used to e-Exercise during high work pressure/administrative burden       | Lack of time due to other demands (or not further specified) (5)                        |
| B3     | Lack of technology affinity (reason for patients' non-willingness to participate in e-Exercise)                  | Patient-related challenges regarding feasibility of telehealth (1)                      |
| B4     | Patients preferred regular face-to-face contact                                                                  | Patient-related challenges regarding feasibility of telehealth (1)                      |
| B5     | Perceiving web-based application as an additional burden                                                         | Lack of time due to other demands (or not further specified) (5)                        |
| B6     | Technical skills (lack of)                                                                                       | Other challenges for HCPs regarding feasibility of telehealth (1)                       |
| B7     | Clarity of instruction manual and course (lack of)                                                               | Challenges for HCPs during delivery of LIs (1)                                          |
| B8     | Adaptive capacity to change treatment routines (lack of)                                                         | Other challenges for HCPs regarding feasibility of telehealth (1)                       |
| B9     | Busy work schedules and administrative burden hindered testing/using e-Exercise in their practice                | Lack of time due to other demands (or not further specified) (5)                        |
| B10    | Reduced face-to-face contact interfered with professional autonomy                                               | Challenges for HCPs regarding lack of physical/visual contact (1)                       |
| B11    | Absence of national e-Health guideline or standard                                                               | Other challenges for HCPs regarding feasibility of telehealth (1)                       |
| B12    | Loss of income due to substitution of face-to-face session                                                       | Other challenges for HCPs regarding feasibility of telehealth (1)                       |
| B13    | E-Exercise does not/might not contain all essential elements for the treatment of hip/knee OA (*)                | Non-optimal content or structure of LIs (1)                                             |
| B14    | I do not/might not have enough influence on the content of patients' individual e-Exercise program (*)           | Insufficient ability to provide personalized treatment within LIs (1)                   |
| B15    | The content of e-Exercise is not/might not be aligned with my opinion about treating patients with OA (*)        | Non-optimal content or structure of LIs (1)                                             |
| B16    | The intervention provided through e-Exercise is not/might not be appropriate for the average patient with OA (*) | Non-optimal content or structure of LIs (1)                                             |
| B17    | I do not/might not experience that e-Exercise supports patients in doing their exercises at home (*)             | Disadvantages of telehealth in terms of effectiveness (1)                               |
| B18    | Patients who were treated with e-Exercise were (perhaps) not generally positive about the intervention (*)       | Non-optimal content or structure of LIs (1)                                             |
| F1     | More flexibility in web-based application (intervention duration, number of sets/repetitions, type of exercises) | Ability and importance of providing personalized treatment within LIs (1)               |
| F2     | Completeness of web-based application (exercises/assignments/information)                                        | Positive experiences with or suggestions to improve the content or structure of LIs (1) |
| F3     | Perception that e-Exercise is an appropriate treatment option for subgroup of OA patients                        | Positive experiences with or suggestions to improve the content or structure of LIs (1) |
| F4     | Added value in terms of exercise adherence (important factor to use web-based                                    | Benefits of telehealth in terms of effectiveness (1)                                    |

|     |                                                                                                                        |                                                                                                  |
|-----|------------------------------------------------------------------------------------------------------------------------|--------------------------------------------------------------------------------------------------|
|     | application)                                                                                                           |                                                                                                  |
| F5  | Perceiving web-based application as time-saving                                                                        | Adequate duration of specific interventions or protocols (5)                                     |
| F6  | More flexibility in intervention (more possibilities to personalize to individual needs)                               | Ability and importance of providing personalized treatment within LIs (1)                        |
| F7  | Support from colleagues                                                                                                | Good interdisciplinary collaboration or healthcare provision, or suggestions for improvement (4) |
| F8  | Advantage of reducing number of treatments                                                                             | Positive attitude or needs of HCPs regarding feasibility of telehealth (1)                       |
| F9  | Offering an innovative intervention attracted new patients                                                             | Positive attitude or needs of HCPs regarding feasibility of telehealth (1)                       |
| F10 | The instruction course and manual assisted me so that I knew how to work with e-Exercise (*)                           | Ease for HCPs during delivery of LIs (1)                                                         |
| F11 | That it results in less income is not/might not be a major disadvantage of e-Exercise (*)                              | Positive attitude or needs of HCPs regarding feasibility of telehealth (1)                       |
| F12 | Our physiotherapy practice has the intention to use e-Health innovations (*)                                           | Positive attitude or needs of HCPs regarding feasibility of telehealth (1)                       |
| F13 | I do not/might not have insufficient time available to get familiar with e-Exercise and to use the web-application (*) | Adequate duration of specific interventions or protocols (5)                                     |
| F14 | I believe that patient data gathered at the e-Exercise web-application is stored safely (*)                            | Telehealth is safe for patients or patient/data privacy (1)                                      |

## Preferred Reporting Items for Systematic reviews and Meta-Analyses extension for Scoping Reviews (PRISMA-ScR) Checklist

| SECTION                                               | ITEM | PRISMA-ScR CHECKLIST ITEM                                                                                                                                                                                                                                                                                  | REPORTED ON PAGE #  |
|-------------------------------------------------------|------|------------------------------------------------------------------------------------------------------------------------------------------------------------------------------------------------------------------------------------------------------------------------------------------------------------|---------------------|
| <b>TITLE</b>                                          |      |                                                                                                                                                                                                                                                                                                            |                     |
| Title                                                 | 1    | Identify the report as a scoping review.                                                                                                                                                                                                                                                                   | Page 1              |
| <b>ABSTRACT</b>                                       |      |                                                                                                                                                                                                                                                                                                            |                     |
| Structured summary                                    | 2    | Provide a structured summary that includes (as applicable): background, objectives, eligibility criteria, sources of evidence, charting methods, results, and conclusions that relate to the review questions and objectives.                                                                              | Page 2              |
| <b>INTRODUCTION</b>                                   |      |                                                                                                                                                                                                                                                                                                            |                     |
| Rationale                                             | 3    | Describe the rationale for the review in the context of what is already known. Explain why the review questions/objectives lend themselves to a scoping review approach.                                                                                                                                   | Page 4-5            |
| Objectives                                            | 4    | Provide an explicit statement of the questions and objectives being addressed with reference to their key elements (e.g., population or participants, concepts, and context) or other relevant key elements used to conceptualize the review questions and/or objectives.                                  | Page 5              |
| <b>METHODS</b>                                        |      |                                                                                                                                                                                                                                                                                                            |                     |
| Protocol and registration                             | 5    | Indicate whether a review protocol exists; state if and where it can be accessed (e.g., a Web address); and if available, provide registration information, including the registration number.                                                                                                             | Page 5              |
| Eligibility criteria                                  | 6    | Specify characteristics of the sources of evidence used as eligibility criteria (e.g., years considered, language, and publication status), and provide a rationale.                                                                                                                                       | Page 6              |
| Information sources*                                  | 7    | Describe all information sources in the search (e.g., databases with dates of coverage and contact with authors to identify additional sources), as well as the date the most recent search was executed.                                                                                                  | Page 5              |
| Search                                                | 8    | Present the full electronic search strategy for at least 1 database, including any limits used, such that it could be repeated.                                                                                                                                                                            | Supplemental File 1 |
| Selection of sources of evidence†                     | 9    | State the process for selecting sources of evidence (i.e., screening and eligibility) included in the scoping review.                                                                                                                                                                                      | Page 6-7            |
| Data charting process‡                                | 10   | Describe the methods of charting data from the included sources of evidence (e.g., calibrated forms or forms that have been tested by the team before their use, and whether data charting was done independently or in duplicate) and any processes for obtaining and confirming data from investigators. | Page 7-8            |
| Data items                                            | 11   | List and define all variables for which data were sought and any assumptions and simplifications made.                                                                                                                                                                                                     | Page 7-8            |
| Critical appraisal of individual sources of evidence§ | 12   | If done, provide a rationale for conducting a critical appraisal of included sources of evidence; describe the methods used and how this information was used in any data synthesis (if appropriate).                                                                                                      | Page 7              |
| Synthesis of results                                  | 13   | Describe the methods of handling and summarizing the data that were charted.                                                                                                                                                                                                                               | Page 8-9            |

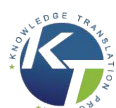

| SECTION                                       | ITEM | PRISMA-ScR CHECKLIST ITEM                                                                                                                                                                       | REPORTED ON PAGE #                                      |
|-----------------------------------------------|------|-------------------------------------------------------------------------------------------------------------------------------------------------------------------------------------------------|---------------------------------------------------------|
| <b>RESULTS</b>                                |      |                                                                                                                                                                                                 |                                                         |
| Selection of sources of evidence              | 14   | Give numbers of sources of evidence screened, assessed for eligibility, and included in the review, with reasons for exclusions at each stage, ideally using a flow diagram.                    | Figure 1<br>Page 9                                      |
| Characteristics of sources of evidence        | 15   | For each source of evidence, present characteristics for which data were charted and provide the citations.                                                                                     | Table 1<br>Page 10                                      |
| Critical appraisal within sources of evidence | 16   | If done, present data on critical appraisal of included sources of evidence (see item 12).                                                                                                      | Supplemental File 2<br>Page 10-11                       |
| Results of individual sources of evidence     | 17   | For each included source of evidence, present the relevant data that were charted that relate to the review questions and objectives.                                                           | Supplemental File 4                                     |
| Synthesis of results                          | 18   | Summarize and/or present the charting results as they relate to the review questions and objectives.                                                                                            | Table 2<br>Table 3<br>Supplemental File 3<br>Page 11-14 |
| <b>DISCUSSION</b>                             |      |                                                                                                                                                                                                 |                                                         |
| Summary of evidence                           | 19   | Summarize the main results (including an overview of concepts, themes, and types of evidence available), link to the review questions and objectives, and consider the relevance to key groups. | Page 15-17                                              |
| Limitations                                   | 20   | Discuss the limitations of the scoping review process.                                                                                                                                          | Page 18                                                 |
| Conclusions                                   | 21   | Provide a general interpretation of the results with respect to the review questions and objectives, as well as potential implications and/or next steps.                                       | Page 18-19                                              |
| <b>FUNDING</b>                                |      |                                                                                                                                                                                                 |                                                         |
| Funding                                       | 22   | Describe sources of funding for the included sources of evidence, as well as sources of funding for the scoping review. Describe the role of the funders of the scoping review.                 | Page 20                                                 |

JBI = Joanna Briggs Institute; PRISMA-ScR = Preferred Reporting Items for Systematic reviews and Meta-Analyses extension for Scoping Reviews.

\* Where *sources of evidence* (see second footnote) are compiled from, such as bibliographic databases, social media platforms, and Web sites.

† A more inclusive/heterogeneous term used to account for the different types of evidence or data sources (e.g., quantitative and/or qualitative research, expert opinion, and policy documents) that may be eligible in a scoping review as opposed to only studies. This is not to be confused with *information sources* (see first footnote).

‡ The frameworks by Arksey and O'Malley (6) and Levac and colleagues (7) and the JBI guidance (4, 5) refer to the process of data extraction in a scoping review as data charting.

§ The process of systematically examining research evidence to assess its validity, results, and relevance before using it to inform a decision. This term is used for items 12 and 19 instead of "risk of bias" (which is more applicable to systematic reviews of interventions) to include and acknowledge the various sources of evidence that may be used in a scoping review (e.g., quantitative and/or qualitative research, expert opinion, and policy document).

From: Tricco AC, Lillie E, Zarin W, O'Brien KK, Colquhoun H, Levac D, et al. PRISMA Extension for Scoping Reviews (PRISMA-ScR): Checklist and Explanation. *Ann Intern Med.* 2018;169:467–473. doi: 10.7326/M18-0850.

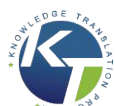

St. Michael's

Inspired Care.  
Inspiring Science.

For peer review only - <http://bmjopen.bmj.com/site/about/guidelines.xhtml>

# BMJ Open

## Barriers and facilitators perceived by healthcare professionals for implementing lifestyle interventions in patients with osteoarthritis: a scoping review

|                                 |                                                                                                                                                                                                                                                                                                                                                                                                                                                                                                                                                                                                                                                                                                                                                                                                                                                                                                     |
|---------------------------------|-----------------------------------------------------------------------------------------------------------------------------------------------------------------------------------------------------------------------------------------------------------------------------------------------------------------------------------------------------------------------------------------------------------------------------------------------------------------------------------------------------------------------------------------------------------------------------------------------------------------------------------------------------------------------------------------------------------------------------------------------------------------------------------------------------------------------------------------------------------------------------------------------------|
| Journal:                        | <i>BMJ Open</i>                                                                                                                                                                                                                                                                                                                                                                                                                                                                                                                                                                                                                                                                                                                                                                                                                                                                                     |
| Manuscript ID                   | bmjopen-2021-056831.R1                                                                                                                                                                                                                                                                                                                                                                                                                                                                                                                                                                                                                                                                                                                                                                                                                                                                              |
| Article Type:                   | Original research                                                                                                                                                                                                                                                                                                                                                                                                                                                                                                                                                                                                                                                                                                                                                                                                                                                                                   |
| Date Submitted by the Author:   | 10-Dec-2021                                                                                                                                                                                                                                                                                                                                                                                                                                                                                                                                                                                                                                                                                                                                                                                                                                                                                         |
| Complete List of Authors:       | Bouma, Sjoukje; University of Groningen, University Medical Center Groningen, Department of Orthopedics<br>van Beek, Juliette; University of Groningen, University Medical Center Groningen, Department of Orthopedics; University of Groningen, University Medical Center Groningen, Center for Human Movement Sciences<br>Diercks, Ron; University of Groningen, University Medical Center Groningen, Department of Orthopedics<br>van der Woude, Lucas; University of Groningen, University Medical Center Groningen, Center for Human Movement Sciences; University of Groningen, University Medical Center Groningen, Department of Rehabilitation Medicine<br>Stevens, Martin; University of Groningen, University Medical Center Groningen, Department of Orthopedics<br>van den Akker-Scheek, Inge; University of Groningen, University Medical Center Groningen, Department of Orthopedics |
| <b>Primary Subject Heading</b>: | Rehabilitation medicine                                                                                                                                                                                                                                                                                                                                                                                                                                                                                                                                                                                                                                                                                                                                                                                                                                                                             |
| Secondary Subject Heading:      | Sports and exercise medicine                                                                                                                                                                                                                                                                                                                                                                                                                                                                                                                                                                                                                                                                                                                                                                                                                                                                        |
| Keywords:                       | ORTHOPAEDIC & TRAUMA SURGERY, Hip < ORTHOPAEDIC & TRAUMA SURGERY, Knee < ORTHOPAEDIC & TRAUMA SURGERY, Musculoskeletal disorders < ORTHOPAEDIC & TRAUMA SURGERY, REHABILITATION MEDICINE, SPORTS MEDICINE                                                                                                                                                                                                                                                                                                                                                                                                                                                                                                                                                                                                                                                                                           |
|                                 |                                                                                                                                                                                                                                                                                                                                                                                                                                                                                                                                                                                                                                                                                                                                                                                                                                                                                                     |

SCHOLARONE™  
Manuscripts



I, the Submitting Author has the right to grant and does grant on behalf of all authors of the Work (as defined in the below author licence), an exclusive licence and/or a non-exclusive licence for contributions from authors who are: i) UK Crown employees; ii) where BMJ has agreed a CC-BY licence shall apply, and/or iii) in accordance with the terms applicable for US Federal Government officers or employees acting as part of their official duties; on a worldwide, perpetual, irrevocable, royalty-free basis to BMJ Publishing Group Ltd ("BMJ") its licensees and where the relevant Journal is co-owned by BMJ to the co-owners of the Journal, to publish the Work in this journal and any other BMJ products and to exploit all rights, as set out in our [licence](#).

The Submitting Author accepts and understands that any supply made under these terms is made by BMJ to the Submitting Author unless you are acting as an employee on behalf of your employer or a postgraduate student of an affiliated institution which is paying any applicable article publishing charge ("APC") for Open Access articles. Where the Submitting Author wishes to make the Work available on an Open Access basis (and intends to pay the relevant APC), the terms of reuse of such Open Access shall be governed by a Creative Commons licence – details of these licences and which [Creative Commons](#) licence will apply to this Work are set out in our licence referred to above.

Other than as permitted in any relevant BMJ Author's Self Archiving Policies, I confirm this Work has not been accepted for publication elsewhere, is not being considered for publication elsewhere and does not duplicate material already published. I confirm all authors consent to publication of this Work and authorise the granting of this licence.

1  
2  
3 1 **Barriers and facilitators perceived by healthcare professionals for implementing lifestyle**  
4  
5 2 **interventions in patients with osteoarthritis: a scoping review**  
6  
7  
8 3

9  
10 4 S.E. (Sjoukje) Bouma<sup>1</sup>, J.F.E. (Juliette) van Beek<sup>1,2</sup>, R.L. (Ron) Diercks<sup>1</sup>, L.H.V. (Lucas) van  
11  
12 5 der Woude<sup>2,3,4</sup>, M. (Martin) Stevens<sup>1\*</sup>, I. (Inge) van den Akker-Scheek<sup>1\*</sup>  
13  
14 6

15  
16  
17 7 <sup>1</sup> University of Groningen, University Medical Center Groningen, Department of Orthopedics,  
18  
19 8 Groningen, The Netherlands

20  
21 9 <sup>2</sup> University of Groningen, University Medical Center Groningen, Center for Human  
22  
23 10 Movement Sciences, Groningen, The Netherlands

24  
25  
26 11 <sup>3</sup> University of Groningen, University Medical Center Groningen, Department of  
27  
28 12 Rehabilitation Medicine, Groningen, The Netherlands

29  
30 13 <sup>4</sup> Peter Harrison Centre for Disability Sport, School of Sport, Exercise and Health Sciences,  
31  
32 14 Loughborough University, United Kingdom  
33  
34 15

35  
36  
37 16 \* These authors contributed equally to this work.  
38  
39  
40 17

41  
42 18 ***Corresponding author:***

43  
44 19 S.E. (Sjoukje) Bouma

45  
46 20 University of Groningen, University Medical Center Groningen

47  
48 21 Department of Orthopedics (BB51)

49  
50 22 PO Box 30.001

51  
52 23 9700 RB Groningen, The Netherlands

53  
54 24 E-mail: [s.e.bouma@umcg.nl](mailto:s.e.bouma@umcg.nl)  
55  
56  
57  
58  
59  
60



1  
2  
3 **25 Abstract**  
4

5 **26 Objective:** To provide an overview of barriers and facilitators that healthcare professionals  
6  
7  
8 **27 (HCPs) perceive regarding the implementation of lifestyle interventions (LIs) in patients with**  
9  
10 **28 hip and/or knee osteoarthritis (OA).**

11  
12 **29 Design:** Scoping review.

13  
14 **30 Data sources:** The databases PubMed, Embase, CINAHL, PsycINFO, and the Cochrane  
15  
16  
17 **31 Library were searched from inception up to January 2021.**

18  
19 **32 Eligibility criteria:** Primary research articles with a quantitative, qualitative or mixed-methods  
20  
21 **33 design were eligible for inclusion if they reported: (1) perceptions of primary and/or**  
22  
23 **34 secondary HCPs (*population*); (2) on implementing LIs with physical activity and/or weight**  
24  
25 **35 management as key components (*concept*); (3) on conservative management of hip and/or**  
26  
27 **36 knee OA (*context*). Articles not published in English, German, or Dutch were excluded.**

28  
29  
30 **37 Data extraction and synthesis:** Barriers and facilitators were extracted by two researchers  
31  
32  
33 **38 independently. Subsequently, the extracted factors were linked to a framework based on the**  
34  
35 **39 Tailored Implementation for Chronic Diseases checklist.**

36  
37 **40 Results:** Thirty-six articles were included. In total, 809 factors were extracted and subdivided  
38  
39  
40 **41 into nine domains. The extracted barriers were mostly related to non-optimal interdisciplinary**  
41  
42 **42 collaboration, patients' negative attitude toward LIs, patients' low health literacy, and HCPs'**  
43  
44 **43 lack of knowledge and skills around LIs or promoting behavioral change. The extracted**  
45  
46 **44 facilitators were mostly related to good interdisciplinary collaboration, a positive perception**  
47  
48 **45 of HCPs' own role in implementing LIs, the content or structure of LIs, and HCPs' positive**  
49  
50 **46 attitude toward LIs.**

51  
52  
53 **47 Conclusions:** Multiple individual and environmental factors influence the implementation of  
54  
55  
56 **48 LIs by HCPs in patients with hip and/or knee OA. The resulting overview of barriers and**  
57  
58 **49 facilitators can guide future research on the implementation of LIs within OA care. To**  
59  
60

1  
2  
3 50 investigate whether factor frequency is related to the relevance of each domain, further  
4  
5 51 research should assess the relative importance of the identified factors involving all relevant  
6  
7  
8 52 disciplines of primary and secondary HCPs.

9  
10 53 *PROSPERO registration number:* CRD42019129348.  
11

12 54

13  
14 55 **Abstract word count:** 300 (max. 300 words)

15  
16 56 **Manuscript word count:** 4152 (recommended:  $\leq$  4000 words)  
17  
18

19 57

20  
21 58 **Strengths and limitations of this study**

- 22  
23  
24 59
  - To our knowledge, this is the first scoping review to classify barriers and facilitators  
25  
26 60 for implementing lifestyle interventions by healthcare professionals as conservative  
27  
28 61 treatment for hip and/or knee osteoarthritis in which qualitative and quantitative data  
29  
30 62 were combined.
  - The study population consisted of all primary and secondary healthcare professionals  
31  
32 63 involved in hip and/or knee osteoarthritis care.
  - Given the broad definition of “implementing lifestyle interventions”, the identified  
33  
34 64 barriers and facilitators provide insight into the full spectrum of influencing factors  
35  
36 65 rather than being applicable to every single way of implementing lifestyle  
37  
38 66 interventions.  
39  
40 67  
41  
42 68  
43  
44 69  
45  
46  
47  
48  
49  
50  
51  
52  
53  
54  
55  
56  
57  
58  
59  
60

## 70 **Introduction**

71  
72 Regular physical activity and weight management are recommended by national and  
73 international clinical guidelines for the conservative management of hip and/or knee  
74 osteoarthritis (OA)<sup>1-5</sup>. Previous studies have demonstrated that lifestyle interventions (LIs)  
75 focusing on exercise, alone or combined with dietary weight loss, are able to reduce hip  
76 and/or knee OA-related disability and to postpone or even prevent total joint arthroplasty<sup>6-10</sup>.  
77 However, these positive results are not always transferred from research settings to daily  
78 practice, which means that LIs are underutilized<sup>11</sup>. This suboptimal implementation of LIs as  
79 treatment for hip and/or knee OA can result from factors related to the patient, the healthcare  
80 professional (HCP) or the societal context<sup>12</sup>. Research on adhering to LIs has so far focused  
81 mainly on identifying barriers and facilitators at the patient level. However, these studies have  
82 also shown that HCPs can have a facilitating role in the lifestyle behavior of their patients, for  
83 example by providing advice, education, encouragement, and instructions<sup>13,14</sup>.

84  
85 Some research has already been conducted investigating the perspective of HCPs and the  
86 implementation of LIs in their daily practice. This knowledge is needed in order to enhance  
87 the implementation of LIs. As far as the authors know, no (systematic) literature review has  
88 previously been performed that identified and/or classified barriers and facilitators for  
89 implementing LIs in the conservative treatment of hip and/or knee OA from the perspective of  
90 all HCPs involved. One systematic review focused on the views toward OA management  
91 based on recommendations in clinical practice guidelines of HCPs working in primary care<sup>15</sup>.  
92 However, HCPs working in secondary care are also involved in the treatment of patients with  
93 OA, which draws attention to the importance of collaboration and communication between  
94 primary and secondary care practitioners<sup>16</sup>. Therefore, a scoping review was conducted

1  
2  
3 95 aiming to provide a comprehensive overview of barriers and facilitators perceived by primary  
4  
5 96 and secondary HCPs regarding the implementation of LIs in patients with hip and/or knee  
6  
7 97 OA. The Tailored Implementation for Chronic Diseases (TICD) checklist was used to guide  
8  
9 98 data synthesis<sup>17</sup>. Within the context of this review, implementation was defined as the use of  
10  
11 99 LIs as conservative treatment for hip and/or knee OA by individual HCPs.  
12  
13  
14  
15 100

## 17 101 **Method**

### 21 103 *Study design*

23 104 A scoping review has been defined as follows by Colquhoun et al.: “a form of knowledge  
24  
25 105 synthesis that addresses an exploratory research question aimed at mapping key concepts,  
26  
27 106 types of evidence and gaps in research related to a defined area or field by systematically  
28  
29 107 searching, selecting, and synthesizing existing knowledge”<sup>18</sup>. Therefore, a scoping review was  
30  
31 108 considered a suitable methodology to summarize existing literature on barriers and facilitators  
32  
33 109 for implementing LIs in hip and/or knee OA and to identify potential gaps in the current  
34  
35 110 literature on participation of primary and secondary HCPs. We conducted this scoping review  
36  
37 111 according to the framework developed by Arksey and O’Malley<sup>19</sup>. Five stages were followed  
38  
39 112 successively: (1) identifying the research question; (2) identifying relevant studies; (3) study  
40  
41 113 selection; (4) charting the data; and (5) collating, summarizing and reporting the results<sup>19</sup>. The  
42  
43 114 PRISMA Extension for Scoping Reviews (PRISMA-ScR) checklist was used as reporting  
44  
45 115 guideline<sup>20</sup>. The review protocol was registered in the PROSPERO database (registration  
46  
47 116 number: CRD42019129348).  
48  
49  
50  
51  
52  
53  
54 117

### 56 118 *Data sources and searches*

1  
2  
3 119 A search strategy was developed consisting of four components: search terms related to (1)  
4  
5 120 primary and secondary HCPs; (2) hip and/or knee OA; (3) LIs; and (4) barriers and  
6  
7 121 facilitators. This search strategy was applied in five bibliographic electronic databases (i.e.  
8  
9 122 PubMed, Embase, CINAHL, PsycINFO, and the Cochrane Library) to identify relevant  
10  
11 123 articles from inception up to 19 January 2021. A detailed search strategy for each of the  
12  
13 124 databases can be found in Supplemental File 1. Reference lists of included articles were  
14  
15 125 manually searched for additional relevant articles. Primary research articles with a  
16  
17 126 quantitative, qualitative or mixed-methods design were eligible for inclusion; study protocols,  
18  
19 127 reviews, abstracts, and commentaries were excluded. Articles written in English, German, or  
20  
21 128 Dutch were eligible for inclusion. No restrictions were applied regarding publication period.  
22  
23  
24  
25  
26  
27

### 28 130 ***Study selection***

29  
30 131 Eligibility criteria were described according to the Population-Concept-Context framework<sup>21</sup>.  
31  
32 132 First, the study population was defined as all primary and secondary HCPs who are involved  
33  
34 133 in the conservative treatment of patients with hip and/or knee OA. This definition includes,  
35  
36 134 respectively, HCPs providing general medical care and HCPs providing more specialized care  
37  
38 135 (with or without a referral). Articles focusing solely on the perspective of patients with hip  
39  
40 136 and/or knee OA were excluded. Second, the concepts central to this review were barriers and  
41  
42 137 facilitators for implementing LIs. Barriers and facilitators were defined as any belief,  
43  
44 138 experience, factor, opinion, reason, or view reported by an HCP that potentially influences  
45  
46 139 (either impedes or facilitates) implementation of LIs in patients with hip and/or knee OA.  
47  
48 140 These barriers and facilitators were extracted from both quantitative (e.g. survey) and  
49  
50 141 qualitative (e.g. interview) data. Implementing LIs was broadly defined, ranging from  
51  
52 142 mentioning or discussing a healthy lifestyle to recommending or running specific lifestyle  
53  
54 143 programs, as long as it was clearly described that physical activity and/or weight management  
55  
56  
57  
58  
59  
60

1  
2  
3 144 were key components. This definition includes physiotherapeutic exercise interventions  
4  
5 145 (aerobic, functional, or strengthening programs), dietary interventions, and self-management  
6  
7 146 programs. Physiotherapeutic modalities such as acupuncture, manual therapy, and massage,  
8  
9 147 and self-management programs whose content was not specified were not considered LIs and  
10  
11 148 were therefore excluded. Physical activity was also broadly defined, ranging from physical  
12  
13 149 activity during activities of daily living to participation in supervised or non-supervised  
14  
15 150 exercise therapy or sports. Articles not primarily focusing on implementing LIs (e.g.  
16  
17 151 development and evaluation of clinical guidelines, general management of hip and/or knee  
18  
19 152 OA, general patient-practitioner relationship or shared decision-making) also fell outside the  
20  
21 153 scope of this review. Lastly, the context of this review was the conservative treatment of hip  
22  
23 154 and/or knee OA in both primary and secondary healthcare settings. Articles focusing on  
24  
25 155 preoperative or postoperative treatment of hip and/or knee OA were excluded. Two  
26  
27 156 researchers (SB together with AJ or JvB) independently assessed the eligibility of the  
28  
29 157 identified articles based on the above criteria in three consecutive rounds: based on (1) title;  
30  
31 158 (2) abstract; and (3) full-text of the article. Any disagreements among the researchers were  
32  
33 159 resolved in consensus meetings.  
34  
35  
36  
37  
38  
39  
40  
41

#### 42 161 ***Data extraction and quality assessment***

43  
44 162 A data extraction form was created and pilot-tested in order to systematically record study  
45  
46 163 characteristics (first author, year of publication, country of origin, aims/purpose, study design,  
47  
48 164 data collection method, data analysis method, theoretical basis, study population, setting,  
49  
50 165 recruitment method, type of LI, patient population) and outcomes (barriers, facilitators, and/or  
51  
52 166 unclear factors (i.e. an influencing factor, but not clearly defined as barrier or facilitator)).  
53  
54 167 Study quality was assessed with the Mixed Methods Appraisal Tool (MMAT). The MMAT is  
55  
56 168 a critical appraisal tool that can be used in reviews of mixed studies to assess the  
57  
58  
59  
60

1  
2  
3 169 methodological quality of different study design categories: mixed-methods, qualitative, and  
4  
5 170 quantitative studies (randomized controlled trials, non-randomized studies, and descriptive  
6  
7  
8 171 studies)<sup>22,23</sup>. Since calculating a total score is discouraged<sup>23</sup>, it was chosen to present the  
9  
10 172 ratings of the individual criteria.

11  
12 173

13  
14 174 Data extraction was performed in two stages. The first stage consisted of filling in the data  
15  
16  
17 175 extraction form and the MMAT for each article, done by two researchers (SB/JvB)  
18  
19 176 independently. Regarding barriers and facilitators, both researchers extracted the relevant  
20  
21 177 units of text and/or descriptive statistics from the Results sections. Any discrepancies between  
22  
23  
24 178 the researchers in this first stage were resolved in consensus meetings. During the second  
25  
26 179 stage, the extraction of barriers and facilitators was discussed among the research team  
27  
28 180 (SB/MS/IvdAS) and the process was further refined for both quantitative and qualitative data.  
29  
30 181 Regarding quantitative data, factors were only extracted if  $\geq 50\%$  of participants indicated that  
31  
32 182 the factor influenced the implementation of LIs<sup>24,25</sup>. For close-ended questions or attitude  
33  
34 183 statements with multiple answer options, participants were classified as being “in agreement”  
35  
36 184 or “not in agreement”. If this classification had not yet been made by the authors of the  
37  
38 185 original article, it was made based on the possible answer options, with “(strongly) agree”, “to  
39  
40 186 a reasonable/large extent” and “yes” indicating agreement, and “neither disagree or agree”,  
41  
42 187 “don’t know”, “neutral”, “a little bit/not at all”, “(strongly) disagree”, and “no” indicating not  
43  
44  
45  
46 188 in agreement. Next, the factor was classified as barrier or facilitator depending on the  
47  
48 189 formulation of the question and which of the two groups (“in agreement” versus “not in  
49  
50 190 agreement”) comprised  $\geq 50\%$  of the participants. In case of open-ended questions, all  
51  
52  
53 191 mentioned factors were extracted. Regarding qualitative data, if the authors of the original  
54  
55 192 study did not explicitly identify a factor as barrier or facilitator, the description in the text or  
56  
57 193 the participants’ quotes were used to classify the factor as barrier (i.e.

1  
2  
3 194 impeding/negative/problem/lack), facilitator (i.e. facilitating/positive/solution/need), or  
4  
5 195 unclear (i.e. insufficient information). In addition, all unclear factors were re-discussed with a  
6  
7 196 third researcher (IvdAS) to assess whether these factors could nevertheless be classified as  
8  
9 197 barrier or facilitator. At the end of the second stage, final data extraction based on the above  
10  
11 198 criteria was performed by one researcher (SB), who also checked the consistency of the entire  
12  
13 199 data extraction process.  
14  
15  
16

17 200

### 19 201 ***Data synthesis and analysis***

21 202 A narrative synthesis of the data was undertaken, based on the TICD checklist developed by  
22  
23 203 Flottorp et al.<sup>17</sup>. This checklist aims to assist in identifying key determinants of professional  
24  
25 204 practice, defined as factors that might prevent or enable healthcare improvements, and is  
26  
27 205 intended for use in research on implementation and quality improvement in healthcare. It  
28  
29 206 consists of seven domains: (1) guideline factors; (2) individual health professional factors; (3)  
30  
31 207 patient factors; (4) professional interactions; (5) incentives and resources; (6) capacity for  
32  
33 208 organizational change; and (7) social, political, and legal factors. The authors of the current  
34  
35 209 study have previously used the TICD checklist in the analysis of focus group data on the same  
36  
37 210 topic, revealing two additional domains: (8) patient and HCP interactions; and (9) disease  
38  
39 211 factors<sup>26</sup>. One researcher (SB) assigned all extracted factors to one of these nine domains and  
40  
41 212 then inductively developed different categories and subcategories of factors per domain. The  
42  
43 213 resulting classification of factors and corresponding conclusions were subsequently discussed  
44  
45 214 among the research team (SB/MS/IvdAS).  
46  
47  
48  
49

51 215

### 53 216 ***Patient and public involvement***

55 217 Patients or the public were not involved in this study as the study aim did not concern patients  
56  
57 218 but HCPs.  
58  
59  
60



219

## 220 **Results**

221

### 222 *Study selection*

223 A flowchart of the study selection process is presented in Figure 1. A total of 8338 articles  
224 were retrieved. After removal of duplicates and exclusion of articles based on title or abstract,  
225 93 potentially relevant articles remained for full-text screening. Ultimately, 36 articles were  
226 included in the qualitative synthesis<sup>27-62</sup>.

227

228 [Figure 1. Flowchart of the study selection process]

229

### 230 *Study characteristics*

231 General characteristics of the included studies are presented in Table 1. The majority of  
232 studies were conducted in Australia (36%), the Netherlands (19%), the United Kingdom  
233 (19%) and Canada (11%). Qualitative data were extracted in 26 studies (72%), quantitative  
234 data in 7 studies (19%), and both qualitative and quantitative data in the remaining 3 studies  
235 (8%). Individual interviews were most commonly used as qualitative data collection method,  
236 while the quantitative studies were all based on cross-sectional surveys. Most studies included  
237 physiotherapists or general practitioners (or physicians) as study population. Other  
238 participants were dieticians, exercise professionals, a nurse practitioner, an occupational  
239 therapist, orthopedic surgeons, practice nurses, program instructors, rheumatologists,  
240 telephone coaches, and triaging clinicians.

241

242 [Table 1 near here]

243

1  
2  
3 244 ***Quality assessment***  
4

5 245 Findings of the quality assessment of the included studies based on the MMAT are shown in  
6  
7 246 Supplemental File 2. Regarding the qualitative data assessments, only one study had the  
8  
9  
10 247 maximum of five positive ratings. Seven studies had a negative rating for the item on  
11  
12 248 substantiating the interpretation of results, as no or a limited number of participant quotes  
13  
14 249 were presented. In addition, many unknown ratings were given due to a lack of information  
15  
16 250 about the applied qualitative approach and/or data analysis methods and their rationale.  
17  
18 251 Regarding the quantitative data assessments, most studies had a negative or unknown rating  
19  
20 252 for the risk of non-response bias due to low response rates or a lack of information about the  
21  
22 253 response rate and/or reasons for non-response. In addition, the item on representativeness of  
23  
24 254 the sample was often given an unknown rating because insufficient information about the  
25  
26 255 sample and/or non-responders was presented. Finally, all three mixed-methods studies had a  
27  
28 256 negative rating since the qualitative and quantitative components did not adhere to their  
29  
30 257 specific quality criteria. For the other four mixed-methods criteria, only one of these three  
31  
32 258 studies obtained positive ratings.  
33  
34  
35  
36  
37  
38  
39

40 260 ***Synthesis of results***  
41

42 261 A total of 809 factors were extracted from the 36 included articles. Table 2 presents the  
43  
44 262 distribution of factors from the individual studies across the aforementioned nine domains,  
45  
46 263 which were largely based on the TICD checklist. The highest number of factors was assigned  
47  
48 264 to intervention factors (n=315), followed by individual HCP factors (n=144), and patient  
49  
50 265 factors (n=137). The lowest number of factors was assigned to capacity for organizational  
51  
52 266 change (n=7), followed by social, political, and legal factors (n=9), and patient and HCP  
53  
54 267 interactions (n=19). In Table 3 the content of the nine domains is further explained by  
55  
56 268 presenting an overview of the created categories and subcategories of factors that potentially  
57  
58  
59  
60

1  
2  
3 269 influence the implementation of LIs by HCPs within each domain. A full overview of all  
4  
5 270 extracted factors can be found in Supplemental File 3 (presented per domain) and  
6  
7  
8 271 Supplemental File 4 (presented per article).  
9

10 272

11  
12 273 [Table 2 near here]

13  
14 274 [Table 3 near here]

15  
16 275

### 17 18 19 276 *Categories*

20  
21 277 The distribution of barriers and facilitators across the various categories is presented in Figure  
22  
23  
24 278 2. The highest number of barriers was assigned to the following five categories: telehealth  
25  
26 279 (n=40), collaboration (n=32), expertise (n=32), accessibility (n=32) and treatment  
27  
28 280 expectations and preferences (n=31). The highest number of facilitators was assigned to the  
29  
30 281 following five categories: telehealth (n=60), collaboration (n=46), design (n=45),  
31  
32 282 effectiveness (n=41) and role (n=28).  
33  
34

35 283

36  
37 284 [Figure 2. Overview of the number of barriers and facilitators per category]

38  
39  
40 285 Figure caption – The domain numbers indicated in brackets refer to the domains as presented  
41  
42 286 in Table 3: (1) intervention factors; (2) individual HCP factors; (3) patient factors; (4)  
43  
44 287 professional interactions; (5) incentives and resources; (6) capacity for organizational change;  
45  
46 288 (7) social, political, and legal factors; (8) patient and HCP interactions; (9) disease factors.  
47  
48 289 Unclear factors were not included in this figure due to the low number (n=11).  
49

50  
51 290

### 52 53 291 *Subcategories*

54  
55  
56  
57  
58  
59  
60

1  
2  
3 292 Table 4 and Table 5 present the rankings of the ten largest subcategories of barriers and  
4  
5 293 facilitators respectively. The first place in both rankings was assigned to a subcategory related  
6  
7 294 to interdisciplinary collaboration or healthcare provision.  
8  
9

10 295

11  
12 296 [Table 4 near here]

13  
14 297 [Table 5 near here]

15  
16 298

## 17 299 **Discussion**

20 300

21  
22 301 The aim of this review was to provide an overview of barriers and facilitators that primary  
23  
24 302 and secondary HCPs perceive for implementing LIs in patients with hip and/or knee OA. By  
25  
26 303 linking the identified factors to a framework that was largely based on the TICD checklist<sup>17</sup>, a  
27  
28 304 comprehensive overview of influencing factors was created that could serve as a basis for  
29  
30 305 improving the implementation of LIs within primary and secondary OA care. The variety of  
31  
32 306 domains shows that multiple levels (i.e. both the level of the individual HCP and several  
33  
34 307 environmental levels) should be considered in order to achieve this. Within this framework,  
35  
36 308 the extracted barriers were most frequently related to non-optimal interdisciplinary  
37  
38 309 collaboration, a negative attitude of patients toward LIs, low health literacy of patients, and a  
39  
40 310 lack of knowledge and skills of HCPs around LIs or promoting behavioral change. The  
41  
42 311 extracted facilitators were most frequently related to good interdisciplinary collaboration, a  
43  
44 312 positive perception of HCPs' own role in implementing LIs, the content or structure of LIs,  
45  
46 313 and a positive attitude of HCPs toward LIs.  
47  
48  
49  
50  
51  
52  
53  
54

55 314

56 315 A relatively large number of studies were included, a majority of which was published in  
57  
58 316 recent years. From these 36 studies, a total of 809 influencing factors were extracted.  
59  
60

1  
2  
3 317 Although all nine domains were covered, the total number of factors identified within each  
4  
5 318 domain differed greatly, ranging from 7 (*capacity for organizational change*) to 315  
6  
7 319 (*intervention factors*). In addition, a large variation was found in the number of barriers and  
8  
9 320 facilitators between the various categories and subcategories. However, we do not know yet  
10  
11 321 whether the established factor frequency is directly related to the importance of the domain,  
12  
13 322 category or subcategory in question. So the fact that we found the highest number of factors  
14  
15 323 within certain domains, categories or subcategories does not necessarily mean that these are  
16  
17 324 the most important or relevant in the context of implementation. It could also be an indication  
18  
19 325 that studies to date have mainly focused on these aspects, and that the others are still  
20  
21 326 underexposed in the available literature. Therefore, we recommend to take all domains into  
22  
23 327 account in future research in order to avoid missing factors that might be highly relevant for  
24  
25 328 the implementation of LIs. The quality assessment of the included studies showed many  
26  
27 329 unknown ratings due to a lack of information about, for example, the applied methods and  
28  
29 330 their rationale. This finding does not have to mean that the studies are of low quality, but it  
30  
31 331 does emphasize the importance of accurate and complete reporting of research using design-  
32  
33 332 specific reporting guidelines.

34  
35  
36  
37  
38  
39  
40 333  
41  
42 334 Our results reflect those of a previous systematic review conducted by Egerton et al.<sup>15</sup>, in  
43  
44 335 which the authors synthesized qualitative evidence only on primary care clinicians' views on  
45  
46 336 providing recommended management of OA up to August 2016. In addition to exercise and  
47  
48 337 weight loss, recommended management included education, self-management support, and  
49  
50 338 medication. The authors identified four barriers as main themes: (1) "OA is not that serious";  
51  
52 339 (2) "clinicians are, or perceive they are, underprepared"; (3) "personal beliefs at odds with  
53  
54 340 providing recommended practice"; and (4) "dissonant patient expectations". A few system-  
55  
56 341 related factors (e.g. time, payment system) were mentioned, but these were not found to be  
57  
58  
59  
60

1  
2  
3 342 themes across multiple studies. The added value of the current review in comparison to the  
4  
5 343 review by Egerton et al. is that factors related to interdisciplinary collaboration and the  
6  
7 344 organizational and societal context were in fact identified. Although these domains were  
8  
9 345 relatively small in terms of number of factors, the current review shows that these factors can  
10  
11 346 also influence the implementation of LIs and thus offers an even broader perspective on the  
12  
13 347 implementation status of LIs within OA care. Besides an expansion of the review's scope (i.e.  
14  
15 348 the inclusion of quantitative data and the perspectives of secondary HCPs), this broader  
16  
17 349 perspective of our review most likely arises from the date of the search. The vast majority  
18  
19 350 (72%) of the included articles were in fact published in the past five years (after Egerton et al.  
20  
21 351 had conducted their review), which shows that there is growing attention for the role of  
22  
23 352 lifestyle as treatment for hip and/or knee OA. Very recently another scoping review has been  
24  
25 353 published, conducted by Nissen et al.<sup>63</sup>, which focused on clinicians' beliefs and attitudes  
26  
27 354 about physical activity and exercise therapy as treatment for hip and/or knee OA. The authors  
28  
29 355 thematically analyzed qualitative data from four types of HCPs (physiotherapists, general  
30  
31 356 practitioners, orthopedic surgeons and rheumatologists). Their main finding is that many  
32  
33 357 clinicians perceive OA to be a low priority "wear and tear" disease. In addition, they  
34  
35 358 identified a relative lack of knowledge about and interest in physical activity and exercise  
36  
37 359 management among many clinicians. These findings are also reflected in our results  
38  
39 360 (especially in the domains *disease factors* and *individual HCP factors*). In addition, even  
40  
41 361 more barriers and facilitators have been identified in the current review. Compared to this  
42  
43 362 review by Nissen et al, our review again has a broader scope (i.e. the inclusion of weight  
44  
45 363 management, quantitative data and the perspectives of more types of HCPs) and can therefore  
46  
47 364 be seen as relevant addition to the existing literature on this topic.  
48  
49  
50  
51  
52  
53  
54  
55  
56  
57  
58  
59  
60

1  
2  
3 366 In addition to summarizing the existing literature on barriers and facilitators for implementing  
4  
5 367 LIs, this review aimed to identify potential gaps in literature on the participation of HCPs.  
6  
7 368 Although we aimed to include perceptions of various primary and secondary HCPs, the  
8  
9  
10 369 results show that studies to date have mainly focused on the views of physiotherapists and  
11  
12 370 general practitioners. These primary HCPs may well be the first point of contact for patients  
13  
14 371 within the care pathway, yet we recommend that other relevant disciplines – like dieticians,  
15  
16 372 lifestyle counselors, practice nurses, and orthopedic clinicians – be more involved in follow-  
17  
18 373 up research, allowing for a more complete understanding of the patient journey in OA care.  
19  
20 374 Special attention should then be drawn to potential differences in perceived barriers and  
21  
22 375 facilitators between types of HCPs, so that implementation strategies can be tailored as much  
23  
24 376 as possible to the various types of HCPs and their clinical practice.  
25  
26  
27  
28  
29

30  
31 378 The resulting overview of barriers and facilitators can be used to improve the implementation  
32  
33 379 of LIs in daily practice. This overview presents factors that are relevant for individual HCPs,  
34  
35 380 as well as for policymakers, who can facilitate the organizational and societal context in  
36  
37 381 which primary and secondary HCPs work. When developing implementation strategies,  
38  
39 382 possible interactions between the various domains should also be considered. For instance,  
40  
41 383 more time (*domain 5*) can be used in various ways by HCPs: for their own education (*domain*  
42  
43 384 *2*), provision of information to patients (*domain 3*), or interdisciplinary consultation (*domain*  
44  
45 385 *4*). Another example is that societal changes in health insurance or payment structures  
46  
47 386 (*domain 7*) can lead to increased accessibility of LIs (*domain 1*), and that limited financial  
48  
49 387 resources might be less of an obstacle for patients (*domain 3*). Hence changes related to the  
50  
51 388 established factors can have positive effects on multiple levels.  
52  
53  
54  
55

56 389  
57  
58  
59  
60

1  
2  
3 390 Within the domain of intervention factors, a separate category was created for factors specific  
4  
5 391 to delivering LIs via telehealth. Attention for this modality of healthcare provision has been  
6  
7 392 growing for some time<sup>64</sup>. In addition, during the course of the current review the COVID-19  
8  
9 393 pandemic emerged, which meant that many HCPs actually had to use telehealth in their daily  
10  
11 394 practice<sup>65</sup>. Although telehealth was not a specific focus of this review, it could be interesting  
12  
13 395 to further investigate the experiences with telehealth and its value for long-term counseling of  
14  
15 396 patients with hip and/or knee OA on behavioral change<sup>66</sup>.

16  
17 397  
18  
19 398 To the best of our knowledge, this is the first review to focus specifically on the  
20  
21 399 implementation of LIs as conservative treatment for hip and/or knee OA while taking into  
22  
23 400 account the perceptions of all primary and secondary HCPs involved. Both qualitative and  
24  
25 401 quantitative data were included, providing broad insight into the topic. All included studies  
26  
27 402 were conducted in North America, Europe and Oceania. Given that the majority of these  
28  
29 403 studies were conducted quite recently, our results are expected to be representative of the  
30  
31 404 current situation in these continents.

32  
33 405  
34  
35 406 There are also a few limitations to acknowledge. First, “implementing LIs” was defined very  
36  
37 407 broadly and can be seen as an umbrella term, ranging from mentioning a healthy lifestyle to  
38  
39 408 running specific lifestyle programs. Due to the heterogeneity of the included studies in terms  
40  
41 409 of study design and evaluated LIs, no distinction was made between the different ways of  
42  
43 410 implementing LIs during data analysis. Consequently, the identified barriers and facilitators  
44  
45 411 may not fit with every single way of implementing LIs, but may rather provide insight into the  
46  
47 412 full spectrum of influencing factors. Although data synthesis has not been performed  
48  
49 413 separately for physical activity and weight management either, the created overview gives us  
50  
51 414 the overall impression that barriers and facilitators related to these two lifestyle components  
52  
53  
54  
55  
56  
57  
58  
59  
60



1  
2  
3 415 are quite similar. One barrier that seems to be unique to weight management is the perception  
4  
5 416 of it being a difficult or sensitive subject to discuss. Regarding physical activity, the  
6  
7 417 perception that it is unsafe or has negative effects seems to be a unique barrier. Second,  
8  
9  
10 418 although data extraction and quality assessment were performed by two researchers  
11  
12 419 independently, data analysis was performed primarily by one researcher. By discussing the  
13  
14 420 resulting classification of factors and any doubts during the process with members of the  
15  
16  
17 421 research team, we aimed to increase the reliability of our findings. Third, the chosen cut-off  
18  
19 422 percentage for extracting quantitative data was based on other scoping reviews combining the  
20  
21 423 results of quantitative and qualitative studies<sup>24,25</sup>. Therefore, there is a chance that factors that  
22  
23 424 would have been extracted when using a lower cut-off percentage are missing. However, it is  
24  
25  
26 425 also possible that these factors were already extracted from the other included studies and  
27  
28 426 therefore still included in our results. Lastly, as we did not search grey literature there is a  
29  
30 427 slight chance that relevant studies may have been missed.  
31  
32

33 428  
34  
35 429 The comprehensive overview of barriers and facilitators for implementing LIs in patients with  
36  
37 430 hip and/or knee OA by HCPs resulting from this review can serve as a basis for further  
38  
39 431 research and the development of implementation strategies that focus on both the individual  
40  
41 432 and the environmental context of HCPs. However, what the relative importance of the  
42  
43 433 identified factors is and whether differences exist between the various types of primary and  
44  
45 434 secondary HCPs with respect to these factors are not known yet. Further research is required  
46  
47 435 to provide more insight into this relative importance and therewith the most relevant targets  
48  
49 436 for change in daily practice.  
50  
51  
52

53 437

54  
55  
56 438 *Conclusion*  
57  
58  
59  
60

1  
2  
3 439 This review has shown that multiple factors influence whether or not HCPs implement LIs  
4  
5 440 when treating patients with hip and/or knee OA. Data analysis has resulted in a  
6  
7 441 comprehensive overview of influencing factors, where barriers and facilitators have been  
8  
9 442 subdivided into nine domains, both at an individual and at several environmental levels. The  
10  
11 443 review contributes to existing knowledge about the implementation of LIs by identifying  
12  
13 444 multiple factors related to the intervention, interdisciplinary collaboration, and the  
14  
15 445 organizational and societal context. The broad inventory created in this review can be a first  
16  
17 446 step toward an improved implementation of LIs by HCPs in OA care. Future research in this  
18  
19 447 area should focus on determining the relative importance of the identified factors involving all  
20  
21 448 relevant disciplines of primary and secondary HCPs.  
22  
23  
24  
25  
26  
27

#### 28 450 **Acknowledgments**

29 451 The authors would like to thank Truus van Ittersum for her advice on search strategies and  
30  
31 452 Annemarie Jenks for her contribution to the study selection process.  
32  
33  
34  
35  
36

#### 37 454 **Contributors**

38  
39 455 Conception and design: SB, RD, LvdW, MS, IvdAS. Collection and assembly of data: SB,  
40  
41 456 JvB. Analysis and interpretation of the data: SB, MS, IvdAS. Drafting of the article: SB.  
42  
43 457 Critical revision of the article for important intellectual content: SB, JvB, RD, LvdW, MS,  
44  
45 458 IvdAS. Final approval of the article: SB, JvB, RD, LvdW, MS, IvdAS. Obtaining of funding:  
46  
47 459 SB, RD, LvdW, MS, IvdAS.  
48  
49  
50  
51  
52

#### 53 461 **Funding**

54  
55 462 This study is supported by a scholarship from the University of Groningen/University  
56  
57 463 Medical Center Groningen (grant/award number: not applicable). The funders played no role  
58  
59  
60

1  
2  
3 464 in the study design, collection, analysis and interpretation of data, writing of the manuscript,  
4  
5 465 or the decision to submit the manuscript for publication.  
6  
7  
8 466

9  
10 467 **Conflict of interest**

11  
12 468 The authors report no potential conflicts of interest.  
13  
14 469

15  
16  
17 470 **Data availability statement**

18  
19 471 Data sharing is not applicable to this article as no new data were created or analyzed in this  
20  
21 472 study.  
22  
23 473

24  
25  
26 474 **Ethics approval**

27  
28 475 Ethics approval was not required for this study as it was a scoping review in which already  
29  
30 476 published articles were included.  
31  
32 477

33  
34  
35 478 **References**

- 36  
37 479  
38  
39  
40 480 1. Koninklijk Nederlands Genootschap voor Fysiotherapie (KNGF). KNGF-richtlijn  
41  
42 481 Artrose heup-knie. Conservatieve, pre- en postoperatieve behandeling [Internet]. 2018  
43  
44 482 [cited 2020 Aug 25]. Available from:  
45  
46 483 <https://www.kngf.nl/kennisplatform/richtlijnen/artrose-heup-knie>.  
47  
48  
49 484 2. Nederlands Huisartsen Genootschap (NHG). NHG-Standaard Niet-traumatische  
50  
51 485 knieklachten [Internet]. 2016 [cited 2020 Aug 25]. Available from:  
52  
53 486 <https://www.nhg.org/standaarden/samenvatting/niet-traumatische-knieklachten>.  
54  
55  
56 487 3. Nederlandse Orthopaedische Vereniging (NOV). Conservatieve behandeling van  
57  
58 488 artrose in heup of knie [Internet]. 2018 [cited 2020 Aug 25]. Available from:  
59  
60

- 1  
2  
3 489 [https://richtlijnendatabase.nl/richtlijn/artrose\\_in\\_heup\\_of\\_knie/startpagina\\_-\\_heup-](https://richtlijnendatabase.nl/richtlijn/artrose_in_heup_of_knie/startpagina_-_heup-)  
4  
5 490 [\\_of\\_knieartrose.html](https://richtlijnendatabase.nl/richtlijn/artrose_in_heup_of_knie/startpagina_-_heup-).  
6  
7  
8 491 4. Bannuru RR, Osani MC, Vaysbrot EE, Arden NK, Bennell K, Bierma-Zeinstra SMA,  
9  
10 492 et al. OARSI guidelines for the non-surgical management of knee, hip, and  
11  
12 493 polyarticular osteoarthritis. *Osteoarthr Cartilage* 2019; 27: 1578-89.  
13  
14 494 5. Fernandes L, Hagen KB, Bijlsma JWJ, Andreassen O, Christensen P, Conaghan PG, et  
15  
16 495 al. EULAR recommendations for the non-pharmacological core management of hip  
17  
18 496 and knee osteoarthritis. *Ann Rheum Dis* 2013; 72: 1125-35.  
19  
20 497 6. Fransen M, McConnell S, Hernandez-Molina G, Reichenbach S. Exercise for  
21  
22 498 osteoarthritis of the hip. *Cochrane Database Syst Rev*. 2014(4):CD007912.  
23  
24 499 DOI:10.1002/14651858.CD007912.pub2.  
25  
26 500 7. Fransen M, McConnell S, Harmer AR, Van der Esch M, Simic M, Bennell KL.  
27  
28 501 Exercise for osteoarthritis of the knee: a Cochrane systematic review. *Br J Sports Med*  
29  
30 502 2015; 49: 1554-7.  
31  
32 503 8. Messier SP, Loeser RF, Miller GD, Morgan TM, Rejeski WJ, Sevick MA, et al.  
33  
34 504 Exercise and dietary weight loss in overweight and obese older adults with knee  
35  
36 505 osteoarthritis: the Arthritis, Diet, and Activity Promotion Trial. *Arthritis Rheum* 2004;  
37  
38 506 50: 1501-10.  
39  
40 507 9. Paans N, van den Akker-Scheek I, Dilling RG, Bos M, van der Meer K, Bulstra SK, et  
41  
42 508 al. Effect of exercise and weight loss in people who have hip osteoarthritis and are  
43  
44 509 overweight or obese: a prospective cohort study. *Phys Ther* 2013; 93: 137-46.  
45  
46 510 10. Svege I, Nordsletten L, Fernandes L, Risberg MA. Exercise therapy may postpone  
47  
48 511 total hip replacement surgery in patients with hip osteoarthritis: a long-term follow-up  
49  
50 512 of a randomised trial. *Ann Rheum Dis* 2015; 74: 164-9.  
51  
52  
53  
54  
55  
56  
57  
58  
59  
60

- 1  
2  
3 513 11. Snijders GF, den Broeder AA, van Riel PL, Straten VH, de Man FH, van den Hoogen  
4  
5 514 FH, et al. Evidence-based tailored conservative treatment of knee and hip  
6  
7 515 osteoarthritis: between knowing and doing. *Scand J Rheumatol* 2011; 40: 225-31.  
8  
9  
10 516 12. Bennell KL, Dobson F, Hinman RS. Exercise in osteoarthritis: moving from  
11  
12 517 prescription to adherence. *Best Pract Res Clin Rheumatol* 2014; 28: 93-117.  
13  
14 518 13. Dobson F, Bennell KL, French SD, Nicolson PJ, Klaasman RN, Holden MA, et al.  
15  
16 519 Barriers and facilitators to exercise participation in people with hip and/or knee  
17  
18 520 osteoarthritis: synthesis of the literature using behavior change theory. *Am J Phys Med*  
19  
20 521 *Rehabil* 2016; 95: 372-89.  
21  
22  
23 522 14. Kanavaki AM, Rushton A, Efstathiou N, Alrushud A, Klocke R, Abhishek A, et al.  
24  
25 523 Barriers and facilitators of physical activity in knee and hip osteoarthritis: a systematic  
26  
27 524 review of qualitative evidence. *BMJ Open*. 2017;7(12):e017042.  
28  
29 525 DOI:10.1136/bmjopen-2017-017042  
30  
31  
32 526 15. Egerton T, Diamond LE, Buchbinder R, Bennell KL, Slade SC. A systematic review  
33  
34 527 and evidence synthesis of qualitative studies to identify primary care clinicians'  
35  
36 528 barriers and enablers to the management of osteoarthritis. *Osteoarthr Cartilage* 2017;  
37  
38 529 25: 625-38.  
39  
40  
41 530 16. Landelijke Huisartsen Vereniging (LHV)/Nederlands Huisartsen Genootschap (NHG).  
42  
43 531 Toekomstvisie Huisartsenzorg 2022 [Internet]. 2012 [cited 2020 Dec 21]. Available  
44  
45 532 from: <https://www.nhg.org/toekomstvisie>.  
46  
47  
48 533 17. Flottorp SA, Oxman AD, Krause J, Musila NR, Wensing M, Godycki-Cwirko M, et  
49  
50 534 al. A checklist for identifying determinants of practice: a systematic review and  
51  
52 535 synthesis of frameworks and taxonomies of factors that prevent or enable  
53  
54 536 improvements in healthcare professional practice. *Implement Sci*. 2013;8:35.  
55  
56 537 DOI:10.1186/1748-5908-8-35  
57  
58  
59  
60

- 1  
2  
3 538 18. Colquhoun HL, Levac D, O'Brien KK, Straus S, Tricco AC, Perrier L, et al. Scoping  
4  
5 539 reviews: time for clarity in definition, methods, and reporting. *J Clin Epidemiol* 2014;  
6  
7 540 67: 1291-4.  
8  
9  
10 541 19. Arksey H, O'Malley L. Scoping studies: towards a methodological framework. *Int J*  
11  
12 542 *Soc Res Method* 2005; 8: 19-32.  
13  
14 543 20. Tricco AC, Lillie E, Zarin W, O'Brien KK, Colquhoun H, Levac D, et al. PRISMA  
15  
16 544 Extension for Scoping Reviews (PRISMA-ScR): Checklist and Explanation. *Ann*  
17  
18 545 *Intern Med* 2018; 169: 467-73.  
19  
20  
21 546 21. Peters MDJ, Godfrey CM, McInerney P, Baldini Soares C, Khalil H, Parker D. The  
22  
23 547 Joanna Briggs Institute Reviewers' Manual 2015: Methodology for JBI scoping  
24  
25 548 reviews. Adelaide: The Joanna Briggs Institute 2015.  
26  
27  
28 549 22. Pluye P, Gagnon M-P, Griffiths F, Johnson-Lafleur J. A scoring system for appraising  
29  
30 550 mixed methods research, and concomitantly appraising qualitative, quantitative and  
31  
32 551 mixed methods primary studies in Mixed Studies Reviews. *Int J Nurs Stud* 2009; 46:  
33  
34 552 529-46.  
35  
36  
37 553 23. Hong QN, Pluye P, Fàbregues S, Bartlett G, Boardman F, Cargo M, et al. Mixed  
38  
39 554 Methods Appraisal Tool (MMAT), version 2018. Registration of Copyright  
40  
41 555 (#1148552), Canadian Intellectual Property Office, Industry Canada 2018.  
42  
43  
44 556 24. Garne-Dalgaard A, Mann S, Bredahl TVG, Stochkendahl MJ. Implementation  
45  
46 557 strategies, and barriers and facilitators for implementation of physical activity at work:  
47  
48 558 a scoping review. *Chiropr Man Therap.* 2019;27. DOI:10.1186/s12998-019-0268-5  
49  
50  
51 559 25. Weatherson KA, Gainforth HL, Jung ME. A theoretical analysis of the barriers and  
52  
53 560 facilitators to the implementation of school-based physical activity policies in Canada:  
54  
55 561 a mixed methods scoping review. *Implementation Sci.* 2017;12. DOI:10.1186/s13012-  
56  
57 562 017-0570-3  
58  
59  
60

- 1  
2  
3 563 26. Bouma SE, van Beek JFE, Alma MA, Diercks RL, van der Woude LHV, van den  
4  
5 564 Akker-Scheek I, et al. What affects the implementation of lifestyle interventions in  
6  
7 565 patients with osteoarthritis? A multidisciplinary focus group study among healthcare  
8  
9 566 professionals. *Disabil Rehabil* (forthcoming). DOI:10.1080/09638288.2021.2011438  
10  
11  
12 567 27. Allison K, Setchell J, Egerton T, Delany C, Bennell KL. In Theory, Yes; in Practice,  
13  
14 568 Uncertain: A Qualitative Study Exploring Physical Therapists' Attitudes Toward Their  
15  
16 569 Roles in Weight Management for People With Knee Osteoarthritis. *Phys Ther* 2019;  
17  
18 570 99: 601-11.  
19  
20  
21 571 28. Bossen D, Kloek C, Snippe HW, Dekker J, de Bakker D, Veenhof C. A Blended  
22  
23 572 Intervention for Patients With Knee and Hip Osteoarthritis in the Physical Therapy  
24  
25 573 Practice: Development and a Pilot Study. *JMIR Res Protoc* 2016; 5: e32.  
26  
27  
28 574 29. Christiansen MB, White DK, Christian J, Waugh E, Gakhal N, King L, et al. "It ...  
29  
30 575 doesn't always make it [to] the top of the list" Primary care physicians' experiences  
31  
32 576 with prescribing exercise for knee osteoarthritis. *Canadian Family Physician* 2020; 66:  
33  
34 577 e14-20.  
35  
36  
37 578 30. Davis AM, Kennedy D, Wong R, Robarts S, Skou ST, McGlasson R, et al. Cross-  
38  
39 579 cultural adaptation and implementation of Good Life with osteoarthritis in Denmark  
40  
41 580 (GLA:D™): group education and exercise for hip and knee osteoarthritis is feasible in  
42  
43 581 Canada. *Osteoarthritis Cartilage* 2018; 26: 211-9.  
44  
45  
46 582 31. de Rooij M, van der Leeden M, Avezaat E, Häkkinen A, Klaver R, Maas T, et al.  
47  
48 583 Development of comorbidity-adapted exercise protocols for patients with knee  
49  
50 584 osteoarthritis. *Clin Interv Aging* 2014; 9: 829-42.  
51  
52  
53 585 32. Egerton T, Nelligan R, Setchell J, Atkins L, Bennell KL. General practitioners'  
54  
55 586 perspectives on a proposed new model of service delivery for primary care  
56  
57 587 management of knee osteoarthritis: a qualitative study. *BMC Fam Pract* 2017; 18: 85.  
58  
59  
60

- 1  
2  
3 588 33. Egerton T, Nelligan RK, Setchell J, Atkins L, Bennell KL. General practitioners'  
4  
5 589 views on managing knee osteoarthritis: a thematic analysis of factors influencing  
6  
7 590 clinical practice guideline implementation in primary care. *BMC Rheumatol* 2018; 2:  
8  
9 591 30.
- 10  
11  
12 592 34. Hinman RS, Delany CM, Campbell PK, Gale J, Bennell KL. Physical Therapists,  
13  
14 593 Telephone Coaches, and Patients With Knee Osteoarthritis: Qualitative Study About  
15  
16 594 Working Together to Promote Exercise Adherence. *Phys Ther* 2016; 96: 479-93.
- 17  
18  
19 595 35. Hinman RS, Nelligan RK, Bennell KL, Delany C. "Sounds a Bit Crazy, But It Was  
20  
21 596 Almost More Personal:" A Qualitative Study of Patient and Clinician Experiences of  
22  
23 597 Physical Therapist-Prescribed Exercise For Knee Osteoarthritis Via Skype. *Arthritis*  
24  
25 598 *Care Res (Hoboken)* 2017; 69: 1834-44.
- 26  
27  
28 599 36. Knoop J, van der Leeden M, van der Esch M, de Rooij M, Peter WF, Bennell KL, et  
29  
30 600 al. Is a model of stratified exercise therapy by physical therapists in primary care  
31  
32 601 feasible in patients with knee osteoarthritis? : a mixed methods study. *Physiotherapy*  
33  
34 602 2020; 106: 101-10.
- 35  
36  
37 603 37. Law RJ, Nafees S, Hiscock J, Wynne C, Williams NH. A lifestyle management  
38  
39 604 programme focused on exercise, diet and physiotherapy support for patients with hip  
40  
41 605 or knee osteoarthritis and a body mass index over 35: A qualitative study.  
42  
43 606 *Musculoskeletal Care* 2019; 17: 145-51.
- 44  
45  
46 607 38. Lawford BJ, Delany C, Bennell KL, Hinman RS. "I Was Really Pleasantly Surprised":  
47  
48 608 Firsthand Experience and Shifts in Physical Therapist Perceptions of Telephone-  
49  
50 609 Delivered Exercise Therapy for Knee Osteoarthritis-A Qualitative Study. *Arthritis*  
51  
52 610 *Care Res (Hoboken)* 2019; 71: 545-57.
- 53  
54  
55 611 39. Lawford BJ, Bennell KL, Allison K, Schwartz S, Hinman RS. Challenges with  
56  
57 612 strengthening exercises for people with knee osteoarthritis and comorbid obesity: a



- 1  
2  
3 613 qualitative study with patients and physiotherapists. *Arthritis Care Res (Hoboken)*.  
4  
5 614 2020. DOI:10.1002/acr.24439  
6  
7  
8 615 40. Lawford BJ, Bennell KL, Jones SE, Keating C, Brown C, Hinman RS. "It's the single  
9  
10 616 best thing I've done in the last 10 years": a qualitative study exploring patient and  
11  
12 617 dietitian experiences with, and perceptions of, a multi-component dietary weight loss  
13  
14 618 program for knee osteoarthritis. *Osteoarthritis Cartilage* 2021; 29: 507-17.  
15  
16  
17 619 41. MacKay C, Hawker GA, Jaglal SB. Qualitative study exploring the factors influencing  
18  
19 620 physical therapy management of early knee osteoarthritis in Canada. *BMJ Open* 2018;  
20  
21 621 8: e023457.  
22  
23  
24 622 42. MacKay C, Hawker GA, Jaglal SB. How Do Physical Therapists Approach  
25  
26 623 Management of People With Early Knee Osteoarthritis? A Qualitative Study. *Phys*  
27  
28 624 *Ther* 2020; 100: 295-306.  
29  
30  
31 625 43. Mann C, Gooberman-Hill R. Health care provision for osteoarthritis: concordance  
32  
33 626 between what patients would like and what health professionals think they should  
34  
35 627 have. *Arthritis Care Res (Hoboken)* 2011; 63: 963-72.  
36  
37  
38 628 44. Miller KA, Osman F, Baier Manwell L. Patient and physician perceptions of knee and  
39  
40 629 hip osteoarthritis care: A qualitative study. *Int J Clin Pract* 2020; 74: e13627.  
41  
42  
43 630 45. Nielsen M, Keefe FJ, Bennell K, Jull GA. Physical therapist-delivered cognitive-  
44  
45 631 behavioral therapy: a qualitative study of physical therapists' perceptions and  
46  
47 632 experiences. *Phys Ther* 2014; 94: 197-209.  
48  
49  
50 633 46. Okwera A, May S. Views of general practitioners toward physiotherapy management  
51  
52 634 of osteoarthritis-a qualitative study. *Physiother Theory Pract* 2019; 35: 940-6.  
53  
54  
55 635 47. Poitras S, Rossignol M, Avouac J, Avouac B, Cedraschi C, Nordin M, et al.  
56  
57 636 Management recommendations for knee osteoarthritis: how usable are they? *Joint*  
58  
59 637 *Bone Spine* 2010; 77: 458-65.  
60

- 1  
2  
3 638 48. Rosemann T, Wensing M, Joest K, Backenstrass M, Mahler C, Szecsenyi J. Problems  
4  
5 639 and needs for improving primary care of osteoarthritis patients: the views of patients,  
6  
7 640 general practitioners and practice nurses. *BMC Musculoskel Dis* 2006; 7: 48.
- 8  
9  
10 641 49. Selten EMH, Vriezekolk JE, Nijhof MW, Schers HJ, van der Meulen-Dilling RG, van  
11  
12 642 der Laan WH, et al. Barriers Impeding the Use of Non-pharmacological, Non-surgical  
13  
14 643 Care in Hip and Knee Osteoarthritis: The Views of General Practitioners, Physical  
15  
16 644 Therapists, and Medical Specialists. *J Clin Rheumatol* 2017; 23: 405-10.
- 17  
18  
19 645 50. Tang CY, Pile R, Croft A, Watson NJ. Exploring Physical Therapist Adherence to  
20  
21 646 Clinical Guidelines When Treating Patients With Knee Osteoarthritis in Australia: A  
22  
23 647 Mixed Methods Study. *Phys Ther* 2020; 100: 1084-93.
- 24  
25  
26 648 51. Teo PL, Bennell KL, Lawford BJ, Egerton T, Dziedzic KS, Hinman RS.  
27  
28 649 Physiotherapists may improve management of knee osteoarthritis through greater  
29  
30 650 psychosocial focus, being proactive with advice, and offering longer-term reviews: a  
31  
32 651 qualitative study. *J Physiother* 2020; 66: 256-65.
- 33  
34  
35 652 52. Wallis JA, Ackerman IN, Brusco NK, Kemp JL, Sherwood J, Young K, et al. Barriers  
36  
37 653 and enablers to uptake of a contemporary guideline-based management program for  
38  
39 654 hip and knee osteoarthritis: A qualitative study. *Osteoarthritis and Cartilage Open*  
40  
41 655 2020; 2.
- 42  
43  
44 656 53. Cottrell E, Roddy E, Rathod T, Porcheret M, Foster NE. What influences general  
45  
46 657 practitioners' use of exercise for patients with chronic knee pain? Results from a  
47  
48 658 national survey. *BMC Fam Pract* 2016; 17: 172.
- 49  
50  
51 659 54. Duarte N, Hughes SL, Paúl C. Cultural adaptation and specifics of the Fit & Strong!  
52  
53 660 program in Portugal. *Transl Behav Med* 2019; 9: 67-75.
- 54  
55  
56  
57  
58  
59  
60

- 1  
2  
3 661 55. Hill DS, Freudmann M, Sergeant JC, Board T. Management of symptomatic knee  
4  
5 662 osteoarthritis in obesity: a survey of orthopaedic surgeons' opinions and practice. Eur J  
6  
7 663 Orthop Surg Traumatol 2018; 28: 967-74.
- 8  
9  
10 664 56. Hill D, Boyd A, Board T. Management of symptomatic knee osteoarthritis in obesity:  
11  
12 665 a survey of general practitioners' opinions and practice. Eur J Orthop Surg Traumatol  
13  
14 666 2018; 28: 1183-9.
- 15  
16  
17 667 57. Hofstede SN, Marang-van de Mheen PJ, Vliet Vlieland TP, van den Ende CH,  
18  
19 668 Nelissen RG, van Bodegom-Vos L. Barriers and Facilitators Associated with Non-  
20  
21 669 Surgical Treatment Use for Osteoarthritis Patients in Orthopaedic Practice. PLoS One  
22  
23 670 2016; 11: e0147406.
- 24  
25  
26 671 58. Lawford BJ, Bennell KL, Kasza J, Hinman RS. Physical Therapists' Perceptions of  
27  
28 672 Telephone- and Internet Video-Mediated Service Models for Exercise Management of  
29  
30 673 People With Osteoarthritis. Arthritis Care Res (Hoboken) 2018; 70: 398-408.
- 31  
32  
33 674 59. Reid DA, Potts G, Burnett M, Konings B. Physiotherapy management of knee and hip  
34  
35 675 osteoarthritis: a survey of patient and medical practitioners' expectations, experiences  
36  
37 676 and perceptions of effectiveness of treatment. New Zeal J Physiother 2014; 42: 118-  
38  
39 677 25.
- 40  
41  
42 678 60. de Rooij M, van der Leeden M, van der Esch M, Lems WF, Meesters JJL, Peter WF,  
43  
44 679 et al. Evaluation of an educational course for primary care physiotherapists on  
45  
46 680 comorbidity-adapted exercise therapy in knee osteoarthritis: an observational study.  
47  
48 681 Musculoskeletal Care 2020; 18: 122-33.
- 49  
50  
51 682 61. Holden MA, Nicholls EE, Young J, Hay EM, Foster NE. UK-based physical  
52  
53 683 therapists' attitudes and beliefs regarding exercise and knee osteoarthritis: findings  
54  
55 684 from a mixed-methods study. Arthritis Rheum 2009; 61: 1511-21.
- 56  
57  
58  
59  
60

- 1  
2  
3 685 62. Kloek CJJ, Bossen D, de Vries HJ, de Bakker DH, Veenhof C, Dekker J.  
4  
5 686 Physiotherapists' experiences with a blended osteoarthritis intervention: a mixed  
6  
7 687 methods study. *Physiother Theory Pract* 2020; 36: 572-9.  
8  
9  
10 688 63. Nissen N, Holm PM, Bricca A, Dideriksen M, Tang LH, Skou ST. Clinicians' beliefs  
11  
12 689 and attitudes to physical activity and exercise therapy as treatment for knee and/or hip  
13  
14 690 osteoarthritis: a scoping review. *Osteoarthritis Cartilage* (online ahead of print).  
15  
16 691 DOI:10.1016/j.joca.2021.11.008  
17  
18  
19 692 64. Slater H, Dear BF, Merolli MA, Li LC, Briggs AM. Use of eHealth technologies to  
20  
21 693 enable the implementation of musculoskeletal Models of Care: Evidence and practice.  
22  
23 694 *Best Pract Res Clin Rheumatol* 2016; 30: 483-502.  
24  
25  
26 695 65. Loeb AE, Rao SS, Ficke JR, Morris CD, Riley LH, Levin AS. Departmental  
27  
28 696 Experience and Lessons Learned With Accelerated Introduction of Telemedicine  
29  
30 697 During the COVID-19 Crisis. *J Am Acad Orthop Surg* 2020; 28: e469-76.  
31  
32  
33 698 66. Piga M, Cangemi I, Mathieu A, Cauli A. Telemedicine for patients with rheumatic  
34  
35 699 diseases: Systematic review and proposal for research agenda. *Semin Arthritis Rheum*  
36  
37 700 2017; 47: 121-8.  
38  
39  
40  
41 701

702 **Table 1.** Overview of included studies<sup>a</sup>

| Reference                                 | Country and health setting                                                    | Study focus                                                                                                                                       | Type of data extracted | Data collection method                     | Data analysis method                         | Participants                                              |
|-------------------------------------------|-------------------------------------------------------------------------------|---------------------------------------------------------------------------------------------------------------------------------------------------|------------------------|--------------------------------------------|----------------------------------------------|-----------------------------------------------------------|
| Allison <sup>27</sup> (2019)              | Australia (private primary care and public hospital care or community health) | Attitudes and perceptions toward role in weight management (knee OA)                                                                              | Qualitative            | Individual interviews                      | Inductive thematic analysis                  | PT (n=13, 61% female, age range 27-61 years)              |
| Bossen <sup>28</sup> (2016)               | The Netherlands (private practice)                                            | Development and feasibility of the blended exercise therapy intervention “e-Exercise” (hip and/or knee OA)                                        | Qualitative            | 1) Focus group<br>2) Individual interviews | 1) Summarizing<br>2) Thematic trend analysis | 1) PT (n=7)<br>2) PT (n=5)                                |
| Christiansen <sup>29</sup> (2020)         | Canada (academic and community family health practice)                        | Experiences with and barriers to prescribing exercise (knee OA)                                                                                   | Qualitative            | Individual interviews                      | Constant comparison approach                 | Physician (n=11)                                          |
| Davis <sup>30</sup> (2018)                | Canada (single assessment center)                                             | Implementation of the “Good Life with osteoArthritis in Denmark (GLA:D™) Canada” program (hip and/or knee OA)                                     | Qualitative            | Individual interviews                      | Thematic content analysis                    | PT (n=3)                                                  |
| De Rooij <sup>31</sup> (2014)             | The Netherlands (rehabilitation center)                                       | Development of comorbidity-adapted exercise protocols (knee OA)                                                                                   | Qualitative            | Individual interviews                      | Analyzing notes                              | PT (n=3)                                                  |
| Egerton <sup>32</sup> (2017) <sup>b</sup> | Australia (primary care)                                                      | Perspectives on potential barriers and facilitators to engagement with a proposed model of service delivery for primary care management (knee OA) | Qualitative            | Individual interviews                      | Interpretive thematic analysis               | GP (n=11, 64% female, mean age 50.8 years (range: 34-67)) |
| Egerton <sup>33</sup> (2018) <sup>b</sup> | Australia (primary care)                                                      | Barriers and facilitators influencing clinical practice guideline implementation in                                                               | Qualitative            | Individual interviews                      | Interpretive thematic analysis               | GP (n=11, 64% female)                                     |

[30]

| primary care (knee OA)         |                                 |                                                                                                                                   |             |                                                 |                                                       |                                                                                                                                                         |
|--------------------------------|---------------------------------|-----------------------------------------------------------------------------------------------------------------------------------|-------------|-------------------------------------------------|-------------------------------------------------------|---------------------------------------------------------------------------------------------------------------------------------------------------------|
| Hinman <sup>34</sup><br>(2016) | Australia (private practice)    | Experiences of being involved in delivering an integrated program of PT-supervised exercise and telephone coaching (knee OA)      | Qualitative | Individual interviews                           | Thematic analysis informed by grounded theory         | PT (n=10, 50% female, mean age 43 years (SD: 13))<br><br>Telephone coach (n=4; 100% female, mean age 42 years (SD: 11))                                 |
| Hinman <sup>35</sup><br>(2017) | Australia (not specified)       | Experiences using Skype as a service delivery model for PT-prescribed exercise management (knee OA)                               | Qualitative | Individual interviews                           | Thematic and constant comparative analytical approach | PT (n=8, 50% female, mean age 39 years (SD: 9))                                                                                                         |
| Knoop <sup>36</sup><br>(2020)  | The Netherlands (primary care)  | Feasibility of a newly developed model of stratified exercise therapy in primary care (knee OA)                                   | Qualitative | 1) Individual interviews<br><br>2) Focus group  | Analyzed descriptively                                | 1) PT (n=9)<br><br>2) PT (n=14)                                                                                                                         |
| Law <sup>37</sup> (2019)       | United Kingdom (leisure center) | Experiences and views of referring and delivering professionals regarding the “Lifestyle Management Program” (hip and/or knee OA) | Qualitative | 1) Focus groups<br><br>2) Individual interviews | Framework analysis method                             | 1) Dietician (n=2)<br><br>Exercise professional (n=3)<br><br>PT (n=4)<br><br>Triaging clinician (n=1)<br><br>2) GP (n=3)<br><br>Total group: 46% female |

1  
2  
3  
4  
5  
6  
7  
8  
9  
10  
11  
12  
13  
14  
15  
16  
17  
18  
19  
20  
21  
22  
23  
24  
25  
26  
27  
28  
29  
30  
31  
32  
33  
34  
35  
36  
37  
38  
39  
40  
41  
42  
43  
44  
45  
46

|                                             |                                                 |                                                                                                                          |             |                       |                                               |                                                                                                                                          |
|---------------------------------------------|-------------------------------------------------|--------------------------------------------------------------------------------------------------------------------------|-------------|-----------------------|-----------------------------------------------|------------------------------------------------------------------------------------------------------------------------------------------|
| Lawford <sup>38</sup><br>(2019)             | Australia (private and public practice)         | Pre- and post-intervention perceptions of telephone-delivered exercise therapy (knee OA)                                 | Qualitative | Individual interviews | Thematic analysis approach                    | PT (n=8, 50% female)                                                                                                                     |
| Lawford <sup>39</sup><br>(2020)             | Australia (private and public practice)         | Experiences and perceptions with prescribing a strengthening exercise program for people with comorbid obesity (knee OA) | Qualitative | Individual interviews | Inductive thematic approach                   | PT (n=7, 14% female)                                                                                                                     |
| Lawford <sup>40</sup><br>(2021)             | Australia (private and public practice)         | Experiences with a multi-component dietary weight loss program (knee OA)                                                 | Qualitative | Individual interviews | Thematic approach informed by grounded theory | Dietician (n=5, 100% female)                                                                                                             |
| MacKay <sup>41</sup><br>(2018) <sup>c</sup> | Canada (community-based and outpatient setting) | Factors influencing physical therapy management (knee OA)                                                                | Qualitative | Individual interviews | Inductive thematic analysis                   | PT (n=33, 76% female)                                                                                                                    |
| MacKay <sup>42</sup><br>(2020) <sup>c</sup> | Canada (community-based and outpatient setting) | Perceptions related to physical therapy management (knee OA)                                                             | Qualitative | Individual interviews | Inductive thematic analysis                   | PT (n=33, 76% female)                                                                                                                    |
| Mann <sup>43</sup> (2011)                   | United Kingdom (primary and secondary care)     | Perceptions of current service provision and possible service improvements (hip and/or knee OA)                          | Qualitative | Individual interviews | Framework method                              | GP (n=2)<br><br>Nurse practitioner (n=1)<br><br>Occupational therapist (n=1)<br><br>OS (n=2)<br><br>Practice nurse (n=3)<br><br>PT (n=2) |

|                               |                                                           |                                                                                                                                                                                    |             |                       |                                                                | RH (n=1)                                                                                                                                |
|-------------------------------|-----------------------------------------------------------|------------------------------------------------------------------------------------------------------------------------------------------------------------------------------------|-------------|-----------------------|----------------------------------------------------------------|-----------------------------------------------------------------------------------------------------------------------------------------|
| Miller <sup>44</sup> (2020)   | United States of America (large academic medical center)  | Barriers and facilitators to guideline-based treatment (hip and/or knee OA)                                                                                                        | Qualitative | Individual interviews | Conventional content analysis                                  | Physician (n=6, 50% female)                                                                                                             |
| Nielsen <sup>45</sup> (2014)  | Australia (not specified)                                 | Perspectives on and experiences with an intervention of exercise combined with cognitive behavioral therapy (Pain Coping Skills Training) and the implementation process (knee OA) | Qualitative | Individual interviews | Framework analysis                                             | PT (n=8, 88% female, age range 35-58 years)                                                                                             |
| Okwera <sup>46</sup> (2019)   | United Kingdom (general practice within NHS)              | Beliefs on physiotherapy management in primary care (hip and/or knee OA)                                                                                                           | Qualitative | Individual interviews | Framework analysis                                             | GP (n=8, 50% female, age range 31-60 years)                                                                                             |
| Poitras <sup>47</sup> (2010)  | France (general practice; work setting PTs not specified) | Barriers to use of conservative management recommendations (knee OA)                                                                                                               | Qualitative | Focus groups          | Thematic content analysis                                      | GP (n=7, 29% female, median age 53 years (range: 48-77))<br><br>PT (n=10, 40% female, median age 46.5 years (range: 24-69))             |
| Rosemann <sup>48</sup> (2006) | Germany (general practice)                                | Problems and needs for improving primary care (hip and/or knee OA)                                                                                                                 | Qualitative | Individual interviews | Description of coding process, but no specific method reported | GP (n=20, 20% female, mean age 43.5 years (range: 33-57))<br><br>Practice nurse (n=20, 100% female, mean age 41.3 years (range: 29-56)) |
| Selten <sup>49</sup> (2017)   | The Netherlands                                           | Views on non-pharmacological, non-                                                                                                                                                 | Qualitative | Individual            | Thematic analysis                                              | GP (n=5)                                                                                                                                |



|                               |                                                                                   |                                                                                                                                                                             |              |                       |                                    |                                                                                    |
|-------------------------------|-----------------------------------------------------------------------------------|-----------------------------------------------------------------------------------------------------------------------------------------------------------------------------|--------------|-----------------------|------------------------------------|------------------------------------------------------------------------------------|
|                               | (general practice; work setting PTs, OSs and RHs not specified)                   | surgical management (hip and/or knee OA)                                                                                                                                    |              | interviews            |                                    | OS (n=7)<br>PT (n=7)<br>RH (n=5)<br>Total group: 50% female, age range 24-64 years |
| Tang <sup>50</sup> (2020)     | Australia (large metropolitan public health service)                              | Application of clinical practice guidelines (knee OA)                                                                                                                       | Qualitative  | Individual interviews | Thematic analysis                  | PT (n=18)                                                                          |
| Teo <sup>51</sup> (2020)      | Australia (private practice and tertiary or non-tertiary hospitals)               | Experiences with delivering care (knee OA)                                                                                                                                  | Qualitative  | Individual interviews | Inductive thematic approach        | PT (n=22, 50% female, mean age 34 years (SD: 8, range: 24-54))                     |
| Wallis <sup>52</sup> (2020)   | Australia (general practice; OSs and RHs working in private and public hospitals) | Perceptions about management including barriers and enablers for referral to the “Good Life with osteoArthritis in Denmark (GLA:D®) Australia” program (hip and/or knee OA) | Qualitative  | Individual interviews | Inductive thematic analysis        | GP (n=5)<br>OS (n=6)<br>RH (n=4)<br>Total group: mean age 52 years (SD: 12)        |
| Cottrell <sup>53</sup> (2016) | United Kingdom (general practice)                                                 | Attitudes and beliefs regarding exercise (knee OA)                                                                                                                          | Quantitative | Survey (RR: 17%)      | Descriptive statistics (frequency) | GP (n=835, 51% female)                                                             |
| Duarte <sup>54</sup> (2019)   | Portugal (not specified)                                                          | Development and acceptability of the Portuguese version of the “Fit & Strong!” program (hip and/or knee OA)                                                                 | Quantitative | Survey (RR: 100%)     | Not reported                       | Program instructor (n=2)                                                           |
| Hill <sup>55</sup> (2018)     | United Kingdom                                                                    | Opinions and practices regarding the                                                                                                                                        | Quantitative | Survey (RR:           | Descriptive statistics             | OS (n=205)                                                                         |

|                               |                                                                |                                                                                                                                        |               |                                                  |                                                                        |                                                                                  |
|-------------------------------|----------------------------------------------------------------|----------------------------------------------------------------------------------------------------------------------------------------|---------------|--------------------------------------------------|------------------------------------------------------------------------|----------------------------------------------------------------------------------|
|                               | (specialist practice in knee surgery)                          | management of symptomatic OA in obesity (knee OA)                                                                                      |               | 52%)                                             | (frequency)                                                            |                                                                                  |
| Hill <sup>56</sup> (2018)     | United Kingdom (general practice)                              | Opinions and practices regarding the management of symptomatic OA in obesity (knee OA)                                                 | Quantitative  | Survey (RR: 75%)                                 | Descriptive statistics (frequency)                                     | GP (n=130)                                                                       |
| Hofstede <sup>57</sup> (2016) | The Netherlands (52% of OSs worked at a general hospital)      | Barriers and facilitators associated with prescription of different non-surgical treatments (hip and/or knee OA)                       | Quantitative  | Survey (RR: 36%)                                 | Descriptive statistics (frequency)                                     | OS (n=172, 9% female, mean age 48.4 years (SD: 8.6))                             |
| Lawford <sup>58</sup> (2018)  | Australia (private and public practice)                        | Perceptions of remotely-delivered service models for exercise management (hip and/or knee OA)                                          | Quantitative  | Survey (RR: unknown)                             | Descriptive statistics (frequency and level of agreement)              | PT (n=217, 72% female)                                                           |
| Reid <sup>59</sup> (2014)     | New Zealand (general practice; work setting OSs not specified) | Self-reported behavior, experiences, expectations and perceptions regarding physiotherapy referral and management (hip and/or knee OA) | Quantitative  | Survey (RR: 46% (GP) and 26% (OS))               | Descriptive statistics (frequency)                                     | GP (n=24)<br>OS (n=20)<br>Total group: 34% female, mean age 52.2 years (SD: 8.5) |
| De Rooij <sup>60</sup> (2020) | The Netherlands (primary care)                                 | Facilitators and barriers for usage of a strategy for exercise prescription in patients with comorbidity (knee OA)                     | Mixed-methods | 1) Survey (RR: 100%)<br>2) Individual interviews | 1) Descriptive statistics (frequency)<br>2) Summarizing notes          | 1) PT (n=34, 68% female, mean age 43.7 years (SD: 11.1))<br>2) PT (n=10)         |
| Holden <sup>61</sup> (2009)   | United Kingdom (NHS and non-NHS)                               | Attitudes and beliefs regarding exercise (knee OA)                                                                                     | Mixed-methods | 1) Survey (RR: 58%)<br>2) Individual interviews  | 1) Descriptive statistics (level of agreement)<br>2) Thematic analysis | 1) PT (n=538, 87% female)<br>2) PT (n=24, 67% female)                            |

1  
2  
3  
4  
5  
6  
7  
8  
9  
10  
11  
12  
13  
14  
15  
16  
17  
18  
19  
20  
21  
22  
23  
24  
25  
26  
27  
28  
29  
30  
31  
32  
33  
34  
35  
36  
37  
38  
39  
40  
41  
42  
43  
44  
45  
46

|                            |                                            |                                                                                                                                    |               |                                                 |                                                                         |                                                                             |
|----------------------------|--------------------------------------------|------------------------------------------------------------------------------------------------------------------------------------|---------------|-------------------------------------------------|-------------------------------------------------------------------------|-----------------------------------------------------------------------------|
| Kloek <sup>62</sup> (2020) | The Netherlands<br>(primary care practice) | Experiences with and determinants related to the usage of the blended physiotherapy intervention “e-Exercise” (hip and/or knee OA) | Mixed-methods | 1) Survey (RR: 40%)<br>2) Individual interviews | 1) Descriptive statistics (frequency)<br>2) Grounded theory methodology | 1) PT (n=49)<br>2) PT (n=9, 33% female, median age 52 years (range: 24-59)) |
|----------------------------|--------------------------------------------|------------------------------------------------------------------------------------------------------------------------------------|---------------|-------------------------------------------------|-------------------------------------------------------------------------|-----------------------------------------------------------------------------|

703 <sup>a</sup> GP: general practitioner; NHS: National Health Service; OA: osteoarthritis; OS: orthopedic surgeon; PT: physiotherapist; RH: rheumatologist; RR: response rate; SD:  
704 standard deviation.

705 <sup>b,c</sup> Data for both studies were collected during the same interview.

For peer review only

706 **Table 2.** Distribution of the extracted factors per included article across the domains, which were largely based on the Tailored Implementation  
 707 of Chronic Diseases checklist<sup>a</sup>

| Reference                            | Domain 1:<br>Intervention<br>factors | Domain 2:<br>Individual<br>HCP<br>factors | Domain 3:<br>Patient<br>factors | Domain 4:<br>Professional<br>interactions | Domain 5:<br>Incentives<br>and<br>resources | Domain 6:<br>Capacity for<br>organizational<br>change | Domain 7:<br>Social,<br>political,<br>and legal<br>factors | Domain 8:<br>Patient and<br>HCP<br>interactions | Domain 9:<br>Disease<br>factors | Total<br>number of<br>factors in<br>article |
|--------------------------------------|--------------------------------------|-------------------------------------------|---------------------------------|-------------------------------------------|---------------------------------------------|-------------------------------------------------------|------------------------------------------------------------|-------------------------------------------------|---------------------------------|---------------------------------------------|
| Allison <sup>27</sup><br>(2019)      |                                      | 3                                         |                                 | 2                                         | 2                                           | 1                                                     |                                                            | 4                                               |                                 | 12                                          |
| Bossen <sup>28</sup><br>(2016)       | 8                                    |                                           |                                 |                                           |                                             |                                                       |                                                            |                                                 |                                 | 8                                           |
| Christiansen <sup>29</sup><br>(2020) | 1                                    | 5                                         | 2                               |                                           |                                             |                                                       |                                                            | 1                                               |                                 | 9                                           |
| Davis <sup>30</sup><br>(2018)        | 6                                    |                                           | 1                               |                                           |                                             |                                                       |                                                            |                                                 |                                 | 7                                           |
| De Rooij <sup>31</sup><br>(2014)     | 3                                    | 2                                         |                                 |                                           |                                             |                                                       |                                                            |                                                 |                                 | 5                                           |
| Egerton <sup>32</sup><br>(2017)      | 20                                   | 3                                         | 1                               | 9                                         | 3                                           |                                                       |                                                            | 1                                               |                                 | 37                                          |
| Egerton <sup>33</sup><br>(2018)      | 5                                    | 9                                         | 5                               |                                           | 6                                           |                                                       | 1                                                          | 1                                               | 5                               | 32                                          |
| Hinman <sup>34</sup><br>(2016)       | 7                                    | 1                                         | 2                               | 10                                        |                                             |                                                       |                                                            |                                                 |                                 | 20                                          |
| Hinman <sup>35</sup>                 | 18                                   |                                           |                                 |                                           |                                             |                                                       |                                                            |                                                 |                                 | 18                                          |

[37]

1  
2  
3  
4  
5  
6  
7  
8  
9  
10  
11  
12  
13  
14  
15  
16  
17  
18  
19  
20  
21  
22  
23  
24  
25  
26  
27  
28  
29  
30  
31  
32  
33  
34  
35  
36  
37  
38  
39  
40  
41  
42  
43  
44  
45  
46

|                                 |    |    |    |    |   |   |  |   |    |
|---------------------------------|----|----|----|----|---|---|--|---|----|
| (2017)                          |    |    |    |    |   |   |  |   |    |
| Knoop <sup>36</sup><br>(2020)   | 4  |    | 1  | 1  |   |   |  |   | 6  |
| Law <sup>37</sup> (2019)        | 8  | 1  | 5  | 1  | 2 |   |  | 1 | 18 |
| Lawford <sup>38</sup><br>(2019) | 26 |    |    |    |   |   |  |   | 26 |
| Lawford <sup>39</sup><br>(2020) | 11 |    | 7  |    |   |   |  | 1 | 19 |
| Lawford <sup>40</sup><br>(2021) | 12 |    | 3  |    |   |   |  |   | 15 |
| MacKay <sup>41</sup><br>(2018)  | 6  | 5  | 14 | 7  | 6 | 2 |  | 1 | 41 |
| MacKay <sup>42</sup><br>(2020)  | 4  | 12 | 5  | 1  | 1 |   |  | 4 | 27 |
| Mann <sup>43</sup><br>(2011)    | 2  | 1  | 4  | 10 | 1 |   |  |   | 19 |
| Miller <sup>44</sup><br>(2020)  | 4  | 4  | 7  | 3  | 8 |   |  | 1 | 29 |
| Nielsen <sup>45</sup><br>(2014) | 13 | 8  | 1  |    | 3 | 2 |  |   | 27 |
| Okwera <sup>46</sup><br>(2019)  | 4  | 6  | 6  | 12 |   |   |  | 2 | 32 |
| Poitras <sup>47</sup>           | 11 | 13 | 19 | 3  |   |   |  | 1 | 52 |

|                                  |    |    |   |    |   |  |   |   |   |    |
|----------------------------------|----|----|---|----|---|--|---|---|---|----|
| (2010)                           |    |    |   |    |   |  |   |   |   |    |
| Rosemann <sup>48</sup><br>(2006) | 1  | 4  | 5 | 4  | 6 |  | 1 | 1 | 1 | 23 |
| Selten <sup>49</sup><br>(2017)   | 7  | 3  | 3 | 14 | 2 |  |   | 4 |   | 33 |
| Tang <sup>50</sup> (2020)        |    | 12 | 4 |    |   |  |   | 1 |   | 17 |
| Teo <sup>51</sup> (2020)         | 3  | 11 | 8 |    |   |  |   |   | 1 | 23 |
| Wallis <sup>52</sup><br>(2020)   | 17 |    | 7 | 3  | 2 |  |   |   | 1 | 30 |
| Cottrell <sup>53</sup><br>(2016) | 12 | 10 | 4 | 2  | 3 |  |   |   |   | 31 |
| Duarte <sup>54</sup><br>(2019)   | 1  |    | 2 |    |   |  |   |   |   | 3  |
| Hill <sup>55</sup> (2018)        |    | 5  |   | 2  |   |  |   |   |   | 7  |
| Hill <sup>56</sup> (2018)        | 2  | 4  |   | 2  |   |  |   |   |   | 8  |
| Hofstede <sup>57</sup><br>(2016) | 5  | 3  |   | 4  | 1 |  | 1 |   |   | 14 |
| Lawford <sup>58</sup><br>(2018)  | 33 |    |   |    |   |  |   |   |   | 33 |
| Reid <sup>59</sup> (2014)        | 4  | 1  | 3 | 1  |   |  |   |   |   | 9  |
| De Rooij <sup>60</sup><br>(2020) | 18 | 8  | 4 | 9  | 2 |  | 1 | 3 |   | 45 |

[39]

1  
2  
3  
4  
5  
6  
7  
8  
9  
10  
11  
12  
13  
14  
15  
16  
17  
18  
19  
20  
21  
22  
23  
24  
25  
26  
27  
28  
29  
30  
31  
32  
33  
34  
35  
36  
37  
38  
39  
40  
41  
42  
43  
44  
45  
46

|                                                      |            |            |            |            |           |          |          |           |           |            |
|------------------------------------------------------|------------|------------|------------|------------|-----------|----------|----------|-----------|-----------|------------|
| Holden <sup>61</sup><br>(2009)                       | 13         | 10         | 14         |            | 3         |          |          |           | 2         | 42         |
| Kloek <sup>62</sup><br>(2020)                        | 26         |            |            | 1          | 5         |          |          |           |           | 32         |
| <b>Total<br/>number of<br/>factors in<br/>domain</b> | <b>315</b> | <b>144</b> | <b>137</b> | <b>101</b> | <b>56</b> | <b>7</b> | <b>9</b> | <b>19</b> | <b>21</b> | <b>809</b> |

708 <sup>a</sup> HCP: healthcare professional.

For peer review only

709 **Table 3.** Overview of barriers, facilitators, and unclear factors that influence the implementation of LIs as perceived by HCPs for all domains,  
 710 which were largely based on the Tailored Implementation of Chronic Diseases checklist<sup>a</sup>

| Category                                                       | Subcategory – Barriers                                                                                                                                                                                                             | Subcategory – Facilitators                                                                                                                                                                                                                                                                                                                          | Subcategory – Unclear factors |
|----------------------------------------------------------------|------------------------------------------------------------------------------------------------------------------------------------------------------------------------------------------------------------------------------------|-----------------------------------------------------------------------------------------------------------------------------------------------------------------------------------------------------------------------------------------------------------------------------------------------------------------------------------------------------|-------------------------------|
| <i>Domain 1: Intervention factors (factors related to LIs)</i> |                                                                                                                                                                                                                                    |                                                                                                                                                                                                                                                                                                                                                     |                               |
| Effectiveness                                                  | - LIs have little or no effect on OA <sup>29,32,33,44,46,47,49,53,59,61</sup><br><br>- Potential effects of LIs are difficult to accomplish <sup>47,48,53,61</sup>                                                                 | - LIs have positive effects on affected joint(s) <sup>35,38,40-42,47,49,52,53,58,61</sup><br><br>- LIs have positive effects on general health <sup>33,40,47,49,56,57</sup><br><br>- LIs have positive mental effects <sup>30,35,37,38,40,49,52,57</sup><br><br>- LIs have positive effects (not further specified) <sup>34,37,44,49,52,54,57</sup> |                               |
| Safety                                                         | - LIs are unsafe or have negative effects <sup>39,47,52,61</sup>                                                                                                                                                                   | - LIs are safe <sup>53,57</sup><br><br>- Research environment or protocols provide a safety net <sup>31,35,38,39</sup>                                                                                                                                                                                                                              |                               |
| Design                                                         | - Non-optimal content or structure of LIs <sup>34,36,52,53,62</sup><br><br>- Challenges for patients during participation in LIs <sup>39,40,45</sup><br><br>- Challenges for HCPs during delivery of LIs <sup>28,30,39,60,62</sup> | - Positive experiences with or suggestions to improve the content or structure of LIs <sup>28,30,34,37,40,45,52,60,62</sup><br><br>- Ease for patients during participation in LIs <sup>39,40,52</sup><br><br>- Ease for HCPs during delivery of LIs <sup>30,31,34,39,45,60,62</sup>                                                                |                               |
| Personalized treatment                                         | - Insufficient ability to provide personalized treatment within LIs <sup>32,45,62</sup>                                                                                                                                            | - Ability and importance of providing personalized treatment within LIs <sup>37,39,42,45,47,51,53,60-62</sup>                                                                                                                                                                                                                                       |                               |
| Accessibility                                                  | - LIs are unavailable or                                                                                                                                                                                                           | - LIs are available or accessible, or suggestions for                                                                                                                                                                                                                                                                                               |                               |

[41]



1  
2  
3  
4  
5  
6  
7  
8  
9  
10  
11  
12  
13  
14  
15  
16  
17  
18  
19  
20  
21  
22  
23  
24  
25  
26  
27  
28  
29  
30  
31  
32  
33  
34  
35  
36  
37  
38  
39  
40  
41  
42  
43  
44  
45  
46

|                                                                                                    |                                                                                                                        |                                                                                                                     |                                     |
|----------------------------------------------------------------------------------------------------|------------------------------------------------------------------------------------------------------------------------|---------------------------------------------------------------------------------------------------------------------|-------------------------------------|
|                                                                                                    | inaccessible <sup>28,33,41,43,44,53,56,59,61</sup>                                                                     | improvement <sup>32,37,41,46,57,59</sup>                                                                            |                                     |
|                                                                                                    | - Costs of LIs to patients <sup>32,33,41,44,51,52</sup>                                                                | - LIs are feasible or sustainable <sup>32,36,37,42,60</sup>                                                         |                                     |
|                                                                                                    | - LIs are not feasible or sustainable <sup>32,60</sup>                                                                 | - Convenience for patients when accessing LIs <sup>52</sup>                                                         |                                     |
|                                                                                                    | - Inconvenience to patients when accessing LIs <sup>51-53</sup>                                                        |                                                                                                                     |                                     |
| Telehealth                                                                                         | - Disadvantages of telehealth in terms of effectiveness <sup>32,58,62</sup>                                            | - Benefits of telehealth in terms of effectiveness <sup>28,35,38,58,62</sup>                                        |                                     |
|                                                                                                    | - Telehealth is not safe for patients or patient/data privacy <sup>32,58</sup>                                         | - Telehealth is safe for patients or patient/data privacy <sup>35,58,62</sup>                                       |                                     |
|                                                                                                    | - Challenges for HCPs regarding lack of physical/visual contact <sup>35,38,58,62</sup>                                 | - Lack of physical/visual contact not a major issue for HCPs <sup>35,38,58</sup>                                    |                                     |
|                                                                                                    | - Other challenges for HCPs regarding feasibility of telehealth <sup>28,32,35,38,58,62</sup>                           | - Positive attitude or needs of HCPs regarding feasibility of telehealth <sup>35,38,40,58,62</sup>                  |                                     |
|                                                                                                    | - Patient-related challenges regarding feasibility of telehealth <sup>28,32,62</sup>                                   | - Patient-related benefits regarding feasibility of telehealth <sup>28,32,35,38,58</sup>                            |                                     |
|                                                                                                    | - Negative aspects regarding communication and relationship using telehealth <sup>34,35,38,40</sup>                    | - Positive aspects regarding communication and relationship using telehealth <sup>38,40</sup>                       |                                     |
| <i>Domain 2: Individual HCP factors (factors related to individual primary and secondary HCPs)</i> |                                                                                                                        |                                                                                                                     |                                     |
| Expertise                                                                                          | - Lack of knowledge or skills around LIs or promoting behavioral change <sup>27,29,33,41,42,45,47,49-51,56,60,61</sup> | - Having or improving knowledge or skills around LIs or promoting behavioral change <sup>33,34,41,42,45,46,50</sup> | - Clinical experience <sup>42</sup> |
|                                                                                                    | - Lack of knowledge or skills around OA care in general <sup>43,44,46,48</sup>                                         | - Having or improving knowledge or skills around OA care in general <sup>33,44,46,48</sup>                          |                                     |
|                                                                                                    | - Lack of knowledge or skills around specific                                                                          | - Available resources might improve knowledge and decision-making <sup>31,50,60</sup>                               |                                     |

[42]

|                                                                                                                 |                                                                                                                                                                                                           |                                                                                                                                                                                                                 |                                                                                                            |
|-----------------------------------------------------------------------------------------------------------------|-----------------------------------------------------------------------------------------------------------------------------------------------------------------------------------------------------------|-----------------------------------------------------------------------------------------------------------------------------------------------------------------------------------------------------------------|------------------------------------------------------------------------------------------------------------|
|                                                                                                                 | resources <sup>33,50,60</sup>                                                                                                                                                                             |                                                                                                                                                                                                                 |                                                                                                            |
| Attitude                                                                                                        | - Negative attitude toward LIs <sup>29,53,61</sup><br>- Negative attitude toward guidelines or protocols <sup>46</sup>                                                                                    | - Positive attitude toward LIs <sup>33,41,42,45-47,50,51,53,55-57,59</sup><br>- Positive attitude toward guidelines or protocols <sup>27,57,60</sup>                                                            | - Autonomy <sup>37</sup>                                                                                   |
| Role                                                                                                            | - Perception of own role potentially impeding prescription or follow-up of LIs <sup>29,33,42,44,47-51,53,55,61</sup><br>- Negative consequences for own role when referring patients to LIs <sup>32</sup> | - Perception of own role potentially stimulating prescription or follow-up of LIs <sup>33,41,42,47,48,51,53,55,56,61</sup><br>- Positive consequences for own role when referring patients to LIs <sup>32</sup> |                                                                                                            |
| <i>Domain 3: Patient factors (factors related to patients with hip and/or knee OA)</i>                          |                                                                                                                                                                                                           |                                                                                                                                                                                                                 |                                                                                                            |
| Health status                                                                                                   | - Severity of disease and symptoms <sup>32,44,47,50,52,61</sup><br>- Negative impact of comorbidities <sup>29,39,44,47,48,51,52</sup><br>- Other patient characteristics <sup>47,52,59</sup>              | - Severity of disease and symptoms <sup>39,47,53,59,61</sup><br>- Other patient characteristics <sup>41,51,59</sup>                                                                                             | - Severity of disease and symptoms <sup>42,46,53,61</sup><br>- Other patient characteristics <sup>41</sup> |
| Treatment expectations and preferences                                                                          | - Negative attitude toward LIs <sup>29,33,34,36,39,41-48,51-53,60,61</sup><br>- Positive attitude toward TJA <sup>37,43,48</sup>                                                                          | - Make use of patients' preference for TJA within LIs <sup>37</sup>                                                                                                                                             | - Patients' preferences <sup>46</sup>                                                                      |
| Active participation                                                                                            | - Low patient adherence or engagement <sup>33,37,41,42,46,47,51,54,61</sup>                                                                                                                               | - High patient adherence or engagement <sup>34,39,40,54</sup><br>- Importance of high patient adherence or engagement for effectiveness of LIs <sup>30,41,42,47,53,61</sup>                                     |                                                                                                            |
| Capabilities                                                                                                    | - Low health literacy <sup>33,37,39-41,43,44,47,49,51,52,60,61</sup><br>- Limited financial resources <sup>41,44</sup><br>- Other responsibilities <sup>41,52</sup>                                       | - High health literacy or importance of education <sup>39,42,43,49,51,60</sup><br>- Social support <sup>40,48</sup>                                                                                             | - Health literacy <sup>46</sup><br>- Other responsibilities <sup>41</sup>                                  |
| <i>Domain 4: Professional interactions (factors related to interactions between primary and secondary HCPs)</i> |                                                                                                                                                                                                           |                                                                                                                                                                                                                 |                                                                                                            |

|                                      |                                                                                                                                            |                                                                                                                                                                             |                                                                                                                                                                                                                |
|--------------------------------------|--------------------------------------------------------------------------------------------------------------------------------------------|-----------------------------------------------------------------------------------------------------------------------------------------------------------------------------|----------------------------------------------------------------------------------------------------------------------------------------------------------------------------------------------------------------|
| 1<br>2<br>3<br>4<br>5<br>6<br>7<br>8 | Collaboration                                                                                                                              | - Non-optimal interdisciplinary collaboration or healthcare provision <sup>27,32,34,41,43,46,47,49,53,60</sup><br><br>- No access to other HCPs <sup>41</sup>               | - Good interdisciplinary collaboration or healthcare provision, or suggestions for improvement <sup>27,32,34,37,41,43,44,46-49,52,53,55-57,59,60,62</sup><br><br>- Access to other HCPs <sup>32,41-43,46</sup> |
| 9<br>10<br>11<br>12<br>13            | Communication and referral                                                                                                                 | - Lack of communication between HCPs <sup>46,48,60</sup><br><br>- Challenges of communication and referral procedures <sup>34,36,44,46,60</sup>                             | - Improving communication between HCPs <sup>32,34,46,48,52,57</sup><br><br>- Needs regarding communication and referral procedures <sup>32,41,46,49,52</sup>                                                   |
| 14<br>15                             | <i>Domain 5: Incentives and resources (factors related to the availability of incentives and resources for primary and secondary HCPs)</i> |                                                                                                                                                                             |                                                                                                                                                                                                                |
| 16<br>17<br>18<br>19<br>20<br>21     | Time                                                                                                                                       | - Lack of time within patient consultations <sup>33,41,43-45,49,53,61</sup><br><br>- Lack of time due to other demands (or not further specified) <sup>32,37,41,48,62</sup> | - Adequate duration of patient consultations <sup>33,41</sup><br><br>- Adequate duration of specific interventions or protocols <sup>32,45,60,62</sup>                                                         |
| 22<br>23                             | Financial resources                                                                                                                        | - Limited financial resources within organization <sup>45,48</sup>                                                                                                          | - Financial reward for implementing LIs <sup>32,48,60</sup>                                                                                                                                                    |
| 24<br>25<br>26<br>27<br>28           | Information resources                                                                                                                      | - Lack of information resources <sup>27,37,44,48</sup><br><br>- Challenges in accessing information resources <sup>41,44,53</sup>                                           | - Availability of information resources <sup>27,44,52,57</sup><br><br>- Access to information resources <sup>33,41,42,52</sup>                                                                                 |
| 29<br>30<br>31<br>32                 | Facilities                                                                                                                                 | - Negative attitude toward information technology <sup>33</sup>                                                                                                             | - Potential use of information technology <sup>33,44</sup><br><br>- Benefits of working in health centers <sup>49</sup>                                                                                        |
| 33<br>34                             | <i>Domain 6: Capacity for organizational change (factors related to the organization where primary and secondary HCPs work)</i>            |                                                                                                                                                                             |                                                                                                                                                                                                                |
| 35<br>36<br>37                       | Professional paradigm                                                                                                                      |                                                                                                                                                                             | - Adequate professional paradigm or suggestions for expansion <sup>27,41,45</sup>                                                                                                                              |
| 38<br>39<br>40                       | Monitoring                                                                                                                                 |                                                                                                                                                                             | - Audit <sup>57</sup>                                                                                                                                                                                          |

Support within the organization - Management not supportive<sup>60</sup>

*Domain 7: Social, political, and legal factors (factors related to the social, political, and legal context)*

Healthcare system - Restrictions due to health insurance<sup>41,48,60</sup> - Benefits of good health insurance<sup>44,46,60</sup>  
- Government subsidies<sup>33</sup>

*Domain 8: Patient and HCP interactions (factors related to interactions between patients with hip and/or knee OA and primary and secondary HCPs)*

Therapeutic alliance - Potential negative influence of implementing LIs to relationship<sup>37</sup> - Importance of communication and relationship<sup>39,42,48,49</sup>

Lifestyle as conversation topic - Challenges of discussing weight<sup>27,33,42,49,50</sup> - Factors that could ease the way to discussing weight<sup>27,42,44,47,49</sup>

*Domain 9: Disease factors (factors related to OA)*

Image - OA seen as low priority<sup>29,32,43,46-48</sup> - Optimistic views toward OA<sup>33,47</sup>  
- OA seen as untreatable and local condition (wear-and-tear)<sup>33,44,46,47,51,52,61</sup>

711 <sup>a</sup> HCP: healthcare professional; LI: lifestyle intervention; OA: osteoarthritis; TJA: total joint arthroplasty.

712 **Table 4.** Ranking of the ten largest subcategories of barriers<sup>a</sup>

| Rank | Subcategory of barriers ( <i>domain</i> )                                                                          | Factors (n) |
|------|--------------------------------------------------------------------------------------------------------------------|-------------|
| 1    | Non-optimal interdisciplinary collaboration or healthcare provision ( <i>4 – professional interactions</i> )       | 31          |
| 2    | Negative attitude toward LIs ( <i>3 – patient factors</i> )                                                        | 28          |
| 3    | Low health literacy ( <i>3 – patient factors</i> )                                                                 | 24          |
|      | Lack of knowledge or skills around LIs or promoting behavioral change ( <i>2 – individual HCP factors</i> )        | 24          |
| 5    | Perception of own role potentially impeding prescription or follow-up of LIs ( <i>2 – individual HCP factors</i> ) | 23          |
| 6    | Severity of disease and symptoms ( <i>3 – patient factors</i> )                                                    | 17          |
| 7    | Other challenges for HCPs regarding feasibility of telehealth ( <i>1 – intervention factors</i> )                  | 16          |
| 8    | LIs have little or no effect on OA ( <i>1 – intervention factors</i> )                                             | 14          |
| 9    | Lack of time within patient consultations ( <i>5 – incentives and resources</i> )                                  | 12          |
|      | LIs are unavailable or inaccessible ( <i>1 – intervention factors</i> )                                            | 12          |

713 <sup>a</sup> HCP: healthcare professional; LI: lifestyle intervention; OA: osteoarthritis.

714 **Table 5.** Ranking of the ten largest subcategories of facilitators<sup>a</sup>

| Rank | Subcategory of facilitators ( <i>domain</i> )                                                                                         | Factors (n) |
|------|---------------------------------------------------------------------------------------------------------------------------------------|-------------|
| 1    | Good interdisciplinary collaboration or healthcare provision, or suggestions for improvement ( <i>4 – professional interactions</i> ) | 40          |
| 2    | Perception of own role potentially stimulating prescription or follow-up of LIs ( <i>2 – individual HCP factors</i> )                 | 27          |
| 3    | Positive experiences with or suggestions to improve the content or structure of LIs ( <i>1 – intervention factors</i> )               | 24          |
| 4    | Positive attitude toward LIs ( <i>2 – individual HCP factors</i> )                                                                    | 22          |
| 5    | Positive attitude or needs of HCPs regarding feasibility of telehealth ( <i>1 – intervention factors</i> )                            | 18          |
|      | Ease for HCPs during delivery of LIs ( <i>1 – intervention factors</i> )                                                              | 18          |
| 7    | LIs have positive effects on affected joint(s) ( <i>1 – intervention factors</i> )                                                    | 17          |
| 8    | Patient-related benefits regarding feasibility of telehealth ( <i>1 – intervention factors</i> )                                      | 16          |
| 9    | Ability and importance of providing personalized treatment within LIs ( <i>1 – intervention factors</i> )                             | 15          |
| 10   | Having or improving knowledge or skills around LIs or promoting behavioral change ( <i>2 – individual HCP factors</i> )               | 14          |

715 <sup>a</sup> HCP: healthcare professional; LI: lifestyle intervention.



Figure 1. Flowchart of the study selection process

260x217mm (96 x 96 DPI)

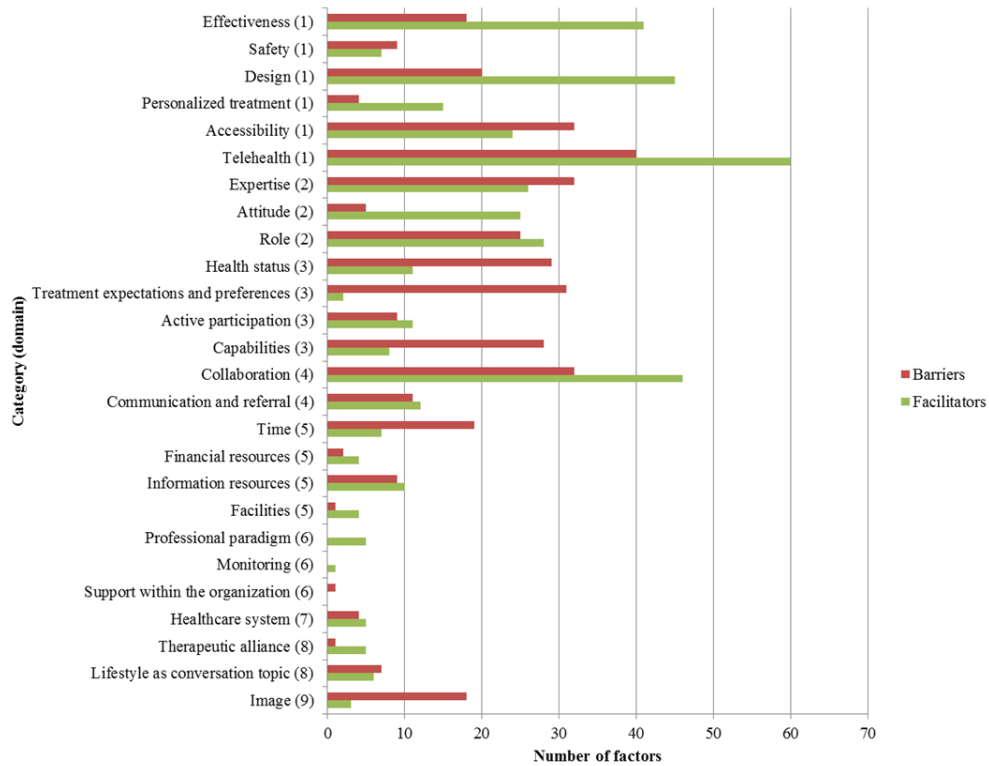

Figure 2. Overview of the number of barriers and facilitators per category  
 The domain numbers indicated in brackets refer to the domains as presented in Table 3: (1) intervention factors; (2) individual HCP factors; (3) patient factors; (4) professional interactions; (5) incentives and resources; (6) capacity for organizational change; (7) social, political, and legal factors; (8) patient and HCP interactions; (9) disease factors. Unclear factors were not included in this figure due to the low number (n=11).

282x219mm (96 x 96 DPI)



**Supplemental File 1.** Search strategies for the different databases

The search strategies presented below were applied in five bibliographic electronic databases on two different dates: initially on 19 February 2019 and again on 19 January 2021 to update the results. For each database it is shown below which search strategy was used in 2019 (#1) and in 2021 (#2) and how many records were retrieved using these search strategies.

PubMed

|                           |                                                                                                                                                                                                                                                                                                                                                                                                                                                                                                                                                                                                                                                                                                                                                                                                                                                                                                                                                                                                                                                                                                                                                                                                                                                                                                                                                                                                                                                                                                                                                                                                                                                                                                                                                                                                                                                                                                                                                                                                                                                                                                                                                                                                                                                                                                                                                                                                                                                                                                                                                                                                                                                                                                                                                                                                                                                                                                                                                                                       |
|---------------------------|---------------------------------------------------------------------------------------------------------------------------------------------------------------------------------------------------------------------------------------------------------------------------------------------------------------------------------------------------------------------------------------------------------------------------------------------------------------------------------------------------------------------------------------------------------------------------------------------------------------------------------------------------------------------------------------------------------------------------------------------------------------------------------------------------------------------------------------------------------------------------------------------------------------------------------------------------------------------------------------------------------------------------------------------------------------------------------------------------------------------------------------------------------------------------------------------------------------------------------------------------------------------------------------------------------------------------------------------------------------------------------------------------------------------------------------------------------------------------------------------------------------------------------------------------------------------------------------------------------------------------------------------------------------------------------------------------------------------------------------------------------------------------------------------------------------------------------------------------------------------------------------------------------------------------------------------------------------------------------------------------------------------------------------------------------------------------------------------------------------------------------------------------------------------------------------------------------------------------------------------------------------------------------------------------------------------------------------------------------------------------------------------------------------------------------------------------------------------------------------------------------------------------------------------------------------------------------------------------------------------------------------------------------------------------------------------------------------------------------------------------------------------------------------------------------------------------------------------------------------------------------------------------------------------------------------------------------------------------------------|
| <p>#1<br/>(1798 hits)</p> | <p>(((((("Health Personnel"[Mesh] OR "Delivery of Health Care"[Mesh] OR "Primary Health Care"[Mesh]) OR (Health personnel*[tiab] OR Health professional*[tiab] OR Medical staff*[tiab] OR Clinician*[tiab] OR Medical specialist*[tiab] OR Health care*[tiab] OR Healthcare*[tiab] OR Primary care*[tiab] OR Secondary care*[tiab] OR Allied health personnel*[tiab] OR Allied health professional*[tiab] OR Paramedic*[tiab] OR Nurse*[tiab] OR Nursing staff*[tiab] OR Nurse practit*[tiab] OR Physician assistant*[tiab] OR Physicians assistant*[tiab] OR Nutritionist*[tiab] OR Dietician*[tiab] OR Dietitian*[tiab] OR Physical therapist*[tiab] OR Physiotherapist*[tiab] OR Lifestyle coach*[tiab] OR Lifestyle counselor*[tiab] OR Physician*[tiab] OR Orthopedic surgeon*[tiab] OR Orthopedist*[tiab] OR General practitioner*[tiab] OR General practice*[tiab] OR Psychologist*[tiab]))) AND<br/> AND<br/> (((("Osteoarthritis"[Mesh] OR (Osteoarthrit*[tiab] OR Osteoarthro*[tiab] OR Degenerative arthrit*[tiab]))) AND (((("Hip Joint"[Mesh] OR "Knee Joint"[Mesh] OR "Lower Extremity"[Mesh]) OR (Hip*[tiab] OR Cox*[tiab] OR Acetabulofemoral joint*[tiab] OR Knee*[tiab] OR Superior tibulofibular joint*[tiab] OR Patellofemoral*[tiab] OR Lower extremit*[tiab] OR Lower limb*[tiab]))) AND<br/> AND<br/> ((((("Life Style"[Mesh] OR "Behavior"[Mesh]) OR (Life style*[tiab] OR Lifestyle*[tiab] OR Behavior*[tiab] OR Behaviour*[tiab] OR Habit*[tiab] OR Risk reduction*[tiab] OR Early therap*[tiab] OR Secondary prevention*[tiab] OR Tertiary prevention*[tiab] OR Disease prevention*[tiab]))) OR<br/> (((("Exercise"[Mesh] OR "Exercise Therapy"[Mesh] OR "Sports"[Mesh]) OR (Physical activit*[tiab] OR Physical training*[tiab] OR Physical fitness*[tiab] OR Physical condition*[tiab] OR Physical therap*[tiab] OR Physiotherap*[tiab] OR Exercis*[tiab] OR Run*[tiab] OR Jog*[tiab] OR Walk*[tiab] OR Bicycl*[tiab] OR Swim*[tiab] OR Strength*[tiab] OR Resistance*[tiab] OR Sport*[tiab] OR Athletic*[tiab] OR Train*[tiab] OR Sedentary[tiab]))) OR (((("Diet, Food, and Nutrition"[Mesh] OR "Nutrition Therapy"[Mesh] OR "Body Weight"[Mesh]) OR (Healthy diet*[tiab] OR Healthy eating*[tiab] OR Nutrition*[tiab] OR Diet*[tiab] OR Food*[tiab] OR Weight loss*[tiab] OR Weight loss program*[tiab] OR Weight reduction*[tiab] OR Weight reduction program*[tiab] OR Body weight*[tiab] OR Overweight*[tiab] OR Obesity*[tiab] OR Overnutrition*[tiab] OR Hypernutrition*[tiab]))) AND<br/> AND<br/> (((("Attitude"[Mesh] OR "Motivation"[Mesh]) OR (Barrier*[tiab] OR Facilitator*[tiab] OR Enabler*[tiab] OR Driver*[tiab] OR Motivat*[tiab] OR Opinion*[tiab] OR View*[tiab] OR Attitude*[tiab] OR Expectation*[tiab] OR Incentive*[tiab] OR Disincentive*[tiab] OR Belief*[tiab] OR Influencing factor*[tiab] OR Experience*[tiab] OR Perspective*[tiab] OR Perception*[tiab] OR Hinder*[tiab] OR Impediment*[tiab] OR obstacle*[tiab])))</p> |
| <p>#2<br/>(467 hits)</p>  | <p>#1 AND ((("2019/01/01"[Date - Create] : "3000"[Date - Create]) OR ("2019/01/01"[Date - Entry] : "3000"[Date - Entry]) OR ("2019/01/01"[Date - MeSH] : "3000"[Date - MeSH]))</p>                                                                                                                                                                                                                                                                                                                                                                                                                                                                                                                                                                                                                                                                                                                                                                                                                                                                                                                                                                                                                                                                                                                                                                                                                                                                                                                                                                                                                                                                                                                                                                                                                                                                                                                                                                                                                                                                                                                                                                                                                                                                                                                                                                                                                                                                                                                                                                                                                                                                                                                                                                                                                                                                                                                                                                                                    |

Embase

|           |                                                                                                                                                            |
|-----------|------------------------------------------------------------------------------------------------------------------------------------------------------------|
| <p>#1</p> | <p>('health care personnel'/exp OR 'health care delivery'/exp OR ('Health personnel*' OR 'Health professional*' OR 'Medical staff*' OR 'Clinician*' OR</p> |
|-----------|------------------------------------------------------------------------------------------------------------------------------------------------------------|

|                   |                                                                                                                                                                                                                                                                                                                                                                                                                                                                                                                                                                                                                                                                                                                                                                                                                                                                                                                                                                                                                                                                                                                                                                                                                                                                                                                                                                                                                                                                                                                                                                                                                                                                                                                                                                                                                                                                                                                                                                                                                                                                                                                                                                                                                                                                                                                                                                    |
|-------------------|--------------------------------------------------------------------------------------------------------------------------------------------------------------------------------------------------------------------------------------------------------------------------------------------------------------------------------------------------------------------------------------------------------------------------------------------------------------------------------------------------------------------------------------------------------------------------------------------------------------------------------------------------------------------------------------------------------------------------------------------------------------------------------------------------------------------------------------------------------------------------------------------------------------------------------------------------------------------------------------------------------------------------------------------------------------------------------------------------------------------------------------------------------------------------------------------------------------------------------------------------------------------------------------------------------------------------------------------------------------------------------------------------------------------------------------------------------------------------------------------------------------------------------------------------------------------------------------------------------------------------------------------------------------------------------------------------------------------------------------------------------------------------------------------------------------------------------------------------------------------------------------------------------------------------------------------------------------------------------------------------------------------------------------------------------------------------------------------------------------------------------------------------------------------------------------------------------------------------------------------------------------------------------------------------------------------------------------------------------------------|
| (3036 hits)       | <p>'Medical specialist*' OR 'Health care*' OR 'Healthcare*' OR 'Primary care*' OR 'Secondary care*' OR 'Allied health personnel*' OR 'Allied health professional*' OR 'Paramedic*' OR 'Nurse*' OR 'Nursing staff*' OR 'Nurse practit*' OR 'Physician assistant*' OR 'Physicians assistant*' OR 'Nutritionist*' OR 'Dietician*' OR 'Dietitian*' OR 'Physical therapist*' OR 'Physiotherapist*' OR 'Lifestyle coach*' OR 'Lifestyle counselor*' OR 'Physician*' OR 'Orthopedic surgeon*' OR 'Orthopedist*' OR 'General practitioner*' OR 'General practice*' OR 'Psychologist*'):ab,ti)</p> <p><b>AND</b></p> <p>('osteoarthritis'/exp OR ('Osteoarthritis*' OR 'Osteoarthro*' OR 'Degenerative arthrit*'):ab,ti) AND ('lower limb'/exp OR ('Hip*' OR 'Cox*' OR 'Acetabulofemoral joint*' OR 'Knee*' OR 'Superior tibulofibular joint*' OR 'Patellofemoral*' OR 'Lower extremit*' OR 'Lower limb*'):ab,ti)</p> <p><b>AND</b></p> <p>((('lifestyle'/exp OR 'lifestyle modification'/exp OR 'behavior'/exp OR ('Life style*' OR 'Lifestyle*' OR 'Behavior*' OR 'Behaviour*' OR 'Habit*' OR 'Risk reduction*' OR 'Early therap*' OR 'Secondary prevention*' OR 'Tertiary prevention*' OR 'Disease prevention*'):ab,ti) OR ('exercise'/exp OR 'kinesiotherapy'/exp OR 'sport'/exp OR ('Physical activit*' OR 'Physical training*' OR 'Physical fitness*' OR 'Physical condition*' OR 'Physical therap*' OR 'Physiotherap*' OR 'Exercis*' OR 'Run*' OR 'Jog*' OR 'Walk*' OR 'Bicycl*' OR 'Swim*' OR 'Strength*' OR 'Resistance*' OR 'Sport*' OR 'Athletic*' OR 'Train*' OR 'Sedentary*'):ab,ti) OR ('nutrition'/exp OR 'diet therapy'/exp OR 'body weight'/exp OR 'body weight management'/exp OR ('Healthy diet*' OR 'Healthy eating*' OR 'Nutrition*' OR 'Diet*' OR 'Food*' OR 'Weight loss*' OR 'Weight loss program*' OR 'Weight reduction*' OR 'Weight reduction program*' OR 'Body weight*' OR 'Overweight*' OR 'Obesity*' OR 'Overnutrition*' OR 'Hypernutrition*'):ab,ti))</p> <p><b>AND</b></p> <p>('attitude'/exp OR 'motivation'/exp OR ('Barrier*' OR 'Facilitator*' OR 'Enabler*' OR 'Driver*' OR 'Motivat*' OR 'Opinion*' OR 'View*' OR 'Attitude*' OR 'Expectation*' OR 'Incentive*' OR 'Disincentive*' OR 'Belief*' OR 'Influencing factor*' OR 'Experience*' OR 'Perspective*' OR 'Perception*' OR 'Hinder*' OR 'Impediment*' OR 'obstacle*'):ab,ti)</p> |
| #2<br>(1021 hits) | #1 <b>AND</b> [1-1-2019]/sd NOT [20-1-2021]/sd                                                                                                                                                                                                                                                                                                                                                                                                                                                                                                                                                                                                                                                                                                                                                                                                                                                                                                                                                                                                                                                                                                                                                                                                                                                                                                                                                                                                                                                                                                                                                                                                                                                                                                                                                                                                                                                                                                                                                                                                                                                                                                                                                                                                                                                                                                                     |

## CINAHL

|                  |                                                                                                                                                                                                                                                                                                                                                                                                                                                                                                                                                                                                                                                                                                                                                                                                                                                                                                                                                                                                                                                                                                                                                                                                                                                                                                                                                                                                                                                                                                                                                                                                                                                                                                                                                                                                                                      |
|------------------|--------------------------------------------------------------------------------------------------------------------------------------------------------------------------------------------------------------------------------------------------------------------------------------------------------------------------------------------------------------------------------------------------------------------------------------------------------------------------------------------------------------------------------------------------------------------------------------------------------------------------------------------------------------------------------------------------------------------------------------------------------------------------------------------------------------------------------------------------------------------------------------------------------------------------------------------------------------------------------------------------------------------------------------------------------------------------------------------------------------------------------------------------------------------------------------------------------------------------------------------------------------------------------------------------------------------------------------------------------------------------------------------------------------------------------------------------------------------------------------------------------------------------------------------------------------------------------------------------------------------------------------------------------------------------------------------------------------------------------------------------------------------------------------------------------------------------------------|
| #1<br>(424 hits) | <p>(MH "Health Personnel+" OR MH "Health Care Delivery+" OR TI(Health personnel* OR Health professional* OR Medical staff* OR Clinician* OR Medical specialist* OR Health care* OR Healthcare* OR Primary care* OR Secondary care* OR Allied health personnel* OR Allied health professional* OR Paramedic* OR Nurse* OR Nursing staff* OR Nurse practit* OR Physician assistant* OR Physicians assistant* OR Nutritionist* OR Dietician* OR Dietitian* OR Physical therapist* OR Physiotherapist* OR Lifestyle coach* OR Lifestyle counselor* OR Physician* OR Orthopedic surgeon* OR Orthopedist* OR General practitioner* OR General practice* OR Psychologist*)) OR AB(Health personnel* OR Health professional* OR Medical staff* OR Clinician* OR Medical specialist* OR Health care* OR Healthcare* OR Primary care* OR Secondary care* OR Allied health personnel* OR Allied health professional* OR Paramedic* OR Nurse* OR Nursing staff* OR Nurse practit* OR Physician assistant* OR Physicians assistant* OR Nutritionist* OR Dietician* OR Dietitian* OR Physical therapist* OR Physiotherapist* OR Lifestyle coach* OR Lifestyle counselor* OR Physician* OR Orthopedic surgeon* OR Orthopedist* OR General practitioner* OR General practice* OR Psychologist*))</p> <p><b>AND</b></p> <p>(MH "Osteoarthritis+" OR TI(Osteoarthritis* OR Osteoarthro* OR Degenerative arthrit*) OR AB(Osteoarthritis* OR Osteoarthro* OR Degenerative arthrit*)) AND (MH "Lower Extremity+" OR MH "Hip Joint+" OR MH "Knee Joint+" OR TI(Hip* OR Cox* OR Acetabulofemoral joint* OR Knee* OR Superior tibulofibular joint* OR Patellofemoral* OR Lower extremit* OR Lower limb*)) OR AB(Hip* OR Cox* OR Acetabulofemoral joint* OR Knee* OR Superior tibulofibular joint* OR Patellofemoral* OR Lower extremit* OR Lower limb*))</p> |
|------------------|--------------------------------------------------------------------------------------------------------------------------------------------------------------------------------------------------------------------------------------------------------------------------------------------------------------------------------------------------------------------------------------------------------------------------------------------------------------------------------------------------------------------------------------------------------------------------------------------------------------------------------------------------------------------------------------------------------------------------------------------------------------------------------------------------------------------------------------------------------------------------------------------------------------------------------------------------------------------------------------------------------------------------------------------------------------------------------------------------------------------------------------------------------------------------------------------------------------------------------------------------------------------------------------------------------------------------------------------------------------------------------------------------------------------------------------------------------------------------------------------------------------------------------------------------------------------------------------------------------------------------------------------------------------------------------------------------------------------------------------------------------------------------------------------------------------------------------------|

|                  |                                                                                                                                                                                                                                                                                                                                                                                                                                                                                                                                                                                                                                                                                                                                                                                                                                                                                                                                                                                                                                                                                                                                                                                                                                                                                                                                                                                                                                                                                                                                                                                                                                                                                                                                                                                                                                                                                                                                                                                                                                                                                                                                                                                                                                                                |
|------------------|----------------------------------------------------------------------------------------------------------------------------------------------------------------------------------------------------------------------------------------------------------------------------------------------------------------------------------------------------------------------------------------------------------------------------------------------------------------------------------------------------------------------------------------------------------------------------------------------------------------------------------------------------------------------------------------------------------------------------------------------------------------------------------------------------------------------------------------------------------------------------------------------------------------------------------------------------------------------------------------------------------------------------------------------------------------------------------------------------------------------------------------------------------------------------------------------------------------------------------------------------------------------------------------------------------------------------------------------------------------------------------------------------------------------------------------------------------------------------------------------------------------------------------------------------------------------------------------------------------------------------------------------------------------------------------------------------------------------------------------------------------------------------------------------------------------------------------------------------------------------------------------------------------------------------------------------------------------------------------------------------------------------------------------------------------------------------------------------------------------------------------------------------------------------------------------------------------------------------------------------------------------|
|                  | <p><b>AND</b><br/>         ((MH "Life Style+" OR MH "Behavior+" OR TI(Life style* OR Lifestyle* OR Behavior* OR Behaviour* OR Habit* OR Risk reduction* OR Early therap* OR Secondary prevention* OR Tertiary prevention* OR Disease prevention*)) OR AB(Life style* OR Lifestyle* OR Behavior* OR Behaviour* OR Habit* OR Risk reduction* OR Early therap* OR Secondary prevention* OR Tertiary prevention* OR Disease prevention*)) OR (MH "Exercise+" OR MH "Therapeutic Exercise+" OR MH "Sports+" OR TI(Physical activit* OR Physical training* OR Physical fitness* OR Physical condition* OR Physical therap* OR Physiotherap* OR Exercis* OR Run* OR Jog* OR Walk* OR Bicycl* OR Swim* OR Strength* OR Resistance* OR Sport* OR Athletic* OR Train* OR Sedentary) OR AB(Physical activit* OR Physical training* OR Physical fitness* OR Physical condition* OR Physical therap* OR Physiotherap* OR Exercis* OR Run* OR Jog* OR Walk* OR Bicycl* OR Swim* OR Strength* OR Resistance* OR Sport* OR Athletic* OR Train* OR Sedentary)) OR (MH "Nutrition+" OR MH "Food+" OR MH "Diet Therapy+" OR MH "Body Weight+" OR TI(Healthy diet* OR Healthy eating* OR Nutrition* OR Diet* OR Food* OR Weight loss* OR Weight loss program* OR Weight reduction* OR Weight reduction program* OR Body weight* OR Overweight* OR Obesity* OR Overnutrition* OR Hypernutrition*)) OR AB(Healthy diet* OR Healthy eating* OR Nutrition* OR Diet* OR Food* OR Weight loss* OR Weight loss program* OR Weight reduction* OR Weight reduction program* OR Body weight* OR Overweight* OR Obesity* OR Overnutrition* OR Hypernutrition*))</p> <p><b>AND</b><br/>         (MH "Attitude+" OR MH "Motivation+" OR TI(Barrier* OR Facilitator* OR Enabler* OR Driver* OR Motivat* OR Opinion* OR View* OR Attitude* OR Expectation* OR Incentive* OR Disincentive* OR Belief* OR Influencing factor* OR Experience* OR Perspective* OR Perception* OR Hinder* OR Impediment* OR Obstacle*) OR AB(Barrier* OR Facilitator* OR Enabler* OR Driver* OR Motivat* OR Opinion* OR View* OR Attitude* OR Expectation* OR Incentive* OR Disincentive* OR Belief* OR Influencing factor* OR Experience* OR Perspective* OR Perception* OR Hinder* OR Impediment* OR Obstacle*))</p> |
| #2<br>(598 hits) | #1                                                                                                                                                                                                                                                                                                                                                                                                                                                                                                                                                                                                                                                                                                                                                                                                                                                                                                                                                                                                                                                                                                                                                                                                                                                                                                                                                                                                                                                                                                                                                                                                                                                                                                                                                                                                                                                                                                                                                                                                                                                                                                                                                                                                                                                             |

PsycINFO

|                 |                                                                                                                                                                                                                                                                                                                                                                                                                                                                                                                                                                                                                                                                                                                                                                                                                                                                                                                                                                                                                                                                                                                                                                                                                                                                                                                                                                                                                                                                                                                                                                                                                                                                                                                                                                                                                                                                                                                                                                                                                                                                                                                                                     |
|-----------------|-----------------------------------------------------------------------------------------------------------------------------------------------------------------------------------------------------------------------------------------------------------------------------------------------------------------------------------------------------------------------------------------------------------------------------------------------------------------------------------------------------------------------------------------------------------------------------------------------------------------------------------------------------------------------------------------------------------------------------------------------------------------------------------------------------------------------------------------------------------------------------------------------------------------------------------------------------------------------------------------------------------------------------------------------------------------------------------------------------------------------------------------------------------------------------------------------------------------------------------------------------------------------------------------------------------------------------------------------------------------------------------------------------------------------------------------------------------------------------------------------------------------------------------------------------------------------------------------------------------------------------------------------------------------------------------------------------------------------------------------------------------------------------------------------------------------------------------------------------------------------------------------------------------------------------------------------------------------------------------------------------------------------------------------------------------------------------------------------------------------------------------------------------|
| #1<br>(49 hits) | <p>(DE "Health Personnel" OR DE "Health Care Delivery" OR DE "Primary Health Care" OR DE "Physical Therapists" OR DE "Nurses" OR DE "Physicians" OR DE "Family Physicians" OR DE "General Practitioners" OR DE "Surgeons" OR DE "Clinical Psychologists" OR DE "Allied Health Personnel" OR DE "Caregivers" OR DE "Medical Personnel" OR DE "Mental Health Personnel" OR DE "Clinicians" OR DE "Therapists" OR DE "Psychologists" OR TI(Health personnel* OR Health professional* OR Medical staff* OR Clinician* OR Medical specialist* OR Health care* OR Healthcare* OR Primary care* OR Secondary care* OR Allied health personnel* OR Allied health professional* OR Paramedic* OR Nurse* OR Nursing staff* OR Nurse practit* OR Physician assistant* OR Physicians assistant* OR Nutritionist* OR Dietician* OR Dietitian* OR Physical therapist* OR Physiotherapist* OR Lifestyle coach* OR Lifestyle counselor* OR Physician* OR Orthopedic surgeon* OR Orthopedist* OR General practitioner* OR General practice* OR Psychologist*) OR AB(Health personnel* OR Health professional* OR Medical staff* OR Clinician* OR Medical specialist* OR Health care* OR Healthcare* OR Primary care* OR Secondary care* OR Allied health personnel* OR Allied health professional* OR Paramedic* OR Nurse* OR Nursing staff* OR Nurse practit* OR Physician assistant* OR Physicians assistant* OR Nutritionist* OR Dietician* OR Dietitian* OR Physical therapist* OR Physiotherapist* OR Lifestyle coach* OR Lifestyle counselor* OR Physician* OR Orthopedic surgeon* OR Orthopedist* OR General practitioner* OR General practice* OR Psychologist*))</p> <p><b>AND</b><br/>         (TI(Osteoarthritis* OR Osteoarthro* OR Degenerative arthrit*) OR AB(Osteoarthritis* OR Osteoarthro* OR Degenerative arthrit*)) AND (DE "Hips" OR DE "Knee" OR TI(Hip* OR Cox* OR Acetabulofemoral joint* OR Knee* OR Superior tibulofibular joint* OR Patellofemoral* OR Lower extremit* OR Lower limb*) OR AB(Hip* OR Cox* OR Acetabulofemoral joint* OR Knee* OR Superior tibulofibular joint* OR Patellofemoral* OR Lower extremit* OR Lower limb*))</p> |
|-----------------|-----------------------------------------------------------------------------------------------------------------------------------------------------------------------------------------------------------------------------------------------------------------------------------------------------------------------------------------------------------------------------------------------------------------------------------------------------------------------------------------------------------------------------------------------------------------------------------------------------------------------------------------------------------------------------------------------------------------------------------------------------------------------------------------------------------------------------------------------------------------------------------------------------------------------------------------------------------------------------------------------------------------------------------------------------------------------------------------------------------------------------------------------------------------------------------------------------------------------------------------------------------------------------------------------------------------------------------------------------------------------------------------------------------------------------------------------------------------------------------------------------------------------------------------------------------------------------------------------------------------------------------------------------------------------------------------------------------------------------------------------------------------------------------------------------------------------------------------------------------------------------------------------------------------------------------------------------------------------------------------------------------------------------------------------------------------------------------------------------------------------------------------------------|

|                 |                                                                                                                                                                                                                                                                                                                                                                                                                                                                                                                                                                                                                                                                                                                                                                                                                                                                                                                                                                                                                                                                                                                                                                                                                                                                                                                                                                                                                                                                                                                                                                                                                                                                                                                                                                                                                                                                                                                                                                                                                                                                                                                                                                                                                                                                                                                                                                                                                                                                                                                                                                                                                                                                                                                                                                                                                                                                                                                              |
|-----------------|------------------------------------------------------------------------------------------------------------------------------------------------------------------------------------------------------------------------------------------------------------------------------------------------------------------------------------------------------------------------------------------------------------------------------------------------------------------------------------------------------------------------------------------------------------------------------------------------------------------------------------------------------------------------------------------------------------------------------------------------------------------------------------------------------------------------------------------------------------------------------------------------------------------------------------------------------------------------------------------------------------------------------------------------------------------------------------------------------------------------------------------------------------------------------------------------------------------------------------------------------------------------------------------------------------------------------------------------------------------------------------------------------------------------------------------------------------------------------------------------------------------------------------------------------------------------------------------------------------------------------------------------------------------------------------------------------------------------------------------------------------------------------------------------------------------------------------------------------------------------------------------------------------------------------------------------------------------------------------------------------------------------------------------------------------------------------------------------------------------------------------------------------------------------------------------------------------------------------------------------------------------------------------------------------------------------------------------------------------------------------------------------------------------------------------------------------------------------------------------------------------------------------------------------------------------------------------------------------------------------------------------------------------------------------------------------------------------------------------------------------------------------------------------------------------------------------------------------------------------------------------------------------------------------------|
|                 | <p>limb*))</p> <p><b>AND</b></p> <p>((DE "Lifestyle" OR DE "Behavior" OR DE "Active Living" OR DE "Lifestyle Changes" OR DE "Activity Level" OR DE "Habits" OR DE "Behavior Change" OR DE "Readiness to Change" OR DE "Stages of Change" OR DE "Illness Behavior" OR DE "Health Behavior" OR DE "Health Attitudes" OR TI(Life style* OR Lifestyle* OR Behavior* OR Behaviour* OR Habit* OR Risk reduction* OR Early therap* OR Secondary prevention* OR Tertiary prevention* OR Disease prevention*) OR AB(Life style* OR Lifestyle* OR Behavior* OR Behaviour* OR Habit* OR Risk reduction* OR Early therap* OR Secondary prevention* OR Tertiary prevention* OR Disease prevention*)) OR (DE "Exercise" OR DE "Movement Therapy" OR DE "Sports" OR DE "Aerobic Exercise" OR DE "Physical Activity" OR DE "Physical Fitness" OR DE "Rehabilitation" OR DE "Physical Therapy" OR DE "Sedentary Behavior" OR TI(Physical activit* OR Physical training* OR Physical fitness* OR Physical condition* OR Physical therap* OR Physiotherap* OR Exercis* OR Run* OR Jog* OR Walk* OR Bicycl* OR Swim* OR Strength* OR Resistance* OR Sport* OR Athletic* OR Train* OR Sedentary) OR AB(Physical activit* OR Physical training* OR Physical fitness* OR Physical condition* OR Physical therap* OR Physiotherap* OR Exercis* OR Run* OR Jog* OR Walk* OR Bicycl* OR Swim* OR Strength* OR Resistance* OR Sport* OR Athletic* OR Train* OR Sedentary)) OR (DE "Nutrition" OR DE "Food" OR DE "Diets" OR DE "Body Weight" OR DE "Weight Control" OR DE "Calories" OR DE "Body Mass Index" OR DE "Overweight" OR DE "Weight Loss" OR DE "Obesity" OR TI(Healthy diet* OR Healthy eating* OR Nutrition* OR Diet* OR Food* OR Weight loss* OR Weight loss program* OR Weight reduction* OR Weight reduction program* OR Body weight* OR Overweight* OR Obesity* OR Overnutrition* OR Hypernutrition*) OR AB(Healthy diet* OR Healthy eating* OR Nutrition* OR Diet* OR Food* OR Weight loss* OR Weight loss program* OR Weight reduction* OR Weight reduction program* OR Body weight* OR Overweight* OR Obesity* OR Overnutrition* OR Hypernutrition*))</p> <p><b>AND</b></p> <p>(DE "Attitudes" OR DE "Motivation" OR DE "Health Personnel Attitudes" OR DE "Therapist Attitudes" OR DE "Psychologist Attitudes" OR DE "Extrinsic Motivation" OR DE "Intrinsic Motivation" OR TI(Barrier* OR Facilitator* OR Enabler* OR Driver* OR Motivat* OR Opinion* OR View* OR Attitude* OR Expectation* OR Incentive* OR Disincentive* OR Belief* OR Influencing factor* OR Experience* OR Perspective* OR Perception* OR Hinder* OR Impediment* OR Obstacle*) OR AB(Barrier* OR Facilitator* OR Enabler* OR Driver* OR Motivat* OR Opinion* OR View* OR Attitude* OR Expectation* OR Incentive* OR Disincentive* OR Belief* OR Influencing factor* OR Experience* OR Perspective* OR Perception* OR Hinder* OR Impediment* OR Obstacle*))</p> |
| #2<br>(14 hits) | #1 AND RD 20190101-                                                                                                                                                                                                                                                                                                                                                                                                                                                                                                                                                                                                                                                                                                                                                                                                                                                                                                                                                                                                                                                                                                                                                                                                                                                                                                                                                                                                                                                                                                                                                                                                                                                                                                                                                                                                                                                                                                                                                                                                                                                                                                                                                                                                                                                                                                                                                                                                                                                                                                                                                                                                                                                                                                                                                                                                                                                                                                          |

### The Cochrane Library

|                  |                                                                                                                                                                                                                                                                                                                                                                                                                                                                                                                                                                                                                                                                                                                                                                                                                                                                                                                                                                                                                       |
|------------------|-----------------------------------------------------------------------------------------------------------------------------------------------------------------------------------------------------------------------------------------------------------------------------------------------------------------------------------------------------------------------------------------------------------------------------------------------------------------------------------------------------------------------------------------------------------------------------------------------------------------------------------------------------------------------------------------------------------------------------------------------------------------------------------------------------------------------------------------------------------------------------------------------------------------------------------------------------------------------------------------------------------------------|
| #1<br>(299 hits) | <p>((Health personnel* OR Health professional* OR Medical staff* OR Clinician* OR Medical specialist* OR Health care* OR Healthcare* OR Primary care* OR Secondary care* OR Allied health personnel* OR Allied health professional* OR Paramedic* OR Nurse* OR Nursing staff* OR Nurse practit* OR Physician assistant* OR Physicians assistant* OR Nutritionist* OR Dietician* OR Dietitian* OR Physical therapist* OR Physiotherapist* OR Lifestyle coach* OR Lifestyle counselor* OR Physician* OR Orthopedic surgeon* OR Orthopedist* OR General practitioner* OR General practice* OR Psychologist*))</p> <p><b>AND</b></p> <p>(Osteoarthritis* OR Osteoarthro* OR Degenerative arthritis*) AND (Hip* OR Cox* OR Acetabulofemoral joint* OR Knee* OR Superior tibulofibular joint* OR Patellofemoral* OR Lower extremity* OR Lower limb*)</p> <p><b>AND</b></p> <p>((Life style* OR Lifestyle* OR Behavior* OR Behaviour* OR Habit* OR Risk reduction* OR Early therap* OR Secondary prevention* OR Tertiary</p> |
|------------------|-----------------------------------------------------------------------------------------------------------------------------------------------------------------------------------------------------------------------------------------------------------------------------------------------------------------------------------------------------------------------------------------------------------------------------------------------------------------------------------------------------------------------------------------------------------------------------------------------------------------------------------------------------------------------------------------------------------------------------------------------------------------------------------------------------------------------------------------------------------------------------------------------------------------------------------------------------------------------------------------------------------------------|

1  
2  
3  
4  
5  
6  
7  
8  
9  
10  
11  
12  
13  
14  
15  
16  
17  
18  
19  
20  
21  
22  
23  
24  
25  
26  
27  
28  
29  
30  
31  
32  
33  
34  
35  
36  
37  
38  
39  
40  
41  
42  
43  
44  
45  
46

|                  |                                                                                                                                                                                                                                                                                                                                                                                                                                                                                                                                                                                                                                                                                                                                                                                                                                                            |
|------------------|------------------------------------------------------------------------------------------------------------------------------------------------------------------------------------------------------------------------------------------------------------------------------------------------------------------------------------------------------------------------------------------------------------------------------------------------------------------------------------------------------------------------------------------------------------------------------------------------------------------------------------------------------------------------------------------------------------------------------------------------------------------------------------------------------------------------------------------------------------|
|                  | <pre>prevention* OR Disease prevention*) OR (Physical activit* OR Physical training* OR Physical fitness* OR Physical condition* OR Physical therap* OR Physiotherap* OR Exercis* OR Run* OR Jog* OR Walk* OR Bicycl* OR Swim* OR Strength* OR Resistance* OR Sport* OR Athletic* OR Train* OR Sedentary) OR (Healthy diet* OR Healthy eating* OR Nutrition* OR Diet* OR Food* OR Weight loss* OR Weight loss program* OR Weight reduction* OR Weight reduction program* OR Body weight* OR Overweight* OR Obesity* OR Overnutrition* OR Hypernutrition*)) <b>AND</b> (Barrier* OR Facilitator* OR Enabler* OR Driver* OR Motivat* OR Opinion* OR View* OR Attitude* OR Expectation* OR Incentive* OR Disincentive* OR Belief* OR Influencing factor* OR Experience* OR Perspective* OR Perception* OR Hinder* OR Impediment* OR Obstacle*);ti,ab,kw</pre> |
| #2<br>(632 hits) | #1                                                                                                                                                                                                                                                                                                                                                                                                                                                                                                                                                                                                                                                                                                                                                                                                                                                         |

For peer review only

**Supplemental File 2.** Quality assessment of the included studies based on the Mixed Methods Appraisal Tool<sup>a</sup>

| Reference <sup>b</sup>          | Screening questions <sup>c</sup> |    | 1. Qualitative <sup>d</sup> |     |     |     |     | 4. Quantitative descriptive <sup>e</sup> |     |     |     |     | 5. Mixed-methods <sup>f</sup> |     |     |     |     |
|---------------------------------|----------------------------------|----|-----------------------------|-----|-----|-----|-----|------------------------------------------|-----|-----|-----|-----|-------------------------------|-----|-----|-----|-----|
|                                 | S1                               | S2 | 1.1                         | 1.2 | 1.3 | 1.4 | 1.5 | 4.1                                      | 4.2 | 4.3 | 4.4 | 4.5 | 5.1                           | 5.2 | 5.3 | 5.4 | 5.5 |
| Allison (2019) [27]             | +                                | +  | +                           | +   | ?   | +   | +   |                                          |     |     |     |     |                               |     |     |     |     |
| Bossen (2016) [28] <sup>g</sup> | +                                | +  | ?                           | +   | ?   | -   | ?   |                                          |     |     |     |     |                               |     |     |     |     |
| Christiansen (2020) [29]        | +                                | +  | ?                           | +   | ?   | +   | +   |                                          |     |     |     |     |                               |     |     |     |     |
| Davis (2018) [30]               | +                                | +  | ?                           | +   | ?   | -   | ?   |                                          |     |     |     |     |                               |     |     |     |     |
| De Rooij (2014) [31]            | +                                | +  | ?                           | +   | ?   | -   | ?   |                                          |     |     |     |     |                               |     |     |     |     |
| Egerton (2017) [32]             | +                                | +  | ?                           | +   | ?   | +   | +   |                                          |     |     |     |     |                               |     |     |     |     |
| Egerton (2018) [33]             | +                                | +  | ?                           | +   | ?   | +   | +   |                                          |     |     |     |     |                               |     |     |     |     |
| Hinman (2016) [34]              | +                                | +  | +                           | +   | +   | +   | +   |                                          |     |     |     |     |                               |     |     |     |     |
| Hinman (2017) [35]              | +                                | +  | ?                           | +   | ?   | +   | +   |                                          |     |     |     |     |                               |     |     |     |     |
| Knoop (2020) [36]               | +                                | +  | ?                           | +   | ?   | -   | ?   |                                          |     |     |     |     |                               |     |     |     |     |
| Law (2019) [37]                 | +                                | +  | ?                           | +   | ?   | +   | +   |                                          |     |     |     |     |                               |     |     |     |     |
| Lawford (2019) [38]             | +                                | +  | ?                           | +   | ?   | +   | +   |                                          |     |     |     |     |                               |     |     |     |     |
| Lawford (2020) [39]             | +                                | +  | ?                           | +   | ?   | +   | +   |                                          |     |     |     |     |                               |     |     |     |     |
| Lawford (2021) [40]             | +                                | +  | ?                           | +   | ?   | +   | +   |                                          |     |     |     |     |                               |     |     |     |     |
| MacKay (2018) [41]              | +                                | +  | ?                           | +   | ?   | +   | +   |                                          |     |     |     |     |                               |     |     |     |     |
| MacKay (2020) [42]              | +                                | +  | ?                           | +   | ?   | +   | +   |                                          |     |     |     |     |                               |     |     |     |     |
| Mann (2011) [43]                | +                                | +  | ?                           | +   | ?   | +   | +   |                                          |     |     |     |     |                               |     |     |     |     |
| Miller (2020) [44]              | +                                | +  | ?                           | +   | ?   | -   | +   |                                          |     |     |     |     |                               |     |     |     |     |
| Nielsen (2014) [45]             | +                                | +  | ?                           | +   | ?   | +   | +   |                                          |     |     |     |     |                               |     |     |     |     |
| Okwera (2019) [46]              | +                                | +  | ?                           | +   | ?   | +   | +   |                                          |     |     |     |     |                               |     |     |     |     |
| Poitras (2010) [47]             | +                                | +  | ?                           | +   | ?   | -   | +   |                                          |     |     |     |     |                               |     |     |     |     |
| Rosemann (2006) [48]            | +                                | +  | ?                           | +   | ?   | -   | ?   |                                          |     |     |     |     |                               |     |     |     |     |
| Selten (2017) [49]              | +                                | +  | ?                           | +   | ?   | +   | +   |                                          |     |     |     |     |                               |     |     |     |     |
| Tang (2020) [50]                | +                                | +  | ?                           | +   | ?   | +   | +   |                                          |     |     |     |     |                               |     |     |     |     |
| Teo (2020) [51]                 | +                                | +  | ?                           | +   | ?   | +   | +   |                                          |     |     |     |     |                               |     |     |     |     |
| Wallis (2020) [52]              | +                                | +  | ?                           | +   | ?   | +   | +   |                                          |     |     |     |     |                               |     |     |     |     |
| Cottrell (2016) [53]            | +                                | +  |                             |     |     |     |     | +                                        | +   | +   | -   | +   |                               |     |     |     |     |
| Duarte (2019) [54]              | +                                | +  |                             |     |     |     |     | +                                        | ?   | +   | +   | ?   |                               |     |     |     |     |
| Hill (2018) [55]                | +                                | +  |                             |     |     |     |     | +                                        | ?   | +   | -   | +   |                               |     |     |     |     |
| Hill (2018) [56]                | +                                | +  |                             |     |     |     |     | -                                        | ?   | +   | ?   | +   |                               |     |     |     |     |
| Hofstede (2016) [57]            | +                                | +  |                             |     |     |     |     | +                                        | ?   | +   | -   | +   |                               |     |     |     |     |
| Lawford (2018) [58]             | +                                | +  |                             |     |     |     |     | +                                        | ?   | +   | ?   | +   |                               |     |     |     |     |

1  
2  
3  
4  
5  
6  
7  
8  
9  
10  
11  
12  
13  
14  
15  
16  
17  
18  
19  
20  
21  
22  
23  
24  
25  
26  
27  
28  
29  
30  
31  
32  
33  
34  
35  
36  
37  
38  
39  
40  
41  
42  
43  
44  
45  
46

|                      |   |   |   |   |   |   |   |   |   |   |   |   |   |   |   |   |   |
|----------------------|---|---|---|---|---|---|---|---|---|---|---|---|---|---|---|---|---|
| Reid (2014) [59]     | + | + |   |   |   |   |   | + | ? | + | - | + |   |   |   |   |   |
| De Rooij (2020) [60] | + | + | ? | + | ? | - | ? | + | ? | + | + | + | ? | + | ? | + | - |
| Holden (2009) [61]   | + | + | ? | + | ? | + | + | + | ? | + | - | + | + | + | + | + | - |
| Kloek (2020) [62]    | + | + | ? | + | ? | + | + | + | ? | + | - | + | + | + | ? | - | - |

<sup>a</sup> + = yes; - = no, ? = can't tell

<sup>b</sup> The numbers in brackets ('[...]') correspond to the reference numbers used in the main text of the manuscript.

<sup>c</sup> S1 = Are there clear research questions?; S2 = Do the collected data allow to address the research questions?

<sup>d</sup> 1.1 = Is the qualitative approach appropriate to answer the research question?; 1.2 = Are the qualitative data collection methods adequate to address the research question?; 1.3 = Are the findings adequately derived from the data?; 1.4 = Is the interpretation of results sufficiently substantiated by data?; 1.5 = Is there coherence between qualitative data sources, collection, analysis and interpretation?

<sup>e</sup> 4.1 = Is the sampling strategy relevant to address the research question?; 4.2 = Is the sample representative of the target population?; 4.3 = Are the measurements appropriate?; 4.4 = Is the risk of nonresponse bias low?; 4.5 = Is the statistical analysis appropriate to answer the research question?

<sup>f</sup> 5.1 = Is there an adequate rationale for using a mixed methods design to address the research question?; 5.2 = Are the different components of the study effectively integrated to answer the research question?; 5.3 = Are the outputs of the integration of qualitative and quantitative components adequately interpreted?; 5.4 = Are divergences and inconsistencies between quantitative and qualitative results adequately addressed?; 5.5 = Do the different components of the study adhere to the quality criteria of each tradition of the methods involved?

<sup>g</sup> The MMAT was only applied to the section regarding the pilot study on the feasibility of the blended intervention.

### Supplemental File 3. Full overview of all extracted factors per domain

#### Explanation

- In the tables below, all extracted factors per subcategory of each domain are presented. The colors of the subcategories correspond to barriers (red), facilitators (green) or unclear factors (orange).
- Column “Description”: (\*) at the end of the description indicates that the factor is derived from a close-ended question or attitude statement.
- Column “Reference”: the numbers in brackets (‘[...]’) correspond to the reference numbers used in the main text of the manuscript.
- Abbreviations: ACSM: American College of Sports Medicine; BMI: body mass index; CBT: cognitive behavioral therapy; CKP: chronic knee pain; CPG: clinical practice guideline; GP: general practitioner; HCP: healthcare professional; LI: lifestyle intervention; LMP: Lifestyle Management Programme; NSAID: non-steroidal anti-inflammatory drug; NWBE: non-weight bearing quadriceps strengthening exercise; OA: osteoarthritis; PCST: pain coping skills training; PT: physiotherapist; RCT: randomized controlled trial; TKA: total knee arthroplasty; TJA: total joint arthroplasty; WBE: weight bearing functional exercise.

#### Domain 1: Intervention factors

##### *Effectiveness*

| Description                                                                                                          | Reference                |
|----------------------------------------------------------------------------------------------------------------------|--------------------------|
| LI's have little or no effect on OA (barrier)                                                                        |                          |
| Not certain that exercise works                                                                                      | Christiansen (2020) [29] |
| Advice to exercise and lose weight does not work                                                                     | Egerton (2017) [32]      |
| Dubious about effect of exercise and weight-management advice on reducing symptoms                                   | Egerton (2018) [33]      |
| Surgical methods have the best outcomes                                                                              | Miller (2020) [44]       |
| Lack of confidence in clinical effectiveness of physiotherapy treatments                                             | Okwera (2019) [46]       |
| Limited impact of weight loss on established knee OA (more effective as a primary prevention strategy)               | Poitras (2010) [47]      |
| Questioning direct relationship between weight and knee OA (numerous other factors associated)                       | Poitras (2010) [47]      |
| Less certain about effectiveness of physical therapy (benefits variable or difficult to prove)                       | Selten (2017) [49]       |
| Increasing the overall activity levels does not/might not stop the knee problem getting worse (*)                    | Cottrell (2016) [53]     |
| There is a paucity of evidence in regards to the effectiveness of physiotherapy treatment for OA hip and/or knee (*) | Reid (2014) [59]         |
| Past experience has shown physiotherapy to be ineffective (*)                                                        | Reid (2014) [59]         |
| Increasing overall activity levels does not/might not stop the knee problem getting worse (*)                        | Holden (2009) [61]       |
| Increasing the strength of the muscles around the knee does not/might not stop the knee problem getting worse (*)    | Holden (2009) [61]       |
| Knee problems are not/might not be improved by general exercise (*)                                                  | Holden (2009) [61]       |
| Potential effects of LIs are difficult to accomplish (barrier)                                                       |                          |
| Weight loss is difficult (multiplicity of factors need to be addressed, often involving change in lifestyle)         | Poitras (2010) [47]      |



|    |                                                                                                            |                      |
|----|------------------------------------------------------------------------------------------------------------|----------------------|
| 1  |                                                                                                            |                      |
| 2  |                                                                                                            |                      |
| 3  | Vicious circle (pain when exercising, people move less/eat more due to frustration/sometimes depression)   | Rosemann (2006) [48] |
| 4  | Achieving patient behavior change is difficult (*)                                                         | Cottrell (2016) [53] |
| 5  | Human nature (as patient-centered barrier to adherence)                                                    | Holden (2009) [61]   |
| 6  | LIs have positive effects on affected joint(s) (facilitator)                                               |                      |
| 7  | Functional improvements experienced by patients                                                            | Hinman (2017) [35]   |
| 8  | Improvements in patient pain and function                                                                  | Lawford (2019) [38]  |
| 9  | Large improvements in knee pain                                                                            | Lawford (2021) [40]  |
| 10 | Treatment could improve clients' symptoms (e.g. reduce pain, increase function)                            | MacKay (2018) [41]   |
| 11 | Treatment could potentially slow progression of symptoms                                                   | MacKay (2018) [41]   |
| 12 | Improve people's symptoms early in treatment (to gain buy-in)                                              | MacKay (2020) [42]   |
| 13 | Benefits of activity on knee mobility                                                                      | Poitras (2010) [47]  |
| 14 | Activity necessary for the knee's health                                                                   | Poitras (2010) [47]  |
| 15 | Weight loss improves pain and joint function                                                               | Poitras (2010) [47]  |
| 16 | Benefits of weight reduction for relieving symptoms of knee/hip OA                                         | Selten (2017) [49]   |
| 17 | Beneficial effects of physical therapy in reducing pain/stiffness and potential effects on cartilage       | Selten (2017) [49]   |
| 18 | Exercise therapy may be effective by giving more muscular support for joints                               | Wallis (2020) [52]   |
| 19 | Knee problems are improved by quadriceps strengthening exercises (*)                                       | Cottrell (2016) [53] |
| 20 | Knee problems are improved by general exercise (e.g. walking or swimming) (*)                              | Cottrell (2016) [53] |
| 21 | Increasing the strength of the muscles around the knee stops the knee problem getting worse (*)            | Cottrell (2016) [53] |
| 22 | Exercise is beneficial for OA (*)                                                                          | Lawford (2018) [58]  |
| 23 | Knee problems are improved by local strengthening exercises (*)                                            | Holden (2009) [61]   |
| 24 | LIs have positive effects on general health (facilitator)                                                  |                      |
| 25 | Lifestyle treatments benefited other chronic conditions                                                    | Egerton (2018) [33]  |
| 26 | Rapid weight loss was primary driver of motivation                                                         | Lawford (2021) [40]  |
| 27 | Benefits of activity on general wellbeing                                                                  | Poitras (2010) [47]  |
| 28 | Weight loss effective at improving mobility in general                                                     | Poitras (2010) [47]  |
| 29 | Weight loss also benefits mobility in general                                                              | Poitras (2010) [47]  |
| 30 | Beneficial effects of physical therapy in reducing weight and for increasing mobility/posture/coordination | Selten (2017) [49]   |
| 31 | Community interventions are effective at achieving sufficient and sustained weight loss (*)                | Hill (2018) [56]     |
| 32 | Patients benefit from weight loss (*)                                                                      | Hofstede (2016) [57] |
| 33 | LIs have positive mental effects (facilitator)                                                             |                      |
| 34 | Enthusiastic about the program and described the results (e.g. it was empowering)                          | Davis (2018) [30]    |
| 35 | Greater confidence to exercise among patients                                                              | Hinman (2017) [35]   |
| 36 | Reminding patients of opportunity to self-manage                                                           | Law (2019) [37]      |
| 37 | Increased confidence to self-manage                                                                        | Lawford (2019) [38]  |
| 38 | Positive lifestyle changes (patients) (e.g. thinking differently)                                          | Lawford (2021) [40]  |
| 39 | Physical therapy useful in increasing patients self-management in coping with/acceptance of symptoms       | Selten (2017) [49]   |
| 40 |                                                                                                            |                      |
| 41 |                                                                                                            |                      |
| 42 |                                                                                                            |                      |
| 43 |                                                                                                            |                      |
| 44 |                                                                                                            |                      |
| 45 |                                                                                                            |                      |
| 46 |                                                                                                            |                      |

|                                                                                                          |                      |
|----------------------------------------------------------------------------------------------------------|----------------------|
| Exercise therapy may be effective by giving opportunity to improve confidence about activities/mobility  | Wallis (2020) [52]   |
| Non-surgical treatments motivate patients to do things themselves (*)                                    | Hofstede (2016) [57] |
| LIs have positive effects (not further specified) (facilitator)                                          |                      |
| Positive impact on patients of personalized attention from coach and from advice/education they provided | Hinman (2016) [34]   |
| Emphasising health benefits of programme                                                                 | Law (2019) [37]      |
| Physical therapy helpful for patients most of the time                                                   | Miller (2020) [44]   |
| Value of lifestyle advice related to knee and hip OA                                                     | Selten (2017) [49]   |
| Non-pharmacological, non-surgical treatment was considered useful to delay surgery                       | Selten (2017) [49]   |
| Positive about program (alternative approach and opportunity to avoid a joint replacement)               | Wallis (2020) [52]   |
| Improvement in the physical condition of participants                                                    | Duarte (2019) [54]   |
| Good results of physical therapy (*)                                                                     | Hofstede (2016) [57] |

### Safety

| Description                                                                                                           | Reference            |
|-----------------------------------------------------------------------------------------------------------------------|----------------------|
| LIs are unsafe or have negative effects (barrier)                                                                     |                      |
| Being apprehensive about aggravating pain in patients                                                                 | Lawford (2020) [39]  |
| Tending to avoid pushing patients in usual clinical practice                                                          | Lawford (2020) [39]  |
| Potential further damage to the knee due to activity                                                                  | Poitras (2010) [47]  |
| Urging caution to patients about participating in higher impact exercise/activities                                   | Wallis (2020) [52]   |
| Fear of increasing symptoms (as barrier to prescribing exercise)                                                      | Holden (2009) [61]   |
| Causing disease progression, particularly through weight-bearing activities (as barrier to prescribing exercise)      | Holden (2009) [61]   |
| Exacerbating patient's comorbidities (as barrier to prescribing exercise)                                             | Holden (2009) [61]   |
| General exercise is not/might not be safe for everybody to do (*)                                                     | Holden (2009) [61]   |
| Local strengthening exercises for the knee are not/might not be safe for everybody to do (*)                          | Holden (2009) [61]   |
| LIs are safe (facilitator)                                                                                            |                      |
| Quadriceps strengthening exercises for the knee are safe for everybody to do (*)                                      | Cottrell (2016) [53] |
| General exercise (e.g. walking or swimming) is safe for everybody to do (*)                                           | Cottrell (2016) [53] |
| Only few drawbacks for the use of non-surgical treatments (*)                                                         | Hofstede (2016) [57] |
| Research environment or protocols provide a safety net (facilitator)                                                  |                      |
| Less afraid to increase training intensity (preventing adverse events by tailoring programs to individual's capacity) | De Rooij (2014) [31] |
| Safety net provided by research environment (e.g. patients were previously screened for comorbidities/red flags)      | Hinman (2017) [35]   |
| There was a safety net in place with the trial (each patient had been screened)                                       | Lawford (2019) [38]  |
| Experiences in study helped them push patients through more pain than they would have previously                      | Lawford (2020) [39]  |

### Design

| Description                                                                                                       | Reference            |
|-------------------------------------------------------------------------------------------------------------------|----------------------|
| <b>Non-optimal content or structure of LIs (barrier)</b>                                                          |                      |
| Structure/timing of exercise program restricted capacity to modify exercises/provide adequate follow-up           | Hinman (2016) [34]   |
| Maximum number of four sessions was considered too low in many patients                                           | Knoop (2020) [36]    |
| Behavioral approach in exercise therapy and advice to visit GP were considered unnecessary for most patients      | Knoop (2020) [36]    |
| Program factors (e.g. single discipline led intervention)                                                         | Wallis (2020) [52]   |
| Services do not meet expectations (*)                                                                             | Cottrell (2016) [53] |
| E-Exercise does not/might not contain all essential elements for the treatment of hip/knee OA (*)                 | Kloek (2020) [62]    |
| The content of e-Exercise is not/might not be aligned with my opinion about treating patients with OA (*)         | Kloek (2020) [62]    |
| The intervention provided through e-Exercise is not/might not be appropriate for the average patient with OA (*)  | Kloek (2020) [62]    |
| Patients who were treated with e-Exercise were (perhaps) not generally positive about the intervention (*)        | Kloek (2020) [62]    |
| <b>Challenges for patients during participation in LIs (barrier)</b>                                              |                      |
| Mental effort required for WBE program was challenging for patients                                               | Lawford (2020) [39]  |
| Physical challenge was the complexity of WBE program                                                              | Lawford (2020) [39]  |
| Straight leg raise challenging in NWBE program                                                                    | Lawford (2020) [39]  |
| Volume of resources could be overwhelming/confusing for some patients                                             | Lawford (2021) [40]  |
| Difficulty for patients with PCST component (cognitive restructuring techniques)                                  | Nielsen (2014) [45]  |
| <b>Challenges for HCPs during delivery of LIs (barrier)</b>                                                       |                      |
| e-Exercise must be adapted for suitable integration into practice (e.g. no insight into modules patients receive) | Bossen (2016) [28]   |
| Class required intense supervision, which was difficult to provide when most participants were new                | Davis (2018) [30]    |
| Challenges of supervision when space did not allow clear line of sight                                            | Davis (2018) [30]    |
| Challenges associated with cuff weights used to apply resistance in NWBE program                                  | Lawford (2020) [39]  |
| The lay out of the protocol does not/might not facilitate its usage in daily practice (*)                         | De Rooij (2020) [60] |
| Clarity of instruction manual and course (lack of)                                                                | Kloek (2020) [62]    |
| <b>Positive experiences with or suggestions for improving the content or structure of LIs (facilitator)</b>       |                      |
| Positive feedback regarding the content of e-Exercise                                                             | Bossen (2016) [28]   |
| First education session was critical to reducing the participant's anxiety related to exercising                  | Davis (2018) [30]    |
| Importance of empowering the patients rather than 'pushing' them, achieved by 'giving choices'                    | Davis (2018) [30]    |
| Positive comments about the exercise regimen                                                                      | Hinman (2016) [34]   |
| Structure provided by protocol/structure of exercises (how patients included them into daily routine)             | Hinman (2016) [34]   |
| Multidisciplinary nature of LMP (whole-person, intensive and functional approach)                                 | Law (2019) [37]      |
| Standardization was viewed as important for monitoring and evaluation purposes                                    | Law (2019) [37]      |
| Helpful social impact of group-based programme                                                                    | Law (2019) [37]      |
| Long-term follow-up consultations would be beneficial                                                             | Lawford (2021) [40]  |
| Extremely positive about educational resources provided                                                           | Lawford (2021) [40]  |
| More information about healthy eating beyond meal replacement phase could be included                             | Lawford (2021) [40]  |
| Exercise/physical activity program was an important part of intervention                                          | Lawford (2021) [40]  |

|    |                                                                                                                                                   |                      |
|----|---------------------------------------------------------------------------------------------------------------------------------------------------|----------------------|
| 1  | Favorably comments on program content (positive way to help people be proactive about their pain)                                                 | Nielsen (2014) [45]  |
| 2  | Importance of PCST component (cognitive restructuring techniques)                                                                                 | Nielsen (2014) [45]  |
| 3  | Structure of PCST sessions (overview/practice review/covering new skill/practice planning) worked well                                            | Nielsen (2014) [45]  |
| 4  | A more holistic program as part of a multidisciplinary model of service was preferred                                                             | Wallis (2020) [52]   |
| 5  | Value of program's structure and peer (group) support                                                                                             | Wallis (2020) [52]   |
| 6  | Name of program ('Good Life with OsteoArthritis') implied optimism and positive outcome                                                           | Wallis (2020) [52]   |
| 7  | Received positive feedback from their patients about program                                                                                      | Wallis (2020) [52]   |
| 8  | Some contents of the protocol are not/might not be incorrect (*)                                                                                  | De Rooij (2020) [60] |
| 9  | The protocol is applicable to OA patients with comorbidity that I see in my clinical practice (*)                                                 | De Rooij (2020) [60] |
| 10 | Important to extend the intake phase to at least to 45 min                                                                                        | De Rooij (2020) [60] |
| 11 | Completeness of web-based application (exercises/assignments/information)                                                                         | Kloek (2020) [62]    |
| 12 | Perception that e-Exercise is an appropriate treatment option for subgroup of OA patients                                                         | Kloek (2020) [62]    |
| 13 | <b>Ease for patients during participation in LIs (facilitator)</b>                                                                                |                      |
| 14 | NWBE program was generally easier for patients to follow (mental effort)                                                                          | Lawford (2020) [39]  |
| 15 | Simplicity and convenience of meal replacements                                                                                                   | Lawford (2021) [40]  |
| 16 | Providing trial of sessions to assist patients to get started (suggestion for promotion and referrals)                                            | Wallis (2020) [52]   |
| 17 | <b>Ease for HCPs during delivery of LIs (facilitator)</b>                                                                                         |                      |
| 18 | Initial classes needed to be small with rolling recruitment very beneficial                                                                       | Davis (2018) [30]    |
| 19 | List of restrictions for exercise therapy was conveniently arranged checklist for diagnostic and treatment phases                                 | De Rooij (2014) [31] |
| 20 | Suggestion to increase feasibility by reducing the protocols to three main protocols                                                              | De Rooij (2014) [31] |
| 21 | Requirements of treatment protocol freed therapists to notice and reflect on impact of the interventions                                          | Hinman (2016) [34]   |
| 22 | Structured protocol allowed to experience different OA treatment regimen/observe and learn from impact                                            | Hinman (2016) [34]   |
| 23 | NWBE program was easier to prescribe (mental effort)                                                                                              | Lawford (2020) [39]  |
| 24 | Easier to prescribe and progress NWBE than WBE program (physical complexity)                                                                      | Lawford (2020) [39]  |
| 25 | Training workshop as good introduction to content and process of delivering PCST program                                                          | Nielsen (2014) [45]  |
| 26 | Weekly group interaction crucial to being able to deliver intervention effectively/problem-solve issues                                           | Nielsen (2014) [45]  |
| 27 | Input from supervising psychologist crucial to being able to deliver intervention effectively/problem-solve issues                                | Nielsen (2014) [45]  |
| 28 | Would have liked more role-playing experience prior to beginning trial treatments                                                                 | Nielsen (2014) [45]  |
| 29 | Regular group meetings were considered very important (if not essential) for delivery of PCST program                                             | Nielsen (2014) [45]  |
| 30 | Value of having a psychologist involved throughout the program, their professional input was helpful                                              | Nielsen (2014) [45]  |
| 31 | The recommendations over adapting the diagnostic phase (history taking and physical examination) in the protocol are clear and understandable (*) | De Rooij (2020) [60] |
| 32 | The recommendations over adapting the OA exercise therapy in the protocol are clear and understandable (*)                                        | De Rooij (2020) [60] |
| 33 | Useful to plan follow up/refreshment training to repeat/discuss content of course/protocol and application                                        | De Rooij (2020) [60] |
| 34 | Shortening the protocol would increase user-friendliness                                                                                          | De Rooij (2020) [60] |
| 35 | The instruction course and manual assisted me so that I knew how to work with e-Exercise (*)                                                      | Kloek (2020) [62]    |

### Personalized treatment

| Description                                                                                                                     | Reference            |
|---------------------------------------------------------------------------------------------------------------------------------|----------------------|
| <b>Insufficient ability to provide personalized treatment within LIs (barrier)</b>                                              |                      |
| Concerned the service would not be able to provide individualized management for a very diverse population                      | Egerton (2017) [32]  |
| Requirements of RCT potentially created a barrier to responding to where the client was                                         | Nielsen (2014) [45]  |
| Less satisfied about the applicability of e-Exercise for only one diagnosis                                                     | Kloek (2020) [62]    |
| I do not/might not have enough influence on the content of patients' individual e-Exercise program (*)                          | Kloek (2020) [62]    |
| <b>Ability and importance of providing personalized treatment within LIs (facilitator)</b>                                      |                      |
| Flexibility was valuable when tackling local participation challenges                                                           | Law (2019) [37]      |
| Tailoring exercise programs to individual patient would overcome some challenges                                                | Lawford (2020) [39]  |
| Tailoring treatment to a person's goals/interests                                                                               | MacKay (2020) [42]   |
| Need to consider personal context by integrating people's home exercises into daily activities/other life demands               | MacKay (2020) [42]   |
| Some modules worked better than others (depending on the individual patient and context)                                        | Nielsen (2014) [45]  |
| The belief that a more flexible approach responsive to patient needs was required in their practice                             | Nielsen (2014) [45]  |
| Exercise programs have to be individualized to each patient by the PT                                                           | Poitras (2010) [47]  |
| Importance of tailored exercise program                                                                                         | Teo (2020) [51]      |
| Exercise for CKP is most beneficial when it is tailored to meet individual patient needs (*)                                    | Cottrell (2016) [53] |
| A standard set of exercises is not/might not be sufficient for every patient with chronic knee problems (*)                     | Cottrell (2016) [53] |
| The protocol gives the opportunity to make your own decisions regarding history taking, physical examination, and treatment (*) | De Rooij (2020) [60] |
| A standard set of exercises is not/might not be sufficient for every patient with knee OA (*)                                   | Holden (2009) [61]   |
| Exercise for knee OA is most beneficial when it is tailored to meet individual patient needs (*)                                | Holden (2009) [61]   |
| More flexibility in web-based application (intervention duration, number of sets/repetitions, type of exercises)                | Kloek (2020) [62]    |
| More flexibility in intervention (more possibilities to personalize to individual needs)                                        | Kloek (2020) [62]    |

### Accessibility

| Description                                                                                                 | Reference            |
|-------------------------------------------------------------------------------------------------------------|----------------------|
| <b>LIs are unavailable or inaccessible (barrier)</b>                                                        |                      |
| Most of the patients did not meet study inclusion criteria                                                  | Bossen (2016) [28]   |
| Lack of availability of support services (e.g. community-based rehabilitation programs) in remote locations | Egerton (2018) [33]  |
| Long waiting lists for support services (e.g. community-based rehabilitation programs)                      | Egerton (2018) [33]  |
| Lack of infrastructure or local programmes (particularly in rural settings)                                 | MacKay (2018) [41]   |
| Clients often had a waiting period before accessing care                                                    | MacKay (2018) [41]   |
| Lack of facilities to promote continuing exercise in community                                              | Mann (2011) [43]     |
| Wait for physiotherapy was too long                                                                         | Mann (2011) [43]     |
| Inaccessible treatment options within organization                                                          | Miller (2020) [44]   |
| Limitations to accessing services (e.g. lack of facilities, costs) (*)                                      | Cottrell (2016) [53] |

|    |                                                                                                                 |                      |
|----|-----------------------------------------------------------------------------------------------------------------|----------------------|
| 1  | Weight management services are not/might not be adequately commissioned in my area (*)                          | Hill (2018) [56]     |
| 2  | Lack of availability of physiotherapy                                                                           | Reid (2014) [59]     |
| 3  | Poor links to community facilities such as local leisure centres                                                | Holden (2009) [61]   |
| 4  | Costs of LIs to patients (barrier)                                                                              |                      |
| 5  | Concern that uptake would be negatively impacted if patients were required to pay                               | Egerton (2017) [32]  |
| 6  | Concerns regarding financial cost to patients when considering referral to other services                       | Egerton (2018) [33]  |
| 7  | Cost was a factor in whether clients could access facilities/programmes                                         | MacKay (2018) [41]   |
| 8  | Costs to patients (lack of insurance coverage/high co-pays for specific services/time off work/travel expenses) | Miller (2020) [44]   |
| 9  | Costs (extrinsic barrier for patient adherence)                                                                 | Teo (2020) [51]      |
| 10 | Cost (program access barrier)                                                                                   | Wallis (2020) [52]   |
| 11 | LIs are not feasible or sustainable (barrier)                                                                   |                      |
| 12 | Concern for overcomplicated system when service is not compatible/complementary with existing initiatives       | Egerton (2017) [32]  |
| 13 | Not seeing need (already adequate skills/resources to support OA patient self-management and lifestyle change)  | Egerton (2017) [32]  |
| 14 | Not seeing need (advice already given at their practice would be unhelpfully repeated)                          | Egerton (2017) [32]  |
| 15 | Concern regarding long-term service sustainability                                                              | Egerton (2017) [32]  |
| 16 | The addition of a care support team may add complexities to management                                          | Egerton (2017) [32]  |
| 17 | In my daily clinical practice I can (perhaps) not integrate working according to the protocol well (*)          | De Rooij (2020) [60] |
| 18 | I do not/might not treat enough patients with knee OA and comorbidity to apply the protocol (*)                 | De Rooij (2020) [60] |
| 19 | The protocol does not/might not fit well with my working methods of daily clinical practice (*)                 | De Rooij (2020) [60] |
| 20 | Total amount of knee OA patients with comorbidity was lower than expected                                       | De Rooij (2020) [60] |
| 21 | Inconvenience to patients when accessing LIs (barrier)                                                          |                      |
| 22 | Weather (extrinsic barrier for patient adherence)                                                               | Teo (2020) [51]      |
| 23 | Transport, waiting time and parking related to attendance (program access barrier)                              | Wallis (2020) [52]   |
| 24 | Geography (program access barrier)                                                                              | Wallis (2020) [52]   |
| 25 | Available session times (program access barrier)                                                                | Wallis (2020) [52]   |
| 26 | Geographical problems (e.g. remote location, scared to walk in local area) (*)                                  | Cottrell (2016) [53] |
| 27 | LIs are available or accessible, or suggestions for improvement (facilitator)                                   |                      |
| 28 | More likely to engage with the care support team if it enabled more affordable/accessible allied health         | Egerton (2017) [32]  |
| 29 | LMP would benefit from extension of inclusion criteria (patients with less severe OA and lower BMI)             | Law (2019) [37]      |
| 30 | Benefits of having infrastructure and programmes available in their communities                                 | MacKay (2018) [41]   |
| 31 | Triage service (as suggestion for physiotherapy service improvement)                                            | Okwera (2019) [46]   |
| 32 | A web-based physiotherapy service (as suggestion for physiotherapy service improvement)                         | Okwera (2019) [46]   |
| 33 | Reduced waiting times (as suggestion for physiotherapy service improvement)                                     | Okwera (2019) [46]   |
| 34 | Availability of non-surgical treatments (*)                                                                     | Hofstede (2016) [57] |
| 35 | Good access to physiotherapy in area (*)                                                                        | Reid (2014) [59]     |
| 36 | LIs are feasible or sustainable (facilitator)                                                                   |                      |
| 37 | Need for clarity about how the new service would integrate with existing schemes and payment structures         | Egerton (2017) [32]  |
| 38 |                                                                                                                 |                      |
| 39 |                                                                                                                 |                      |
| 40 |                                                                                                                 |                      |
| 41 |                                                                                                                 |                      |
| 42 |                                                                                                                 |                      |
| 43 |                                                                                                                 |                      |
| 44 |                                                                                                                 |                      |
| 45 |                                                                                                                 |                      |
| 46 |                                                                                                                 |                      |

|                                                                                                                                                       |                      |
|-------------------------------------------------------------------------------------------------------------------------------------------------------|----------------------|
| Seeing need (advice/recommendations may need to be reinforced/provided over several health care episodes)                                             | Egerton (2017) [32]  |
| Seeing need (extra time and encouragement for the patient would result in better outcomes)                                                            | Egerton (2017) [32]  |
| Importance of broad acceptance (patients/doctors/health service funders) if new service is to continue long term                                      | Egerton (2017) [32]  |
| Model of stratified care easy to apply and having added value for daily practice                                                                      | Knoop (2020) [36]    |
| Appreciation of applicability of treatment protocols                                                                                                  | Knoop (2020) [36]    |
| Further and ongoing evaluation of the LMP would help to address current challenges                                                                    | Law (2019) [37]      |
| Interventions in physical therapists' toolbox were not static (changed over time)                                                                     | MacKay (2020) [42]   |
| The protocol is feasible in daily clinical practice (*)                                                                                               | De Rooij (2020) [60] |
| In my daily clinical practice, I work with sufficient equipment (including blood pressure meter, saturation meter) to properly apply the protocol (*) | De Rooij (2020) [60] |
| I have changed my working method (due to the protocol) (*)                                                                                            | De Rooij (2020) [60] |
| Intake procedure is feasible and implementable                                                                                                        | De Rooij (2020) [60] |
| The more you apply the strategy in daily practice, the easier it is to integrate it in your daily working method                                      | De Rooij (2020) [60] |
| <b>Convenience for patients when accessing LIs (facilitator)</b>                                                                                      |                      |
| Close, convenient locations (suggestion for promotion and referrals)                                                                                  | Wallis (2020) [52]   |
| Appropriate session times for working populations (suggestion for promotion and referrals)                                                            | Wallis (2020) [52]   |
| Provision of free parking at health service (suggestion for promotion and referrals)                                                                  | Wallis (2020) [52]   |

### Telehealth

| Description                                                                                                                     | Reference           |
|---------------------------------------------------------------------------------------------------------------------------------|---------------------|
| <b>Disadvantages of telehealth in terms of effectiveness (barrier)</b>                                                          |                     |
| Remote (telephone) delivery is not as good as face-to-face particularly in relation to exercise advice                          | Egerton (2017) [32] |
| Inability of a remote service to provide locally relevant information                                                           | Egerton (2017) [32] |
| An exercise program prescribed by a PT over the telephone would not/might not improve a patient's OA (*)                        | Lawford (2018) [58] |
| I do not/might not experience that e-Exercise supports patients in doing their exercises at home (*)                            | Kloek (2020) [62]   |
| <b>Telehealth is not safe for patients or patient/data privacy (barrier)</b>                                                    |                     |
| Concerns about security of patient data and information confidentiality during the referral process                             | Egerton (2017) [32] |
| Using the telephone would not/might not be a safe way for patients to receive a PT-prescribed exercise program for their OA (*) | Lawford (2018) [58] |
| <b>Challenges for HCPs regarding lack of physical/visual contact (barrier)</b>                                                  |                     |
| Forced to modify usual habits/rely more on information shared by patients (instead of own physical assessment)                  | Hinman (2017) [35]  |
| Some discomfort without hands-on assessment (no palpation of patient's knee/hands-on facilitation of exercises)                 | Hinman (2017) [35]  |
| Assessment of patients could be difficult when consulting via telephone (inability to observe)                                  | Lawford (2019) [38] |
| Lack of visual/physical contact would limit strategies available when teaching patients an exercise program                     | Lawford (2019) [38] |
| I would not/might not be able to adequately monitor a patient's OA over the telephone (*)                                       | Lawford (2018) [58] |
| I do not/might not like that there would be no physical contact with an OA patient when consulting over the telephone (*)       | Lawford (2018) [58] |
| I do not/might not like that there would be no physical contact with an OA patient when consulting over the internet video (*)  | Lawford (2018) [58] |
| Reduced face-to-face contact interfered with professional autonomy                                                              | Kloek (2020) [62]   |

|                                                                                                                                                            |                     |
|------------------------------------------------------------------------------------------------------------------------------------------------------------|---------------------|
| <b>Other challenges for HCPs regarding feasibility of telehealth (barrier)</b>                                                                             |                     |
| Lack of financial incentive if blended intervention substitutes conventional visits (reduced venues per patient)                                           | Bossen (2016) [28]  |
| Hesitancy to embrace an unfamiliar new service                                                                                                             | Egerton (2017) [32] |
| Patient flexibility could come at a cost to the therapist sometimes (allowed patients to reschedule last minute)                                           | Hinman (2017) [35]  |
| Skype consultations more suitable as adjunctive to usual in-clinic care (initial assessment in person preferred)                                           | Hinman (2017) [35]  |
| Telephone not viewed as primary mode of providing care (only for follow-up)                                                                                | Lawford (2019) [38] |
| Some difficulty scheduling telephone consultations during usual day of face-to-face consultations                                                          | Lawford (2019) [38] |
| Using the telephone to consult with an OA patient and prescribe an exercise program would not/might not be easy for me (*)                                 | Lawford (2018) [58] |
| I would not/might not be as satisfied talking to an OA patient over the telephone as I would be talking to the patient in person in my consulting room (*) | Lawford (2018) [58] |
| I would not/might not be interested in being involved in a service offering PT-prescribed exercise over the telephone for my people with OA (*)            | Lawford (2018) [58] |
| Using the telephone would not/might not be an acceptable way for me to deliver an exercise program to patients with OA (*)                                 | Lawford (2018) [58] |
| Using the telephone would not/might not be a useful (practical) way for me to deliver an exercise program to patients with OA (*)                          | Lawford (2018) [58] |
| Using the telephone would not/might not be an effective way for me to deliver an exercise program to patients with OA (*)                                  | Lawford (2018) [58] |
| Technical skills (lack of)                                                                                                                                 | Kloek (2020) [62]   |
| Adaptive capacity to change treatment routines (lack of)                                                                                                   | Kloek (2020) [62]   |
| Absence of national e-Health guideline or standard                                                                                                         | Kloek (2020) [62]   |
| Loss of income due to substitution of face-to-face session                                                                                                 | Kloek (2020) [62]   |
| <b>Patient-related challenges regarding feasibility of telehealth (barrier)</b>                                                                            |                     |
| Most of the patients prefer traditional face-to-face treatments                                                                                            | Bossen (2016) [28]  |
| Hearing and cognitive difficulties as barriers for some patients to being able to interact with the service                                                | Egerton (2017) [32] |
| Skepticism about whether many patients would embrace such a model (i.e. because of remote-delivery aspect)                                                 | Egerton (2017) [32] |
| Lack of technology affinity (reason for patients' non-willingness to participate in e-Exercise)                                                            | Kloek (2020) [62]   |
| Patients preferred regular face-to-face contact                                                                                                            | Kloek (2020) [62]   |
| <b>Negative aspects regarding communication and relationship using telehealth (barrier)</b>                                                                |                     |
| Lack of face-to-face contact difficult/hindered ability to establish normal rapport/build effective relationships                                          | Hinman (2016) [34]  |
| Occasional technical difficulties (e.g. poor internet connection) could disrupt the flow of the consultation                                               | Hinman (2017) [35]  |
| Relationships with patients might be adversely impacted/could be difficult to develop rapport                                                              | Lawford (2019) [38] |
| Difficulties communicating might be experienced when consulting via telephone                                                                              | Lawford (2019) [38] |
| Video consultations made it more difficult to have emotional conversations/read non-verbal cues                                                            | Lawford (2021) [40] |
| <b>Benefits of telehealth in terms of effectiveness (facilitator)</b>                                                                                      |                     |
| Possibility to extend physical therapy treatment in patient's home environment                                                                             | Bossen (2016) [28]  |
| Potential to enhance the adherence of home exercises                                                                                                       | Bossen (2016) [28]  |
| Empowering effect of home environment on patient adherence with exercise program                                                                           | Hinman (2017) [35]  |
| Using Skype distilled focus to most important and effective treatment elements to facilitate self-management                                               | Hinman (2017) [35]  |
| Patients more relaxed in home environment/more receptive to the information the therapists provided                                                        | Hinman (2017) [35]  |
| Patients could be more comfortable talking about condition/engaging in exercise program from own home                                                      | Lawford (2019) [38] |



|    |                                                                                                                                                   |                     |
|----|---------------------------------------------------------------------------------------------------------------------------------------------------|---------------------|
| 1  | Telephone-delivered care could provide increased opportunities to educate patients about OA                                                       | Lawford (2019) [38] |
| 2  | Patient adherence to telephone-delivered exercise program was high                                                                                | Lawford (2019) [38] |
| 3  | An exercise program prescribed by a PT over the internet video would improve a patient's OA (*)                                                   | Lawford (2018) [58] |
| 4  | Added value in terms of exercise adherence (important factor to use web-based application)                                                        | Kloek (2020) [62]   |
| 5  | Telehealth is safe for patients or patient/data privacy (facilitator)                                                                             |                     |
| 6  | Home environment facilitated correct and safe exercise techniques                                                                                 | Hinman (2017) [35]  |
| 7  | A patient's privacy would not be violated if I prescribed them an exercise program over the telephone (*)                                         | Lawford (2018) [58] |
| 8  | A patient's privacy would not be violated if I prescribed them an exercise program over the internet video (*)                                    | Lawford (2018) [58] |
| 9  | Using the internet video would be a safe way for patients to receive a PT-prescribed exercise program for their OA (*)                            | Lawford (2018) [58] |
| 10 | I believe that patient data gathered at the e-Exercise web-application is stored safely (*)                                                       | Kloek (2020) [62]   |
| 11 | Lack of physical/visual contact not a major issue for HCPs (facilitator)                                                                          |                     |
| 12 | Patients responded favorably to the exercises prescribed despite lack of hands-on assessment                                                      | Hinman (2017) [35]  |
| 13 | Hands-off approach was physically less demanding compared to usual care/contributed to sense of satisfaction                                      | Hinman (2017) [35]  |
| 14 | Functional improvements were observable using Skype                                                                                               | Hinman (2017) [35]  |
| 15 | Lack of physical and visual contact less of an issue than anticipated                                                                             | Lawford (2019) [38] |
| 16 | Able to work around the lack of visual contact (erring on the side of caution)                                                                    | Lawford (2019) [38] |
| 17 | I would get a good understanding of a patient's OA over the telephone (*)                                                                         | Lawford (2018) [58] |
| 18 | I would get a good understanding of a patient's OA over the internet video (*)                                                                    | Lawford (2018) [58] |
| 19 | I would be able to adequately monitor a patient's OA over the internet video (*)                                                                  | Lawford (2018) [58] |
| 20 | Positive attitude or needs of HCPs regarding feasibility of telehealth (facilitator)                                                              |                     |
| 21 | Ease of using Skype for consultations                                                                                                             | Hinman (2017) [35]  |
| 22 | Quality of technology suitable for providing instructions/prescribing exercises/receiving instantaneous feedback                                  | Hinman (2017) [35]  |
| 23 | More effective communication skills would be needed to consult via telephone                                                                      | Lawford (2019) [38] |
| 24 | It would be necessary to provide patients with pictures or videos of each exercise when consulting via telephone                                  | Lawford (2019) [38] |
| 25 | Experiences providing telephone-delivered care exceeded expectations, resulting in new enthusiasm                                                 | Lawford (2019) [38] |
| 26 | Written materials provided to patients helped to prescribe exercises effectively                                                                  | Lawford (2019) [38] |
| 27 | Training in communication and/or health coaching important to effectively deliver care over telephone                                             | Lawford (2019) [38] |
| 28 | Video consultations were easy and convenient                                                                                                      | Lawford (2021) [40] |
| 29 | Using the internet video to consult with an OA patient and prescribe an exercise program would be easy for me (*)                                 | Lawford (2018) [58] |
| 30 | I would be as satisfied talking to an OA patient over the internet video as I would be talking to the patient in person in my consulting room (*) | Lawford (2018) [58] |
| 31 | I would be interested in being involved in a service offering PT-prescribed exercise over the internet video for my people with OA (*)            | Lawford (2018) [58] |
| 32 | Using the internet video would be an acceptable way for me to deliver an exercise program to patients with OA (*)                                 | Lawford (2018) [58] |
| 33 | Using the internet video would be a useful (practical) way for me to deliver an exercise program to patients with OA (*)                          | Lawford (2018) [58] |
| 34 | Using the internet video would be an effective way for me to deliver an exercise program to patients with OA (*)                                  | Lawford (2018) [58] |
| 35 | Advantage of reducing number of treatments                                                                                                        | Kloek (2020) [62]   |
| 36 | Offering an innovative intervention attracted new patients                                                                                        | Kloek (2020) [62]   |
| 37 | That it results in less income is not/might not be a major disadvantage of e-Exercise (*)                                                         | Kloek (2020) [62]   |
| 38 |                                                                                                                                                   |                     |
| 39 |                                                                                                                                                   |                     |
| 40 |                                                                                                                                                   |                     |
| 41 |                                                                                                                                                   |                     |
| 42 |                                                                                                                                                   |                     |
| 43 |                                                                                                                                                   |                     |
| 44 |                                                                                                                                                   |                     |
| 45 |                                                                                                                                                   |                     |
| 46 |                                                                                                                                                   |                     |

|                                                                                                                                 |                     |
|---------------------------------------------------------------------------------------------------------------------------------|---------------------|
| Our physiotherapy practice has the intention to use e-Health innovations (*)                                                    | Kloek (2020) [62]   |
| <b>Patient-related benefits regarding feasibility of telehealth (facilitator)</b>                                               |                     |
| 24/7 availability of information and exercises                                                                                  | Bossen (2016) [28]  |
| Service could increase access to support for rural patients                                                                     | Egerton (2017) [32] |
| Skype-delivered care convenient for patients (time efficiency/flexibility/access)                                               | Hinman (2017) [35]  |
| Telephone-delivered care would be convenient for patients                                                                       | Lawford (2019) [38] |
| Telephone-delivered care could reduce patient costs associated with accessing physiotherapy services                            | Lawford (2019) [38] |
| Telephone-delivered care could allow wider variety of patients to access physiotherapy                                          | Lawford (2019) [38] |
| Noticeable shift in patients' expectations of physiotherapy care (more willing to self-manage their condition)                  | Lawford (2019) [38] |
| Telephone-delivered care was convenient for patients                                                                            | Lawford (2019) [38] |
| An exercise program prescribed by a PT over the telephone would save a patient money (*)                                        | Lawford (2018) [58] |
| An exercise program prescribed by a PT over the internet video would save a patient money (*)                                   | Lawford (2018) [58] |
| Receiving an exercise program from a PT over the telephone would be a convenient form of health care for an OA patient (*)      | Lawford (2018) [58] |
| Receiving an exercise program from a PT over the internet video would be a convenient form of health care for an OA patient (*) | Lawford (2018) [58] |
| Receiving an exercise program from a PT over the telephone would save the patient time (*)                                      | Lawford (2018) [58] |
| Receiving an exercise program from a PT over the internet video would save the patient time (*)                                 | Lawford (2018) [58] |
| Using the telephone would be an affordable way for patients to receive a PT-prescribed exercise program for their OA (*)        | Lawford (2018) [58] |
| Using the internet video would be an affordable way for patients to receive a PT-prescribed exercise program for their OA (*)   | Lawford (2018) [58] |
| <b>Positive aspects regarding communication and relationship using telehealth (facilitator)</b>                                 |                     |
| Developed a strong rapport with patients over the telephone                                                                     | Lawford (2019) [38] |
| Consulting via telephone forced to focus on effective conversations with patients (more personal level)                         | Lawford (2019) [38] |
| Pleasantly surprised by experience with video consultations (had some of the best conversations)                                | Lawford (2021) [40] |

## Domain 2: Individual HCP factors

### Expertise

| Description                                                                                     | Reference                |
|-------------------------------------------------------------------------------------------------|--------------------------|
| <b>Lack of knowledge or skills around LIs or promoting behavioral change (barrier)</b>          |                          |
| Lack of knowledge around appropriate interventions for weight loss                              | Allison (2019) [27]      |
| Uncertainty about how to enact their understanding of relationship between weight and knee OA   | Allison (2019) [27]      |
| Limited knowledge of exercise prescription (uncertainty of what exercise to recommend/how much) | Christiansen (2020) [29] |
| Not received sufficient training on exercise/lack of education                                  | Christiansen (2020) [29] |
| Knowledge of exercise and weight-loss treatments is sometimes inaccurate or inadequate          | Egerton (2018) [33]      |
| Reduced confidence with providing suitable exercise and weight loss advice                      | Egerton (2018) [33]      |
| Lack of skills in promoting readiness and motivation for lifestyle treatments                   | Egerton (2018) [33]      |
| Variability in confidence to provide weight management (not confident)                          | MacKay (2018) [41]       |

|    |                                                                                                                                                  |                      |
|----|--------------------------------------------------------------------------------------------------------------------------------------------------|----------------------|
| 1  | Not confident in knowledge about weight management                                                                                               | MacKay (2020) [42]   |
| 2  | Concerns about capacity to learn/not having skills to fulfill study expectations/deal with challenging patients                                  | Nielsen (2014) [45]  |
| 3  | Not have sufficient skills to present PCST component (cognitive restructuring techniques) effectively                                            | Nielsen (2014) [45]  |
| 4  | Some process skills were dissimilar to pre-existing clinical communication skills and challenging to use                                         | Nielsen (2014) [45]  |
| 5  | Lack of knowledge about CBT (necessary to participate in training/RCT to fully appreciate value of CBT to practice)                              | Nielsen (2014) [45]  |
| 6  | Unclear on amount and type of activity necessary to obtain benefits without further damaging the knee                                            | Poitras (2010) [47]  |
| 7  | Uncertainties about dosage/frequency/type of physical activity                                                                                   | Selten (2017) [49]   |
| 8  | Unaware about practice guidelines in relation to aerobic exercise prescription/weight loss/pain management                                       | Tang (2020) [50]     |
| 9  | Knowledge about BMI/weight management was particularly poor (e.g. relying on visual estimations)                                                 | Tang (2020) [50]     |
| 10 | Limited knowledge of how to address weight management                                                                                            | Tang (2020) [50]     |
| 11 | Less awareness about aerobic exercise prescription                                                                                               | Tang (2020) [50]     |
| 12 | Reduced confidence with recommending individual weight/pain management plans (discuss in general terms)                                          | Tang (2020) [50]     |
| 13 | Lack of confidence/knowledge/skills in implementing evidence into practice (e.g. weight management)                                              | Teo (2020) [51]      |
| 14 | I don't have/might not have the required knowledge and training around obesity care (*)                                                          | Hill (2018) [56]     |
| 15 | I do not/might not have sufficient knowledge about knee OA exercise therapy and comorbidity to apply the protocol in daily clinical practice (*) | De Rooij (2020) [60] |
| 16 | Gaps in knowledge/skills (including how to facilitate behavior change, particularly with less motivated patients)                                | Holden (2009) [61]   |
| 17 | Lack of knowledge or skills around OA care in general (barrier)                                                                                  |                      |
| 18 | General lack of expertise/interest in OA (that could lead to inappropriate referral/suboptimal access to services)                               | Mann (2011) [43]     |
| 19 | Lack of physician education on OA care                                                                                                           | Miller (2020) [44]   |
| 20 | Only two GPs had clear understanding of clinical guidelines on OA                                                                                | Okwera (2019) [46]   |
| 21 | No knowledge about treatment                                                                                                                     | Rosemann (2006) [48] |
| 22 | Lack of knowledge or skills around specific resources (barrier)                                                                                  |                      |
| 23 | The issue is not a lack of suitable patient resources but awareness of them                                                                      | Egerton (2018) [33]  |
| 24 | Inability to discuss specific details of ACSM guideline                                                                                          | Tang (2020) [50]     |
| 25 | I do not/might not have sufficient skills to apply the protocol in daily clinical practice (*)                                                   | De Rooij (2020) [60] |
| 26 | I do not/might not read the protocol sufficiently to remember any of its contents (*)                                                            | De Rooij (2020) [60] |
| 27 | Having or improving knowledge or skills around LIs or promoting behavioral change (facilitator)                                                  |                      |
| 28 | Importance of having highly effective communication skills                                                                                       | Egerton (2018) [33]  |
| 29 | Value of monitoring/encouraging patients to develop own understanding of links between exercise/pain                                             | Hinman (2016) [34]   |
| 30 | Confident in capabilities/skills to use strategies they believed to be effective within scope of practice                                        | MacKay (2018) [41]   |
| 31 | Variability in confidence to provide weight management (confident)                                                                               | MacKay (2018) [41]   |
| 32 | Clinical experience helped to read the person's situation (identify approach to motivate them)                                                   | MacKay (2020) [42]   |
| 33 | Postgraduate continuing professional development courses to expand toolkit of therapeutic interventions                                          | MacKay (2020) [42]   |
| 34 | Confidence in addressing weight management                                                                                                       | MacKay (2020) [42]   |
| 35 | Opportunity to review PCST skills and learn more structured/deliberate ways of incorporating these into practice                                 | Nielsen (2014) [45]  |
| 36 | Increasing confidence in using PCST skills over the course of the study                                                                          | Nielsen (2014) [45]  |
| 37 | Improved interpersonal skills with general clinical patients as a result of participating in the study                                           | Nielsen (2014) [45]  |
| 38 |                                                                                                                                                  |                      |
| 39 |                                                                                                                                                  |                      |
| 40 |                                                                                                                                                  |                      |
| 41 |                                                                                                                                                  |                      |
| 42 |                                                                                                                                                  |                      |
| 43 |                                                                                                                                                  |                      |
| 44 |                                                                                                                                                  |                      |
| 45 |                                                                                                                                                  |                      |
| 46 |                                                                                                                                                  |                      |

|                                                                                                                           |                      |
|---------------------------------------------------------------------------------------------------------------------------|----------------------|
| Reasonable understanding of role physiotherapy plays in management of lower-limb OA                                       | Okwera (2019) [46]   |
| Knowledge/confidence in providing treatments related to strengthening and range of motion                                 | Tang (2020) [50]     |
| Confident in providing justifications for non-routinely adhering to guidelines (range of motion exercises)                | Tang (2020) [50]     |
| Being able to describe how they will manage pain during strengthening exercise                                            | Tang (2020) [50]     |
| Having or improving knowledge or skills around OA care in general (facilitator)                                           |                      |
| Need for tailored GP education to improve confidence                                                                      | Egerton (2018) [33]  |
| Importance of provider knowledge regarding OA management                                                                  | Miller (2020) [44]   |
| Physician education on OA management can affect both provider and patient attitudes                                       | Miller (2020) [44]   |
| Training sessions (as suggestion for physiotherapy service improvement)                                                   | Okwera (2019) [46]   |
| Knowledge about treatment                                                                                                 | Rosemann (2006) [48] |
| Available resources might improve knowledge and decision-making (facilitator)                                             |                      |
| Protocols offered guidance in setting up treatment/making clinical decisions/adapting treatment to comorbidity            | De Rooij (2014) [31] |
| List of restrictions was helpful in process of clinical decision making                                                   | De Rooij (2014) [31] |
| Being aware about ACSM guidelines                                                                                         | Tang (2020) [50]     |
| The protocol supports me in clinical reasoning (*)                                                                        | De Rooij (2020) [60] |
| The protocol is supporting the improvement of my knowledge regarding knee OA exercise therapy and comorbidity (*)         | De Rooij (2020) [60] |
| The protocol is supportive in which comorbidity-related symptoms I need to monitor before, during and after treatment (*) | De Rooij (2020) [60] |
| More insight into exercise tolerance/more background knowledge to make clinical decision by using strategy                | De Rooij (2020) [60] |
| Clinical experience (unclear factor)                                                                                      |                      |
| Driven by their professional experience of what does and doesn't work/trial and error                                     | MacKay (2020) [42]   |
| Treatments were based more on what works clinically (opposed to scientific evidence)                                      | MacKay (2020) [42]   |

### *Attitude*

| Description                                                                                          | Reference                |
|------------------------------------------------------------------------------------------------------|--------------------------|
| Negative attitude toward LIs (barrier)                                                               |                          |
| Assigning low priority to exercise as treatment                                                      | Christiansen (2020) [29] |
| GP does not prioritise exercise (*)                                                                  | Cottrell (2016) [53]     |
| It is not/might not be important that people with knee OA increase their overall activity levels (*) | Holden (2009) [61]       |
| Negative attitude toward guidelines or protocols (barrier)                                           |                          |
| Frustrations about lack of autonomy with decision-making                                             | Okwera (2019) [46]       |
| Negativity toward guidelines (clinical reasoning more important)                                     | Okwera (2019) [46]       |
| Positive attitude toward LIs (facilitator)                                                           |                          |
| Acknowledging that weight loss (when someone is overweight) is important                             | Egerton (2018) [33]      |
| Identifying weight management as important                                                           | MacKay (2018) [41]       |
| Perception that exercise and physical activity were central to management                            | MacKay (2020) [42]       |
| Acknowledging that weight management was a component of management                                   | MacKay (2020) [42]       |

|    |                                                                                                                                                                                     |                      |
|----|-------------------------------------------------------------------------------------------------------------------------------------------------------------------------------------|----------------------|
| 1  | Expecting to utilize/continue integrating PCST in general clinical work as physical therapist (beyond the study)                                                                    | Nielsen (2014) [45]  |
| 2  | There is place for each (self-management programs/physiotherapy/orthopedic consultants) in OA management                                                                            | Okwera (2019) [46]   |
| 3  | Many interventions should be used before resorting to medication (including physiotherapy)                                                                                          | Poitras (2010) [47]  |
| 4  | Other interventions (including physiotherapy) should be used before paracetamol                                                                                                     | Poitras (2010) [47]  |
| 5  | NSAIDs alone are not sufficient to appropriately treat inflammation and have to be combined with physiotherapy                                                                      | Poitras (2010) [47]  |
| 6  | Patients should be encouraged to resume/maintain daily activities                                                                                                                   | Poitras (2010) [47]  |
| 7  | Knowing the importance of weight management for knee OA                                                                                                                             | Tang (2020) [50]     |
| 8  | Aware that being overweight/obese is risk factor for knee OA/losing weight is important                                                                                             | Teo (2020) [51]      |
| 9  | Physiotherapy (referral) needs to be prioritised                                                                                                                                    | Cottrell (2016) [53] |
| 10 | It is important that people with CKP increase their overall activity levels (*)                                                                                                     | Cottrell (2016) [53] |
| 11 | Exercise for CKP should (perhaps) preferably be used before drug treatment has been tried (*)                                                                                       | Cottrell (2016) [53] |
| 12 | Weight loss should be the first-line treatment in the management of obese patients with symptomatic knee OA (*)                                                                     | Hill (2018) [55]     |
| 13 | Obese patients with symptomatic knee OA should be referred to a specialist weight management service before orthopaedic assessment (*)                                              | Hill (2018) [55]     |
| 14 | Weight loss should be the first-line treatment in the management of symptomatic knee OA in obesity (*)                                                                              | Hill (2018) [56]     |
| 15 | Support for creation of regional centres where orthopaedic surgeons and bariatric surgeons, with their respective teams, could assess obese patients with symptomatic knee pain (*) | Hill (2018) [56]     |
| 16 | Important to try non-surgical treatments first (*)                                                                                                                                  | Hofstede (2016) [57] |
| 17 | Important to delay a surgery as long as possible (*)                                                                                                                                | Hofstede (2016) [57] |
| 18 | Conservative treatment is (perhaps) an important part of OA management (*)                                                                                                          | Reid (2014) [59]     |
| 19 | Positive attitude toward guidelines or protocols (facilitator)                                                                                                                      |                      |
| 20 | Perceived professional responsibility to adhere to evidence-based guideline                                                                                                         | Allison (2019) [27]  |
| 21 | Important to follow guidelines (*)                                                                                                                                                  | Hofstede (2016) [57] |
| 22 | In general, I do not/might not feel resistance towards working according to protocols (*)                                                                                           | De Rooij (2020) [60] |
| 23 | Autonomy (unclear factor)                                                                                                                                                           |                      |
| 24 | Autonomy affects referral considerations                                                                                                                                            | Law (2019) [37]      |

### Role

| Description                                                                                                        | Reference                |
|--------------------------------------------------------------------------------------------------------------------|--------------------------|
| Perception of own role potentially impeding prescription or follow-up of LIs (barrier)                             |                          |
| Referring patients to other health care providers and for other treatments rather than recommending exercise       | Christiansen (2020) [29] |
| Referring patients to those with specialized knowledge rather than treating themselves (outside scope of practice) | Christiansen (2020) [29] |
| Paternalistic approach to care (low level of engagement in providing exercise and weight management advice)        | Egerton (2018) [33]      |
| Lack of confidence/uncertainty related to role in weight management                                                | MacKay (2020) [42]       |
| Perception that discussions related to diet were not part of their scope of practice                               | MacKay (2020) [42]       |
| Changing own practice style remained as barrier after OA training                                                  | Miller (2020) [44]       |
| Most GPs believed their contribution was essentially limited to diagnosis of condition and medication              | Poitras (2010) [47]      |

|    |                                                                                                                                          |                      |
|----|------------------------------------------------------------------------------------------------------------------------------------------|----------------------|
| 1  | Not focusing on increasing patients' motivation for behavioural change, but just giving general recommendations                          | Rosemann (2006) [48] |
| 2  | Mentioning benefits of weight reduction, but not actively coaching or referring patients                                                 | Selten (2017) [49]   |
| 3  | Not perceiving weight reduction advice as their responsibility                                                                           | Selten (2017) [49]   |
| 4  | Uncertainty over scope of practice/questioning whether weight and pain management fall outside scope                                     | Tang (2020) [50]     |
| 5  | Describing own role as prepping patients for knee surgery when they were referred for physiotherapy                                      | Teo (2020) [51]      |
| 6  | Advice about how to lose weight was limited to brief general advice                                                                      | Teo (2020) [51]      |
| 7  | Considering weight loss to be outside own scope of practice (role of a dietician)                                                        | Teo (2020) [51]      |
| 8  | Comfortable suggesting surgery to patients who responded poorly to conservative management                                               | Teo (2020) [51]      |
| 9  | GPs should (perhaps) not follow-up patients to monitor extent of continuation of exercises (*)                                           | Cottrell (2016) [53] |
| 10 | It is the patient's own responsibility to continue doing their exercise programme (*)                                                    | Cottrell (2016) [53] |
| 11 | Not (or perhaps not) interested in being the orthopedic surgeon in an ortho-bariatric centre (*)                                         | Hill (2018) [55]     |
| 12 | Therapist's role seen as assessment/exercise prescription/education (relatively short-term responsibilities)                             | Holden (2009) [61]   |
| 13 | Patient's role to follow prescribed exercise program over long term/get on board with treatment                                          | Holden (2009) [61]   |
| 14 | Physical therapists should (perhaps) not prescribe general exercise for every patient with knee OA (*)                                   | Holden (2009) [61]   |
| 15 | It is the patient's own responsibility to continue doing their exercise program (*)                                                      | Holden (2009) [61]   |
| 16 | It is not/might not be the physiotherapist's responsibility to make sure that the patient will continue doing their exercise program (*) | Holden (2009) [61]   |
| 17 | Negative consequences for own role when referring patients to LIs (barrier)                                                              |                      |
| 18 | Job satisfaction may be diminished when handing over care of their patients to third party with no involvement                           | Egerton (2017) [32]  |
| 19 | The addition of a care support team may lead them feeling disconnected with their patient's care                                         | Egerton (2017) [32]  |
| 20 | Perception of own role potentially stimulating prescription or follow-up of LIs (facilitator)                                            |                      |
| 21 | Patient-centred approach (high level of engagement in providing exercise and weight management advice)                                   | Egerton (2018) [33]  |
| 22 | Viewing themselves as having an important role in supporting clients to participate in management                                        | MacKay (2018) [41]   |
| 23 | Routinely including education about weight management                                                                                    | MacKay (2020) [42]   |
| 24 | Playing a role in promoting engagement in management                                                                                     | MacKay (2020) [42]   |
| 25 | Necessity of physiotherapy to effectively rehabilitate knee OA patients (because of knowledge/availability)                              | Poitras (2010) [47]  |
| 26 | Importance of PT's role in educating patients with regards to NSAIDs/alternatives (including physiotherapy)                              | Poitras (2010) [47]  |
| 27 | Necessity of PT involvement in managing activity (because potentially detrimental if excessive)                                          | Poitras (2010) [47]  |
| 28 | Exercise planning is usually PT's role (rather than GP's)                                                                                | Poitras (2010) [47]  |
| 29 | Necessity of PT follow-up sessions to assess and encourage patient adherence                                                             | Poitras (2010) [47]  |
| 30 | PT's role to individualize patients' activity according to needs and capacity                                                            | Poitras (2010) [47]  |
| 31 | Although agreeing with active patient participation, it is ultimately PT's role to appropriately manage patients                         | Poitras (2010) [47]  |
| 32 | Desire to be more involved in life style counselling (upgrade of profession)                                                             | Rosemann (2006) [48] |
| 33 | Perceiving exercise prescription to be their main role                                                                                   | Teo (2020) [51]      |
| 34 | Advising patients against surgery for as long as possible (last option)                                                                  | Teo (2020) [51]      |
| 35 | Implementing several strategies to boost adherence                                                                                       | Teo (2020) [51]      |
| 36 | Not their role to advise the patient about knee surgery, opting not to discuss surgery at all                                            | Teo (2020) [51]      |
| 37 | Advising patients against knee arthroscopy if specifically asked about this procedure                                                    | Teo (2020) [51]      |
| 38 |                                                                                                                                          |                      |
| 39 |                                                                                                                                          |                      |
| 40 |                                                                                                                                          |                      |
| 41 |                                                                                                                                          |                      |
| 42 |                                                                                                                                          |                      |
| 43 |                                                                                                                                          |                      |
| 44 |                                                                                                                                          |                      |
| 45 |                                                                                                                                          |                      |
| 46 |                                                                                                                                          |                      |

|                                                                                                                                   |                      |
|-----------------------------------------------------------------------------------------------------------------------------------|----------------------|
| It is part of my job to reassure patients about the safety of exercise for CKP (*)                                                | Cottrell (2016) [53] |
| GPs should educate patients with CKP about how to change their lifestyle for the better (*)                                       | Cottrell (2016) [53] |
| GPs should prescribe quadriceps strengthening exercises to every patient with CKP (*)                                             | Cottrell (2016) [53] |
| GPs should prescribe general exercise (e.g. walking or swimming) for every patient with CKP (*)                                   | Cottrell (2016) [53] |
| There was a BMI threshold above which they would not perform a TKA at all (*)                                                     | Hill (2018) [55]     |
| There was a BMI threshold above which they would not perform a TKA until the patient had attended a weight management program (*) | Hill (2018) [55]     |
| Intention to refer patients to an ortho-bariatric centre if it existed (*)                                                        | Hill (2018) [56]     |
| Recognizing potential influence on exercise adherence, sharing responsibility of exercise adherence with patient                  | Holden (2009) [61]   |
| Physical therapists should prescribe local strengthening exercise for every patient with knee OA (*)                              | Holden (2009) [61]   |
| Physiotherapists should educate chronic patients with knee OA about how to change their lifestyle for the better (*)              | Holden (2009) [61]   |
| Positive consequences for own role when referring patients to LIs (facilitator)                                                   |                      |
| Some appeal for a lessening of their own responsibility in terms of managing this condition                                       | Egerton (2017) [32]  |

### Domain 3: Patient factors

#### Health status

| Description                                                                                                      | Reference           |
|------------------------------------------------------------------------------------------------------------------|---------------------|
| Severity of disease and symptoms (barrier)                                                                       |                     |
| Level of disease severity (i.e. whether people with very mild or very severe joint disease would benefit)        | Egerton (2017) [32] |
| Patients delay care until they are highly symptomatic (missing opportunities to slow disease progression)        | Miller (2020) [44]  |
| Rehabilitation potential depended on length of disability (less potential with late management)                  | Poitras (2010) [47] |
| Paracetamol could mask pain/underlying physical problem (reducing opportunity to assess/manage problem)          | Poitras (2010) [47] |
| Difficult to obtain effective analgesia with some patients                                                       | Poitras (2010) [47] |
| Potential to create unrealistic expectations and discouragement in patients that were too disabled               | Poitras (2010) [47] |
| Questioning capacity to perform regular exercise because of severity of disability                               | Poitras (2010) [47] |
| Knee pain restricts activities in general (which makes weight loss difficult)                                    | Poitras (2010) [47] |
| Pain (main barrier resulting in reduced dosage prescription of strengthening exercises)                          | Tang (2020) [50]    |
| Patient's ability to exercise (main barrier resulting in reduced dosage prescription of strengthening exercises) | Tang (2020) [50]    |
| Pain (key barrier to prescription of exercise as recommended by CPGs)                                            | Tang (2020) [50]    |
| Pain (barrier to prescription of aerobic exercise)                                                               | Tang (2020) [50]    |
| Osteoarthritis severity (mild/severe) (patient-related barrier)                                                  | Wallis (2020) [52]  |
| Effectiveness related to severity of joint damage/pain level (less effective when more damage/pain)              | Holden (2009) [61]  |
| Reluctant to promote exercise in the presence of pain                                                            | Holden (2009) [61]  |
| Pain (as patient-centered barrier to adherence)                                                                  | Holden (2009) [61]  |
| Exercises are not/might not be effective for patients if an X-ray shows severe knee osteoarthritis (*)           | Holden (2009) [61]  |
| Negative impact of comorbidities (barrier)                                                                       |                     |

|    |                                                                                                                                      |                          |
|----|--------------------------------------------------------------------------------------------------------------------------------------|--------------------------|
| 1  | Difficulty with managing multiple conditions/tendency to prioritize other conditions over OA                                         | Christiansen (2020) [29] |
| 2  | Significant impact of other health problems on patients' ability to commit fully to exercise program                                 | Lawford (2020) [39]      |
| 3  | Patient body weight (overweight/obese) (impedes exercise/makes visits to services more difficult)                                    | Miller (2020) [44]       |
| 4  | Questioning capacity to perform regular exercise because of general health                                                           | Poitras (2010) [47]      |
| 5  | Depression as important barrier to motivate patients to physical exercise                                                            | Rosemann (2006) [48]     |
| 6  | Comorbidities (often more severe pain, hampering ability to exercise or be physically active)                                        | Teo (2020) [51]          |
| 7  | Existing comorbidities (patient-related barrier)                                                                                     | Wallis (2020) [52]       |
| 8  | <b>Other patient characteristics (barrier)</b>                                                                                       |                          |
| 9  | Person had been sedentary throughout life                                                                                            | Poitras (2010) [47]      |
| 10 | Questioning capacity to perform regular exercise because of age                                                                      | Poitras (2010) [47]      |
| 11 | Patients with knee OA tended to be older/less active/with slower metabolism (which makes weight loss difficult)                      | Poitras (2010) [47]      |
| 12 | Older age (patient-related barrier)                                                                                                  | Wallis (2020) [52]       |
| 13 | Poor rate of previous (physiotherapy) success (*)                                                                                    | Reid (2014) [59]         |
| 14 | <b>Severity of disease and symptoms (facilitator)</b>                                                                                |                          |
| 15 | Most patients tolerated a lot more than was expected (amount of exercise)                                                            | Lawford (2020) [39]      |
| 16 | Rehabilitation potential depended on length of disability (better outcomes with early management)                                    | Poitras (2010) [47]      |
| 17 | Effective analgesia necessary for patients to be able to accomplish activities                                                       | Poitras (2010) [47]      |
| 18 | Exercise is effective for patients if an X-ray shows severe knee OA (*)                                                              | Cottrell (2016) [53]     |
| 19 | Referring patients to physiotherapy if they had high levels of pain/disability and where radiographic evidence of OA was present (*) | Reid (2014) [59]         |
| 20 | Effectiveness related to severity of joint damage/pain level (more effective when less damage/pain)                                  | Holden (2009) [61]       |
| 21 | Exercises are effective for patients if an X-ray shows moderate knee osteoarthritis (*)                                              | Holden (2009) [61]       |
| 22 | Exercises are effective for patients if an X-ray shows mild knee osteoarthritis (*)                                                  | Holden (2009) [61]       |
| 23 | <b>Other patient characteristics (facilitator)</b>                                                                                   |                          |
| 24 | Clients' pre-existing activity level (e.g. active person)                                                                            | MacKay (2018) [41]       |
| 25 | Importance of evaluating a patient's overall functional ability (rather than only knee signs/symptoms)                               | Teo (2020) [51]          |
| 26 | Referring patients to physiotherapy if they were of a younger age (*)                                                                | Reid (2014) [59]         |
| 27 | <b>Severity of disease and symptoms (unclear factor)</b>                                                                             |                          |
| 28 | Treatment decisions depended on people's symptoms/findings of physical assessment                                                    | MacKay (2020) [42]       |
| 29 | Management strategies depended on how bad the knee is                                                                                | Okwera (2019) [46]       |
| 30 | Exercise does not/might not work just as well for everybody, regardless of the amount of pain they have (*)                          | Cottrell (2016) [53]     |
| 31 | Exercise does not/might not work just as well for everybody, regardless of the amount of pain they have (*)                          | Holden (2009) [61]       |
| 32 | <b>Other patient characteristics (unclear factor)</b>                                                                                |                          |
| 33 | Clients' general health                                                                                                              | MacKay (2018) [41]       |

### *Treatment expectations and preferences*

| Description | Reference |
|-------------|-----------|
|-------------|-----------|



|                                                                                                                       |                          |
|-----------------------------------------------------------------------------------------------------------------------|--------------------------|
| Negative attitude toward LIs (barrier)                                                                                |                          |
| Patients' lack of motivation to exercise/patients want passive treatment approach or quick fix                        | Christiansen (2020) [29] |
| Patients often have own ideas on management (problematic if primarily passive treatments)                             | Egerton (2018) [33]      |
| Reluctance from patients to talk about physical activity (physical therapist's role, not the coach's role)            | Hinman (2016) [34]       |
| Interdisciplinary consult with dietician could not always take place because patients refused to visit dietician      | Knoop (2020) [36]        |
| People that don't particularly like exercise                                                                          | Lawford (2020) [39]      |
| Disconnect between PTs' recommendations for treatment and clients' expectations or preferences                        | MacKay (2018) [41]       |
| Prior experiences with physical therapy influenced client expectations of clinical encounter                          | MacKay (2018) [41]       |
| People's preferences were at odds with physical therapists' beliefs about management                                  | MacKay (2020) [42]       |
| Doubts about patients' willingness to make behavioral changes                                                         | Mann (2011) [43]         |
| Patients don't want to expend effort towards lifestyle change                                                         | Miller (2020) [44]       |
| Public expectation of what physical therapy treatment should be (e.g. didn't come to have thinking challenged)        | Nielsen (2014) [45]      |
| Feeling that patients tended to prefer treatment administered to them                                                 | Okwera (2019) [46]       |
| Negative comments about patient reports of a lack of "hands-on" physiotherapy                                         | Okwera (2019) [46]       |
| Benefits obtained in the long term, which often conflicted with patient expectations for short-term benefits          | Poitras (2010) [47]      |
| Lack of patient motivation in remaining active despite knee OA                                                        | Poitras (2010) [47]      |
| Patient views and expectations rarely matched patient needs                                                           | Poitras (2010) [47]      |
| Questioning capacity to perform regular exercise because of motivation                                                | Poitras (2010) [47]      |
| Success rate in motivating patients too low (distinctly resigned regarding their impact on patients' life style)      | Rosemann (2006) [48]     |
| Frustration about impact of information (e.g. self-help groups) (lot of patients find excuses not to participate)     | Rosemann (2006) [48]     |
| Self-motivation (intrinsic barrier for patient adherence)                                                             | Teo (2020) [51]          |
| Patient expectations (not keen to participate in exercise/play active role in management, desire for quick fix)       | Teo (2020) [51]          |
| Lack of motivation to participate active lifestyle interventions (patient-related barrier)                            | Wallis (2020) [52]       |
| Existing relationships with physiotherapists (as barrier to referral if patient already had treating physiotherapist) | Wallis (2020) [52]       |
| Exercise does not match patient needs/expectations (*)                                                                | Cottrell (2016) [53]     |
| The patients are not/might not be cooperative in applying the protocol in daily clinical practice (*)                 | De Rooij (2020) [60]     |
| Patients with knee OA and comorbidity are not always motivated to perform exercises                                   | De Rooij (2020) [60]     |
| Lack of motivation or laziness (as patient-centered barrier to adherence)                                             | Holden (2009) [61]       |
| Negative treatment expectations (as patient-centered barrier to adherence)                                            | Holden (2009) [61]       |
| Positive attitude toward TJA (barrier)                                                                                |                          |
| Patients' ideas about whether they wanted surgery influenced making referrals to the LMP                              | Law (2019) [37]          |
| Unrealistic expectations of the outcome of joint replacement among patients                                           | Mann (2011) [43]         |
| Feeling pressure by patients to refer them to specialist                                                              | Rosemann (2006) [48]     |
| Make use of patients' preference for TJA within LIs (facilitator)                                                     |                          |
| Suggestion to relist patients completing the programme further up the waiting list (for surgery)                      | Law (2019) [37]          |
| Using bargaining techniques centering on implications of LMP for replacement surgery (put patient on the list)        | Law (2019) [37]          |
| Patients' preferences (unclear factor)                                                                                |                          |

|                                                         |                    |
|---------------------------------------------------------|--------------------|
| Management strategies depended on what the person wants | Okwera (2019) [46] |
|---------------------------------------------------------|--------------------|

### *Active participation*

| Description                                                                                                   | Reference            |
|---------------------------------------------------------------------------------------------------------------|----------------------|
| <b>Low patient adherence or engagement (barrier)</b>                                                          |                      |
| Shifting patients' mind-sets to active participation/making lifestyle changes was challenging/time consuming  | Egerton (2018) [33]  |
| How well they felt the individual patient would engage with programme influenced making referrals to the LMP  | Law (2019) [37]      |
| Challenging work to get clients to initiate management and maintain it over the long term                     | MacKay (2018) [41]   |
| Getting buy-in (engaging people in management) often portrayed as challenge                                   | MacKay (2020) [42]   |
| Lack of compliance with home exercise regimes and advice given to patients was common                         | Okwera (2019) [46]   |
| Patients' adherence to management recommendations was limited (because of fatalism)                           | Poitras (2010) [47]  |
| Patients' unsatisfactory adherence to exercise programs                                                       | Teo (2020) [51]      |
| Main concern was participant adherence to physical activity routines after end of program                     | Duarte (2019) [54]   |
| Negative perceptions of patients' levels of exercise adherence                                                | Holden (2009) [61]   |
| <b>High patient adherence or engagement (facilitator)</b>                                                     |                      |
| Positive impact of information, education, and structured monitoring on patients' adherence to exercise       | Hinman (2016) [34]   |
| Patients adherent/easy to work with when they engaged in exercise program/started seeing improvements         | Lawford (2020) [39]  |
| Cohort of patients, in general, was highly motivated (remained interested/motivated for entirety of 6 months) | Lawford (2021) [40]  |
| Enthusiastic participation of the participants                                                                | Duarte (2019) [54]   |
| <b>Importance of high patient adherence or engagement for effectiveness of LIs (facilitator)</b>              |                      |
| Exercise progression was most effective when the participant requested progression                            | Davis (2018) [30]    |
| Client participation in management was critical to see improvement in symptoms                                | MacKay (2018) [41]   |
| Getting buy-in (engaging people in management) critical to improving outcomes                                 | MacKay (2020) [42]   |
| Necessity of patients' active participation in knee OA management (to achieve significant outcomes)           | Poitras (2010) [47]  |
| How well a patient complies with their exercise programme determines how effective it will be (*)             | Cottrell (2016) [53] |
| Importance of exercise adherence/link between level of adherence and clinical outcomes (dose-response effect) | Holden (2009) [61]   |
| How well a patient complies with their exercise program determines how effective it will be (*)               | Holden (2009) [61]   |

### *Capabilities*

| Description                                                                                                           | Reference           |
|-----------------------------------------------------------------------------------------------------------------------|---------------------|
| <b>Low health literacy (barrier)</b>                                                                                  |                     |
| Poor health literacy in chronic disease management negatively influenced discussing exercise/weight management        | Egerton (2018) [33] |
| Diagnosis can foster fear-avoidance (e.g. reduced activity) due to belief activity/exercise will cause further damage | Egerton (2018) [33] |
| Pessimistic about patients' abilities to make lifestyle changes to address their knee OA (not capable)                | Egerton (2018) [33] |
| Lack of information and patient-professional discussion at point of referral may hinder uptake/retention of LMP       | Law (2019) [37]     |

|    |                                                                                                          |                      |
|----|----------------------------------------------------------------------------------------------------------|----------------------|
| 1  |                                                                                                          |                      |
| 2  |                                                                                                          |                      |
| 3  | Patients were sceptical about safety and benefits of strengthening exercise for OA                       | Lawford (2020) [39]  |
| 4  | Fear (patients required a lot of encouragement and reassurance)                                          | Lawford (2020) [39]  |
| 5  | Patients were apprehensive about managing weight by themselves                                           | Lawford (2021) [40]  |
| 6  | Some clients had misconceptions about OA (nothing they could do/normalising it as part of ageing)        | MacKay (2018) [41]   |
| 7  | Some clients feared participation in exercise (concerns for further degeneration)                        | MacKay (2018) [41]   |
| 8  | Accepting diagnosis of OA could be particularly challenging for people with early OA                     | MacKay (2018) [41]   |
| 9  | Clients' language (e.g. haven't mastered English/French)                                                 | MacKay (2018) [41]   |
| 10 | Clients' lifestyle (e.g. coping, attitude towards pain)                                                  | MacKay (2018) [41]   |
| 11 | Insufficient information for OA patients (e.g. not providing leaflets)                                   | Mann (2011) [43]     |
| 12 | Difficulty convincing patients to consider non-surgical, non-medication treatments                       | Miller (2020) [44]   |
| 13 | Lack of patient self-efficacy (regarding lifestyle changes)                                              | Miller (2020) [44]   |
| 14 | Lack of knowledge about OA (patient barrier)                                                             | Miller (2020) [44]   |
| 15 | Most patients demonstrated fatalism/inadequate knowledge and beliefs related to knee OA management       | Poitras (2010) [47]  |
| 16 | Ambivalent about patients' ability to lose weight (not able to succeed in making lifestyle changes)      | Selten (2017) [49]   |
| 17 | The belief that patients are not capable of losing weight                                                | Selten (2017) [49]   |
| 18 | Fear of falling (intrinsic barrier for patient adherence)                                                | Teo (2020) [51]      |
| 19 | Fear of pain (intrinsic barrier for patient adherence)                                                   | Teo (2020) [51]      |
| 20 | Language/different cultural backgrounds (patient-related barrier)                                        | Wallis (2020) [52]   |
| 21 | Patients do not always believe in/may lack knowledge about effectiveness of exercise therapy             | De Rooij (2020) [60] |
| 22 | Fear of harm (as patient-centered barrier to adherence)                                                  | Holden (2009) [61]   |
| 23 | Limited financial resources (barrier)                                                                    |                      |
| 24 | Clients' socioeconomic status (e.g. great poverty, shelter system)                                       | MacKay (2018) [41]   |
| 25 | Costs related to weight loss can be prohibitive for patients with limited resources (financial burdens)  | Miller (2020) [44]   |
| 26 | Other responsibilities (barrier)                                                                         |                      |
| 27 | Clients' family responsibilities (e.g. busy, lot going on)                                               | MacKay (2018) [41]   |
| 28 | Work/other commitments precluding exercise-therapy (patient-related barrier)                             | Wallis (2020) [52]   |
| 29 | High health literacy or importance of education (facilitator)                                            |                      |
| 30 | Importance of pain education and reassurance about safety and benefits of exercise                       | Lawford (2020) [39]  |
| 31 | Education contributed to buy-in to treatment (pathology, consequences, treatments)                       | MacKay (2020) [42]   |
| 32 | Need for early education about OA/self-management and treatment options and opportunity to discuss these | Mann (2011) [43]     |
| 33 | Ambivalent about patients' ability to lose weight (able)                                                 | Selten (2017) [49]   |
| 34 | Education focused on self-management strategies                                                          | Teo (2020) [51]      |
| 35 | Inform patients with knee OA and comorbidity better about benefits of exercise therapy                   | De Rooij (2020) [60] |
| 36 | Social support (facilitator)                                                                             |                      |
| 37 | Level of support patients had from family/people close to them seemed to make a big difference           | Lawford (2021) [40]  |
| 38 | Integrating patients' social system into treatment                                                       | Rosemann (2006) [48] |
| 39 | Health literacy (unclear factor)                                                                         |                      |
| 40 |                                                                                                          |                      |
| 41 |                                                                                                          |                      |
| 42 |                                                                                                          |                      |
| 43 |                                                                                                          |                      |
| 44 |                                                                                                          |                      |
| 45 |                                                                                                          |                      |
| 46 |                                                                                                          |                      |

|                                                                 |                    |
|-----------------------------------------------------------------|--------------------|
| Management strategies depended on what the person can cope with | Okwera (2019) [46] |
| Other responsibilities (unclear factor)                         |                    |
| Clients' occupation                                             | MacKay (2018) [41] |

#### Domain 4: Professional interactions

##### *Collaboration*

| <b>Description</b>                                                                                                    | <b>Reference</b>     |
|-----------------------------------------------------------------------------------------------------------------------|----------------------|
| Non-optimal interdisciplinary collaboration or healthcare provision (barrier)                                         |                      |
| Cautious not to encroach on other HCPs' territory                                                                     | Allison (2019) [27]  |
| Potential for confusion about the treatment plan                                                                      | Egerton (2017) [32]  |
| Potential for issues resulting from incongruence of patient advice and information                                    | Egerton (2017) [32]  |
| Second professional not necessary to fulfill health coach role (part of own professional role as physical therapists) | Hinman (2016) [34]   |
| Overlapping roles of physical therapist and coach could be source of conflict if not working from same set of goals   | Hinman (2016) [34]   |
| Necessary teamwork less likely if coach/physical therapist did not recognize/support each other's goals               | Hinman (2016) [34]   |
| Physicians who did not make timely referrals to physical therapy                                                      | MacKay (2018) [41]   |
| Physicians' attitudes could influence clients' perceptions and level of buy-in to physical therapy                    | MacKay (2018) [41]   |
| Lack of provision for patients who were not candidates for surgery (too long without help)                            | Mann (2011) [43]     |
| Patients lacked proactive follow-up to support self-management                                                        | Mann (2011) [43]     |
| Lack of coordination between leisure, social and health services                                                      | Mann (2011) [43]     |
| Insufficient (physiotherapy) intervention when patients were seen                                                     | Mann (2011) [43]     |
| Belief that physiotherapists did not find it rewarding/interesting to treat OA patients                               | Mann (2011) [43]     |
| Criticizing the decision to centralize musculoskeletal physiotherapy service (useful to have somebody in team)        | Okwera (2019) [46]   |
| Frustrations about lack of continuity regarding team of physiotherapists within clinic                                | Okwera (2019) [46]   |
| Not working closely with physiotherapists/frustrations about working relationship                                     | Okwera (2019) [46]   |
| Dissatisfaction about loss of coherent working since centralizing musculoskeletal physiotherapy service               | Okwera (2019) [46]   |
| Disagreement on effective exercise parameters                                                                         | Poitras (2010) [47]  |
| Disagreement on optimal design of exercise programs to increase adherence                                             | Poitras (2010) [47]  |
| Mistrust in interventions dieticians use to help patients' with weight reduction attempts                             | Selten (2017) [49]   |
| Negative views about physical therapists who provided non-evidence-based treatments                                   | Selten (2017) [49]   |
| Mistrust because they observed huge differences in quality of care delivered by physical therapists                   | Selten (2017) [49]   |
| Occupational therapists, podiatrists and physical therapists do not work together optimally in OA care                | Selten (2017) [49]   |
| Role of rheumatologist in knee/hip OA care perceived as unclear/limited                                               | Selten (2017) [49]   |
| Agreement that orthopedic surgeon's primary task is to assess whether patient is eligible for surgery                 | Selten (2017) [49]   |
| Orthopedic surgeons were perceived negatively by several healthcare providers                                         | Selten (2017) [49]   |
| Unclear what physio offers (*)                                                                                        | Cottrell (2016) [53] |

|    |                                                                                                                                                           |                      |
|----|-----------------------------------------------------------------------------------------------------------------------------------------------------------|----------------------|
| 1  | My colleagues in physiotherapy are not/might not be cooperative in applying the protocol in daily clinical practice (*)                                   | De Rooij (2020) [60] |
| 2  | The general practitioners or other physicians are not/might not be collaborative regarding the application of the protocol in daily clinical practice (*) | De Rooij (2020) [60] |
| 3  | Suboptimal collaboration with general practitioners and physicians                                                                                        | De Rooij (2020) [60] |
| 4  | Referring physicians do not always believe in/may lack knowledge about effectiveness of exercise therapy                                                  | De Rooij (2020) [60] |
| 5  | No access to other HCPs (barrier)                                                                                                                         |                      |
| 6  | Lack of access to other healthcare providers (e.g. physicians with expertise in OA)                                                                       | MacKay (2018) [41]   |
| 7  | Good interdisciplinary collaboration or healthcare provision, or suggestions for improvement (facilitator)                                                |                      |
| 8  | Perceived status of physical therapists within health care team and wider community                                                                       | Allison (2019) [27]  |
| 9  | Importance of clearly understanding roles and functions of service, care support team, and themselves                                                     | Egerton (2017) [32]  |
| 10 | Importance of having confidence in (the skills of) the staff of a new service to deliver on promises                                                      | Egerton (2017) [32]  |
| 11 | Having a personal relationship with the people providing the service/a desire to work closely with service staff                                          | Egerton (2017) [32]  |
| 12 | Appreciation how their participation afforded physical therapists and coaches opportunities to collaborate                                                | Hinman (2016) [34]   |
| 13 | Importance of teamwork in delivering the integrated intervention                                                                                          | Hinman (2016) [34]   |
| 14 | Reinforcement of health messages from another clinician could be valuable                                                                                 | Hinman (2016) [34]   |
| 15 | Having a separate coach freed therapists up to focus on other treatment aspects                                                                           | Hinman (2016) [34]   |
| 16 | Multidisciplinary nature of LMP (ability to utilize expertise from other professionals)                                                                   | Law (2019) [37]      |
| 17 | Importance of good working relationships                                                                                                                  | MacKay (2018) [41]   |
| 18 | Physicians who expressed support for physical therapy/exercise and referred clients to physical therapy early                                             | MacKay (2018) [41]   |
| 19 | Patients would be better served by long-term condition model of care (e.g. diabetes mellitus)                                                             | Mann (2011) [43]     |
| 20 | Patients should initiate own follow-up when needed (as better use of time/health care resources)                                                          | Mann (2011) [43]     |
| 21 | Allow patients, after initial referral, to use direct access system to service (no need for re-referral)                                                  | Mann (2011) [43]     |
| 22 | Utilising clinic health educator who met with patients for weight loss discussions and followed up by phone                                               | Miller (2020) [44]   |
| 23 | Employing a multi-pronged approach to engage patients in weight loss                                                                                      | Miller (2020) [44]   |
| 24 | Overall positive experience of physiotherapy service and therapists                                                                                       | Okwera (2019) [46]   |
| 25 | GPs believed PT involvement was necessary to motivate the patient and manage the exercise program                                                         | Poitras (2010) [47]  |
| 26 | Gate keeper role for GPs could reduce patients' pressure to refer to orthopaedics/decrease performed x-rays                                               | Rosemann (2006) [48] |
| 27 | Involvement of practice nurses is imaginable in the area of life style counselling and advice giving                                                      | Rosemann (2006) [48] |
| 28 | Dieticians are helpful for patients trying to lose weight                                                                                                 | Selten (2017) [49]   |
| 29 | Need for physical therapists to provide evidence-based exercises instead of non-evidence-based modalities                                                 | Selten (2017) [49]   |
| 30 | Non-pharmacological, non-surgical OA care can and should be provided in a primary care setting                                                            | Selten (2017) [49]   |
| 31 | GPs have coordinating role (diagnose/monitor, refer when necessary, lifestyle education, long-term coach)                                                 | Selten (2017) [49]   |
| 32 | Physical therapists can guide patients/provide lifestyle advice (more time compared with GPs)                                                             | Selten (2017) [49]   |
| 33 | Perceiving rheumatologists' role as valuable (giving injections, providing lifestyle/medication advice, refer)                                            | Selten (2017) [49]   |
| 34 | Knowledge that program was delivered by well-trained and trusted physiotherapist                                                                          | Wallis (2020) [52]   |
| 35 | Exercise for CKP is more effectively provided by physiotherapists than GPs (*)                                                                            | Cottrell (2016) [53] |
| 36 | Obese patients with symptomatic knee OA should be assessed by a specialist multidisciplinary service, which should include an orthopaedic surgeon (*)     | Hill (2018) [55]     |
| 37 |                                                                                                                                                           |                      |
| 38 |                                                                                                                                                           |                      |
| 39 |                                                                                                                                                           |                      |
| 40 |                                                                                                                                                           |                      |
| 41 |                                                                                                                                                           |                      |
| 42 |                                                                                                                                                           |                      |
| 43 |                                                                                                                                                           |                      |
| 44 |                                                                                                                                                           |                      |
| 45 |                                                                                                                                                           |                      |
| 46 |                                                                                                                                                           |                      |

|                                                                                                                                                                                    |                      |
|------------------------------------------------------------------------------------------------------------------------------------------------------------------------------------|----------------------|
| Support for creation of regional centres where orthopedic surgeons and bariatric surgeons, with their respective teams, could assess obese patients with symptomatic knee pain (*) | Hill (2018) [55]     |
| Obese patients with symptomatic knee OA should be referred to a specialist weight management service before orthopaedic assessment (*)                                             | Hill (2018) [56]     |
| Obese patients with symptomatic knee OA should be assessed by a specialist multidisciplinary service (*)                                                                           | Hill (2018) [56]     |
| Agreements with colleagues about the content of the care trajectory (*)                                                                                                            | Hofstede (2016) [57] |
| Positive attitudes of colleagues about non-surgical treatments (*)                                                                                                                 | Hofstede (2016) [57] |
| Agreements/ deliberations with primary care (GP, physical therapist, dietician) (*)                                                                                                | Hofstede (2016) [57] |
| Physiotherapists do not/might not lack expertise in OA management (*)                                                                                                              | Reid (2014) [59]     |
| Working with the protocol invites me to discuss more with experts in the field of the comorbidity (*)                                                                              | De Rooij (2020) [60] |
| Inform referrers better about benefits of exercise therapy in patients with knee OA and comorbidity                                                                                | De Rooij (2020) [60] |
| Optimize collaboration with orthopaedic surgeons and other health care providers                                                                                                   | De Rooij (2020) [60] |
| Support from colleagues                                                                                                                                                            | Kloek (2020) [62]    |
| <b>Access to other HCPs (facilitator)</b>                                                                                                                                          |                      |
| Potential benefit of increased access to OA specialists                                                                                                                            | Egerton (2017) [32]  |
| Access to a team on-site/a network of healthcare providers they trusted                                                                                                            | MacKay (2018) [41]   |
| Those with access to other clinicians recommended to consult another clinician for advice on diet as needed                                                                        | MacKay (2020) [42]   |
| Care could be improved if every GP practice contained an individual who took a particular interest in OA                                                                           | Mann (2011) [43]     |
| There should be OA specialist clinicians (all relevant allied health professions) providing services in community                                                                  | Mann (2011) [43]     |
| In-house physiotherapy (as suggestion for physiotherapy service improvement)                                                                                                       | Okwera (2019) [46]   |

### *Communication and referral*

| <b>Description</b>                                                                                                 | <b>Reference</b>     |
|--------------------------------------------------------------------------------------------------------------------|----------------------|
| <b>Lack of communication between HCPs (barrier)</b>                                                                |                      |
| Frustrations about lack of contact/communication involved in the referral and discharge process                    | Okwera (2019) [46]   |
| Dissatisfaction about loss of communication since centralizing musculoskeletal physiotherapy service               | Okwera (2019) [46]   |
| Specialist did not take time to explain what they had examined/x-rays he had taken                                 | Rosemann (2006) [48] |
| Physicians are not always collaborating in discussing medical conditions of patients                               | De Rooij (2020) [60] |
| <b>Challenges of communication and referral procedures (barrier)</b>                                               |                      |
| Necessary teamwork less likely if communication processes not clearly prescribed/structure not used                | Hinman (2016) [34]   |
| Different views were expressed about the preferred medium of communication                                         | Hinman (2016) [34]   |
| Interdisciplinary consult with dietician could not always take place because of problems with contacting dietician | Knoop (2020) [36]    |
| Challenges when coordinating multimodal care (including difficulties with the referral system)                     | Miller (2020) [44]   |
| Frustrations about restrictive referral pathways                                                                   | Okwera (2019) [46]   |
| Referral process was convoluted and at times irrelevant                                                            | Okwera (2019) [46]   |
| Requesting medical information about patients from specialists takes a lot of time                                 | De Rooij (2020) [60] |
| <b>Improving communication between HCPs (facilitator)</b>                                                          |                      |

1  
2  
3  
4  
5  
6  
7  
8  
9  
10  
11  
12  
13  
14  
15  
16  
17  
18  
19  
20  
21  
22  
23  
24  
25  
26  
27  
28  
29  
30  
31  
32  
33  
34  
35  
36  
37  
38  
39  
40  
41  
42  
43  
44  
45  
46

|                                                                                                               |                      |
|---------------------------------------------------------------------------------------------------------------|----------------------|
| GPs wanted to be updated on the advice given and plan made so they know what has been said to their patient   | Egerton (2017) [32]  |
| Communication needed to be collaborative, patient-centered and consistent for integrated care to be effective | Hinman (2016) [34]   |
| Need for improving communication (quality of referrals, information at discharge)                             | Okwera (2019) [46]   |
| Better communication with specialists could increase efficacy of treatment                                    | Rosemann (2006) [48] |
| Receiving communication back from program physiotherapist about patient outcomes                              | Wallis (2020) [52]   |
| Clarity on what the patient has done at the physical therapist (*)                                            | Hofstede (2016) [57] |
| <b>Needs regarding communication and referral procedures (facilitator)</b>                                    |                      |
| Need to ensure referral procedures are streamlined in order to minimize impact on their busy schedules        | Egerton (2017) [32]  |
| Need for effective, useful and timely channels of communication between the GP and the care support team      | Egerton (2017) [32]  |
| Importance of effective mechanisms to communicate                                                             | MacKay (2018) [41]   |
| Streamlining the physiotherapy referral process (as suggestion for physiotherapy service improvement)         | Okwera (2019) [46]   |
| Straightforward, easy and quick lines of communication among different disciplines in healthcare center       | Selten (2017) [49]   |
| Simple, streamlined referral process (suggestion for promotion and referrals)                                 | Wallis (2020) [52]   |

Domain 5: Incentives and resources

*Time*

| Description                                                                                              | Reference            |
|----------------------------------------------------------------------------------------------------------|----------------------|
| <b>Lack of time within patient consultations (barrier)</b>                                               |                      |
| Time pressure (unable to individualise weight management/develop exercise plans within appointment time) | Egerton (2018) [33]  |
| Restricted in amount of time they could allot per patient                                                | MacKay (2018) [41]   |
| Lack of time to give patients sufficient opportunity to discuss their condition                          | Mann (2011) [43]     |
| Lifestyle counseling is huge time commitment                                                             | Miller (2020) [44]   |
| Appointment times too short to address all of patient's issues and provide lifestyle counseling          | Miller (2020) [44]   |
| Time required to teach PCST skills to patients                                                           | Nielsen (2014) [45]  |
| Weight reduction advice takes too much time in a consultation                                            | Selten (2017) [49]   |
| Insufficient time in consultations (*)                                                                   | Cottrell (2016) [53] |
| Time constraints prevent GPs from providing advice on individual exercises for CKP (*)                   | Cottrell (2016) [53] |
| Limited time to review individual patients reduced opportunities to facilitate behavior change           | Holden (2009) [61]   |
| Large caseloads and pressure of waiting lists reduced the number of treatment sessions provided          | Holden (2009) [61]   |
| Limited opportunity to provide follow-up sessions after discharge                                        | Holden (2009) [61]   |
| <b>Lack of time due to other demands (or not further specified) (barrier)</b>                            |                      |
| The addition of a care support team may increase paperwork                                               | Egerton (2017) [32]  |
| Lack of time to monitor attendance/provide support was compounded by increasing administrative demands   | Law (2019) [37]      |
| Wait lists as a burden                                                                                   | MacKay (2018) [41]   |
| Lack of time                                                                                             | Rosemann (2006) [48] |

|                                                                                                                        |                      |
|------------------------------------------------------------------------------------------------------------------------|----------------------|
| Less satisfied about time needed to get used to e-Exercise during high work pressure/administrative burden             | Kloek (2020) [62]    |
| Perceiving web-based application as an additional burden                                                               | Kloek (2020) [62]    |
| Busy work schedules and administrative burden hindered testing/using e-Exercise in their practice                      | Kloek (2020) [62]    |
| <b>Adequate duration of patient consultations (facilitator)</b>                                                        |                      |
| Importance of longer consultations                                                                                     | Egerton (2018) [33]  |
| Having adequate time to spend with clients                                                                             | MacKay (2018) [41]   |
| <b>Adequate duration of specific interventions or protocols (facilitator)</b>                                          |                      |
| Idea of having some of the burden of managing this patient group (e.g. time) taken away appealing                      | Egerton (2017) [32]  |
| Incorporating selected PCST components on as-needed basis most practical way within current environment                | Nielsen (2014) [45]  |
| Working according to the protocol is not/might not be too time-consuming (*)                                           | De Rooij (2020) [60] |
| Perceiving web-based application as time-saving                                                                        | Kloek (2020) [62]    |
| I do not/might not have insufficient time available to get familiar with e-Exercise and to use the web-application (*) | Kloek (2020) [62]    |

### *Financial resources*

| <b>Description</b>                                                                                | <b>Reference</b>     |
|---------------------------------------------------------------------------------------------------|----------------------|
| <b>Limited financial resources within organization (barrier)</b>                                  |                      |
| Concern about capacity to recover costs of incorporating CBT into practice                        | Nielsen (2014) [45]  |
| Treatments (e.g. physiotherapy) prescribed less frequently due to decreasing financial resources  | Rosemann (2006) [48] |
| <b>Financial reward for implementing LIs (facilitator)</b>                                        |                      |
| Financial incentivisation                                                                         | Egerton (2017) [32]  |
| Payment system has to be changed to upgrade conservative treatments and conversation with patient | Rosemann (2006) [48] |
| Interventions performed by practice nurses have to be reinsured sufficiently                      | Rosemann (2006) [48] |
| Working according to the protocol should be financially rewarded (*)                              | De Rooij (2020) [60] |

### *Information resources*

| <b>Description</b>                                                         | <b>Reference</b>     |
|----------------------------------------------------------------------------|----------------------|
| <b>Lack of information resources (barrier)</b>                             |                      |
| Absence of clear guidelines for weight loss                                | Allison (2019) [27]  |
| Lack of information about scheme hindered referral                         | Law (2019) [37]      |
| Lack of resources for face-to-face patient education and patient reference | Miller (2020) [44]   |
| Lack of information about self-help groups/offers on community level       | Rosemann (2006) [48] |
| Missing information about offers e.g. in the community                     | Rosemann (2006) [48] |
| <b>Challenges in accessing information resources (barrier)</b>             |                      |
| Challenges in accessing scientific papers                                  | MacKay (2018) [41]   |
| Difficulty finding high quality, patient-friendly OA educational materials | Miller (2020) [44]   |



1  
2  
3  
4  
5  
6  
7  
8  
9  
10  
11  
12  
13  
14  
15  
16  
17  
18  
19  
20  
21  
22  
23  
24  
25  
26  
27  
28  
29  
30  
31  
32  
33  
34  
35  
36  
37  
38  
39  
40  
41  
42  
43  
44  
45  
46

|                                                                                                     |                      |
|-----------------------------------------------------------------------------------------------------|----------------------|
| Frustration that material found on Internet or provided by friends/family was frequently inaccurate | Miller (2020) [44]   |
| Cannot access necessary resources (*)                                                               | Cottrell (2016) [53] |
| <b>Availability of information resources (facilitator)</b>                                          |                      |
| Clear preference for concrete guidelines or tools for engaging in weight management                 | Allison (2019) [27]  |
| Recommending informational materials for patients (to mitigate delays in OA care)                   | Miller (2020) [44]   |
| Standardised flowsheet on OA management (as guide for providers/tool for patient discussions)       | Miller (2020) [44]   |
| Specific information about program (suggestion for promotion and referrals)                         | Wallis (2020) [52]   |
| Clear referral criteria/guideline (*)                                                               | Hofstede (2016) [57] |
| <b>Access to information resources (facilitator)</b>                                                |                      |
| Having access to customizable, printable patient resources                                          | Egerton (2018) [33]  |
| Access to current evidence                                                                          | MacKay (2018) [41]   |
| Professional networks/community of practice as mechanism to facilitate sharing of information       | MacKay (2018) [41]   |
| Integrating scientific evidence from studies into their approach to management                      | MacKay (2020) [42]   |
| Including links on websites of partners (suggestion for promotion and referrals)                    | Wallis (2020) [52]   |

*Facilities*

| Description                                                                                 | Reference           |
|---------------------------------------------------------------------------------------------|---------------------|
| <b>Negative attitude toward information technology (barrier)</b>                            |                     |
| Sceptical about benefit of clinical practice information technology                         | Egerton (2018) [33] |
| <b>Potential use of information technology (facilitator)</b>                                |                     |
| Changes to clinical practice information technology (e.g. prompts into clinic software)     | Egerton (2018) [33] |
| Having patient resources embedded within current practice software or routines              | Egerton (2018) [33] |
| Electronic reminders for physicians on how to locate OA treatment information and resources | Miller (2020) [44]  |
| <b>Benefits of working in health centers (facilitator)</b>                                  |                     |
| Collaboration among multiple disciplines could be facilitated by working in a health center | Selten (2017) [49]  |

Domain 6: Capacity for organizational change

*Professional paradigm*

| Description                                                                                                 | Reference           |
|-------------------------------------------------------------------------------------------------------------|---------------------|
| <b>Adequate professional paradigm or suggestions for expansion (facilitator)</b>                            |                     |
| Nature of the physical therapy paradigm (in relation to weight management)                                  | Allison (2019) [27] |
| Physical therapy scope of practice was adequate to manage clients with perceived early knee OA              | MacKay (2018) [41]  |
| Suggestion that it would be useful to expand scope of practice to include ordering diagnostic imaging       | MacKay (2018) [41]  |
| Value of increasing profession’s explicit understanding/use of PCST skills (practice model may be required) | Nielsen (2014) [45] |

|                                                                                                                 |                     |
|-----------------------------------------------------------------------------------------------------------------|---------------------|
| Value of incorporating aspects of PCST mind-set into professional training (entry-level vs. postgraduate level) | Nielsen (2014) [45] |
|-----------------------------------------------------------------------------------------------------------------|---------------------|

### *Monitoring*

| Description                                       | Reference            |
|---------------------------------------------------|----------------------|
| Audit (facilitator)                               |                      |
| Peer review/audit of professional association (*) | Hofstede (2016) [57] |

### *Support within the organization*

| Description                                                                                                                              | Reference            |
|------------------------------------------------------------------------------------------------------------------------------------------|----------------------|
| Management not supportive (barrier)                                                                                                      |                      |
| The management of my practice is not/might not be collaborative regarding the application of the protocol in daily clinical practice (*) | De Rooij (2020) [60] |

### Domain 7: Social, political, and legal factors

#### *Healthcare system*

| Description                                                                                                            | Reference            |
|------------------------------------------------------------------------------------------------------------------------|----------------------|
| Restrictions due to health insurance (barrier)                                                                         |                      |
| Lack of funding prevented clients from accessing services/seeking help/getting full course of treatment                | MacKay (2018) [41]   |
| Treatments (e.g. physiotherapy) prescribed less frequently due to increasing restrictions by health insurances         | Rosemann (2006) [48] |
| The number of treatments that the patient receives from their insurance company is a barrier in using the protocol (*) | De Rooij (2020) [60] |
| Number of treatment sessions patients receive from insurance companies restricted application of the strategy          | De Rooij (2020) [60] |
| Benefits of good health insurance (facilitator)                                                                        |                      |
| Patients who are well insured have improved access to services (e.g. physical therapy)                                 | Miller (2020) [44]   |
| Positivity toward private sector (patients will get seen a lot quicker)                                                | Okwera (2019) [46]   |
| Private healthcare supplementation (as suggestion for physiotherapy service improvement)                               | Okwera (2019) [46]   |
| In complex patients insurance companies should reimburse more treatment sessions                                       | De Rooij (2020) [60] |
| Government subsidies (facilitator)                                                                                     |                      |
| Government-subsidised allied health visits to facilitate utilisation of services that support exercise/weight loss     | Egerton (2018) [33]  |

### Domain 8: Patient and HCP interactions

#### *Therapeutic alliance*

| Description | Reference |
|-------------|-----------|
|-------------|-----------|

|                                                                                               |                      |
|-----------------------------------------------------------------------------------------------|----------------------|
| <b>Potential negative influence of implementing LIs to relationship (barrier)</b>             |                      |
| Feelings of guilt when referring to LMP (dooming patients to a longer wait for surgery)       | Law (2019) [37]      |
| <b>Importance of communication and relationship (facilitator)</b>                             |                      |
| Strong therapeutic relationship with patients                                                 | Lawford (2020) [39]  |
| Having positive attitude/being encouraging of small changes/being hopeful about OA management | MacKay (2020) [42]   |
| More openly address psychological complaints of patients                                      | Rosemann (2006) [48] |
| Good communication with patient may help in delaying surgery                                  | Selten (2017) [49]   |
| Importance of having trust                                                                    | Selten (2017) [49]   |

### *Lifestyle as conversation topic*

| <b>Description</b>                                                                                                 | <b>Reference</b>    |
|--------------------------------------------------------------------------------------------------------------------|---------------------|
| <b>Challenges of discussing weight (barrier)</b>                                                                   |                     |
| Perceived impact of own weight during weight discussions (not being overweight)                                    | Allison (2019) [27] |
| Apparent discomfort with having conversations about weight                                                         | Allison (2019) [27] |
| Concern about how weight conversations might threaten patient rapport                                              | Allison (2019) [27] |
| Weight loss is sensitive topic (afraid of upsetting their patients results in temptation to avoid discussion)      | Egerton (2018) [33] |
| Weight was touchy/sensitive subject to discuss                                                                     | MacKay (2020) [42]  |
| Difficulties in communicating with patients about being overweight                                                 | Selten (2017) [49]  |
| Viewing weight as sensitive subject/feeling uncomfortable discussing it                                            | Tang (2020) [50]    |
| <b>Factors that could ease the way to discussing weight (facilitator)</b>                                          |                     |
| Perceived impact of own weight during weight discussions (being overweight)                                        | Allison (2019) [27] |
| Feeling comfortable discussing role of physical activity in maintaining weight control                             | MacKay (2020) [42]  |
| Developing rapport with people made it easier to discuss weight management                                         | MacKay (2020) [42]  |
| Reframe discussions around exercise and weight loss (e.g. not blaming/discouraging people)                         | Miller (2020) [44]  |
| Relationship with patients, developed through numerous sessions, facilitated influence for lifestyle modifications | Poitras (2010) [47] |
| Having a relationship with patient built on mutual trust/respect would ease way to discussing weight reduction     | Selten (2017) [49]  |

### Domain 9: Disease factors

#### *Image*

| <b>Description</b>                                                                        | <b>Reference</b>         |
|-------------------------------------------------------------------------------------------|--------------------------|
| <b>OA seen as low priority (barrier)</b>                                                  |                          |
| Assigning low priority to OA as disease                                                   | Christiansen (2020) [29] |
| Concern about providing this service for a condition perceived as low priority            | Egerton (2017) [32]      |
| OA was not given enough attention, symptoms were often dismissed/minimized in health care | Mann (2011) [43]         |

|    |                                                                                                                   |                      |
|----|-------------------------------------------------------------------------------------------------------------------|----------------------|
| 1  | Medical professionals saw OA as low priority with respect to managing their workload                              | Okwera (2019) [46]   |
| 2  | Knee OA more often diagnosed as an unanticipated comorbidity (rarely primary reason for consultation)             | Poitras (2010) [47]  |
| 3  | Not enough emphasis put on primary prevention of knee OA                                                          | Poitras (2010) [47]  |
| 4  | Knee OA management seen as unchallenging routine                                                                  | Poitras (2010) [47]  |
| 5  | Belief that nobody is willing to change lifestyle due to OA, disease has to be a lot worse                        | Rosemann (2006) [48] |
| 6  | OA seen as untreatable and local condition (wear-and-tear) (barrier)                                              |                      |
| 7  | Describing OA as simply a problem of cartilage degeneration/joint space narrowing (on x-ray)/wear and tear        | Egerton (2018) [33]  |
| 8  | Belief that symptoms will progress, and that surgery is inevitable                                                | Egerton (2018) [33]  |
| 9  | Assumption that patients would have negative connotations associated with the label knee OA                       | Egerton (2018) [33]  |
| 10 | No effective treatment options                                                                                    | Miller (2020) [44]   |
| 11 | Incurable nature and negative prognosis of OA                                                                     | Okwera (2019) [46]   |
| 12 | Knee OA seen as uninteresting health problem on which they had limited impact and could not cure                  | Poitras (2010) [47]  |
| 13 | Knee OA was perceived as a degenerative (wear and tear)                                                           | Teo (2020) [51]      |
| 14 | Using negative language to describe OA (wear-and-tear/joint damage/bone-on-bone/degenerative condition)           | Wallis (2020) [52]   |
| 15 | Biomedical perspective on knee OA, attributing signs and symptoms to local knee pathology or wear and tear        | Holden (2009) [61]   |
| 16 | OA seen as chronic degenerative condition that would progressively worsen over time (only cure being surgery)     | Holden (2009) [61]   |
| 17 | Optimistic views toward OA (facilitator)                                                                          |                      |
| 18 | Belief that knee OA is condition that can be successfully managed                                                 | Egerton (2018) [33]  |
| 19 | Importance of conveying to patients that diagnosis is not all negative/delivering a relatively positive prognosis | Egerton (2018) [33]  |
| 20 | Knee OA seen as technically challenging condition                                                                 | Poitras (2010) [47]  |

#### Supplemental File 4. Full overview of all extracted factors per article

##### Explanation

- In the tables below, all extracted factors per included article are presented. The number in brackets ('[...]') displayed after each article corresponds to the reference number used in the main text of the manuscript.

- Column "Number": the capital letter and color used refer to barriers (B/red), facilitators (F/green) or unclear factors (U/orange).

- Column "Description": (\*) at the end of the description indicates that the factor is derived from a close-ended question or attitude statement.

- Column "Subcategory (domain)": the relevant subcategory is displayed first, followed by the number of the domain to which this subcategory belongs. The domain numbers refer to the domains as described in the main text of the manuscript: (1) intervention factors; (2) individual HCP factors; (3) patient factors; (4) professional interactions; (5) incentives and resources; (6) capacity for organizational change; (7) social, political, and legal factors; (8) patient and HCP interactions; (9) disease factors.

- Abbreviations: ACSM: American College of Sports Medicine; BMI: body mass index; CBT: cognitive behavioral therapy; CKP: chronic knee pain; CPG: clinical practice guideline; GP: general practitioner; HCP: healthcare professional; LI: lifestyle intervention; LMP: Lifestyle Management Programme; NSAID: non-steroidal anti-inflammatory drug; NWBE: non-weight bearing quadriceps strengthening exercise; OA: osteoarthritis; PCST: pain coping skills training; PT: physiotherapist; RCT: randomized controlled trial; TKA: total knee arthroplasty; TJA: total joint arthroplasty; WBE: weight bearing functional exercise.

##### Allison (2019) [27]

| Number | Description                                                                                   | Subcategory (domain)                                                                             |
|--------|-----------------------------------------------------------------------------------------------|--------------------------------------------------------------------------------------------------|
| B1     | Cautious not to encroach on other HCPs' territory                                             | Non-optimal interdisciplinary collaboration or healthcare provision (4)                          |
| B2     | Lack of knowledge around appropriate interventions for weight loss                            | Lack of knowledge or skills around LIs or promoting behavioral change (2)                        |
| B3     | Uncertainty about how to enact their understanding of relationship between weight and knee OA | Lack of knowledge or skills around LIs or promoting behavioral change (2)                        |
| B4     | Absence of clear guidelines for weight loss                                                   | Lack of information resources (5)                                                                |
| B5     | Perceived impact of own weight during weight discussions (not being overweight)               | Challenges of discussing weight (8)                                                              |
| B6     | Apparent discomfort with having conversations about weight                                    | Challenges of discussing weight (8)                                                              |
| B7     | Concern about how weight conversations might threaten patient rapport                         | Challenges of discussing weight (8)                                                              |
| F1     | Nature of the physical therapy paradigm (in relation to weight management)                    | Adequate professional paradigm or suggestions for expansion (6)                                  |
| F2     | Perceived status of physical therapists within health care team and wider community           | Good interdisciplinary collaboration or healthcare provision, or suggestions for improvement (4) |
| F3     | Perceived professional responsibility to adhere to evidence-based guideline                   | Positive attitude toward guidelines or protocols (2)                                             |
| F4     | Clear preference for concrete guidelines or tools for engaging in weight management           | Availability of information resources (5)                                                        |

|    |                                                                             |                                                          |
|----|-----------------------------------------------------------------------------|----------------------------------------------------------|
| F5 | Perceived impact of own weight during weight discussions (being overweight) | Factors that could ease the way to discussing weight (8) |
|----|-----------------------------------------------------------------------------|----------------------------------------------------------|

Bossen (2016) [28]

| Number | Description                                                                                                       | Subcategory (domain)                                                                    |
|--------|-------------------------------------------------------------------------------------------------------------------|-----------------------------------------------------------------------------------------|
| B1     | Lack of financial incentive if blended intervention substitutes conventional visits (reduced venues per patient)  | Other challenges for HCPs regarding feasibility of telehealth (1)                       |
| B2     | Most of the patients prefer traditional face-to-face treatments                                                   | Patient-related challenges regarding feasibility of telehealth (1)                      |
| B3     | Most of the patients did not meet study inclusion criteria                                                        | LIs are unavailable or inaccessible (1)                                                 |
| B4     | e-Exercise must be adapted for suitable integration into practice (e.g. no insight into modules patients receive) | Challenges for HCPs during delivery of LIs (1)                                          |
| F1     | 24/7 availability of information and exercises                                                                    | Patient-related benefits regarding feasibility of telehealth (1)                        |
| F2     | Possibility to extend physical therapy treatment in patient's home environment                                    | Benefits of telehealth in terms of effectiveness (1)                                    |
| F3     | Potential to enhance the adherence of home exercises                                                              | Benefits of telehealth in terms of effectiveness (1)                                    |
| F4     | Positive feedback regarding the content of e-Exercise                                                             | Positive experiences with or suggestions to improve the content or structure of LIs (1) |

Christiansen (2020) [29]

| Number | Description                                                                                                        | Subcategory (domain)                                                             |
|--------|--------------------------------------------------------------------------------------------------------------------|----------------------------------------------------------------------------------|
| B1     | Assigning low priority to OA as disease                                                                            | OA seen as low priority (9)                                                      |
| B2     | Assigning low priority to exercise as treatment                                                                    | Negative attitude toward LIs (2)                                                 |
| B3     | Difficulty with managing multiple conditions/tendency to prioritize other conditions over OA                       | Negative impact of comorbidities (3)                                             |
| B4     | Not certain that exercise works                                                                                    | LIs have little or no effect on OA (1)                                           |
| B5     | Referring patients to other health care providers and for other treatments rather than recommending exercise       | Perception of own role potentially impeding prescription or follow-up of LIs (2) |
| B6     | Limited knowledge of exercise prescription (uncertainty of what exercise to recommend/how much)                    | Lack of knowledge or skills around LIs or promoting behavioral change (2)        |
| B7     | Referring patients to those with specialized knowledge rather than treating themselves (outside scope of practice) | Perception of own role potentially impeding prescription or follow-up of LIs (2) |
| B8     | Not received sufficient training on exercise/lack of education                                                     | Lack of knowledge or skills around LIs or promoting behavioral change (2)        |
| B9     | Patients' lack of motivation to exercise/patients want passive treatment approach or quick fix                     | Negative attitude toward LIs (3)                                                 |

Davis (2018) [30]

| Number | Description | Subcategory (domain) |
|--------|-------------|----------------------|
|--------|-------------|----------------------|

|    |                                                                                                    |                                                                                         |
|----|----------------------------------------------------------------------------------------------------|-----------------------------------------------------------------------------------------|
| B1 | Class required intense supervision, which was difficult to provide when most participants were new | Challenges for HCPs during delivery of LIs (1)                                          |
| B2 | Challenges of supervision when space did not allow clear line of sight                             | Challenges for HCPs during delivery of LIs (1)                                          |
| F1 | Enthusiastic about the program and described the results (e.g. it was empowering)                  | LIs have positive mental effects (1)                                                    |
| F2 | Initial classes needed to be small with rolling recruitment very beneficial                        | Ease for HCPs during delivery of LIs (1)                                                |
| F3 | First education session was critical to reducing the participant's anxiety related to exercising   | Positive experiences with or suggestions to improve the content or structure of LIs (1) |
| F4 | Importance of empowering the patients rather than 'pushing' them, achieved by 'giving choices'     | Positive experiences with or suggestions to improve the content or structure of LIs (1) |
| F5 | Exercise progression was most effective when the participant requested progression                 | Importance of high patient adherence or engagement for effectiveness of LIs (3)         |

### De Rooij (2014) [31]

| Number | Description                                                                                                           | Subcategory (domain)                                                |
|--------|-----------------------------------------------------------------------------------------------------------------------|---------------------------------------------------------------------|
| F1     | Protocols offered guidance in setting up treatment/making clinical decisions/adapting treatment to comorbidity        | Available resources might improve knowledge and decision-making (2) |
| F2     | List of restrictions for exercise therapy was conveniently arranged checklist for diagnostic and treatment phases     | Ease for HCPs during delivery of LIs (1)                            |
| F3     | List of restrictions was helpful in process of clinical decision making                                               | Available resources might improve knowledge and decision-making (2) |
| F4     | Suggestion to increase feasibility by reducing the protocols to three main protocols                                  | Ease for HCPs during delivery of LIs (1)                            |
| F5     | Less afraid to increase training intensity (preventing adverse events by tailoring programs to individual's capacity) | Research environment or protocols provide a safety net (1)          |

### Egerton (2017) [32]

| Number | Description                                                                                                    | Subcategory (domain)                                      |
|--------|----------------------------------------------------------------------------------------------------------------|-----------------------------------------------------------|
| B1     | Concern that uptake would be negatively impacted if patients were required to pay                              | Costs of LIs to patients (1)                              |
| B2     | Concern for overcomplicated system when service is not compatible/complementary with existing initiatives      | LIs are not feasible or sustainable (1)                   |
| B3     | Not seeing need (already adequate skills/resources to support OA patient self-management and lifestyle change) | LIs are not feasible or sustainable (1)                   |
| B4     | Concern about providing this service for a condition perceived as low priority                                 | OA seen as low priority (9)                               |
| B5     | Not seeing need (advice already given at their practice would be unhelpfully repeated)                         | LIs are not feasible or sustainable (1)                   |
| B6     | Remote (telephone) delivery is not as good as face-to-face particularly in relation to exercise advice         | Disadvantages of telehealth in terms of effectiveness (1) |
| B7     | Advice to exercise and lose weight does not work                                                               | LIs have little or no effect on OA (1)                    |

|     |                                                                                                                |                                                                                                  |
|-----|----------------------------------------------------------------------------------------------------------------|--------------------------------------------------------------------------------------------------|
| B8  | Hesitancy to embrace an unfamiliar new service                                                                 | Other challenges for HCPs regarding feasibility of telehealth (1)                                |
| B9  | Concern regarding long-term service sustainability                                                             | LIs are not feasible or sustainable (1)                                                          |
| B10 | Concerns about security of patient data and information confidentiality during the referral process            | Telehealth is not safe for patients or patient/data privacy (1)                                  |
| B11 | Job satisfaction may be diminished when handing over care of their patients to third party with no involvement | Negative consequences for own role when referring patients to LIs (2)                            |
| B12 | The addition of a care support team may add complexities to management                                         | LIs are not feasible or sustainable (1)                                                          |
| B13 | The addition of a care support team may increase paperwork                                                     | Lack of time due to other demands (or not further specified) (5)                                 |
| B14 | The addition of a care support team may lead them feeling disconnected with their patient's care               | Negative consequences for own role when referring patients to LIs (2)                            |
| B15 | Potential for confusion about the treatment plan                                                               | Non-optimal interdisciplinary collaboration or healthcare provision (4)                          |
| B16 | Potential for issues resulting from incongruence of patient advice and information                             | Non-optimal interdisciplinary collaboration or healthcare provision (4)                          |
| B17 | Concerned the service would not be able to provide individualized management for a very diverse population     | Insufficient ability to provide personalized treatment within LIs (1)                            |
| B18 | Hearing and cognitive difficulties as barriers for some patients to being able to interact with the service    | Patient-related challenges regarding feasibility of telehealth (1)                               |
| B19 | Level of disease severity (i.e. whether people with very mild or very severe joint disease would benefit)      | Severity of disease and symptoms (3)                                                             |
| B20 | Inability of a remote service to provide locally relevant information                                          | Disadvantages of telehealth in terms of effectiveness (1)                                        |
| B21 | Skepticism about whether many patients would embrace such a model (i.e. because of remote-delivery aspect)     | Patient-related challenges regarding feasibility of telehealth (1)                               |
| F1  | More likely to engage with the care support team if it enabled more affordable/accessible allied health        | LIs are available or accessible, or suggestions for improvement (1)                              |
| F2  | Need to ensure referral procedures are streamlined in order to minimize impact on their busy schedules         | Needs regarding communication and referral procedures (4)                                        |
| F3  | Need for effective, useful and timely channels of communication between the GP and the care support team       | Needs regarding communication and referral procedures (4)                                        |
| F4  | GPs wanted to be updated on the advice given and plan made so they know what has been said to their patient    | Improving communication between HCPs (4)                                                         |
| F5  | Need for clarity about how the new service would integrate with existing schemes and payment structures        | LIs are feasible or sustainable (1)                                                              |
| F6  | Seeing need (advice/recommendations may need to be reinforced/provided over several health care episodes)      | LIs are feasible or sustainable (1)                                                              |
| F7  | Seeing need (extra time and encouragement for the patient would result in better outcomes)                     | LIs are feasible or sustainable (1)                                                              |
| F8  | Potential benefit of increased access to OA specialists                                                        | Access to other HCPs (4)                                                                         |
| F9  | Importance of clearly understanding roles and functions of service, care support team, and themselves          | Good interdisciplinary collaboration or healthcare provision, or suggestions for improvement (4) |



|     |                                                                                                                  |                                                                                                  |
|-----|------------------------------------------------------------------------------------------------------------------|--------------------------------------------------------------------------------------------------|
| F10 | Importance of broad acceptance (patients/doctors/health service funders) if new service is to continue long term | LIs are feasible or sustainable (1)                                                              |
| F11 | Importance of having confidence in (the skills of) the staff of a new service to deliver on promises             | Good interdisciplinary collaboration or healthcare provision, or suggestions for improvement (4) |
| F12 | Having a personal relationship with the people providing the service/a desire to work closely with service staff | Good interdisciplinary collaboration or healthcare provision, or suggestions for improvement (4) |
| F13 | Idea of having some of the burden of managing this patient group (e.g. time) taken away appealing                | Adequate duration of specific interventions or protocols (5)                                     |
| F14 | Some appeal for a lessening of their own responsibility in terms of managing this condition                      | Positive consequences for own role when referring patients to LIs (2)                            |
| F15 | Service could increase access to support for rural patients                                                      | Patient-related benefits regarding feasibility of telehealth (1)                                 |
| F16 | Financial incentivisation                                                                                        | Financial reward for implementing LIs (5)                                                        |

Egerton (2018) [33]

| Number | Description                                                                                                    | Subcategory (domain)                                                      |
|--------|----------------------------------------------------------------------------------------------------------------|---------------------------------------------------------------------------|
| B1     | Describing OA as simply a problem of cartilage degeneration/joint space narrowing (on x-ray)/wear and tear     | OA seen as untreatable and local condition (wear-and-tear) (9)            |
| B2     | Belief that symptoms will progress, and that surgery is inevitable                                             | OA seen as untreatable and local condition (wear-and-tear) (9)            |
| B3     | Knowledge of exercise and weight-loss treatments is sometimes inaccurate or inadequate                         | Lack of knowledge or skills around LIs or promoting behavioral change (2) |
| B4     | Dubious about effect of exercise and weight-management advice on reducing symptoms                             | LIs have little or no effect on OA (1)                                    |
| B5     | Reduced confidence with providing suitable exercise and weight loss advice                                     | Lack of knowledge or skills around LIs or promoting behavioral change (2) |
| B6     | Lack of skills in promoting readiness and motivation for lifestyle treatments                                  | Lack of knowledge or skills around LIs or promoting behavioral change (2) |
| B7     | Time pressure (unable to individualise weight management/develop exercise plans within appointment time)       | Lack of time within patient consultations (5)                             |
| B8     | Concerns regarding financial cost to patients when considering referral to other services                      | Costs of LIs to patients (1)                                              |
| B9     | Lack of availability of support services (e.g. community-based rehabilitation programs) in remote locations    | LIs are unavailable or inaccessible (1)                                   |
| B10    | Long waiting lists for support services (e.g. community-based rehabilitation programs)                         | LIs are unavailable or inaccessible (1)                                   |
| B11    | Sceptical about benefit of clinical practice information technology                                            | Negative attitude toward information technology (5)                       |
| B12    | The issue is not a lack of suitable patient resources but awareness of them                                    | Lack of knowledge or skills around specific resources (2)                 |
| B13    | Poor health literacy in chronic disease management negatively influenced discussing exercise/weight management | Low health literacy (3)                                                   |
| B14    | Patients often have own ideas on management (problematic if primarily passive treatments)                      | Negative attitude toward LIs (3)                                          |

|     |                                                                                                                       |                                                                                       |
|-----|-----------------------------------------------------------------------------------------------------------------------|---------------------------------------------------------------------------------------|
| B15 | Shifting patients' mind-sets to active participation/making lifestyle changes was challenging/time consuming          | Low patient adherence or engagement (3)                                               |
| B16 | Paternalistic approach to care (low level of engagement in providing exercise and weight management advice)           | Perception of own role potentially impeding prescription or follow-up of LIs (2)      |
| B17 | Assumption that patients would have negative connotations associated with the label knee OA                           | OA seen as untreatable and local condition (wear-and-tear) (9)                        |
| B18 | Diagnosis can foster fear-avoidance (e.g. reduced activity) due to belief activity/exercise will cause further damage | Low health literacy (3)                                                               |
| B19 | Pessimistic about patients' abilities to make lifestyle changes to address their knee OA (not capable)                | Low health literacy (3)                                                               |
| B20 | Weight loss is sensitive topic (afraid of upsetting their patients results in temptation to avoid discussion)         | Challenges of discussing weight (8)                                                   |
| F1  | Need for tailored GP education to improve confidence                                                                  | Having or improving knowledge or skills around OA care in general (2)                 |
| F2  | Importance of having highly effective communication skills                                                            | Having or improving knowledge or skills around LIs or promoting behavioral change (2) |
| F3  | Lifestyle treatments benefited other chronic conditions                                                               | LIs have positive effects on general health (1)                                       |
| F4  | Importance of longer consultations                                                                                    | Adequate duration of patient consultations (5)                                        |
| F5  | Government-subsidised allied health visits to facilitate utilisation of services that support exercise/weight loss    | Government subsidies (7)                                                              |
| F6  | Changes to clinical practice information technology (e.g. prompts into clinic software)                               | Potential use of information technology (5)                                           |
| F7  | Having access to customizable, printable patient resources                                                            | Access to information resources (5)                                                   |
| F8  | Having patient resources embedded within current practice software or routines                                        | Potential use of information technology (5)                                           |
| F9  | Patient-centred approach (high level of engagement in providing exercise and weight management advice)                | Perception of own role potentially stimulating prescription or follow-up of LIs (2)   |
| F10 | Belief that knee OA is condition that can be successfully managed                                                     | Optimistic views toward OA (9)                                                        |
| F11 | Importance of conveying to patients that diagnosis is not all negative/delivering a relatively positive prognosis     | Optimistic views toward OA (9)                                                        |
| F12 | Acknowledging that weight loss (when someone is overweight) is important                                              | Positive attitude toward LIs (2)                                                      |

### Hinman (2016) [34]

| Number | Description                                                                                                       | Subcategory (domain)                                                           |
|--------|-------------------------------------------------------------------------------------------------------------------|--------------------------------------------------------------------------------|
| B1     | Structure/timing of exercise program restricted capacity to modify exercises/provide adequate follow-up           | Non-optimal content or structure of LIs (1)                                    |
| B2     | Lack of face-to-face contact difficult/hampered ability to establish normal rapport/build effective relationships | Negative aspects regarding communication and relationship using telehealth (1) |
| B3     | Second professional not necessary to fulfill health coach role (part of own professional                          | Non-optimal interdisciplinary collaboration or healthcare provision (4)        |

1  
2  
3  
4  
5  
6  
7  
8  
9  
10  
11  
12  
13  
14  
15  
16  
17  
18  
19  
20  
21  
22  
23  
24  
25  
26  
27  
28  
29  
30  
31  
32  
33  
34  
35  
36  
37  
38  
39  
40  
41  
42  
43  
44  
45  
46

|     |                                                                                                                     |                                                                                                  |
|-----|---------------------------------------------------------------------------------------------------------------------|--------------------------------------------------------------------------------------------------|
|     | role as physical therapists)                                                                                        |                                                                                                  |
| B4  | Overlapping roles of physical therapist and coach could be source of conflict if not working from same set of goals | Non-optimal interdisciplinary collaboration or healthcare provision (4)                          |
| B5  | Reluctance from patients to talk about physical activity (physical therapist’s role, not the coach’s role)          | Negative attitude toward LIs (3)                                                                 |
| B6  | Necessary teamwork less likely if communication processes not clearly prescribed/structure not used                 | Challenges of communication and referral procedures (4)                                          |
| B7  | Necessary teamwork less likely if coach/physical therapist did not recognize/support each other’s goals             | Non-optimal interdisciplinary collaboration or healthcare provision (4)                          |
| B8  | Different views were expressed about the preferred medium of communication                                          | Challenges of communication and referral procedures (4)                                          |
| F1  | Appreciation how their participation afforded physical therapists and coaches opportunities to collaborate          | Good interdisciplinary collaboration or healthcare provision, or suggestions for improvement (4) |
| F2  | Positive impact on patients of personalized attention from coach and from advice/education they provided            | LIs have positive effects (not further specified) (1)                                            |
| F3  | Value of monitoring/encouraging patients to develop own understanding of links between exercise/pain                | Having or improving knowledge or skills around LIs or promoting behavioral change (2)            |
| F4  | Positive impact of information, education, and structured monitoring on patients’ adherence to exercise             | High patient adherence or engagement (3)                                                         |
| F5  | Requirements of treatment protocol freed therapists to notice and reflect on impact of the interventions            | Ease for HCPs during delivery of LIs (1)                                                         |
| F6  | Positive comments about the exercise regimen                                                                        | Positive experiences with or suggestions to improve the content or structure of LIs (1)          |
| F7  | Structured protocol allowed to experience different OA treatment regimen/observe and learn from impact              | Ease for HCPs during delivery of LIs (1)                                                         |
| F8  | Structure provided by protocol/structure of exercises (how patients included them into daily routine)               | Positive experiences with or suggestions to improve the content or structure of LIs (1)          |
| F9  | Importance of teamwork in delivering the integrated intervention                                                    | Good interdisciplinary collaboration or healthcare provision, or suggestions for improvement (4) |
| F10 | Reinforcement of health messages from another clinician could be valuable                                           | Good interdisciplinary collaboration or healthcare provision, or suggestions for improvement (4) |
| F11 | Having a separate coach freed therapists up to focus on other treatment aspects                                     | Good interdisciplinary collaboration or healthcare provision, or suggestions for improvement (4) |
| F12 | Communication needed to be collaborative, patient-centered and consistent for integrated care to be effective       | Improving communication between HCPs (4)                                                         |

Hinman (2017) [35]

| Number | Description | Subcategory (domain) |
|--------|-------------|----------------------|
|--------|-------------|----------------------|

|     |                                                                                                                  |                                                                                |
|-----|------------------------------------------------------------------------------------------------------------------|--------------------------------------------------------------------------------|
| B1  | Occasional technical difficulties (e.g. poor internet connection) could disrupt the flow of the consultation     | Negative aspects regarding communication and relationship using telehealth (1) |
| B2  | Patient flexibility could come at a cost to the therapist sometimes (allowed patients to reschedule last minute) | Other challenges for HCPs regarding feasibility of telehealth (1)              |
| B3  | Forced to modify usual habits/rely more on information shared by patients (instead of own physical assessment)   | Challenges for HCPs regarding lack of physical/visual contact (1)              |
| B4  | Some discomfort without hands-on assessment (no palpation of patient's knee/hands-on facilitation of exercises)  | Challenges for HCPs regarding lack of physical/visual contact (1)              |
| B5  | Skype consultations more suitable as adjunctive to usual in-clinic care (initial assessment in person preferred) | Other challenges for HCPs regarding feasibility of telehealth (1)              |
| F1  | Ease of using Skype for consultations                                                                            | Positive attitude or needs of HCPs regarding feasibility of telehealth (1)     |
| F2  | Quality of technology suitable for providing instructions/prescribing exercises/receiving instantaneous feedback | Positive attitude or needs of HCPs regarding feasibility of telehealth (1)     |
| F3  | Skype-delivered care convenient for patients (time efficiency/flexibility/access)                                | Patient-related benefits regarding feasibility of telehealth (1)               |
| F4  | Empowering effect of home environment on patient adherence with exercise program                                 | Benefits of telehealth in terms of effectiveness (1)                           |
| F5  | Home environment facilitated correct and safe exercise techniques                                                | Telehealth is safe for patients or patient/data privacy (1)                    |
| F6  | Using Skype distilled focus to most important and effective treatment elements to facilitate self-management     | Benefits of telehealth in terms of effectiveness (1)                           |
| F7  | Patients more relaxed in home environment/more receptive to the information the therapists provided              | Benefits of telehealth in terms of effectiveness (1)                           |
| F8  | Patients responded favorably to the exercises prescribed despite lack of hands-on assessment                     | Lack of physical/visual contact not a major issue for HCPs (1)                 |
| F9  | Safety net provided by research environment (e.g. patients were previously screened for comorbidities/red flags) | Research environment or protocols provide a safety net (1)                     |
| F10 | Hands-off approach was physically less demanding compared to usual care/contributed to sense of satisfaction     | Lack of physical/visual contact not a major issue for HCPs (1)                 |
| F11 | Functional improvements experienced by patients                                                                  | LIs have positive effects on affected joint(s) (1)                             |
| F12 | Functional improvements were observable using Skype                                                              | Lack of physical/visual contact not a major issue for HCPs (1)                 |
| F13 | Greater confidence to exercise among patients                                                                    | LIs have positive mental effects (1)                                           |

### Knoop (2020) [36]

| Number | Description                                                                                                        | Subcategory (domain)                                    |
|--------|--------------------------------------------------------------------------------------------------------------------|---------------------------------------------------------|
| B1     | Maximum number of four sessions was considered too low in many patients                                            | Non-optimal content or structure of LIs (1)             |
| B2     | Behavioral approach in exercise therapy and advice to visit GP were considered unnecessary for most patients       | Non-optimal content or structure of LIs (1)             |
| B3     | Interdisciplinary consult with dietician could not always take place because of problems with contacting dietician | Challenges of communication and referral procedures (4) |

|    |                                                                                                                  |                                     |
|----|------------------------------------------------------------------------------------------------------------------|-------------------------------------|
| B4 | Interdisciplinary consult with dietician could not always take place because patients refused to visit dietician | Negative attitude toward LIs (3)    |
| F1 | Model of stratified care easy to apply and having added value for daily practice                                 | LIs are feasible or sustainable (1) |
| F2 | Appreciation of applicability of treatment protocols                                                             | LIs are feasible or sustainable (1) |

Law (2019) [37]

| Number | Description                                                                                                     | Subcategory (domain)                                                                             |
|--------|-----------------------------------------------------------------------------------------------------------------|--------------------------------------------------------------------------------------------------|
| B1     | Patients' ideas about whether they wanted surgery influenced making referrals to the LMP                        | Positive attitude toward TJA (3)                                                                 |
| B2     | How well they felt the individual patient would engage with programme influenced making referrals to the LMP    | Low patient adherence or engagement (3)                                                          |
| B3     | Lack of information about scheme hindered referral                                                              | Lack of information resources (5)                                                                |
| B4     | Feelings of guilt when referring to LMP (dooming patients to a longer wait for surgery)                         | Potential negative influence of implementing LIs to relationship (8)                             |
| B5     | Lack of information and patient-professional discussion at point of referral may hinder uptake/retention of LMP | Low health literacy (3)                                                                          |
| B6     | Lack of time to monitor attendance/provide support was compounded by increasing administrative demands          | Lack of time due to other demands (or not further specified) (5)                                 |
| F1     | Multidisciplinary nature of LMP (whole-person, intensive and functional approach)                               | Positive experiences with or suggestions to improve the content or structure of LIs (1)          |
| F2     | Multidisciplinary nature of LMP (ability to utilize expertise from other professionals)                         | Good interdisciplinary collaboration or healthcare provision, or suggestions for improvement (4) |
| F3     | Suggestion to relist patients completing the programme further up the waiting list (for surgery)                | Make use of patients' preference for TJA within LIs (3)                                          |
| F4     | LMP would benefit from extension of inclusion criteria (patients with less severe OA and lower BMI)             | LIs are available or accessible, or suggestions for improvement (1)                              |
| F5     | Emphasising health benefits of programme                                                                        | LIs have positive effects (not further specified) (1)                                            |
| F6     | Reminding patients of opportunity to self-manage                                                                | LIs have positive mental effects (1)                                                             |
| F7     | Using bargaining techniques centering on implications of LMP for replacement surgery (put patient on the list)  | Make use of patients' preference for TJA within LIs (3)                                          |
| F8     | Standardization was viewed as important for monitoring and evaluation purposes                                  | Positive experiences with or suggestions to improve the content or structure of LIs (1)          |
| F9     | Flexibility was valuable when tackling local participation challenges                                           | Ability and importance of providing personalized treatment within LIs (1)                        |
| F10    | Helpful social impact of group-based programme                                                                  | Positive experiences with or suggestions to improve the content or structure of LIs (1)          |
| F11    | Further and ongoing evaluation of the LMP would help to address current challenges                              | LIs are feasible or sustainable (1)                                                              |

|    |                                          |              |
|----|------------------------------------------|--------------|
| U1 | Autonomy affects referral considerations | Autonomy (2) |
|----|------------------------------------------|--------------|

Lawford (2019) [38]

| Number | Description                                                                                                      | Subcategory (domain)                                                           |
|--------|------------------------------------------------------------------------------------------------------------------|--------------------------------------------------------------------------------|
| B1     | Telephone not viewed as primary mode of providing care (only for follow-up)                                      | Other challenges for HCPs regarding feasibility of telehealth (1)              |
| B2     | Assessment of patients could be difficult when consulting via telephone (inability to observe)                   | Challenges for HCPs regarding lack of physical/visual contact (1)              |
| B3     | Relationships with patients might be adversely impacted/could be difficult to develop rapport                    | Negative aspects regarding communication and relationship using telehealth (1) |
| B4     | Difficulties communicating might be experienced when consulting via telephone                                    | Negative aspects regarding communication and relationship using telehealth (1) |
| B5     | Lack of visual/physical contact would limit strategies available when teaching patients an exercise program      | Challenges for HCPs regarding lack of physical/visual contact (1)              |
| B6     | Some difficulty scheduling telephone consultations during usual day of face-to-face consultations                | Other challenges for HCPs regarding feasibility of telehealth (1)              |
| F1     | Telephone-delivered care would be convenient for patients                                                        | Patient-related benefits regarding feasibility of telehealth (1)               |
| F2     | Patients could be more comfortable talking about condition/engaging in exercise program from own home            | Benefits of telehealth in terms of effectiveness (1)                           |
| F3     | Telephone-delivered care could reduce patient costs associated with accessing physiotherapy services             | Patient-related benefits regarding feasibility of telehealth (1)               |
| F4     | Telephone-delivered care could provide increased opportunities to educate patients about OA                      | Benefits of telehealth in terms of effectiveness (1)                           |
| F5     | Telephone-delivered care could allow wider variety of patients to access physiotherapy                           | Patient-related benefits regarding feasibility of telehealth (1)               |
| F6     | More effective communication skills would be needed to consult via telephone                                     | Positive attitude or needs of HCPs regarding feasibility of telehealth (1)     |
| F7     | It would be necessary to provide patients with pictures or videos of each exercise when consulting via telephone | Positive attitude or needs of HCPs regarding feasibility of telehealth (1)     |
| F8     | Experiences providing telephone-delivered care exceeded expectations, resulting in new enthusiasm                | Positive attitude or needs of HCPs regarding feasibility of telehealth (1)     |
| F9     | Lack of physical and visual contact less of an issue than anticipated                                            | Lack of physical/visual contact not a major issue for HCPs (1)                 |
| F10    | Developed a strong rapport with patients over the telephone                                                      | Positive aspects regarding communication and relationship using telehealth (1) |
| F11    | Patient adherence to telephone-delivered exercise program was high                                               | Benefits of telehealth in terms of effectiveness (1)                           |
| F12    | Consulting via telephone forced to focus on effective conversations with patients (more personal level)          | Positive aspects regarding communication and relationship using telehealth (1) |
| F13    | Noticeable shift in patients' expectations of physiotherapy care (more willing to self-manage their condition)   | Patient-related benefits regarding feasibility of telehealth (1)               |
| F14    | Improvements in patient pain and function                                                                        | LIs have positive effects on affected joint(s) (1)                             |
| F15    | Increased confidence to self-manage                                                                              | LIs have positive mental effects (1)                                           |

|     |                                                                                                       |                                                                            |
|-----|-------------------------------------------------------------------------------------------------------|----------------------------------------------------------------------------|
| F16 | Telephone-delivered care was convenient for patients                                                  | Patient-related benefits regarding feasibility of telehealth (1)           |
| F17 | Able to work around the lack of visual contact (erring on the side of caution)                        | Lack of physical/visual contact not a major issue for HCPs (1)             |
| F18 | Written materials provided to patients helped to prescribe exercises effectively                      | Positive attitude or needs of HCPs regarding feasibility of telehealth (1) |
| F19 | There was a safety net in place with the trial (each patient had been screened)                       | Research environment or protocols provide a safety net (1)                 |
| F20 | Training in communication and/or health coaching important to effectively deliver care over telephone | Positive attitude or needs of HCPs regarding feasibility of telehealth (1) |

### Lawford (2020) [39]

| Number | Description                                                                                           | Subcategory (domain)                                                      |
|--------|-------------------------------------------------------------------------------------------------------|---------------------------------------------------------------------------|
| B1     | Patients were sceptical about safety and benefits of strengthening exercise for OA                    | Low health literacy (3)                                                   |
| B2     | Fear (patients required a lot of encouragement and reassurance)                                       | Low health literacy (3)                                                   |
| B3     | Being apprehensive about aggravating pain in patients                                                 | LIs are unsafe or have negative effects (1)                               |
| B4     | People that don't particularly like exercise                                                          | Negative attitude toward LIs (3)                                          |
| B5     | Mental effort required for WBE program was challenging for patients                                   | Challenges for patients during participation in LIs (1)                   |
| B6     | Tending to avoid pushing patients in usual clinical practice                                          | LIs are unsafe or have negative effects (1)                               |
| B7     | Physical challenge was the complexity of WBE program                                                  | Challenges for patients during participation in LIs (1)                   |
| B8     | Challenges associated with cuff weights used to apply resistance in NWBE program                      | Challenges for HCPs during delivery of LIs (1)                            |
| B9     | Straight leg raise challenging in NWBE program                                                        | Challenges for patients during participation in LIs (1)                   |
| B10    | Significant impact of other health problems on patients' ability to commit fully to exercise program  | Negative impact of comorbidities (3)                                      |
| F1     | Experiences in study helped them push patients through more pain than they would have previously      | Research environment or protocols provide a safety net (1)                |
| F2     | NWBE program was generally easier for patients to follow (mental effort)                              | Ease for patients during participation in LIs (1)                         |
| F3     | NWBE program was easier to prescribe (mental effort)                                                  | Ease for HCPs during delivery of LIs (1)                                  |
| F4     | Most patients tolerated a lot more than was expected (amount of exercise)                             | Severity of disease and symptoms (3)                                      |
| F5     | Easier to prescribe and progress NWBE than WBE program (physical complexity)                          | Ease for HCPs during delivery of LIs (1)                                  |
| F6     | Patients adherent/easy to work with when they engaged in exercise program/started seeing improvements | High patient adherence or engagement (3)                                  |
| F7     | Strong therapeutic relationship with patients                                                         | Importance of communication and relationship (8)                          |
| F8     | Importance of pain education and reassurance about safety and benefits of exercise                    | High health literacy or importance of education (3)                       |
| F9     | Tailoring exercise programs to individual patient would overcome some challenges                      | Ability and importance of providing personalized treatment within LIs (1) |

### Lawford (2021) [40]

| Number | Description                                                                                                   | Subcategory (domain)                                                                    |
|--------|---------------------------------------------------------------------------------------------------------------|-----------------------------------------------------------------------------------------|
| B1     | Video consultations made it more difficult to have emotional conversations/read non-verbal cues               | Negative aspects regarding communication and relationship using telehealth (1)          |
| B2     | Patients were apprehensive about managing weight by themselves                                                | Low health literacy (3)                                                                 |
| B3     | Volume of resources could be overwhelming/confusing for some patients                                         | Challenges for patients during participation in LIs (1)                                 |
| F1     | Simplicity and convenience of meal replacements                                                               | Ease for patients during participation in LIs (1)                                       |
| F2     | Video consultations were easy and convenient                                                                  | Positive attitude or needs of HCPs regarding feasibility of telehealth (1)              |
| F3     | Pleasantly surprised by experience with video consultations (had some of the best conversations)              | Positive aspects regarding communication and relationship using telehealth (1)          |
| F4     | Level of support patients had from family/people close to them seemed to make a big difference                | Social support (3)                                                                      |
| F5     | Long-term follow-up consultations would be beneficial                                                         | Positive experiences with or suggestions to improve the content or structure of LIs (1) |
| F6     | Cohort of patients, in general, was highly motivated (remained interested/motivated for entirety of 6 months) | High patient adherence or engagement (3)                                                |
| F7     | Rapid weight loss was primary driver of motivation                                                            | LIs have positive effects on general health (1)                                         |
| F8     | Extremely positive about educational resources provided                                                       | Positive experiences with or suggestions to improve the content or structure of LIs (1) |
| F9     | More information about healthy eating beyond meal replacement phase could be included                         | Positive experiences with or suggestions to improve the content or structure of LIs (1) |
| F10    | Exercise/physical activity program was an important part of intervention                                      | Positive experiences with or suggestions to improve the content or structure of LIs (1) |
| F11    | Large improvements in knee pain                                                                               | LIs have positive effects on affected joint(s) (1)                                      |
| F12    | Positive lifestyle changes (patients) (e.g. thinking differently)                                             | LIs have positive mental effects (1)                                                    |

### MacKay (2018) [41]

| Number | Description                                                                                             | Subcategory (domain)                                                      |
|--------|---------------------------------------------------------------------------------------------------------|---------------------------------------------------------------------------|
| B1     | Lack of infrastructure or local programmes (particularly in rural settings)                             | LIs are unavailable or inaccessible (1)                                   |
| B2     | Cost was a factor in whether clients could access facilities/programmes                                 | Costs of LIs to patients (1)                                              |
| B3     | Lack of funding prevented clients from accessing services/seeking help/getting full course of treatment | Restrictions due to health insurance (7)                                  |
| B4     | Clients often had a waiting period before accessing care                                                | LIs are unavailable or inaccessible (1)                                   |
| B5     | Wait lists as a burden                                                                                  | Lack of time due to other demands (or not further specified) (5)          |
| B6     | Lack of access to other healthcare providers (e.g. physicians with expertise in OA)                     | No access to other HCPs (4)                                               |
| B7     | Variability in confidence to provide weight management (not confident)                                  | Lack of knowledge or skills around LIs or promoting behavioral change (2) |



|     |                                                                                                               |                                                                                                  |
|-----|---------------------------------------------------------------------------------------------------------------|--------------------------------------------------------------------------------------------------|
| B8  | Physicians who did not make timely referrals to physical therapy                                              | Non-optimal interdisciplinary collaboration or healthcare provision (4)                          |
| B9  | Physicians' attitudes could influence clients' perceptions and level of buy-in to physical therapy            | Non-optimal interdisciplinary collaboration or healthcare provision (4)                          |
| B10 | Restricted in amount of time they could allot per patient                                                     | Lack of time within patient consultations (5)                                                    |
| B11 | Challenges in accessing scientific papers                                                                     | Challenges in accessing information resources (5)                                                |
| B12 | Challenging work to get clients to initiate management and maintain it over the long term                     | Low patient adherence or engagement (3)                                                          |
| B13 | Disconnect between PTs' recommendations for treatment and clients' expectations or preferences                | Negative attitude toward LIs (3)                                                                 |
| B14 | Prior experiences with physical therapy influenced client expectations of clinical encounter                  | Negative attitude toward LIs (3)                                                                 |
| B15 | Some clients had misconceptions about OA (nothing they could do/normalising it as part of ageing)             | Low health literacy (3)                                                                          |
| B16 | Some clients feared participation in exercise (concerns for further degeneration)                             | Low health literacy (3)                                                                          |
| B17 | Accepting diagnosis of OA could be particularly challenging for people with early OA                          | Low health literacy (3)                                                                          |
| B18 | Clients' socioeconomic status (e.g. great poverty, shelter system)                                            | Limited financial resources (3)                                                                  |
| B19 | Clients' language (e.g. haven't mastered English/French)                                                      | Low health literacy (3)                                                                          |
| B20 | Clients' family responsibilities (e.g. busy, lot going on)                                                    | Other responsibilities (3)                                                                       |
| B21 | Clients' lifestyle (e.g. coping, attitude towards pain)                                                       | Low health literacy (3)                                                                          |
| F1  | Benefits of having infrastructure and programmes available in their communities                               | LIs are available or accessible, or suggestions for improvement (1)                              |
| F2  | Access to a team on-site/a network of healthcare providers they trusted                                       | Access to other HCPs (4)                                                                         |
| F3  | Importance of good working relationships                                                                      | Good interdisciplinary collaboration or healthcare provision, or suggestions for improvement (4) |
| F4  | Importance of effective mechanisms to communicate                                                             | Needs regarding communication and referral procedures (4)                                        |
| F5  | Confident in capabilities/skills to use strategies they believed to be effective within scope of practice     | Having or improving knowledge or skills around LIs or promoting behavioral change (2)            |
| F6  | Identifying weight management as important                                                                    | Positive attitude toward LIs (2)                                                                 |
| F7  | Variability in confidence to provide weight management (confident)                                            | Having or improving knowledge or skills around LIs or promoting behavioral change (2)            |
| F8  | Treatment could improve clients' symptoms (e.g. reduce pain, increase function)                               | LIs have positive effects on affected joint(s) (1)                                               |
| F9  | Treatment could potentially slow progression of symptoms                                                      | LIs have positive effects on affected joint(s) (1)                                               |
| F10 | Physicians who expressed support for physical therapy/exercise and referred clients to physical therapy early | Good interdisciplinary collaboration or healthcare provision, or suggestions for improvement (4) |
| F11 | Physical therapy scope of practice was adequate to manage clients with perceived early knee OA                | Adequate professional paradigm or suggestions for expansion (6)                                  |
| F12 | Suggestion that it would be useful to expand scope of practice to include ordering diagnostic imaging         | Adequate professional paradigm or suggestions for expansion (6)                                  |

|     |                                                                                                   |                                                                                     |
|-----|---------------------------------------------------------------------------------------------------|-------------------------------------------------------------------------------------|
| F13 | Having adequate time to spend with clients                                                        | Adequate duration of patient consultations (5)                                      |
| F14 | Access to current evidence                                                                        | Access to information resources (5)                                                 |
| F15 | Professional networks/community of practice as mechanism to facilitate sharing of information     | Access to information resources (5)                                                 |
| F16 | Client participation in management was critical to see improvement in symptoms                    | Importance of high patient adherence or engagement for effectiveness of LIs (3)     |
| F17 | Viewing themselves as having an important role in supporting clients to participate in management | Perception of own role potentially stimulating prescription or follow-up of LIs (2) |
| F18 | Clients' pre-existing activity level (e.g. active person)                                         | Other patient characteristics (3)                                                   |
| U1  | Clients' general health                                                                           | Other patient characteristics (3)                                                   |
| U2  | Clients' occupation                                                                               | Other responsibilities (3)                                                          |

### MacKay (2020) [42]

| Number | Description                                                                                             | Subcategory (domain)                                                                  |
|--------|---------------------------------------------------------------------------------------------------------|---------------------------------------------------------------------------------------|
| B1     | Lack of confidence/uncertainty related to role in weight management                                     | Perception of own role potentially impeding prescription or follow-up of LIs (2)      |
| B2     | Weight was touchy/sensitive subject to discuss                                                          | Challenges of discussing weight (8)                                                   |
| B3     | Not confident in knowledge about weight management                                                      | Lack of knowledge or skills around LIs or promoting behavioral change (2)             |
| B4     | Perception that discussions related to diet were not part of their scope of practice                    | Perception of own role potentially impeding prescription or follow-up of LIs (2)      |
| B5     | Getting buy-in (engaging people in management) often portrayed as challenge                             | Low patient adherence or engagement (3)                                               |
| B6     | People's preferences were at odds with physical therapists' beliefs about management                    | Negative attitude toward LIs (3)                                                      |
| F1     | Clinical experience helped to read the person's situation (identify approach to motivate them)          | Having or improving knowledge or skills around LIs or promoting behavioral change (2) |
| F2     | Integrating scientific evidence from studies into their approach to management                          | Access to information resources (5)                                                   |
| F3     | Postgraduate continuing professional development courses to expand toolkit of therapeutic interventions | Having or improving knowledge or skills around LIs or promoting behavioral change (2) |
| F4     | Interventions in physical therapists' toolbox were not static (changed over time)                       | LIs are feasible or sustainable (1)                                                   |
| F5     | Perception that exercise and physical activity were central to management                               | Positive attitude toward LIs (2)                                                      |
| F6     | Acknowledging that weight management was a component of management                                      | Positive attitude toward LIs (2)                                                      |
| F7     | Confidence in addressing weight management                                                              | Having or improving knowledge or skills around LIs or promoting behavioral change (2) |
| F8     | Routinely including education about weight management                                                   | Perception of own role potentially stimulating prescription or follow-up of LIs (2)   |
| F9     | Feeling comfortable discussing role of physical activity in maintaining weight control                  | Factors that could ease the way to discussing weight (8)                              |
| F10    | Those with access to other clinicians recommended to consult another clinician for advice               | Access to other HCPs (4)                                                              |

1  
2  
3  
4  
5  
6  
7  
8  
9  
10  
11  
12  
13  
14  
15  
16  
17  
18  
19  
20  
21  
22  
23  
24  
25  
26  
27  
28  
29  
30  
31  
32  
33  
34  
35  
36  
37  
38  
39  
40  
41  
42  
43  
44  
45  
46

|     |                                                                                                                   |                                                                                     |
|-----|-------------------------------------------------------------------------------------------------------------------|-------------------------------------------------------------------------------------|
|     | on diet as needed                                                                                                 |                                                                                     |
| F11 | Developing rapport with people made it easier to discuss weight management                                        | Factors that could ease the way to discussing weight (8)                            |
| F12 | Getting buy-in (engaging people in management) critical to improving outcomes                                     | Importance of high patient adherence or engagement for effectiveness of LIs (3)     |
| F13 | Playing a role in promoting engagement in management                                                              | Perception of own role potentially stimulating prescription or follow-up of LIs (2) |
| F14 | Education contributed to buy-in to treatment (pathology, consequences, treatments)                                | High health literacy or importance of education (3)                                 |
| F15 | Tailoring treatment to a person’s goals/interests                                                                 | Ability and importance of providing personalized treatment within LIs (1)           |
| F16 | Need to consider personal context by integrating people’s home exercises into daily activities/other life demands | Ability and importance of providing personalized treatment within LIs (1)           |
| F17 | Improve people’s symptoms early in treatment (to gain buy-in)                                                     | LIs have positive effects on affected joint(s) (1)                                  |
| F18 | Having positive attitude/being encouraging of small changes/being hopeful about OA management                     | Importance of communication and relationship (8)                                    |
| U1  | Driven by their professional experience of what does and doesn’t work/trial and error                             | Clinical experience (2)                                                             |
| U2  | Treatments were based more on what works clinically (opposed to scientific evidence)                              | Clinical experience (2)                                                             |
| U3  | Treatment decisions depended on people’s symptoms/findings of physical assessment                                 | Severity of disease and symptoms (3)                                                |

Mann (2011) [43]

| Number | Description                                                                                                        | Subcategory (domain)                                                    |
|--------|--------------------------------------------------------------------------------------------------------------------|-------------------------------------------------------------------------|
| B1     | Insufficient information for OA patients (e.g. not providing leaflets)                                             | Low health literacy (3)                                                 |
| B2     | Doubts about patients’ willingness to make behavioral changes                                                      | Negative attitude toward LIs (3)                                        |
| B3     | Unrealistic expectations of the outcome of joint replacement among patients                                        | Positive attitude toward TJA (3)                                        |
| B4     | OA was not given enough attention, symptoms were often dismissed/minimized in health care                          | OA seen as low priority (9)                                             |
| B5     | Lack of provision for patients who were not candidates for surgery (too long without help)                         | Non-optimal interdisciplinary collaboration or healthcare provision (4) |
| B6     | Patients lacked proactive follow-up to support self-management                                                     | Non-optimal interdisciplinary collaboration or healthcare provision (4) |
| B7     | Lack of time to give patients sufficient opportunity to discuss their condition                                    | Lack of time within patient consultations (5)                           |
| B8     | General lack of expertise/interest in OA (that could lead to inappropriate referral/suboptimal access to services) | Lack of knowledge or skills around OA care in general (2)               |
| B9     | Lack of facilities to promote continuing exercise in community                                                     | LIs are unavailable or inaccessible (1)                                 |
| B10    | Lack of coordination between leisure, social and health services                                                   | Non-optimal interdisciplinary collaboration or healthcare provision (4) |
| B11    | Wait for physiotherapy was too long                                                                                | LIs are unavailable or inaccessible (1)                                 |
| B12    | Insufficient (physiotherapy) intervention when patients were seen                                                  | Non-optimal interdisciplinary collaboration or healthcare provision (4) |
| B13    | Belief that physiotherapists did not find it rewarding/interesting to treat OA patients                            | Non-optimal interdisciplinary collaboration or healthcare provision (4) |

|    |                                                                                                                   |                                                                                                  |
|----|-------------------------------------------------------------------------------------------------------------------|--------------------------------------------------------------------------------------------------|
| F1 | Need for early education about OA/self-management and treatment options and opportunity to discuss these          | High health literacy or importance of education (3)                                              |
| F2 | Patients would be better served by long-term condition model of care (e.g. diabetes mellitus)                     | Good interdisciplinary collaboration or healthcare provision, or suggestions for improvement (4) |
| F3 | Patients should initiate own follow-up when needed (as better use of time/health care resources)                  | Good interdisciplinary collaboration or healthcare provision, or suggestions for improvement (4) |
| F4 | Allow patients, after initial referral, to use direct access system to service (no need for re-referral)          | Good interdisciplinary collaboration or healthcare provision, or suggestions for improvement (4) |
| F5 | Care could be improved if every GP practice contained an individual who took a particular interest in OA          | Access to other HCPs (4)                                                                         |
| F6 | There should be OA specialist clinicians (all relevant allied health professions) providing services in community | Access to other HCPs (4)                                                                         |

#### Miller (2020) [44]

| Number | Description                                                                                                     | Subcategory (domain)                                           |
|--------|-----------------------------------------------------------------------------------------------------------------|----------------------------------------------------------------|
| B1     | No effective treatment options                                                                                  | OA seen as untreatable and local condition (wear-and-tear) (9) |
| B2     | Patients don't want to expend effort towards lifestyle change                                                   | Negative attitude toward LIs (3)                               |
| B3     | Lifestyle counseling is huge time commitment                                                                    | Lack of time within patient consultations (5)                  |
| B4     | Difficulty convincing patients to consider non-surgical, non-medication treatments                              | Low health literacy (3)                                        |
| B5     | Lack of physician education on OA care                                                                          | Lack of knowledge or skills around OA care in general (2)      |
| B6     | Patient body weight (overweight/obese) (impedes exercise/makes visits to services more difficult)               | Negative impact of comorbidities (3)                           |
| B7     | Costs related to weight loss can be prohibitive for patients with limited resources (financial burdens)         | Limited financial resources (3)                                |
| B8     | Lack of patient self-efficacy (regarding lifestyle changes)                                                     | Low health literacy (3)                                        |
| B9     | Patients delay care until they are highly symptomatic (missing opportunities to slow disease progression)       | Severity of disease and symptoms (3)                           |
| B10    | Lack of knowledge about OA (patient barrier)                                                                    | Low health literacy (3)                                        |
| B11    | Costs to patients (lack of insurance coverage/high co-pays for specific services/time off work/travel expenses) | Costs of LIs to patients (1)                                   |
| B12    | Inaccessible treatment options within organization                                                              | LIs are unavailable or inaccessible (1)                        |
| B13    | Lack of resources for face-to-face patient education and patient reference                                      | Lack of information resources (5)                              |
| B14    | Challenges when coordinating multimodal care (including difficulties with the referral system)                  | Challenges of communication and referral procedures (4)        |
| B15    | Appointment times too short to address all of patient's issues and provide lifestyle counseling                 | Lack of time within patient consultations (5)                  |
| B16    | Difficulty finding high quality, patient-friendly OA educational materials                                      | Challenges in accessing information resources (5)              |

|     |                                                                                                             |                                                                                                  |
|-----|-------------------------------------------------------------------------------------------------------------|--------------------------------------------------------------------------------------------------|
| B17 | Frustration that material found on Internet or provided by friends/family was frequently inaccurate         | Challenges in accessing information resources (5)                                                |
| B18 | Surgical methods have the best outcomes                                                                     | LIs have little or no effect on OA (1)                                                           |
| B19 | Changing own practice style remained as barrier after OA training                                           | Perception of own role potentially impeding prescription or follow-up of LIs (2)                 |
| F1  | Importance of provider knowledge regarding OA management                                                    | Having or improving knowledge or skills around OA care in general (2)                            |
| F2  | Physical therapy helpful for patients most of the time                                                      | LIs have positive effects (not further specified) (1)                                            |
| F3  | Utilising clinic health educator who met with patients for weight loss discussions and followed up by phone | Good interdisciplinary collaboration or healthcare provision, or suggestions for improvement (4) |
| F4  | Employing a multi-pronged approach to engage patients in weight loss                                        | Good interdisciplinary collaboration or healthcare provision, or suggestions for improvement (4) |
| F5  | Patients who are well insured have improved access to services (e.g. physical therapy)                      | Benefits of good health insurance (7)                                                            |
| F6  | Physician education on OA management can affect both provider and patient attitudes                         | Having or improving knowledge or skills around OA care in general (2)                            |
| F7  | Reframe discussions around exercise and weight loss (e.g. not blaming/discouraging people)                  | Factors that could ease the way to discussing weight (8)                                         |
| F8  | Recommending informational materials for patients (to mitigate delays in OA care)                           | Availability of information resources (5)                                                        |
| F9  | Standardised flowsheet on OA management (as guide for providers/tool for patient discussions)               | Availability of information resources (5)                                                        |
| F10 | Electronic reminders for physicians on how to locate OA treatment information and resources                 | Potential use of information technology (5)                                                      |

### Nielsen (2014) [45]

| Number | Description                                                                                                         | Subcategory (domain)                                                      |
|--------|---------------------------------------------------------------------------------------------------------------------|---------------------------------------------------------------------------|
| B1     | Concerns about capacity to learn/not having skills to fulfill study expectations/deal with challenging patients     | Lack of knowledge or skills around LIs or promoting behavioral change (2) |
| B2     | Requirements of RCT potentially created a barrier to responding to where the client was                             | Insufficient ability to provide personalized treatment within LIs (1)     |
| B3     | Difficulty for patients with PCST component (cognitive restructuring techniques)                                    | Challenges for patients during participation in LIs (1)                   |
| B4     | Not have sufficient skills to present PCST component (cognitive restructuring techniques) effectively               | Lack of knowledge or skills around LIs or promoting behavioral change (2) |
| B5     | Some process skills were dissimilar to pre-existing clinical communication skills and challenging to use            | Lack of knowledge or skills around LIs or promoting behavioral change (2) |
| B6     | Time required to teach PCST skills to patients                                                                      | Lack of time within patient consultations (5)                             |
| B7     | Concern about capacity to recover costs of incorporating CBT into practice                                          | Limited financial resources within organization (5)                       |
| B8     | Lack of knowledge about CBT (necessary to participate in training/RCT to fully appreciate value of CBT to practice) | Lack of knowledge or skills around LIs or promoting behavioral change (2) |
| B9     | Public expectation of what physical therapy treatment should be (e.g. didn't come to have thinking challenged)      | Negative attitude toward LIs (3)                                          |

|     |                                                                                                                    |                                                                                         |
|-----|--------------------------------------------------------------------------------------------------------------------|-----------------------------------------------------------------------------------------|
| F1  | Training workshop as good introduction to content and process of delivering PCST program                           | Ease for HCPs during delivery of LIs (1)                                                |
| F2  | Weekly group interaction crucial to being able to deliver intervention effectively/problem-solve issues            | Ease for HCPs during delivery of LIs (1)                                                |
| F3  | Input from supervising psychologist crucial to being able to deliver intervention effectively/problem-solve issues | Ease for HCPs during delivery of LIs (1)                                                |
| F4  | Would have liked more role-playing experience prior to beginning trial treatments                                  | Ease for HCPs during delivery of LIs (1)                                                |
| F5  | Favorably comments on program content (positive way to help people be proactive about their pain)                  | Positive experiences with or suggestions to improve the content or structure of LIs (1) |
| F6  | Opportunity to review PCST skills and learn more structured/deliberate ways of incorporating these into practice   | Having or improving knowledge or skills around LIs or promoting behavioral change (2)   |
| F7  | Some modules worked better than others (depending on the individual patient and context)                           | Ability and importance of providing personalized treatment within LIs (1)               |
| F8  | Importance of PCST component (cognitive restructuring techniques)                                                  | Positive experiences with or suggestions to improve the content or structure of LIs (1) |
| F9  | Structure of PCST sessions (overview/practice review/covering new skill/practice planning) worked well             | Positive experiences with or suggestions to improve the content or structure of LIs (1) |
| F10 | Regular group meetings were considered very important (if not essential) for delivery of PCST program              | Ease for HCPs during delivery of LIs (1)                                                |
| F11 | Value of having a psychologist involved throughout the program, their professional input was helpful               | Ease for HCPs during delivery of LIs (1)                                                |
| F12 | Expecting to utilize/continue integrating PCST in general clinical work as physical therapist (beyond the study)   | Positive attitude toward LIs (2)                                                        |
| F13 | The belief that a more flexible approach responsive to patient needs was required in their practice                | Ability and importance of providing personalized treatment within LIs (1)               |
| F14 | Increasing confidence in using PCST skills over the course of the study                                            | Having or improving knowledge or skills around LIs or promoting behavioral change (2)   |
| F15 | Improved interpersonal skills with general clinical patients as a result of participating in the study             | Having or improving knowledge or skills around LIs or promoting behavioral change (2)   |
| F16 | Value of increasing profession's explicit understanding/use of PCST skills (practice model may be required)        | Adequate professional paradigm or suggestions for expansion (6)                         |
| F17 | Incorporating selected PCST components on as-needed basis most practical way within current environment            | Adequate duration of specific interventions or protocols (5)                            |
| F18 | Value of incorporating aspects of PCST mind-set into professional training (entry-level vs. postgraduate level)    | Adequate professional paradigm or suggestions for expansion (6)                         |

Okwera (2019) [46]

| Number | Description                                                                                                    | Subcategory (domain)                                                                             |
|--------|----------------------------------------------------------------------------------------------------------------|--------------------------------------------------------------------------------------------------|
| B1     | Incurable nature and negative prognosis of OA                                                                  | OA seen as untreatable and local condition (wear-and-tear) (9)                                   |
| B2     | Medical professionals saw OA as low priority with respect to managing their workload                           | OA seen as low priority (9)                                                                      |
| B3     | Frustrations about restrictive referral pathways                                                               | Challenges of communication and referral procedures (4)                                          |
| B4     | Frustrations about lack of autonomy with decision-making                                                       | Negative attitude toward guidelines or protocols (2)                                             |
| B5     | Only two GPs had clear understanding of clinical guidelines on OA                                              | Lack of knowledge or skills around OA care in general (2)                                        |
| B6     | Negativity toward guidelines (clinical reasoning more important)                                               | Negative attitude toward guidelines or protocols (2)                                             |
| B7     | Feeling that patients tended to prefer treatment administered to them                                          | Negative attitude toward LIs (3)                                                                 |
| B8     | Lack of compliance with home exercise regimes and advice given to patients was common                          | Low patient adherence or engagement (3)                                                          |
| B9     | Lack of confidence in clinical effectiveness of physiotherapy treatments                                       | LIs have little or no effect on OA (1)                                                           |
| B10    | Negative comments about patient reports of a lack of "hands-on" physiotherapy                                  | Negative attitude toward LIs (3)                                                                 |
| B11    | Criticizing the decision to centralize musculoskeletal physiotherapy service (useful to have somebody in team) | Non-optimal interdisciplinary collaboration or healthcare provision (4)                          |
| B12    | Frustrations about lack of continuity regarding team of physiotherapists within clinic                         | Non-optimal interdisciplinary collaboration or healthcare provision (4)                          |
| B13    | Frustrations about lack of contact/communication involved in the referral and discharge process                | Lack of communication between HCPs (4)                                                           |
| B14    | Referral process was convoluted and at times irrelevant                                                        | Challenges of communication and referral procedures (4)                                          |
| B15    | Not working closely with physiotherapists/frustrations about working relationship                              | Non-optimal interdisciplinary collaboration or healthcare provision (4)                          |
| B16    | Dissatisfaction about loss of communication since centralizing musculoskeletal physiotherapy service           | Lack of communication between HCPs (4)                                                           |
| B17    | Dissatisfaction about loss of coherent working since centralizing musculoskeletal physiotherapy service        | Non-optimal interdisciplinary collaboration or healthcare provision (4)                          |
| F1     | There is place for each (self-management programs/physiotherapy/orthopedic consultants) in OA management       | Positive attitude toward LIs (2)                                                                 |
| F2     | Positivity toward private sector (patients will get seen a lot quicker)                                        | Benefits of good health insurance (7)                                                            |
| F3     | Reasonable understanding of role physiotherapy plays in management of lower-limb OA                            | Having or improving knowledge or skills around LIs or promoting behavioral change (2)            |
| F4     | Overall positive experience of physiotherapy service and therapists                                            | Good interdisciplinary collaboration or healthcare provision, or suggestions for improvement (4) |
| F5     | Need for improving communication (quality of referrals, information at discharge)                              | Improving communication between HCPs (4)                                                         |
| F6     | In-house physiotherapy (as suggestion for physiotherapy service improvement)                                   | Access to other HCPs (4)                                                                         |
| F7     | Streamlining the physiotherapy referral process (as suggestion for physiotherapy service improvement)          | Needs regarding communication and referral procedures (4)                                        |
| F8     | Training sessions (as suggestion for physiotherapy service improvement)                                        | Having or improving knowledge or skills around OA care in general (2)                            |
| F9     | Triage service (as suggestion for physiotherapy service improvement)                                           | LIs are available or accessible, or suggestions for improvement (1)                              |
| F10    | Private healthcare supplementation (as suggestion for physiotherapy service improvement)                       | Benefits of good health insurance (7)                                                            |

|     |                                                                                         |                                                                     |
|-----|-----------------------------------------------------------------------------------------|---------------------------------------------------------------------|
| F11 | A web-based physiotherapy service (as suggestion for physiotherapy service improvement) | LIs are available or accessible, or suggestions for improvement (1) |
| F12 | Reduced waiting times (as suggestion for physiotherapy service improvement)             | LIs are available or accessible, or suggestions for improvement (1) |
| U1  | Management strategies depended on what the person wants                                 | Patients' preferences (3)                                           |
| U2  | Management strategies depended on what the person can cope with                         | Health literacy (3)                                                 |
| U3  | Management strategies depended on how bad the knee is                                   | Severity of disease and symptoms (3)                                |

Poitras (2010) [47]

| Number | Description                                                                                                  | Subcategory (domain)                                                             |
|--------|--------------------------------------------------------------------------------------------------------------|----------------------------------------------------------------------------------|
| B1     | Knee OA seen as uninteresting health problem on which they had limited impact and could not cure             | OA seen as untreatable and local condition (wear-and-tear) (9)                   |
| B2     | Knee OA more often diagnosed as an unanticipated comorbidity (rarely primary reason for consultation)        | OA seen as low priority (9)                                                      |
| B3     | Not enough emphasis put on primary prevention of knee OA                                                     | OA seen as low priority (9)                                                      |
| B4     | Most GPs believed their contribution was essentially limited to diagnosis of condition and medication        | Perception of own role potentially impeding prescription or follow-up of LIs (2) |
| B5     | Knee OA management seen as unchallenging routine                                                             | OA seen as low priority (9)                                                      |
| B6     | Rehabilitation potential depended on length of disability (less potential with late management)              | Severity of disease and symptoms (3)                                             |
| B7     | Benefits obtained in the long term, which often conflicted with patient expectations for short-term benefits | Negative attitude toward LIs (3)                                                 |
| B8     | Paracetamol could mask pain/underlying physical problem (reducing opportunity to assess/manage problem)      | Severity of disease and symptoms (3)                                             |
| B9     | Potential further damage to the knee due to activity                                                         | LIs are unsafe or have negative effects (1)                                      |
| B10    | Difficult to obtain effective analgesia with some patients                                                   | Severity of disease and symptoms (3)                                             |
| B11    | Lack of patient motivation in remaining active despite knee OA                                               | Negative attitude toward LIs (3)                                                 |
| B12    | Person had been sedentary throughout life                                                                    | Other patient characteristics (3)                                                |
| B13    | Potential to create unrealistic expectations and discouragement in patients that were too disabled           | Severity of disease and symptoms (3)                                             |
| B14    | Patient views and expectations rarely matched patient needs                                                  | Negative attitude toward LIs (3)                                                 |
| B15    | Questioning capacity to perform regular exercise because of severity of disability                           | Severity of disease and symptoms (3)                                             |
| B16    | Questioning capacity to perform regular exercise because of age                                              | Other patient characteristics (3)                                                |
| B17    | Questioning capacity to perform regular exercise because of general health                                   | Negative impact of comorbidities (3)                                             |
| B18    | Questioning capacity to perform regular exercise because of motivation                                       | Negative attitude toward LIs (3)                                                 |
| B19    | Disagreement on effective exercise parameters                                                                | Non-optimal interdisciplinary collaboration or healthcare provision (4)          |
| B20    | Disagreement on optimal design of exercise programs to increase adherence                                    | Non-optimal interdisciplinary collaboration or healthcare provision (4)          |



|     |                                                                                                                 |                                                                                                  |
|-----|-----------------------------------------------------------------------------------------------------------------|--------------------------------------------------------------------------------------------------|
| B21 | Unclear on amount and type of activity necessary to obtain benefits without further damaging the knee           | Lack of knowledge or skills around LIs or promoting behavioral change (2)                        |
| B22 | Most patients demonstrated fatalism/inadequate knowledge and beliefs related to knee OA management              | Low health literacy (3)                                                                          |
| B23 | Patients' adherence to management recommendations was limited (because of fatalism)                             | Low patient adherence or engagement (3)                                                          |
| B24 | Limited impact of weight loss on established knee OA (more effective as a primary prevention strategy)          | LIs have little or no effect on OA (1)                                                           |
| B25 | Questioning direct relationship between weight and knee OA (numerous other factors associated)                  | LIs have little or no effect on OA (1)                                                           |
| B26 | Knee pain restricts activities in general (which makes weight loss difficult)                                   | Severity of disease and symptoms (3)                                                             |
| B27 | Patients with knee OA tended to be older/less active/with slower metabolism (which makes weight loss difficult) | Other patient characteristics (3)                                                                |
| B28 | Weight loss is difficult (multiplicity of factors need to be addressed, often involving change in lifestyle)    | Potential effects of LIs are difficult to accomplish (1)                                         |
| F1  | Knee OA seen as technically challenging condition                                                               | Optimistic views toward OA (9)                                                                   |
| F2  | Necessity of physiotherapy to effectively rehabilitate knee OA patients (because of knowledge/availability)     | Perception of own role potentially stimulating prescription or follow-up of LIs (2)              |
| F3  | Rehabilitation potential depended on length of disability (better outcomes with early management)               | Severity of disease and symptoms (3)                                                             |
| F4  | Many interventions should be used before resorting to medication (including physiotherapy)                      | Positive attitude toward LIs (2)                                                                 |
| F5  | Other interventions (including physiotherapy) should be used before paracetamol                                 | Positive attitude toward LIs (2)                                                                 |
| F6  | NSAIDs alone are not sufficient to appropriately treat inflammation and have to be combined with physiotherapy  | Positive attitude toward LIs (2)                                                                 |
| F7  | Importance of PT's role in educating patients with regards to NSAIDs/alternatives (including physiotherapy)     | Perception of own role potentially stimulating prescription or follow-up of LIs (2)              |
| F8  | Benefits of activity on knee mobility                                                                           | LIs have positive effects on affected joint(s) (1)                                               |
| F9  | Benefits of activity on general wellbeing                                                                       | LIs have positive effects on general health (1)                                                  |
| F10 | Effective analgesia necessary for patients to be able to accomplish activities                                  | Severity of disease and symptoms (3)                                                             |
| F11 | Patients should be encouraged to resume/maintain daily activities                                               | Positive attitude toward LIs (2)                                                                 |
| F12 | Necessity of PT involvement in managing activity (because potentially detrimental if excessive)                 | Perception of own role potentially stimulating prescription or follow-up of LIs (2)              |
| F13 | GPs believed PT involvement was necessary to motivate the patient and manage the exercise program               | Good interdisciplinary collaboration or healthcare provision, or suggestions for improvement (4) |
| F14 | Exercise planning is usually PT's role (rather than GP's)                                                       | Perception of own role potentially stimulating prescription or follow-up of LIs (2)              |
| F15 | Exercise programs have to be individualized to each patient by the PT                                           | Ability and importance of providing personalized treatment within LIs (1)                        |

|     |                                                                                                                    |                                                                                     |
|-----|--------------------------------------------------------------------------------------------------------------------|-------------------------------------------------------------------------------------|
| F16 | Necessity of PT follow-up sessions to assess and encourage patient adherence                                       | Perception of own role potentially stimulating prescription or follow-up of LIs (2) |
| F17 | Activity necessary for the knee's health                                                                           | LIs have positive effects on affected joint(s) (1)                                  |
| F18 | PT's role to individualize patients' activity according to needs and capacity                                      | Perception of own role potentially stimulating prescription or follow-up of LIs (2) |
| F19 | Necessity of patients' active participation in knee OA management (to achieve significant outcomes)                | Importance of high patient adherence or engagement for effectiveness of LIs (3)     |
| F20 | Although agreeing with active patient participation, it is ultimately PT's role to appropriately manage patients   | Perception of own role potentially stimulating prescription or follow-up of LIs (2) |
| F21 | Weight loss effective at improving mobility in general                                                             | LIs have positive effects on general health (1)                                     |
| F22 | Weight loss improves pain and joint function                                                                       | LIs have positive effects on affected joint(s) (1)                                  |
| F23 | Relationship with patients, developed through numerous sessions, facilitated influence for lifestyle modifications | Factors that could ease the way to discussing weight (8)                            |
| F24 | Weight loss also benefits mobility in general                                                                      | LIs have positive effects on general health (1)                                     |

#### Rosemann (2006) [48]

| Number | Description                                                                                                       | Subcategory (domain)                                                             |
|--------|-------------------------------------------------------------------------------------------------------------------|----------------------------------------------------------------------------------|
| B1     | Depression as important barrier to motivate patients to physical exercise                                         | Negative impact of comorbidities (3)                                             |
| B2     | Feeling pressure by patients to refer them to specialist                                                          | Positive attitude toward TJA (3)                                                 |
| B3     | Specialist did not take time to explain what they had examined/x-rays he had taken                                | Lack of communication between HCPs (4)                                           |
| B4     | Treatments (e.g. physiotherapy) prescribed less frequently due to decreasing financial resources                  | Limited financial resources within organization (5)                              |
| B5     | Treatments (e.g. physiotherapy) prescribed less frequently due to increasing restrictions by health insurances    | Restrictions due to health insurance (7)                                         |
| B6     | Not focusing on increasing patients' motivation for behavioural change, but just giving general recommendations   | Perception of own role potentially impeding prescription or follow-up of LIs (2) |
| B7     | Success rate in motivating patients too low (distinctly resigned regarding their impact on patients' life style)  | Negative attitude toward LIs (3)                                                 |
| B8     | Vicious circle (pain when exercising, people move less/eat more due to frustration/sometimes depression)          | Potential effects of LIs are difficult to accomplish (1)                         |
| B9     | Belief that nobody is willing to change lifestyle due to OA, disease has to be a lot worse                        | OA seen as low priority (9)                                                      |
| B10    | Lack of information about self-help groups/offers on community level                                              | Lack of information resources (5)                                                |
| B11    | Frustration about impact of information (e.g. self-help groups) (lot of patients find excuses not to participate) | Negative attitude toward LIs (3)                                                 |
| B12    | Missing information about offers e.g. in the community                                                            | Lack of information resources (5)                                                |
| B13    | Lack of time                                                                                                      | Lack of time due to other demands (or not further specified) (5)                 |

|     |                                                                                                             |                                                                                                  |
|-----|-------------------------------------------------------------------------------------------------------------|--------------------------------------------------------------------------------------------------|
| B14 | No knowledge about treatment                                                                                | Lack of knowledge or skills around OA care in general (2)                                        |
| F1  | Gate keeper role for GPs could reduce patients' pressure to refer to orthopaedics/decrease performed x-rays | Good interdisciplinary collaboration or healthcare provision, or suggestions for improvement (4) |
| F2  | Better communication with specialists could increase efficacy of treatment                                  | Improving communication between HCPs (4)                                                         |
| F3  | Payment system has to be changed to upgrade conservative treatments and conversation with patient           | Financial reward for implementing LIs (5)                                                        |
| F4  | Involvement of practice nurses is imaginable in the area of life style counselling and advice giving        | Good interdisciplinary collaboration or healthcare provision, or suggestions for improvement (4) |
| F5  | Interventions performed by practice nurses have to be reinsured sufficiently                                | Financial reward for implementing LIs (5)                                                        |
| F6  | Desire to be more involved in life style counselling (upgrade of profession)                                | Perception of own role potentially stimulating prescription or follow-up of LIs (2)              |
| F7  | Knowledge about treatment                                                                                   | Having or improving knowledge or skills around OA care in general (2)                            |
| F8  | Integrating patients' social system into treatment                                                          | Social support (3)                                                                               |
| F9  | More openly address psychological complaints of patients                                                    | Importance of communication and relationship (8)                                                 |

### Selten (2017) [49]

| Number | Description                                                                                            | Subcategory (domain)                                                             |
|--------|--------------------------------------------------------------------------------------------------------|----------------------------------------------------------------------------------|
| B1     | Ambivalent about patients' ability to lose weight (not able to succeed in making lifestyle changes)    | Low health literacy (3)                                                          |
| B2     | Mistrust in interventions dieticians use to help patients' with weight reduction attempts              | Non-optimal interdisciplinary collaboration or healthcare provision (4)          |
| B3     | Mentioning benefits of weight reduction, but not actively coaching or referring patients               | Perception of own role potentially impeding prescription or follow-up of LIs (2) |
| B4     | The belief that patients are not capable of losing weight                                              | Low health literacy (3)                                                          |
| B5     | Weight reduction advice takes too much time in a consultation                                          | Lack of time within patient consultations (5)                                    |
| B6     | Not perceiving weight reduction advice as their responsibility                                         | Perception of own role potentially impeding prescription or follow-up of LIs (2) |
| B7     | Difficulties in communicating with patients about being overweight                                     | Challenges of discussing weight (8)                                              |
| B8     | Uncertainties about dosage/frequency/type of physical activity                                         | Lack of knowledge or skills around LIs or promoting behavioral change (2)        |
| B9     | Less certain about effectiveness of physical therapy (benefits variable or difficult to prove)         | LIs have little or no effect on OA (1)                                           |
| B10    | Negative views about physical therapists who provided non-evidence-based treatments                    | Non-optimal interdisciplinary collaboration or healthcare provision (4)          |
| B11    | Mistrust because they observed huge differences in quality of care delivered by physical therapists    | Non-optimal interdisciplinary collaboration or healthcare provision (4)          |
| B12    | Occupational therapists, podiatrists and physical therapists do not work together optimally in OA care | Non-optimal interdisciplinary collaboration or healthcare provision (4)          |
| B13    | Role of rheumatologist in knee/hip OA care perceived as unclear/limited                                | Non-optimal interdisciplinary collaboration or healthcare provision (4)          |

|     |                                                                                                                |                                                                                                  |
|-----|----------------------------------------------------------------------------------------------------------------|--------------------------------------------------------------------------------------------------|
| B14 | Agreement that orthopedic surgeon's primary task is to assess whether patient is eligible for surgery          | Non-optimal interdisciplinary collaboration or healthcare provision (4)                          |
| B15 | Orthopedic surgeons were perceived negatively by several healthcare providers                                  | Non-optimal interdisciplinary collaboration or healthcare provision (4)                          |
| F1  | Benefits of weight reduction for relieving symptoms of knee/hip OA                                             | LIs have positive effects on affected joint(s) (1)                                               |
| F2  | Ambivalent about patients' ability to lose weight (able)                                                       | High health literacy or importance of education (3)                                              |
| F3  | Dieticians are helpful for patients trying to lose weight                                                      | Good interdisciplinary collaboration or healthcare provision, or suggestions for improvement (4) |
| F4  | Having a relationship with patient built on mutual trust/respect would ease way to discussing weight reduction | Factors that could ease the way to discussing weight (8)                                         |
| F5  | Value of lifestyle advice related to knee and hip OA                                                           | LIs have positive effects (not further specified) (1)                                            |
| F6  | Beneficial effects of physical therapy in reducing pain/stiffness and potential effects on cartilage           | LIs have positive effects on affected joint(s) (1)                                               |
| F7  | Beneficial effects of physical therapy in reducing weight and for increasing mobility/posture/coordination     | LIs have positive effects on general health (1)                                                  |
| F8  | Physical therapy useful in increasing patients self-management in coping with/acceptance of symptoms           | LIs have positive mental effects (1)                                                             |
| F9  | Need for physical therapists to provide evidence-based exercises instead of non-evidence-based modalities      | Good interdisciplinary collaboration or healthcare provision, or suggestions for improvement (4) |
| F10 | Non-pharmacological, non-surgical treatment was considered useful to delay surgery                             | LIs have positive effects (not further specified) (1)                                            |
| F11 | Good communication with patient may help in delaying surgery                                                   | Importance of communication and relationship (8)                                                 |
| F12 | Straightforward, easy and quick lines of communication among different disciplines in healthcare center        | Needs regarding communication and referral procedures (4)                                        |
| F13 | Collaboration among multiple disciplines could be facilitated by working in a health center                    | Benefits of working in health centers (5)                                                        |
| F14 | Non-pharmacological, non-surgical OA care can and should be provided in a primary care setting                 | Good interdisciplinary collaboration or healthcare provision, or suggestions for improvement (4) |
| F15 | GPs have coordinating role (diagnose/monitor, refer when necessary, lifestyle education, long-term coach)      | Good interdisciplinary collaboration or healthcare provision, or suggestions for improvement (4) |
| F16 | Importance of having trust                                                                                     | Importance of communication and relationship (8)                                                 |
| F17 | Physical therapists can guide patients/provide lifestyle advice (more time compared with GPs)                  | Good interdisciplinary collaboration or healthcare provision, or suggestions for improvement (4) |
| F18 | Perceiving rheumatologists' role as valuable (giving injections, providing lifestyle/medication advice, refer) | Good interdisciplinary collaboration or healthcare provision, or suggestions for improvement (4) |

### Tang (2020) [50]

| Number | Description                                             | Subcategory (domain)                                      |
|--------|---------------------------------------------------------|-----------------------------------------------------------|
| B1     | Inability to discuss specific details of ACSM guideline | Lack of knowledge or skills around specific resources (2) |

|     |                                                                                                                  |                                                                                       |
|-----|------------------------------------------------------------------------------------------------------------------|---------------------------------------------------------------------------------------|
| B2  | Pain (main barrier resulting in reduced dosage prescription of strengthening exercises)                          | Severity of disease and symptoms (3)                                                  |
| B3  | Patient's ability to exercise (main barrier resulting in reduced dosage prescription of strengthening exercises) | Severity of disease and symptoms (3)                                                  |
| B4  | Unaware about practice guidelines in relation to aerobic exercise prescription/weight loss/pain management       | Lack of knowledge or skills around LIs or promoting behavioral change (2)             |
| B5  | Knowledge about BMI/weight management was particularly poor (e.g. relying on visual estimations)                 | Lack of knowledge or skills around LIs or promoting behavioral change (2)             |
| B6  | Limited knowledge of how to address weight management                                                            | Lack of knowledge or skills around LIs or promoting behavioral change (2)             |
| B7  | Pain (key barrier to prescription of exercise as recommended by CPGs)                                            | Severity of disease and symptoms (3)                                                  |
| B8  | Less awareness about aerobic exercise prescription                                                               | Lack of knowledge or skills around LIs or promoting behavioral change (2)             |
| B9  | Pain (barrier to prescription of aerobic exercise)                                                               | Severity of disease and symptoms (3)                                                  |
| B10 | Uncertainty over scope of practice/questioning whether weight and pain management fall outside scope             | Perception of own role potentially impeding prescription or follow-up of LIs (2)      |
| B11 | Reduced confidence with recommending individual weight/pain management plans (discuss in general terms)          | Lack of knowledge or skills around LIs or promoting behavioral change (2)             |
| B12 | Viewing weight as sensitive subject/feeling uncomfortable discussing it                                          | Challenges of discussing weight (8)                                                   |
| F1  | Knowledge/confidence in providing treatments related to strengthening and range of motion                        | Having or improving knowledge or skills around LIs or promoting behavioral change (2) |
| F2  | Being aware about ACSM guidelines                                                                                | Available resources might improve knowledge and decision-making (2)                   |
| F3  | Confident in providing justifications for non-routinely adhering to guidelines (range of motion exercises)       | Having or improving knowledge or skills around LIs or promoting behavioral change (2) |
| F4  | Knowing the importance of weight management for knee OA                                                          | Positive attitude toward LIs (2)                                                      |
| F5  | Being able to describe how they will manage pain during strengthening exercise                                   | Having or improving knowledge or skills around LIs or promoting behavioral change (2) |

### Teo (2020) [51]

| Number | Description                                                                                         | Subcategory (domain)                                                             |
|--------|-----------------------------------------------------------------------------------------------------|----------------------------------------------------------------------------------|
| B1     | Knee OA was perceived as a degenerative (wear and tear)                                             | OA seen as untreatable and local condition (wear-and-tear) (9)                   |
| B2     | Describing own role as prepping patients for knee surgery when they were referred for physiotherapy | Perception of own role potentially impeding prescription or follow-up of LIs (2) |
| B3     | Comorbidities (often more severe pain, hampering ability to exercise or be physically active)       | Negative impact of comorbidities (3)                                             |
| B4     | Patients' unsatisfactory adherence to exercise programs                                             | Low patient adherence or engagement (3)                                          |
| B5     | Self-motivation (intrinsic barrier for patient adherence)                                           | Negative attitude toward LIs (3)                                                 |

|     |                                                                                                                 |                                                                                     |
|-----|-----------------------------------------------------------------------------------------------------------------|-------------------------------------------------------------------------------------|
| B6  | Fear of falling (intrinsic barrier for patient adherence)                                                       | Low health literacy (3)                                                             |
| B7  | Fear of pain (intrinsic barrier for patient adherence)                                                          | Low health literacy (3)                                                             |
| B8  | Costs (extrinsic barrier for patient adherence)                                                                 | Costs of LIs to patients (1)                                                        |
| B9  | Weather (extrinsic barrier for patient adherence)                                                               | Inconvenience to patients when accessing LIs (1)                                    |
| B10 | Patient expectations (not keen to participate in exercise/play active role in management, desire for quick fix) | Negative attitude toward LIs (3)                                                    |
| B11 | Lack of confidence/knowledge/skills in implementing evidence into practice (e.g. weight management)             | Lack of knowledge or skills around LIs or promoting behavioral change (2)           |
| B12 | Advice about how to lose weight was limited to brief general advice                                             | Perception of own role potentially impeding prescription or follow-up of LIs (2)    |
| B13 | Considering weight loss to be outside own scope of practice (role of a dietician)                               | Perception of own role potentially impeding prescription or follow-up of LIs (2)    |
| B14 | Comfortable suggesting surgery to patients who responded poorly to conservative management                      | Perception of own role potentially impeding prescription or follow-up of LIs (2)    |
| F1  | Education focused on self-management strategies                                                                 | High health literacy or importance of education (3)                                 |
| F2  | Importance of evaluating a patient's overall functional ability (rather than only knee signs/symptoms)          | Other patient characteristics (3)                                                   |
| F3  | Perceiving exercise prescription to be their main role                                                          | Perception of own role potentially stimulating prescription or follow-up of LIs (2) |
| F4  | Importance of tailored exercise program                                                                         | Ability and importance of providing personalized treatment within LIs (1)           |
| F5  | Advising patients against surgery for as long as possible (last option)                                         | Perception of own role potentially stimulating prescription or follow-up of LIs (2) |
| F6  | Implementing several strategies to boost adherence                                                              | Perception of own role potentially stimulating prescription or follow-up of LIs (2) |
| F7  | Aware that being overweight/obese is risk factor for knee OA/losing weight is important                         | Positive attitude toward LIs (2)                                                    |
| F8  | Not their role to advise the patient about knee surgery, opting not to discuss surgery at all                   | Perception of own role potentially stimulating prescription or follow-up of LIs (2) |
| F9  | Advising patients against knee arthroscopy if specifically asked about this procedure                           | Perception of own role potentially stimulating prescription or follow-up of LIs (2) |

### Wallis (2020) [52]

| Number | Description                                                                        | Subcategory (domain)                             |
|--------|------------------------------------------------------------------------------------|--------------------------------------------------|
| B1     | Cost (program access barrier)                                                      | Costs of LIs to patients (1)                     |
| B2     | Transport, waiting time and parking related to attendance (program access barrier) | Inconvenience to patients when accessing LIs (1) |
| B3     | Geography (program access barrier)                                                 | Inconvenience to patients when accessing LIs (1) |
| B4     | Available session times (program access barrier)                                   | Inconvenience to patients when accessing LIs (1) |

|     |                                                                                                                       |                                                                                                  |
|-----|-----------------------------------------------------------------------------------------------------------------------|--------------------------------------------------------------------------------------------------|
| B5  | Using negative language to describe OA (wear-and-tear/joint damage/bone-on-bone/degenerative condition)               | OA seen as untreatable and local condition (wear-and-tear) (9)                                   |
| B6  | Existing comorbidities (patient-related barrier)                                                                      | Negative impact of comorbidities (3)                                                             |
| B7  | Osteoarthritis severity (mild/severe) (patient-related barrier)                                                       | Severity of disease and symptoms (3)                                                             |
| B8  | Lack of motivation to participate active lifestyle interventions (patient-related barrier)                            | Negative attitude toward LIs (3)                                                                 |
| B9  | Older age (patient-related barrier)                                                                                   | Other patient characteristics (3)                                                                |
| B10 | Language/different cultural backgrounds (patient-related barrier)                                                     | Low health literacy (3)                                                                          |
| B11 | Work/other commitments precluding exercise-therapy (patient-related barrier)                                          | Other responsibilities (3)                                                                       |
| B12 | Program factors (e.g. single discipline led intervention)                                                             | Non-optimal content or structure of LIs (1)                                                      |
| B13 | Existing relationships with physiotherapists (as barrier to referral if patient already had treating physiotherapist) | Negative attitude toward LIs (3)                                                                 |
| B14 | Urging caution to patients about participating in higher impact exercise/activities                                   | LIs are unsafe or have negative effects (1)                                                      |
| F1  | A more holistic program as part of a multidisciplinary model of service was preferred                                 | Positive experiences with or suggestions to improve the content or structure of LIs (1)          |
| F2  | Knowledge that program was delivered by well-trained and trusted physiotherapist                                      | Good interdisciplinary collaboration or healthcare provision, or suggestions for improvement (4) |
| F3  | Receiving communication back from program physiotherapist about patient outcomes                                      | Improving communication between HCPs (4)                                                         |
| F4  | Positive about program (alternative approach and opportunity to avoid a joint replacement)                            | LIs have positive effects (not further specified) (1)                                            |
| F5  | Exercise therapy may be effective by giving more muscular support for joints                                          | LIs have positive effects on affected joint(s) (1)                                               |
| F6  | Exercise therapy may be effective by giving opportunity to improve confidence about activities/mobility               | LIs have positive mental effects (1)                                                             |
| F7  | Value of program's structure and peer (group) support                                                                 | Positive experiences with or suggestions to improve the content or structure of LIs (1)          |
| F8  | Name of program ('Good Life with OsteoArthritis') implied optimism and positive outcome                               | Positive experiences with or suggestions to improve the content or structure of LIs (1)          |
| F9  | Received positive feedback from their patients about program                                                          | Positive experiences with or suggestions to improve the content or structure of LIs (1)          |
| F10 | Including links on websites of partners (suggestion for promotion and referrals)                                      | Access to information resources (5)                                                              |
| F11 | Simple, streamlined referral process (suggestion for promotion and referrals)                                         | Needs regarding communication and referral procedures (4)                                        |
| F12 | Close, convenient locations (suggestion for promotion and referrals)                                                  | Convenience for patients when accessing LIs (1)                                                  |
| F13 | Appropriate session times for working populations (suggestion for promotion and referrals)                            | Convenience for patients when accessing LIs (1)                                                  |
| F14 | Specific information about program (suggestion for promotion and referrals)                                           | Availability of information resources (5)                                                        |
| F15 | Providing trial of sessions to assist patients to get started (suggestion for promotion and referrals)                | Ease for patients during participation in LIs (1)                                                |
| F16 | Provision of free parking at health service (suggestion for promotion and referrals)                                  | Convenience for patients when accessing LIs (1)                                                  |

## Cottrell (2016) [53]

| Number | Description                                                                                                 | Subcategory (domain)                                                                |
|--------|-------------------------------------------------------------------------------------------------------------|-------------------------------------------------------------------------------------|
| B1     | Insufficient time in consultations (*)                                                                      | Lack of time within patient consultations (5)                                       |
| B2     | Limitations to accessing services (e.g. lack of facilities, costs) (*)                                      | LIs are unavailable or inaccessible (1)                                             |
| B3     | Services do not meet expectations (*)                                                                       | Non-optimal content or structure of LIs (1)                                         |
| B4     | Geographical problems (e.g. remote location, scared to walk in local area) (*)                              | Inconvenience to patients when accessing LIs (1)                                    |
| B5     | Cannot access necessary resources (*)                                                                       | Challenges in accessing information resources (5)                                   |
| B6     | GP does not prioritise exercise (*)                                                                         | Negative attitude toward LIs (2)                                                    |
| B7     | Unclear what physio offers (*)                                                                              | Non-optimal interdisciplinary collaboration or healthcare provision (4)             |
| B8     | Exercise does not match patient needs/expectations (*)                                                      | Negative attitude toward LIs (3)                                                    |
| B9     | Achieving patient behavior change is difficult (*)                                                          | Potential effects of LIs are difficult to accomplish (1)                            |
| B10    | GPs should (perhaps) not follow-up patients to monitor extent of continuation of exercises (*)              | Perception of own role potentially impeding prescription or follow-up of LIs (2)    |
| B11    | It is the patient's own responsibility to continue doing their exercise programme (*)                       | Perception of own role potentially impeding prescription or follow-up of LIs (2)    |
| B12    | Increasing the overall activity levels does not/might not stop the knee problem getting worse (*)           | LIs have little or no effect on OA (1)                                              |
| B13    | Time constraints prevent GPs from providing advice on individual exercises for CKP (*)                      | Lack of time within patient consultations (5)                                       |
| F1     | Physiotherapy (referral) needs to be prioritised                                                            | Positive attitude toward LIs (2)                                                    |
| F2     | It is part of my job to reassure patients about the safety of exercise for CKP (*)                          | Perception of own role potentially stimulating prescription or follow-up of LIs (2) |
| F3     | Exercise for CKP is most beneficial when it is tailored to meet individual patient needs (*)                | Ability and importance of providing personalized treatment within LIs (1)           |
| F4     | A standard set of exercises is not/might not be sufficient for every patient with chronic knee problems (*) | Ability and importance of providing personalized treatment within LIs (1)           |
| F5     | GPs should educate patients with CKP about how to change their lifestyle for the better (*)                 | Perception of own role potentially stimulating prescription or follow-up of LIs (2) |
| F6     | It is important that people with CKP increase their overall activity levels (*)                             | Positive attitude toward LIs (2)                                                    |
| F7     | How well a patient complies with their exercise programme determines how effective it will be (*)           | Importance of high patient adherence or engagement for effectiveness of LIs (3)     |
| F8     | GPs should prescribe quadriceps strengthening exercises to every patient with CKP (*)                       | Perception of own role potentially stimulating prescription or follow-up of LIs (2) |
| F9     | GPs should prescribe general exercise (e.g. walking or swimming) for every patient with CKP (*)             | Perception of own role potentially stimulating prescription or follow-up of LIs (2) |
| F10    | Knee problems are improved by quadriceps strengthening exercises (*)                                        | LIs have positive effects on affected joint(s) (1)                                  |
| F11    | Knee problems are improved by general exercise (e.g. walking or swimming) (*)                               | LIs have positive effects on affected joint(s) (1)                                  |



|     |                                                                                                             |                                                                                                  |
|-----|-------------------------------------------------------------------------------------------------------------|--------------------------------------------------------------------------------------------------|
| F12 | Quadriceps strengthening exercises for the knee are safe for everybody to do (*)                            | LIs are safe (1)                                                                                 |
| F13 | General exercise (e.g. walking or swimming) is safe for everybody to do (*)                                 | LIs are safe (1)                                                                                 |
| F14 | Exercise is effective for patients if an X-ray shows severe knee OA (*)                                     | Severity of disease and symptoms (3)                                                             |
| F15 | Increasing the strength of the muscles around the knee stops the knee problem getting worse (*)             | LIs have positive effects on affected joint(s) (1)                                               |
| F16 | Exercise for CKP should (perhaps) preferably be used before drug treatment has been tried (*)               | Positive attitude toward LIs (2)                                                                 |
| F17 | Exercise for CKP is more effectively provided by physiotherapists than GPs (*)                              | Good interdisciplinary collaboration or healthcare provision, or suggestions for improvement (4) |
| U1  | Exercise does not/might not work just as well for everybody, regardless of the amount of pain they have (*) | Severity of disease and symptoms (3)                                                             |

Duarte (2019) [54]

| Number | Description                                                                               | Subcategory (domain)                                  |
|--------|-------------------------------------------------------------------------------------------|-------------------------------------------------------|
| B1     | Main concern was participant adherence to physical activity routines after end of program | Low patient adherence or engagement (3)               |
| F1     | Improvement in the physical condition of participants                                     | LIs have positive effects (not further specified) (1) |
| F2     | Enthusiastic participation of the participants                                            | High patient adherence or engagement (3)              |

Hill (2018) [55]

| Number | Description                                                                                                                                                                        | Subcategory (domain)                                                                             |
|--------|------------------------------------------------------------------------------------------------------------------------------------------------------------------------------------|--------------------------------------------------------------------------------------------------|
| B1     | Not (or perhaps not) interested in being the orthopedic surgeon in an ortho-bariatric centre (*)                                                                                   | Perception of own role potentially impeding prescription or follow-up of LIs (2)                 |
| F1     | There was a BMI threshold above which they would not perform a TKA at all (*)                                                                                                      | Perception of own role potentially stimulating prescription or follow-up of LIs (2)              |
| F2     | There was a BMI threshold above which they would not perform a TKA until the patient had attended a weight management program (*)                                                  | Perception of own role potentially stimulating prescription or follow-up of LIs (2)              |
| F3     | Weight loss should be the first-line treatment in the management of obese patients with symptomatic knee OA (*)                                                                    | Positive attitude toward LIs (2)                                                                 |
| F4     | Obese patients with symptomatic knee OA should be referred to a specialist weight management service before orthopaedic assessment (*)                                             | Positive attitude toward LIs (2)                                                                 |
| F5     | Obese patients with symptomatic knee OA should be assessed by a specialist multidisciplinary service, which should include an orthopaedic surgeon (*)                              | Good interdisciplinary collaboration or healthcare provision, or suggestions for improvement (4) |
| F6     | Support for creation of regional centres where orthopedic surgeons and bariatric surgeons, with their respective teams, could assess obese patients with symptomatic knee pain (*) | Good interdisciplinary collaboration or healthcare provision, or suggestions for improvement (4) |

Hill (2018) [56]

| Number | Description                                                                                                                                                                         | Subcategory (domain)                                                                             |
|--------|-------------------------------------------------------------------------------------------------------------------------------------------------------------------------------------|--------------------------------------------------------------------------------------------------|
| B1     | I don't have/might not have the required knowledge and training around obesity care (*)                                                                                             | Lack of knowledge or skills around LIs or promoting behavioral change (2)                        |
| B2     | Weight management services are not/might not be adequately commissioned in my area (*)                                                                                              | LIs are unavailable or inaccessible (1)                                                          |
| F1     | Weight loss should be the first-line treatment in the management of symptomatic knee OA in obesity (*)                                                                              | Positive attitude toward LIs (2)                                                                 |
| F2     | Community interventions are effective at achieving sufficient and sustained weight loss (*)                                                                                         | LIs have positive effects on general health (1)                                                  |
| F3     | Obese patients with symptomatic knee OA should be referred to a specialist weight management service before orthopaedic assessment (*)                                              | Good interdisciplinary collaboration or healthcare provision, or suggestions for improvement (4) |
| F4     | Obese patients with symptomatic knee OA should be assessed by a specialist multidisciplinary service (*)                                                                            | Good interdisciplinary collaboration or healthcare provision, or suggestions for improvement (4) |
| F5     | Support for creation of regional centres where orthopaedic surgeons and bariatric surgeons, with their respective teams, could assess obese patients with symptomatic knee pain (*) | Positive attitude toward LIs (2)                                                                 |
| F6     | Intention to refer patients to an ortho-bariatric centre if it existed (*)                                                                                                          | Perception of own role potentially stimulating prescription or follow-up of LIs (2)              |

Hofstede (2016) [57]

| Number | Description                                                                         | Subcategory (domain)                                                                             |
|--------|-------------------------------------------------------------------------------------|--------------------------------------------------------------------------------------------------|
| F1     | Clear referral criteria/guideline (*)                                               | Availability of information resources (5)                                                        |
| F2     | Important to follow guidelines (*)                                                  | Positive attitude toward guidelines or protocols (2)                                             |
| F3     | Important to try non-surgical treatments first (*)                                  | Positive attitude toward LIs (2)                                                                 |
| F4     | Only few drawbacks for the use of non-surgical treatments (*)                       | LIs are safe (1)                                                                                 |
| F5     | Patients benefit from weight loss (*)                                               | LIs have positive effects on general health (1)                                                  |
| F6     | Non-surgical treatments motivate patients to do things themselves (*)               | LIs have positive mental effects (1)                                                             |
| F7     | Good results of physical therapy (*)                                                | LIs have positive effects (not further specified) (1)                                            |
| F8     | Important to delay a surgery as long as possible (*)                                | Positive attitude toward LIs (2)                                                                 |
| F9     | Agreements with colleagues about the content of the care trajectory (*)             | Good interdisciplinary collaboration or healthcare provision, or suggestions for improvement (4) |
| F10    | Peer review/audit of professional association (*)                                   | Audit (6)                                                                                        |
| F11    | Positive attitudes of colleagues about non-surgical treatments (*)                  | Good interdisciplinary collaboration or healthcare provision, or suggestions for improvement (4) |
| F12    | Clarity on what the patient has done at the physical therapist (*)                  | Improving communication between HCPs (4)                                                         |
| F13    | Agreements/ deliberations with primary care (GP, physical therapist, dietician) (*) | Good interdisciplinary collaboration or healthcare provision, or suggestions for improvement (4) |

|     |                                             |                                                                     |
|-----|---------------------------------------------|---------------------------------------------------------------------|
| F14 | Availability of non-surgical treatments (*) | LIs are available or accessible, or suggestions for improvement (1) |
|-----|---------------------------------------------|---------------------------------------------------------------------|

Lawford (2018) [58]

| Number | Description                                                                                                                                                | Subcategory (domain)                                                       |
|--------|------------------------------------------------------------------------------------------------------------------------------------------------------------|----------------------------------------------------------------------------|
| B1     | Using the telephone to consult with an OA patient and prescribe an exercise program would not/might not be easy for me (*)                                 | Other challenges for HCPs regarding feasibility of telehealth (1)          |
| B2     | I would not/might not be as satisfied talking to an OA patient over the telephone as I would be talking to the patient in person in my consulting room (*) | Other challenges for HCPs regarding feasibility of telehealth (1)          |
| B3     | An exercise program prescribed by a PT over the telephone would not/might not improve a patient's OA (*)                                                   | Disadvantages of telehealth in terms of effectiveness (1)                  |
| B4     | I would not/might not be able to adequately monitor a patient's OA over the telephone (*)                                                                  | Challenges for HCPs regarding lack of physical/visual contact (1)          |
| B5     | I do not/might not like that there would be no physical contact with an OA patient when consulting over the telephone (*)                                  | Challenges for HCPs regarding lack of physical/visual contact (1)          |
| B6     | I do not/might not like that there would be no physical contact with an OA patient when consulting over the internet video (*)                             | Challenges for HCPs regarding lack of physical/visual contact (1)          |
| B7     | I would not/might not be interested in being involved in a service offering PT-prescribed exercise over the telephone for my people with OA (*)            | Other challenges for HCPs regarding feasibility of telehealth (1)          |
| B8     | Using the telephone would not/might not be an acceptable way for me to deliver an exercise program to patients with OA (*)                                 | Other challenges for HCPs regarding feasibility of telehealth (1)          |
| B9     | Using the telephone would not/might not be a useful (practical) way for me to deliver an exercise program to patients with OA (*)                          | Other challenges for HCPs regarding feasibility of telehealth (1)          |
| B10    | Using the telephone would not/might not be an effective way for me to deliver an exercise program to patients with OA (*)                                  | Other challenges for HCPs regarding feasibility of telehealth (1)          |
| B11    | Using the telephone would not/might not be a safe way for patients to receive a PT-prescribed exercise program for their OA (*)                            | Telehealth is not safe for patients or patient/data privacy (1)            |
| F1     | Exercise is beneficial for OA (*)                                                                                                                          | LIs have positive effects on affected joint(s) (1)                         |
| F2     | I would get a good understanding of a patient's OA over the telephone (*)                                                                                  | Lack of physical/visual contact not a major issue for HCPs (1)             |
| F3     | I would get a good understanding of a patient's OA over the internet video (*)                                                                             | Lack of physical/visual contact not a major issue for HCPs (1)             |
| F4     | A patient's privacy would not be violated if I prescribed them an exercise program over the telephone (*)                                                  | Telehealth is safe for patients or patient/data privacy (1)                |
| F5     | A patient's privacy would not be violated if I prescribed them an exercise program over the internet video (*)                                             | Telehealth is safe for patients or patient/data privacy (1)                |
| F6     | Using the internet video to consult with an OA patient and prescribe an exercise program would be easy for me (*)                                          | Positive attitude or needs of HCPs regarding feasibility of telehealth (1) |

|     |                                                                                                                                                   |                                                                            |
|-----|---------------------------------------------------------------------------------------------------------------------------------------------------|----------------------------------------------------------------------------|
| F7  | I would be as satisfied talking to an OA patient over the internet video as I would be talking to the patient in person in my consulting room (*) | Positive attitude or needs of HCPs regarding feasibility of telehealth (1) |
| F8  | An exercise program prescribed by a PT over the internet video would improve a patient's OA (*)                                                   | Benefits of telehealth in terms of effectiveness (1)                       |
| F9  | An exercise program prescribed by a PT over the telephone would save a patient money (*)                                                          | Patient-related benefits regarding feasibility of telehealth (1)           |
| F10 | An exercise program prescribed by a PT over the internet video would save a patient money (*)                                                     | Patient-related benefits regarding feasibility of telehealth (1)           |
| F11 | I would be able to adequately monitor a patient's OA over the internet video (*)                                                                  | Lack of physical/visual contact not a major issue for HCPs (1)             |
| F12 | Receiving an exercise program from a PT over the telephone would be a convenient form of health care for an OA patient (*)                        | Patient-related benefits regarding feasibility of telehealth (1)           |
| F13 | Receiving an exercise program from a PT over the internet video would be a convenient form of health care for an OA patient (*)                   | Patient-related benefits regarding feasibility of telehealth (1)           |
| F14 | Receiving an exercise program from a PT over the telephone would save the patient time (*)                                                        | Patient-related benefits regarding feasibility of telehealth (1)           |
| F15 | Receiving an exercise program from a PT over the internet video would save the patient time (*)                                                   | Patient-related benefits regarding feasibility of telehealth (1)           |
| F16 | I would be interested in being involved in a service offering PT-prescribed exercise over the internet video for my people with OA (*)            | Positive attitude or needs of HCPs regarding feasibility of telehealth (1) |
| F17 | Using the internet video would be an acceptable way for me to deliver an exercise program to patients with OA (*)                                 | Positive attitude or needs of HCPs regarding feasibility of telehealth (1) |
| F18 | Using the internet video would be a useful (practical) way for me to deliver an exercise program to patients with OA (*)                          | Positive attitude or needs of HCPs regarding feasibility of telehealth (1) |
| F19 | Using the internet video would be an effective way for me to deliver an exercise program to patients with OA (*)                                  | Positive attitude or needs of HCPs regarding feasibility of telehealth (1) |
| F20 | Using the telephone would be an affordable way for patients to receive a PT-prescribed exercise program for their OA (*)                          | Patient-related benefits regarding feasibility of telehealth (1)           |
| F21 | Using the internet video would be an affordable way for patients to receive a PT-prescribed exercise program for their OA (*)                     | Patient-related benefits regarding feasibility of telehealth (1)           |
| F22 | Using the internet video would be a safe way for patients to receive a PT-prescribed exercise program for their OA (*)                            | Telehealth is safe for patients or patient/data privacy (1)                |

### Reid (2014) [59]

| Number | Description                                                                                   | Subcategory (domain)                    |
|--------|-----------------------------------------------------------------------------------------------|-----------------------------------------|
| B1     | Lack of availability of physiotherapy                                                         | LIs are unavailable or inaccessible (1) |
| B2     | Poor rate of previous (physiotherapy) success (*)                                             | Other patient characteristics (3)       |
| B3     | There is a paucity of evidence in regards to the effectiveness of physiotherapy treatment for | LIs have little or no effect on OA (1)  |

|    |                                                                                                                                      |                                                                                                  |
|----|--------------------------------------------------------------------------------------------------------------------------------------|--------------------------------------------------------------------------------------------------|
|    | OA hip and/or knee (*)                                                                                                               |                                                                                                  |
| B4 | Past experience has shown physiotherapy to be ineffective (*)                                                                        | LIs have little or no effect on OA (1)                                                           |
| F1 | Referring patients to physiotherapy if they had high levels of pain/disability and where radiographic evidence of OA was present (*) | Severity of disease and symptoms (3)                                                             |
| F2 | Referring patients to physiotherapy if they were of a younger age (*)                                                                | Other patient characteristics (3)                                                                |
| F3 | Good access to physiotherapy in area (*)                                                                                             | LIs are available or accessible, or suggestions for improvement (1)                              |
| F4 | Physiotherapists do not/might not lack expertise in OA management (*)                                                                | Good interdisciplinary collaboration or healthcare provision, or suggestions for improvement (4) |
| F5 | Conservative treatment is (perhaps) an important part of OA management (*)                                                           | Positive attitude toward LIs (2)                                                                 |

### De Rooij (2020) [60]

| Number | Description                                                                                                                                               | Subcategory (domain)                                                      |
|--------|-----------------------------------------------------------------------------------------------------------------------------------------------------------|---------------------------------------------------------------------------|
| B1     | In my daily clinical practice I can (perhaps) not integrate working according to the protocol well (*)                                                    | LIs are not feasible or sustainable (1)                                   |
| B2     | The lay out of the protocol does not/might not facilitate its usage in daily practice (*)                                                                 | Challenges for HCPs during delivery of LIs (1)                            |
| B3     | I do not/might not treat enough patients with knee OA and comorbidity to apply the protocol (*)                                                           | LIs are not feasible or sustainable (1)                                   |
| B4     | The protocol does not/might not fit well with my working methods of daily clinical practice (*)                                                           | LIs are not feasible or sustainable (1)                                   |
| B5     | I do not/might not have sufficient knowledge about knee OA exercise therapy and comorbidity to apply the protocol in daily clinical practice (*)          | Lack of knowledge or skills around LIs or promoting behavioral change (2) |
| B6     | I do not/might not have sufficient skills to apply the protocol in daily clinical practice (*)                                                            | Lack of knowledge or skills around specific resources (2)                 |
| B7     | I do not/might not read the protocol sufficiently to remember any of its contents (*)                                                                     | Lack of knowledge or skills around specific resources (2)                 |
| B8     | The number of treatments that the patient receives from their insurance company is a barrier in using the protocol (*)                                    | Restrictions due to health insurance (7)                                  |
| B9     | The patients are not/might not be cooperative in applying the protocol in daily clinical practice (*)                                                     | Negative attitude toward LIs (3)                                          |
| B10    | My colleagues in physiotherapy are not/might not be cooperative in applying the protocol in daily clinical practice (*)                                   | Non-optimal interdisciplinary collaboration or healthcare provision (4)   |
| B11    | The management of my practice is not/might not be collaborative regarding the application of the protocol in daily clinical practice (*)                  | Management not supportive (6)                                             |
| B12    | The general practitioners or other physicians are not/might not be collaborative regarding the application of the protocol in daily clinical practice (*) | Non-optimal interdisciplinary collaboration or healthcare provision (4)   |
| B13    | Suboptimal collaboration with general practitioners and physicians                                                                                        | Non-optimal interdisciplinary collaboration or healthcare provision (4)   |
| B14    | Referring physicians do not always believe in/may lack knowledge about effectiveness of exercise therapy                                                  | Non-optimal interdisciplinary collaboration or healthcare provision (4)   |
| B15    | Patients do not always believe in/may lack knowledge about effectiveness of exercise therapy                                                              | Low health literacy (3)                                                   |
| B16    | Total amount of knee OA patients with comorbidity was lower than expected                                                                                 | LIs are not feasible or sustainable (1)                                   |

|     |                                                                                                                                                       |                                                                                                  |
|-----|-------------------------------------------------------------------------------------------------------------------------------------------------------|--------------------------------------------------------------------------------------------------|
| B17 | Number of treatment sessions patients receive from insurance companies restricted application of the strategy                                         | Restrictions due to health insurance (7)                                                         |
| B18 | Patients with knee OA and comorbidity are not always motivated to perform exercises                                                                   | Negative attitude toward LIs (3)                                                                 |
| B19 | Requesting medical information about patients from specialists takes a lot of time                                                                    | Challenges of communication and referral procedures (4)                                          |
| B20 | Physicians are not always collaborating in discussing medical conditions of patients                                                                  | Lack of communication between HCPs (4)                                                           |
| F1  | The protocol is feasible in daily clinical practice (*)                                                                                               | LIs are feasible or sustainable (1)                                                              |
| F2  | The protocol supports me in clinical reasoning (*)                                                                                                    | Available resources might improve knowledge and decision-making (2)                              |
| F3  | The protocol gives the opportunity to make your own decisions regarding history taking, physical examination, and treatment (*)                       | Ability and importance of providing personalized treatment within LIs (1)                        |
| F4  | Some contents of the protocol are not/might not be incorrect (*)                                                                                      | Positive experiences with or suggestions to improve the content or structure of LIs (1)          |
| F5  | In my daily clinical practice, I work with sufficient equipment (including blood pressure meter, saturation meter) to properly apply the protocol (*) | LIs are feasible or sustainable (1)                                                              |
| F6  | The protocol is supporting the improvement of my knowledge regarding knee OA exercise therapy and comorbidity (*)                                     | Available resources might improve knowledge and decision-making (2)                              |
| F7  | The recommendations over adapting the diagnostic phase (history taking and physical examination) in the protocol are clear and understandable (*)     | Ease for HCPs during delivery of LIs (1)                                                         |
| F8  | The recommendations over adapting the OA exercise therapy in the protocol are clear and understandable (*)                                            | Ease for HCPs during delivery of LIs (1)                                                         |
| F9  | The protocol is supportive in which comorbidity-related symptoms I need to monitor before, during and after treatment (*)                             | Available resources might improve knowledge and decision-making (2)                              |
| F10 | Working with the protocol invites me to discuss more with experts in the field of the comorbidity (*)                                                 | Good interdisciplinary collaboration or healthcare provision, or suggestions for improvement (4) |
| F11 | In general, I do not/might not feel resistance towards working according to protocols (*)                                                             | Positive attitude toward guidelines or protocols (2)                                             |
| F12 | I have changed my working method (due to the protocol) (*)                                                                                            | LIs are feasible or sustainable (1)                                                              |
| F13 | Working according to the protocol is not/might not be too time-consuming (*)                                                                          | Adequate duration of specific interventions or protocols (5)                                     |
| F14 | Working according to the protocol should be financially rewarded (*)                                                                                  | Financial reward for implementing LIs (5)                                                        |
| F15 | The protocol is applicable to OA patients with comorbidity that I see in my clinical practice (*)                                                     | Positive experiences with or suggestions to improve the content or structure of LIs (1)          |
| F16 | Intake procedure is feasible and implementable                                                                                                        | LIs are feasible or sustainable (1)                                                              |
| F17 | Important to extend the intake phase to at least to 45 min                                                                                            | Positive experiences with or suggestions to improve the content or structure of LIs (1)          |
| F18 | The more you apply the strategy in daily practice, the easier it is to integrate it in your daily working method                                      | LIs are feasible or sustainable (1)                                                              |
| F19 | More insight into exercise tolerance/more background knowledge to make clinical decision by using strategy                                            | Available resources might improve knowledge and decision-making (2)                              |
| F20 | Inform referrers better about benefits of exercise therapy in patients with knee OA and                                                               | Good interdisciplinary collaboration or healthcare provision, or                                 |

|     |                                                                                                            |                                                                                                  |
|-----|------------------------------------------------------------------------------------------------------------|--------------------------------------------------------------------------------------------------|
|     | comorbidity                                                                                                | suggestions for improvement (4)                                                                  |
| F21 | Inform patients with knee OA and comorbidity better about benefits of exercise therapy                     | High health literacy or importance of education (3)                                              |
| F22 | Optimize collaboration with orthopaedic surgeons and other health care providers                           | Good interdisciplinary collaboration or healthcare provision, or suggestions for improvement (4) |
| F23 | In complex patients insurance companies should reimburse more treatment sessions                           | Benefits of good health insurance (7)                                                            |
| F24 | Useful to plan follow up/refreshment training to repeat/discuss content of course/protocol and application | Ease for HCPs during delivery of LIs (1)                                                         |
| F25 | Shortening the protocol would increase user-friendliness                                                   | Ease for HCPs during delivery of LIs (1)                                                         |

Holden (2009) [61]

| Number | Description                                                                                                      | Subcategory (domain)                                                             |
|--------|------------------------------------------------------------------------------------------------------------------|----------------------------------------------------------------------------------|
| B1     | Biomedical perspective on knee OA, attributing signs and symptoms to local knee pathology or wear and tear       | OA seen as untreatable and local condition (wear-and-tear) (9)                   |
| B2     | OA seen as chronic degenerative condition that would progressively worsen over time (only cure being surgery)    | OA seen as untreatable and local condition (wear-and-tear) (9)                   |
| B3     | Effectiveness related to severity of joint damage/pain level (less effective when more damage/pain)              | Severity of disease and symptoms (3)                                             |
| B4     | Fear of increasing symptoms (as barrier to prescribing exercise)                                                 | LIs are unsafe or have negative effects (1)                                      |
| B5     | Causing disease progression, particularly through weight-bearing activities (as barrier to prescribing exercise) | LIs are unsafe or have negative effects (1)                                      |
| B6     | Exacerbating patient's comorbidities (as barrier to prescribing exercise)                                        | LIs are unsafe or have negative effects (1)                                      |
| B7     | Reluctant to promote exercise in the presence of pain                                                            | Severity of disease and symptoms (3)                                             |
| B8     | Negative perceptions of patients' levels of exercise adherence                                                   | Low patient adherence or engagement (3)                                          |
| B9     | Lack of motivation or laziness (as patient-centered barrier to adherence)                                        | Negative attitude toward LIs (3)                                                 |
| B10    | Human nature (as patient-centered barrier to adherence)                                                          | Potential effects of LIs are difficult to accomplish (1)                         |
| B11    | Pain (as patient-centered barrier to adherence)                                                                  | Severity of disease and symptoms (3)                                             |
| B12    | Fear of harm (as patient-centered barrier to adherence)                                                          | Low health literacy (3)                                                          |
| B13    | Negative treatment expectations (as patient-centered barrier to adherence)                                       | Negative attitude toward LIs (3)                                                 |
| B14    | Therapist's role seen as assessment/exercise prescription/education (relatively short-term responsibilities)     | Perception of own role potentially impeding prescription or follow-up of LIs (2) |
| B15    | Patient's role to follow prescribed exercise program over long term/get on board with treatment                  | Perception of own role potentially impeding prescription or follow-up of LIs (2) |
| B16    | Limited time to review individual patients reduced opportunities to facilitate behavior change                   | Lack of time within patient consultations (5)                                    |
| B17    | Large caseloads and pressure of waiting lists reduced the number of treatment sessions provided                  | Lack of time within patient consultations (5)                                    |
| B18    | Limited opportunity to provide follow-up sessions after discharge                                                | Lack of time within patient consultations (5)                                    |
| B19    | Poor links to community facilities such as local leisure centres                                                 | LIs are unavailable or inaccessible (1)                                          |

|     |                                                                                                                                          |                                                                                     |
|-----|------------------------------------------------------------------------------------------------------------------------------------------|-------------------------------------------------------------------------------------|
| B20 | Gaps in knowledge/skills (including how to facilitate behavior change, particularly with less motivated patients)                        | Lack of knowledge or skills around LIs or promoting behavioral change (2)           |
| B21 | Exercises are not/might not be effective for patients if an X-ray shows severe knee osteoarthritis (*)                                   | Severity of disease and symptoms (3)                                                |
| B22 | Increasing overall activity levels does not/might not stop the knee problem getting worse (*)                                            | LIs have little or no effect on OA (1)                                              |
| B23 | Increasing the strength of the muscles around the knee does not/might not stop the knee problem getting worse (*)                        | LIs have little or no effect on OA (1)                                              |
| B24 | General exercise is not/might not be safe for everybody to do (*)                                                                        | LIs are unsafe or have negative effects (1)                                         |
| B25 | Local strengthening exercises for the knee are not/might not be safe for everybody to do (*)                                             | LIs are unsafe or have negative effects (1)                                         |
| B26 | Knee problems are not/might not be improved by general exercise (*)                                                                      | LIs have little or no effect on OA (1)                                              |
| B27 | Physical therapists should (perhaps) not prescribe general exercise for every patient with knee OA (*)                                   | Perception of own role potentially impeding prescription or follow-up of LIs (2)    |
| B28 | It is the patient's own responsibility to continue doing their exercise program (*)                                                      | Perception of own role potentially impeding prescription or follow-up of LIs (2)    |
| B29 | It is not/might not be the physiotherapist's responsibility to make sure that the patient will continue doing their exercise program (*) | Perception of own role potentially impeding prescription or follow-up of LIs (2)    |
| B30 | It is not/might not be important that people with knee OA increase their overall activity levels (*)                                     | Negative attitude toward LIs (2)                                                    |
| F1  | Effectiveness related to severity of joint damage/pain level (more effective when less damage/pain)                                      | Severity of disease and symptoms (3)                                                |
| F2  | Importance of exercise adherence/link between level of adherence and clinical outcomes (dose-response effect)                            | Importance of high patient adherence or engagement for effectiveness of LIs (3)     |
| F3  | Recognizing potential influence on exercise adherence, sharing responsibility of exercise adherence with patient                         | Perception of own role potentially stimulating prescription or follow-up of LIs (2) |
| F4  | Exercises are effective for patients if an X-ray shows moderate knee osteoarthritis (*)                                                  | Severity of disease and symptoms (3)                                                |
| F5  | Exercises are effective for patients if an X-ray shows mild knee osteoarthritis (*)                                                      | Severity of disease and symptoms (3)                                                |
| F6  | Knee problems are improved by local strengthening exercises (*)                                                                          | LIs have positive effects on affected joint(s) (1)                                  |
| F7  | Physical therapists should prescribe local strengthening exercise for every patient with knee OA (*)                                     | Perception of own role potentially stimulating prescription or follow-up of LIs (2) |
| F8  | How well a patient complies with their exercise program determines how effective it will be (*)                                          | Importance of high patient adherence or engagement for effectiveness of LIs (3)     |
| F9  | Physiotherapists should educate chronic patients with knee OA about how to change their lifestyle for the better (*)                     | Perception of own role potentially stimulating prescription or follow-up of LIs (2) |
| F10 | A standard set of exercises is not/might not be sufficient for every patient with knee OA (*)                                            | Ability and importance of providing personalized treatment within LIs (1)           |
| F11 | Exercise for knee OA is most beneficial when it is tailored to meet individual patient needs (*)                                         | Ability and importance of providing personalized treatment within LIs (1)           |
| U1  | Exercise does not/might not work just as well for everybody, regardless of the amount of pain they have (*)                              | Severity of disease and symptoms (3)                                                |



Kloek (2020) [62]

| Number | Description                                                                                                      | Subcategory (domain)                                                                    |
|--------|------------------------------------------------------------------------------------------------------------------|-----------------------------------------------------------------------------------------|
| B1     | Less satisfied about the applicability of e-Exercise for only one diagnosis                                      | Insufficient ability to provide personalized treatment within LIs (1)                   |
| B2     | Less satisfied about time needed to get used to e-Exercise during high work pressure/administrative burden       | Lack of time due to other demands (or not further specified) (5)                        |
| B3     | Lack of technology affinity (reason for patients' non-willingness to participate in e-Exercise)                  | Patient-related challenges regarding feasibility of telehealth (1)                      |
| B4     | Patients preferred regular face-to-face contact                                                                  | Patient-related challenges regarding feasibility of telehealth (1)                      |
| B5     | Perceiving web-based application as an additional burden                                                         | Lack of time due to other demands (or not further specified) (5)                        |
| B6     | Technical skills (lack of)                                                                                       | Other challenges for HCPs regarding feasibility of telehealth (1)                       |
| B7     | Clarity of instruction manual and course (lack of)                                                               | Challenges for HCPs during delivery of LIs (1)                                          |
| B8     | Adaptive capacity to change treatment routines (lack of)                                                         | Other challenges for HCPs regarding feasibility of telehealth (1)                       |
| B9     | Busy work schedules and administrative burden hindered testing/using e-Exercise in their practice                | Lack of time due to other demands (or not further specified) (5)                        |
| B10    | Reduced face-to-face contact interfered with professional autonomy                                               | Challenges for HCPs regarding lack of physical/visual contact (1)                       |
| B11    | Absence of national e-Health guideline or standard                                                               | Other challenges for HCPs regarding feasibility of telehealth (1)                       |
| B12    | Loss of income due to substitution of face-to-face session                                                       | Other challenges for HCPs regarding feasibility of telehealth (1)                       |
| B13    | E-Exercise does not/might not contain all essential elements for the treatment of hip/knee OA (*)                | Non-optimal content or structure of LIs (1)                                             |
| B14    | I do not/might not have enough influence on the content of patients' individual e-Exercise program (*)           | Insufficient ability to provide personalized treatment within LIs (1)                   |
| B15    | The content of e-Exercise is not/might not be aligned with my opinion about treating patients with OA (*)        | Non-optimal content or structure of LIs (1)                                             |
| B16    | The intervention provided through e-Exercise is not/might not be appropriate for the average patient with OA (*) | Non-optimal content or structure of LIs (1)                                             |
| B17    | I do not/might not experience that e-Exercise supports patients in doing their exercises at home (*)             | Disadvantages of telehealth in terms of effectiveness (1)                               |
| B18    | Patients who were treated with e-Exercise were (perhaps) not generally positive about the intervention (*)       | Non-optimal content or structure of LIs (1)                                             |
| F1     | More flexibility in web-based application (intervention duration, number of sets/repetitions, type of exercises) | Ability and importance of providing personalized treatment within LIs (1)               |
| F2     | Completeness of web-based application (exercises/assignments/information)                                        | Positive experiences with or suggestions to improve the content or structure of LIs (1) |
| F3     | Perception that e-Exercise is an appropriate treatment option for subgroup of OA patients                        | Positive experiences with or suggestions to improve the content or structure of LIs (1) |
| F4     | Added value in terms of exercise adherence (important factor to use web-based                                    | Benefits of telehealth in terms of effectiveness (1)                                    |

|     |                                                                                                                        |                                                                                                  |
|-----|------------------------------------------------------------------------------------------------------------------------|--------------------------------------------------------------------------------------------------|
|     | application)                                                                                                           |                                                                                                  |
| F5  | Perceiving web-based application as time-saving                                                                        | Adequate duration of specific interventions or protocols (5)                                     |
| F6  | More flexibility in intervention (more possibilities to personalize to individual needs)                               | Ability and importance of providing personalized treatment within LIs (1)                        |
| F7  | Support from colleagues                                                                                                | Good interdisciplinary collaboration or healthcare provision, or suggestions for improvement (4) |
| F8  | Advantage of reducing number of treatments                                                                             | Positive attitude or needs of HCPs regarding feasibility of telehealth (1)                       |
| F9  | Offering an innovative intervention attracted new patients                                                             | Positive attitude or needs of HCPs regarding feasibility of telehealth (1)                       |
| F10 | The instruction course and manual assisted me so that I knew how to work with e-Exercise (*)                           | Ease for HCPs during delivery of LIs (1)                                                         |
| F11 | That it results in less income is not/might not be a major disadvantage of e-Exercise (*)                              | Positive attitude or needs of HCPs regarding feasibility of telehealth (1)                       |
| F12 | Our physiotherapy practice has the intention to use e-Health innovations (*)                                           | Positive attitude or needs of HCPs regarding feasibility of telehealth (1)                       |
| F13 | I do not/might not have insufficient time available to get familiar with e-Exercise and to use the web-application (*) | Adequate duration of specific interventions or protocols (5)                                     |
| F14 | I believe that patient data gathered at the e-Exercise web-application is stored safely (*)                            | Telehealth is safe for patients or patient/data privacy (1)                                      |

## Preferred Reporting Items for Systematic reviews and Meta-Analyses extension for Scoping Reviews (PRISMA-ScR) Checklist

| SECTION                                               | ITEM | PRISMA-ScR CHECKLIST ITEM                                                                                                                                                                                                                                                                                  | REPORTED ON PAGE #  |
|-------------------------------------------------------|------|------------------------------------------------------------------------------------------------------------------------------------------------------------------------------------------------------------------------------------------------------------------------------------------------------------|---------------------|
| <b>TITLE</b>                                          |      |                                                                                                                                                                                                                                                                                                            |                     |
| Title                                                 | 1    | Identify the report as a scoping review.                                                                                                                                                                                                                                                                   | Page 1              |
| <b>ABSTRACT</b>                                       |      |                                                                                                                                                                                                                                                                                                            |                     |
| Structured summary                                    | 2    | Provide a structured summary that includes (as applicable): background, objectives, eligibility criteria, sources of evidence, charting methods, results, and conclusions that relate to the review questions and objectives.                                                                              | Page 2-3            |
| <b>INTRODUCTION</b>                                   |      |                                                                                                                                                                                                                                                                                                            |                     |
| Rationale                                             | 3    | Describe the rationale for the review in the context of what is already known. Explain why the review questions/objectives lend themselves to a scoping review approach.                                                                                                                                   | Page 4-5            |
| Objectives                                            | 4    | Provide an explicit statement of the questions and objectives being addressed with reference to their key elements (e.g., population or participants, concepts, and context) or other relevant key elements used to conceptualize the review questions and/or objectives.                                  | Page 5              |
| <b>METHODS</b>                                        |      |                                                                                                                                                                                                                                                                                                            |                     |
| Protocol and registration                             | 5    | Indicate whether a review protocol exists; state if and where it can be accessed (e.g., a Web address); and if available, provide registration information, including the registration number.                                                                                                             | Page 5              |
| Eligibility criteria                                  | 6    | Specify characteristics of the sources of evidence used as eligibility criteria (e.g., years considered, language, and publication status), and provide a rationale.                                                                                                                                       | Page 6              |
| Information sources*                                  | 7    | Describe all information sources in the search (e.g., databases with dates of coverage and contact with authors to identify additional sources), as well as the date the most recent search was executed.                                                                                                  | Page 6              |
| Search                                                | 8    | Present the full electronic search strategy for at least 1 database, including any limits used, such that it could be repeated.                                                                                                                                                                            | Supplemental File 1 |
| Selection of sources of evidence†                     | 9    | State the process for selecting sources of evidence (i.e., screening and eligibility) included in the scoping review.                                                                                                                                                                                      | Page 6-7            |
| Data charting process‡                                | 10   | Describe the methods of charting data from the included sources of evidence (e.g., calibrated forms or forms that have been tested by the team before their use, and whether data charting was done independently or in duplicate) and any processes for obtaining and confirming data from investigators. | Page 7-9            |
| Data items                                            | 11   | List and define all variables for which data were sought and any assumptions and simplifications made.                                                                                                                                                                                                     | Page 7-9            |
| Critical appraisal of individual sources of evidence§ | 12   | If done, provide a rationale for conducting a critical appraisal of included sources of evidence; describe the methods used and how this information was used in any data synthesis (if appropriate).                                                                                                      | Page 7-8            |
| Synthesis of results                                  | 13   | Describe the methods of handling and summarizing the data that were charted.                                                                                                                                                                                                                               | Page 9              |

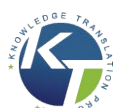

| SECTION                                       | ITEM | PRISMA-ScR CHECKLIST ITEM                                                                                                                                                                       | REPORTED ON PAGE #                             |
|-----------------------------------------------|------|-------------------------------------------------------------------------------------------------------------------------------------------------------------------------------------------------|------------------------------------------------|
| <b>RESULTS</b>                                |      |                                                                                                                                                                                                 |                                                |
| Selection of sources of evidence              | 14   | Give numbers of sources of evidence screened, assessed for eligibility, and included in the review, with reasons for exclusions at each stage, ideally using a flow diagram.                    | Figure 1<br>Page 9                             |
| Characteristics of sources of evidence        | 15   | For each source of evidence, present characteristics for which data were charted and provide the citations.                                                                                     | Table 1<br>Page 10                             |
| Critical appraisal within sources of evidence | 16   | If done, present data on critical appraisal of included sources of evidence (see item 12).                                                                                                      | Supplemental File 2<br>Page 11                 |
| Results of individual sources of evidence     | 17   | For each included source of evidence, present the relevant data that were charted that relate to the review questions and objectives.                                                           | Supplemental File 4                            |
| Synthesis of results                          | 18   | Summarize and/or present the charting results as they relate to the review questions and objectives.                                                                                            | Table 2-5<br>Supplemental File 3<br>Page 11-13 |
| <b>DISCUSSION</b>                             |      |                                                                                                                                                                                                 |                                                |
| Summary of evidence                           | 19   | Summarize the main results (including an overview of concepts, themes, and types of evidence available), link to the review questions and objectives, and consider the relevance to key groups. | Page 13-16                                     |
| Limitations                                   | 20   | Discuss the limitations of the scoping review process.                                                                                                                                          | Page 17-18                                     |
| Conclusions                                   | 21   | Provide a general interpretation of the results with respect to the review questions and objectives, as well as potential implications and/or next steps.                                       | Page 18-19                                     |
| <b>FUNDING</b>                                |      |                                                                                                                                                                                                 |                                                |
| Funding                                       | 22   | Describe sources of funding for the included sources of evidence, as well as sources of funding for the scoping review. Describe the role of the funders of the scoping review.                 | Page 19-20                                     |

JBI = Joanna Briggs Institute; PRISMA-ScR = Preferred Reporting Items for Systematic reviews and Meta-Analyses extension for Scoping Reviews.

\* Where *sources of evidence* (see second footnote) are compiled from, such as bibliographic databases, social media platforms, and Web sites.

† A more inclusive/heterogeneous term used to account for the different types of evidence or data sources (e.g., quantitative and/or qualitative research, expert opinion, and policy documents) that may be eligible in a scoping review as opposed to only studies. This is not to be confused with *information sources* (see first footnote).

‡ The frameworks by Arksey and O'Malley (6) and Levac and colleagues (7) and the JBI guidance (4, 5) refer to the process of data extraction in a scoping review as data charting.

§ The process of systematically examining research evidence to assess its validity, results, and relevance before using it to inform a decision. This term is used for items 12 and 19 instead of "risk of bias" (which is more applicable to systematic reviews of interventions) to include and acknowledge the various sources of evidence that may be used in a scoping review (e.g., quantitative and/or qualitative research, expert opinion, and policy document).

From: Tricco AC, Lillie E, Zarin W, O'Brien KK, Colquhoun H, Levac D, et al. PRISMA Extension for Scoping Reviews (PRISMA-ScR): Checklist and Explanation. *Ann Intern Med.* 2018;169:467–473. doi: 10.7326/M18-0850.



St. Michael's

Inspired Care.  
Inspiring Science.

For peer review only - <http://bmjopen.bmj.com/site/about/guidelines.xhtml>
