# Supplementary material for: Barriers and facilitators perceived by healthcare professionals for implementing lifestyle interventions in patients with osteoarthritis: a scoping review
Source: PubMed Central journal article supplement (PMC8808449; doi:10.1136/bmjopen-2021-056831), 2022-02-01
Supplement: bmjopen-2021-056831supp002.pdf [file bmjopen-2021-056831supp002.pdf]

**Supplemental File 2.** Quality assessment of the included studies based on the Mixed Methods Appraisal Tool<sup>a</sup>

| Reference <sup>b</sup>          | Screening questions <sup>c</sup> |    | 1. Qualitative <sup>d</sup> |     |     |     |     | 4. Quantitative descriptive <sup>e</sup> |     |     |     |     | 5. Mixed-methods <sup>f</sup> |     |     |     |     |
|---------------------------------|----------------------------------|----|-----------------------------|-----|-----|-----|-----|------------------------------------------|-----|-----|-----|-----|-------------------------------|-----|-----|-----|-----|
|                                 | S1                               | S2 | 1.1                         | 1.2 | 1.3 | 1.4 | 1.5 | 4.1                                      | 4.2 | 4.3 | 4.4 | 4.5 | 5.1                           | 5.2 | 5.3 | 5.4 | 5.5 |
| Allison (2019) [27]             | +                                | +  | +                           | +   | ?   | +   | +   |                                          |     |     |     |     |                               |     |     |     |     |
| Bossen (2016) [28] <sup>g</sup> | +                                | +  | ?                           | +   | ?   | -   | ?   |                                          |     |     |     |     |                               |     |     |     |     |
| Christiansen (2020) [29]        | +                                | +  | ?                           | +   | ?   | +   | +   |                                          |     |     |     |     |                               |     |     |     |     |
| Davis (2018) [30]               | +                                | +  | ?                           | +   | ?   | -   | ?   |                                          |     |     |     |     |                               |     |     |     |     |
| De Rooij (2014) [31]            | +                                | +  | ?                           | +   | ?   | -   | ?   |                                          |     |     |     |     |                               |     |     |     |     |
| Egerton (2017) [32]             | +                                | +  | ?                           | +   | ?   | +   | +   |                                          |     |     |     |     |                               |     |     |     |     |
| Egerton (2018) [33]             | +                                | +  | ?                           | +   | ?   | +   | +   |                                          |     |     |     |     |                               |     |     |     |     |
| Hinman (2016) [34]              | +                                | +  | +                           | +   | +   | +   | +   |                                          |     |     |     |     |                               |     |     |     |     |
| Hinman (2017) [35]              | +                                | +  | ?                           | +   | ?   | +   | +   |                                          |     |     |     |     |                               |     |     |     |     |
| Knoop (2020) [36]               | +                                | +  | ?                           | +   | ?   | -   | ?   |                                          |     |     |     |     |                               |     |     |     |     |
| Law (2019) [37]                 | +                                | +  | ?                           | +   | ?   | +   | +   |                                          |     |     |     |     |                               |     |     |     |     |
| Lawford (2019) [38]             | +                                | +  | ?                           | +   | ?   | +   | +   |                                          |     |     |     |     |                               |     |     |     |     |
| Lawford (2020) [39]             | +                                | +  | ?                           | +   | ?   | +   | +   |                                          |     |     |     |     |                               |     |     |     |     |
| Lawford (2021) [40]             | +                                | +  | ?                           | +   | ?   | +   | +   |                                          |     |     |     |     |                               |     |     |     |     |
| MacKay (2018) [41]              | +                                | +  | ?                           | +   | ?   | +   | +   |                                          |     |     |     |     |                               |     |     |     |     |
| MacKay (2020) [42]              | +                                | +  | ?                           | +   | ?   | +   | +   |                                          |     |     |     |     |                               |     |     |     |     |
| Mann (2011) [43]                | +                                | +  | ?                           | +   | ?   | +   | +   |                                          |     |     |     |     |                               |     |     |     |     |
| Miller (2020) [44]              | +                                | +  | ?                           | +   | ?   | -   | +   |                                          |     |     |     |     |                               |     |     |     |     |
| Nielsen (2014) [45]             | +                                | +  | ?                           | +   | ?   | +   | +   |                                          |     |     |     |     |                               |     |     |     |     |
| Okwera (2019) [46]              | +                                | +  | ?                           | +   | ?   | +   | +   |                                          |     |     |     |     |                               |     |     |     |     |
| Poitras (2010) [47]             | +                                | +  | ?                           | +   | ?   | -   | +   |                                          |     |     |     |     |                               |     |     |     |     |
| Rosemann (2006) [48]            | +                                | +  | ?                           | +   | ?   | -   | ?   |                                          |     |     |     |     |                               |     |     |     |     |
| Selten (2017) [49]              | +                                | +  | ?                           | +   | ?   | +   | +   |                                          |     |     |     |     |                               |     |     |     |     |
| Tang (2020) [50]                | +                                | +  | ?                           | +   | ?   | +   | +   |                                          |     |     |     |     |                               |     |     |     |     |
| Teo (2020) [51]                 | +                                | +  | ?                           | +   | ?   | +   | +   |                                          |     |     |     |     |                               |     |     |     |     |
| Wallis (2020) [52]              | +                                | +  | ?                           | +   | ?   | +   | +   |                                          |     |     |     |     |                               |     |     |     |     |
| Cottrell (2016) [53]            | +                                | +  |                             |     |     |     |     | +                                        | +   | +   | -   | +   |                               |     |     |     |     |
| Duarte (2019) [54]              | +                                | +  |                             |     |     |     |     | +                                        | ?   | +   | +   | ?   |                               |     |     |     |     |
| Hill (2018) [55]                | +                                | +  |                             |     |     |     |     | +                                        | ?   | +   | -   | +   |                               |     |     |     |     |
| Hill (2018) [56]                | +                                | +  |                             |     |     |     |     | -                                        | ?   | +   | ?   | +   |                               |     |     |     |     |
| Hofstede (2016) [57]            | +                                | +  |                             |     |     |     |     | +                                        | ?   | +   | -   | +   |                               |     |     |     |     |
| Lawford (2018) [58]             | +                                | +  |                             |     |     |     |     | +                                        | ?   | +   | ?   | +   |                               |     |     |     |     |

|                      |   |   |   |   |   |   |   |   |   |   |   |   |   |   |   |   |   |
|----------------------|---|---|---|---|---|---|---|---|---|---|---|---|---|---|---|---|---|
| Reid (2014) [59]     | + | + |   |   |   |   |   | + | ? | + | - | + |   |   |   |   |   |
| De Rooij (2020) [60] | + | + | ? | + | ? | - | ? | + | ? | + | + | + | ? | + | ? | + | - |
| Holden (2009) [61]   | + | + | ? | + | ? | + | + | + | ? | + | - | + | + | + | + | + | - |
| Kloek (2020) [62]    | + | + | ? | + | ? | + | + | + | ? | + | - | + | + | + | ? | - | - |

<sup>a</sup> + = yes; - = no, ? = can't tell

<sup>b</sup> The numbers in brackets ('[...]') correspond to the reference numbers used in the main text of the manuscript.

<sup>c</sup> S1 = Are there clear research questions?; S2 = Do the collected data allow to address the research questions?

<sup>d</sup> 1.1 = Is the qualitative approach appropriate to answer the research question?; 1.2 = Are the qualitative data collection methods adequate to address the research question?; 1.3 = Are the findings adequately derived from the data?; 1.4 = Is the interpretation of results sufficiently substantiated by data?; 1.5 = Is there coherence between qualitative data sources, collection, analysis and interpretation?

<sup>e</sup> 4.1 = Is the sampling strategy relevant to address the research question?; 4.2 = Is the sample representative of the target population?; 4.3 = Are the measurements appropriate?; 4.4 = Is the risk of nonresponse bias low?; 4.5 = Is the statistical analysis appropriate to answer the research question?

<sup>f</sup> 5.1 = Is there an adequate rationale for using a mixed methods design to address the research question?; 5.2 = Are the different components of the study effectively integrated to answer the research question?; 5.3 = Are the outputs of the integration of qualitative and quantitative components adequately interpreted?; 5.4 = Are divergences and inconsistencies between quantitative and qualitative results adequately addressed?; 5.5 = Do the different components of the study adhere to the quality criteria of each tradition of the methods involved?

<sup>g</sup> The MMAT was only applied to the section regarding the pilot study on the feasibility of the blended intervention.
