# Supplementary material for: Barriers and facilitators perceived by healthcare professionals for implementing lifestyle interventions in patients with osteoarthritis: a scoping review
Source: PubMed Central journal article supplement (PMC8808449; doi:10.1136/bmjopen-2021-056831), 2022-02-01
Supplement: bmjopen-2021-056831supp003.pdf [file bmjopen-2021-056831supp003.pdf]

### Supplemental File 3. Full overview of all extracted factors per domain

#### Explanation

- In the tables below, all extracted factors per subcategory of each domain are presented. The colors of the subcategories correspond to barriers (red), facilitators (green) or unclear factors (orange).
- Column “Description”: (\*) at the end of the description indicates that the factor is derived from a close-ended question or attitude statement.
- Column “Reference”: the numbers in brackets (‘[...]’) correspond to the reference numbers used in the main text of the manuscript.
- Abbreviations: ACSM: American College of Sports Medicine; BMI: body mass index; CBT: cognitive behavioral therapy; CKP: chronic knee pain; CPG: clinical practice guideline; GP: general practitioner; HCP: healthcare professional; LI: lifestyle intervention; LMP: Lifestyle Management Programme; NSAID: non-steroidal anti-inflammatory drug; NWBE: non-weight bearing quadriceps strengthening exercise; OA: osteoarthritis; PCST: pain coping skills training; PT: physiotherapist; RCT: randomized controlled trial; TKA: total knee arthroplasty; TJA: total joint arthroplasty; WBE: weight bearing functional exercise.

#### Domain 1: Intervention factors

##### Effectiveness

| Description                                                                                                          | Reference                |
|----------------------------------------------------------------------------------------------------------------------|--------------------------|
| LI have little or no effect on OA (barrier)                                                                          |                          |
| Not certain that exercise works                                                                                      | Christiansen (2020) [29] |
| Advice to exercise and lose weight does not work                                                                     | Egerton (2017) [32]      |
| Dubious about effect of exercise and weight-management advice on reducing symptoms                                   | Egerton (2018) [33]      |
| Surgical methods have the best outcomes                                                                              | Miller (2020) [44]       |
| Lack of confidence in clinical effectiveness of physiotherapy treatments                                             | Okwera (2019) [46]       |
| Limited impact of weight loss on established knee OA (more effective as a primary prevention strategy)               | Poitras (2010) [47]      |
| Questioning direct relationship between weight and knee OA (numerous other factors associated)                       | Poitras (2010) [47]      |
| Less certain about effectiveness of physical therapy (benefits variable or difficult to prove)                       | Selten (2017) [49]       |
| Increasing the overall activity levels does not/might not stop the knee problem getting worse (*)                    | Cottrell (2016) [53]     |
| There is a paucity of evidence in regards to the effectiveness of physiotherapy treatment for OA hip and/or knee (*) | Reid (2014) [59]         |
| Past experience has shown physiotherapy to be ineffective (*)                                                        | Reid (2014) [59]         |
| Increasing overall activity levels does not/might not stop the knee problem getting worse (*)                        | Holden (2009) [61]       |
| Increasing the strength of the muscles around the knee does not/might not stop the knee problem getting worse (*)    | Holden (2009) [61]       |
| Knee problems are not/might not be improved by general exercise (*)                                                  | Holden (2009) [61]       |
| Potential effects of LIs are difficult to accomplish (barrier)                                                       |                          |
| Weight loss is difficult (multiplicity of factors need to be addressed, often involving change in lifestyle)         | Poitras (2010) [47]      |

|                                                                                                            |                      |
|------------------------------------------------------------------------------------------------------------|----------------------|
| Vicious circle (pain when exercising, people move less/eat more due to frustration/sometimes depression)   | Rosemann (2006) [48] |
| Achieving patient behavior change is difficult (*)                                                         | Cottrell (2016) [53] |
| Human nature (as patient-centered barrier to adherence)                                                    | Holden (2009) [61]   |
| LIs have positive effects on affected joint(s) (facilitator)                                               |                      |
| Functional improvements experienced by patients                                                            | Hinman (2017) [35]   |
| Improvements in patient pain and function                                                                  | Lawford (2019) [38]  |
| Large improvements in knee pain                                                                            | Lawford (2021) [40]  |
| Treatment could improve clients' symptoms (e.g. reduce pain, increase function)                            | MacKay (2018) [41]   |
| Treatment could potentially slow progression of symptoms                                                   | MacKay (2018) [41]   |
| Improve people's symptoms early in treatment (to gain buy-in)                                              | MacKay (2020) [42]   |
| Benefits of activity on knee mobility                                                                      | Poitras (2010) [47]  |
| Activity necessary for the knee's health                                                                   | Poitras (2010) [47]  |
| Weight loss improves pain and joint function                                                               | Poitras (2010) [47]  |
| Benefits of weight reduction for relieving symptoms of knee/hip OA                                         | Selten (2017) [49]   |
| Beneficial effects of physical therapy in reducing pain/stiffness and potential effects on cartilage       | Selten (2017) [49]   |
| Exercise therapy may be effective by giving more muscular support for joints                               | Wallis (2020) [52]   |
| Knee problems are improved by quadriceps strengthening exercises (*)                                       | Cottrell (2016) [53] |
| Knee problems are improved by general exercise (e.g. walking or swimming) (*)                              | Cottrell (2016) [53] |
| Increasing the strength of the muscles around the knee stops the knee problem getting worse (*)            | Cottrell (2016) [53] |
| Exercise is beneficial for OA (*)                                                                          | Lawford (2018) [58]  |
| Knee problems are improved by local strengthening exercises (*)                                            | Holden (2009) [61]   |
| LIs have positive effects on general health (facilitator)                                                  |                      |
| Lifestyle treatments benefited other chronic conditions                                                    | Egerton (2018) [33]  |
| Rapid weight loss was primary driver of motivation                                                         | Lawford (2021) [40]  |
| Benefits of activity on general wellbeing                                                                  | Poitras (2010) [47]  |
| Weight loss effective at improving mobility in general                                                     | Poitras (2010) [47]  |
| Weight loss also benefits mobility in general                                                              | Poitras (2010) [47]  |
| Beneficial effects of physical therapy in reducing weight and for increasing mobility/posture/coordination | Selten (2017) [49]   |
| Community interventions are effective at achieving sufficient and sustained weight loss (*)                | Hill (2018) [56]     |
| Patients benefit from weight loss (*)                                                                      | Hofstede (2016) [57] |
| LIs have positive mental effects (facilitator)                                                             |                      |
| Enthusiastic about the program and described the results (e.g. it was empowering)                          | Davis (2018) [30]    |
| Greater confidence to exercise among patients                                                              | Hinman (2017) [35]   |
| Reminding patients of opportunity to self-manage                                                           | Law (2019) [37]      |
| Increased confidence to self-manage                                                                        | Lawford (2019) [38]  |
| Positive lifestyle changes (patients) (e.g. thinking differently)                                          | Lawford (2021) [40]  |
| Physical therapy useful in increasing patients self-management in coping with/acceptance of symptoms       | Selten (2017) [49]   |

|                                                                                                          |                      |
|----------------------------------------------------------------------------------------------------------|----------------------|
| Exercise therapy may be effective by giving opportunity to improve confidence about activities/mobility  | Wallis (2020) [52]   |
| Non-surgical treatments motivate patients to do things themselves (*)                                    | Hofstede (2016) [57] |
| LIs have positive effects (not further specified) (facilitator)                                          |                      |
| Positive impact on patients of personalized attention from coach and from advice/education they provided | Hinman (2016) [34]   |
| Emphasising health benefits of programme                                                                 | Law (2019) [37]      |
| Physical therapy helpful for patients most of the time                                                   | Miller (2020) [44]   |
| Value of lifestyle advice related to knee and hip OA                                                     | Selten (2017) [49]   |
| Non-pharmacological, non-surgical treatment was considered useful to delay surgery                       | Selten (2017) [49]   |
| Positive about program (alternative approach and opportunity to avoid a joint replacement)               | Wallis (2020) [52]   |
| Improvement in the physical condition of participants                                                    | Duarte (2019) [54]   |
| Good results of physical therapy (*)                                                                     | Hofstede (2016) [57] |

### Safety

| Description                                                                                                           | Reference            |
|-----------------------------------------------------------------------------------------------------------------------|----------------------|
| LIs are unsafe or have negative effects (barrier)                                                                     |                      |
| Being apprehensive about aggravating pain in patients                                                                 | Lawford (2020) [39]  |
| Tending to avoid pushing patients in usual clinical practice                                                          | Lawford (2020) [39]  |
| Potential further damage to the knee due to activity                                                                  | Poitras (2010) [47]  |
| Urging caution to patients about participating in higher impact exercise/activities                                   | Wallis (2020) [52]   |
| Fear of increasing symptoms (as barrier to prescribing exercise)                                                      | Holden (2009) [61]   |
| Causing disease progression, particularly through weight-bearing activities (as barrier to prescribing exercise)      | Holden (2009) [61]   |
| Exacerbating patient's comorbidities (as barrier to prescribing exercise)                                             | Holden (2009) [61]   |
| General exercise is not/might not be safe for everybody to do (*)                                                     | Holden (2009) [61]   |
| Local strengthening exercises for the knee are not/might not be safe for everybody to do (*)                          | Holden (2009) [61]   |
| LIs are safe (facilitator)                                                                                            |                      |
| Quadriceps strengthening exercises for the knee are safe for everybody to do (*)                                      | Cottrell (2016) [53] |
| General exercise (e.g. walking or swimming) is safe for everybody to do (*)                                           | Cottrell (2016) [53] |
| Only few drawbacks for the use of non-surgical treatments (*)                                                         | Hofstede (2016) [57] |
| Research environment or protocols provide a safety net (facilitator)                                                  |                      |
| Less afraid to increase training intensity (preventing adverse events by tailoring programs to individual's capacity) | De Rooij (2014) [31] |
| Safety net provided by research environment (e.g. patients were previously screened for comorbidities/red flags)      | Hinman (2017) [35]   |
| There was a safety net in place with the trial (each patient had been screened)                                       | Lawford (2019) [38]  |
| Experiences in study helped them push patients through more pain than they would have previously                      | Lawford (2020) [39]  |

### Design

| Description                                                                                                       | Reference            |
|-------------------------------------------------------------------------------------------------------------------|----------------------|
| <b>Non-optimal content or structure of LIs (barrier)</b>                                                          |                      |
| Structure/timing of exercise program restricted capacity to modify exercises/provide adequate follow-up           | Hinman (2016) [34]   |
| Maximum number of four sessions was considered too low in many patients                                           | Knoop (2020) [36]    |
| Behavioral approach in exercise therapy and advice to visit GP were considered unnecessary for most patients      | Knoop (2020) [36]    |
| Program factors (e.g. single discipline led intervention)                                                         | Wallis (2020) [52]   |
| Services do not meet expectations (*)                                                                             | Cottrell (2016) [53] |
| E-Exercise does not/might not contain all essential elements for the treatment of hip/knee OA (*)                 | Kloek (2020) [62]    |
| The content of e-Exercise is not/might not be aligned with my opinion about treating patients with OA (*)         | Kloek (2020) [62]    |
| The intervention provided through e-Exercise is not/might not be appropriate for the average patient with OA (*)  | Kloek (2020) [62]    |
| Patients who were treated with e-Exercise were (perhaps) not generally positive about the intervention (*)        | Kloek (2020) [62]    |
| <b>Challenges for patients during participation in LIs (barrier)</b>                                              |                      |
| Mental effort required for WBE program was challenging for patients                                               | Lawford (2020) [39]  |
| Physical challenge was the complexity of WBE program                                                              | Lawford (2020) [39]  |
| Straight leg raise challenging in NWBE program                                                                    | Lawford (2020) [39]  |
| Volume of resources could be overwhelming/confusing for some patients                                             | Lawford (2021) [40]  |
| Difficulty for patients with PCST component (cognitive restructuring techniques)                                  | Nielsen (2014) [45]  |
| <b>Challenges for HCPs during delivery of LIs (barrier)</b>                                                       |                      |
| e-Exercise must be adapted for suitable integration into practice (e.g. no insight into modules patients receive) | Bossen (2016) [28]   |
| Class required intense supervision, which was difficult to provide when most participants were new                | Davis (2018) [30]    |
| Challenges of supervision when space did not allow clear line of sight                                            | Davis (2018) [30]    |
| Challenges associated with cuff weights used to apply resistance in NWBE program                                  | Lawford (2020) [39]  |
| The lay out of the protocol does not/might not facilitate its usage in daily practice (*)                         | De Rooij (2020) [60] |
| Clarity of instruction manual and course (lack of)                                                                | Kloek (2020) [62]    |
| <b>Positive experiences with or suggestions for improving the content or structure of LIs (facilitator)</b>       |                      |
| Positive feedback regarding the content of e-Exercise                                                             | Bossen (2016) [28]   |
| First education session was critical to reducing the participant's anxiety related to exercising                  | Davis (2018) [30]    |
| Importance of empowering the patients rather than 'pushing' them, achieved by 'giving choices'                    | Davis (2018) [30]    |
| Positive comments about the exercise regimen                                                                      | Hinman (2016) [34]   |
| Structure provided by protocol/structure of exercises (how patients included them into daily routine)             | Hinman (2016) [34]   |
| Multidisciplinary nature of LMP (whole-person, intensive and functional approach)                                 | Law (2019) [37]      |
| Standardization was viewed as important for monitoring and evaluation purposes                                    | Law (2019) [37]      |
| Helpful social impact of group-based programme                                                                    | Law (2019) [37]      |
| Long-term follow-up consultations would be beneficial                                                             | Lawford (2021) [40]  |
| Extremely positive about educational resources provided                                                           | Lawford (2021) [40]  |
| More information about healthy eating beyond meal replacement phase could be included                             | Lawford (2021) [40]  |
| Exercise/physical activity program was an important part of intervention                                          | Lawford (2021) [40]  |

|                                                                                                                                                   |                      |
|---------------------------------------------------------------------------------------------------------------------------------------------------|----------------------|
| Favorably comments on program content (positive way to help people be proactive about their pain)                                                 | Nielsen (2014) [45]  |
| Importance of PCST component (cognitive restructuring techniques)                                                                                 | Nielsen (2014) [45]  |
| Structure of PCST sessions (overview/practice review/covering new skill/practice planning) worked well                                            | Nielsen (2014) [45]  |
| A more holistic program as part of a multidisciplinary model of service was preferred                                                             | Wallis (2020) [52]   |
| Value of program's structure and peer (group) support                                                                                             | Wallis (2020) [52]   |
| Name of program ('Good Life with OsteoArthritis') implied optimism and positive outcome                                                           | Wallis (2020) [52]   |
| Received positive feedback from their patients about program                                                                                      | Wallis (2020) [52]   |
| Some contents of the protocol are not/might not be incorrect (*)                                                                                  | De Rooij (2020) [60] |
| The protocol is applicable to OA patients with comorbidity that I see in my clinical practice (*)                                                 | De Rooij (2020) [60] |
| Important to extend the intake phase to at least to 45 min                                                                                        | De Rooij (2020) [60] |
| Completeness of web-based application (exercises/assignments/information)                                                                         | Kloek (2020) [62]    |
| Perception that e-Exercise is an appropriate treatment option for subgroup of OA patients                                                         | Kloek (2020) [62]    |
| Ease for patients during participation in LIs (facilitator)                                                                                       |                      |
| NWBE program was generally easier for patients to follow (mental effort)                                                                          | Lawford (2020) [39]  |
| Simplicity and convenience of meal replacements                                                                                                   | Lawford (2021) [40]  |
| Providing trial of sessions to assist patients to get started (suggestion for promotion and referrals)                                            | Wallis (2020) [52]   |
| Ease for HCPs during delivery of LIs (facilitator)                                                                                                |                      |
| Initial classes needed to be small with rolling recruitment very beneficial                                                                       | Davis (2018) [30]    |
| List of restrictions for exercise therapy was conveniently arranged checklist for diagnostic and treatment phases                                 | De Rooij (2014) [31] |
| Suggestion to increase feasibility by reducing the protocols to three main protocols                                                              | De Rooij (2014) [31] |
| Requirements of treatment protocol freed therapists to notice and reflect on impact of the interventions                                          | Hinman (2016) [34]   |
| Structured protocol allowed to experience different OA treatment regimen/observe and learn from impact                                            | Hinman (2016) [34]   |
| NWBE program was easier to prescribe (mental effort)                                                                                              | Lawford (2020) [39]  |
| Easier to prescribe and progress NWBE than WBE program (physical complexity)                                                                      | Lawford (2020) [39]  |
| Training workshop as good introduction to content and process of delivering PCST program                                                          | Nielsen (2014) [45]  |
| Weekly group interaction crucial to being able to deliver intervention effectively/problem-solve issues                                           | Nielsen (2014) [45]  |
| Input from supervising psychologist crucial to being able to deliver intervention effectively/problem-solve issues                                | Nielsen (2014) [45]  |
| Would have liked more role-playing experience prior to beginning trial treatments                                                                 | Nielsen (2014) [45]  |
| Regular group meetings were considered very important (if not essential) for delivery of PCST program                                             | Nielsen (2014) [45]  |
| Value of having a psychologist involved throughout the program, their professional input was helpful                                              | Nielsen (2014) [45]  |
| The recommendations over adapting the diagnostic phase (history taking and physical examination) in the protocol are clear and understandable (*) | De Rooij (2020) [60] |
| The recommendations over adapting the OA exercise therapy in the protocol are clear and understandable (*)                                        | De Rooij (2020) [60] |
| Useful to plan follow up/refreshment training to repeat/discuss content of course/protocol and application                                        | De Rooij (2020) [60] |
| Shortening the protocol would increase user-friendliness                                                                                          | De Rooij (2020) [60] |
| The instruction course and manual assisted me so that I knew how to work with e-Exercise (*)                                                      | Kloek (2020) [62]    |

### Personalized treatment

| Description                                                                                                                     | Reference            |
|---------------------------------------------------------------------------------------------------------------------------------|----------------------|
| <b>Insufficient ability to provide personalized treatment within LIs (barrier)</b>                                              |                      |
| Concerned the service would not be able to provide individualized management for a very diverse population                      | Egerton (2017) [32]  |
| Requirements of RCT potentially created a barrier to responding to where the client was                                         | Nielsen (2014) [45]  |
| Less satisfied about the applicability of e-Exercise for only one diagnosis                                                     | Kloek (2020) [62]    |
| I do not/might not have enough influence on the content of patients' individual e-Exercise program (*)                          | Kloek (2020) [62]    |
| <b>Ability and importance of providing personalized treatment within LIs (facilitator)</b>                                      |                      |
| Flexibility was valuable when tackling local participation challenges                                                           | Law (2019) [37]      |
| Tailoring exercise programs to individual patient would overcome some challenges                                                | Lawford (2020) [39]  |
| Tailoring treatment to a person's goals/interests                                                                               | MacKay (2020) [42]   |
| Need to consider personal context by integrating people's home exercises into daily activities/other life demands               | MacKay (2020) [42]   |
| Some modules worked better than others (depending on the individual patient and context)                                        | Nielsen (2014) [45]  |
| The belief that a more flexible approach responsive to patient needs was required in their practice                             | Nielsen (2014) [45]  |
| Exercise programs have to be individualized to each patient by the PT                                                           | Poitras (2010) [47]  |
| Importance of tailored exercise program                                                                                         | Teo (2020) [51]      |
| Exercise for CKP is most beneficial when it is tailored to meet individual patient needs (*)                                    | Cottrell (2016) [53] |
| A standard set of exercises is not/might not be sufficient for every patient with chronic knee problems (*)                     | Cottrell (2016) [53] |
| The protocol gives the opportunity to make your own decisions regarding history taking, physical examination, and treatment (*) | De Rooij (2020) [60] |
| A standard set of exercises is not/might not be sufficient for every patient with knee OA (*)                                   | Holden (2009) [61]   |
| Exercise for knee OA is most beneficial when it is tailored to meet individual patient needs (*)                                | Holden (2009) [61]   |
| More flexibility in web-based application (intervention duration, number of sets/repetitions, type of exercises)                | Kloek (2020) [62]    |
| More flexibility in intervention (more possibilities to personalize to individual needs)                                        | Kloek (2020) [62]    |

### Accessibility

| Description                                                                                                 | Reference            |
|-------------------------------------------------------------------------------------------------------------|----------------------|
| <b>LIs are unavailable or inaccessible (barrier)</b>                                                        |                      |
| Most of the patients did not meet study inclusion criteria                                                  | Bossen (2016) [28]   |
| Lack of availability of support services (e.g. community-based rehabilitation programs) in remote locations | Egerton (2018) [33]  |
| Long waiting lists for support services (e.g. community-based rehabilitation programs)                      | Egerton (2018) [33]  |
| Lack of infrastructure or local programmes (particularly in rural settings)                                 | MacKay (2018) [41]   |
| Clients often had a waiting period before accessing care                                                    | MacKay (2018) [41]   |
| Lack of facilities to promote continuing exercise in community                                              | Mann (2011) [43]     |
| Wait for physiotherapy was too long                                                                         | Mann (2011) [43]     |
| Inaccessible treatment options within organization                                                          | Miller (2020) [44]   |
| Limitations to accessing services (e.g. lack of facilities, costs) (*)                                      | Cottrell (2016) [53] |

|                                                                                                                 |                      |
|-----------------------------------------------------------------------------------------------------------------|----------------------|
| Weight management services are not/might not be adequately commissioned in my area (*)                          | Hill (2018) [56]     |
| Lack of availability of physiotherapy                                                                           | Reid (2014) [59]     |
| Poor links to community facilities such as local leisure centres                                                | Holden (2009) [61]   |
| <b>Costs of LIs to patients (barrier)</b>                                                                       |                      |
| Concern that uptake would be negatively impacted if patients were required to pay                               | Egerton (2017) [32]  |
| Concerns regarding financial cost to patients when considering referral to other services                       | Egerton (2018) [33]  |
| Cost was a factor in whether clients could access facilities/programmes                                         | MacKay (2018) [41]   |
| Costs to patients (lack of insurance coverage/high co-pays for specific services/time off work/travel expenses) | Miller (2020) [44]   |
| Costs (extrinsic barrier for patient adherence)                                                                 | Teo (2020) [51]      |
| Cost (program access barrier)                                                                                   | Wallis (2020) [52]   |
| <b>LIs are not feasible or sustainable (barrier)</b>                                                            |                      |
| Concern for overcomplicated system when service is not compatible/complementary with existing initiatives       | Egerton (2017) [32]  |
| Not seeing need (already adequate skills/resources to support OA patient self-management and lifestyle change)  | Egerton (2017) [32]  |
| Not seeing need (advice already given at their practice would be unhelpfully repeated)                          | Egerton (2017) [32]  |
| Concern regarding long-term service sustainability                                                              | Egerton (2017) [32]  |
| The addition of a care support team may add complexities to management                                          | Egerton (2017) [32]  |
| In my daily clinical practice I can (perhaps) not integrate working according to the protocol well (*)          | De Rooij (2020) [60] |
| I do not/might not treat enough patients with knee OA and comorbidity to apply the protocol (*)                 | De Rooij (2020) [60] |
| The protocol does not/might not fit well with my working methods of daily clinical practice (*)                 | De Rooij (2020) [60] |
| Total amount of knee OA patients with comorbidity was lower than expected                                       | De Rooij (2020) [60] |
| <b>Inconvenience to patients when accessing LIs (barrier)</b>                                                   |                      |
| Weather (extrinsic barrier for patient adherence)                                                               | Teo (2020) [51]      |
| Transport, waiting time and parking related to attendance (program access barrier)                              | Wallis (2020) [52]   |
| Geography (program access barrier)                                                                              | Wallis (2020) [52]   |
| Available session times (program access barrier)                                                                | Wallis (2020) [52]   |
| Geographical problems (e.g. remote location, scared to walk in local area) (*)                                  | Cottrell (2016) [53] |
| <b>LIs are available or accessible, or suggestions for improvement (facilitator)</b>                            |                      |
| More likely to engage with the care support team if it enabled more affordable/accessible allied health         | Egerton (2017) [32]  |
| LMP would benefit from extension of inclusion criteria (patients with less severe OA and lower BMI)             | Law (2019) [37]      |
| Benefits of having infrastructure and programmes available in their communities                                 | MacKay (2018) [41]   |
| Triage service (as suggestion for physiotherapy service improvement)                                            | Okwera (2019) [46]   |
| A web-based physiotherapy service (as suggestion for physiotherapy service improvement)                         | Okwera (2019) [46]   |
| Reduced waiting times (as suggestion for physiotherapy service improvement)                                     | Okwera (2019) [46]   |
| Availability of non-surgical treatments (*)                                                                     | Hofstede (2016) [57] |
| Good access to physiotherapy in area (*)                                                                        | Reid (2014) [59]     |
| <b>LIs are feasible or sustainable (facilitator)</b>                                                            |                      |
| Need for clarity about how the new service would integrate with existing schemes and payment structures         | Egerton (2017) [32]  |

|                                                                                                                                                       |                      |
|-------------------------------------------------------------------------------------------------------------------------------------------------------|----------------------|
| Seeing need (advice/recommendations may need to be reinforced/provided over several health care episodes)                                             | Egerton (2017) [32]  |
| Seeing need (extra time and encouragement for the patient would result in better outcomes)                                                            | Egerton (2017) [32]  |
| Importance of broad acceptance (patients/doctors/health service funders) if new service is to continue long term                                      | Egerton (2017) [32]  |
| Model of stratified care easy to apply and having added value for daily practice                                                                      | Knoop (2020) [36]    |
| Appreciation of applicability of treatment protocols                                                                                                  | Knoop (2020) [36]    |
| Further and ongoing evaluation of the LMP would help to address current challenges                                                                    | Law (2019) [37]      |
| Interventions in physical therapists' toolbox were not static (changed over time)                                                                     | MacKay (2020) [42]   |
| The protocol is feasible in daily clinical practice (*)                                                                                               | De Rooij (2020) [60] |
| In my daily clinical practice, I work with sufficient equipment (including blood pressure meter, saturation meter) to properly apply the protocol (*) | De Rooij (2020) [60] |
| I have changed my working method (due to the protocol) (*)                                                                                            | De Rooij (2020) [60] |
| Intake procedure is feasible and implementable                                                                                                        | De Rooij (2020) [60] |
| The more you apply the strategy in daily practice, the easier it is to integrate it in your daily working method                                      | De Rooij (2020) [60] |
| <b>Convenience for patients when accessing LIs (facilitator)</b>                                                                                      |                      |
| Close, convenient locations (suggestion for promotion and referrals)                                                                                  | Wallis (2020) [52]   |
| Appropriate session times for working populations (suggestion for promotion and referrals)                                                            | Wallis (2020) [52]   |
| Provision of free parking at health service (suggestion for promotion and referrals)                                                                  | Wallis (2020) [52]   |

### Telehealth

| Description                                                                                                                     | Reference           |
|---------------------------------------------------------------------------------------------------------------------------------|---------------------|
| <b>Disadvantages of telehealth in terms of effectiveness (barrier)</b>                                                          |                     |
| Remote (telephone) delivery is not as good as face-to-face particularly in relation to exercise advice                          | Egerton (2017) [32] |
| Inability of a remote service to provide locally relevant information                                                           | Egerton (2017) [32] |
| An exercise program prescribed by a PT over the telephone would not/might not improve a patient's OA (*)                        | Lawford (2018) [58] |
| I do not/might not experience that e-Exercise supports patients in doing their exercises at home (*)                            | Kloek (2020) [62]   |
| <b>Telehealth is not safe for patients or patient/data privacy (barrier)</b>                                                    |                     |
| Concerns about security of patient data and information confidentiality during the referral process                             | Egerton (2017) [32] |
| Using the telephone would not/might not be a safe way for patients to receive a PT-prescribed exercise program for their OA (*) | Lawford (2018) [58] |
| <b>Challenges for HCPs regarding lack of physical/visual contact (barrier)</b>                                                  |                     |
| Forced to modify usual habits/rely more on information shared by patients (instead of own physical assessment)                  | Hinman (2017) [35]  |
| Some discomfort without hands-on assessment (no palpation of patient's knee/hands-on facilitation of exercises)                 | Hinman (2017) [35]  |
| Assessment of patients could be difficult when consulting via telephone (inability to observe)                                  | Lawford (2019) [38] |
| Lack of visual/physical contact would limit strategies available when teaching patients an exercise program                     | Lawford (2019) [38] |
| I would not/might not be able to adequately monitor a patient's OA over the telephone (*)                                       | Lawford (2018) [58] |
| I do not/might not like that there would be no physical contact with an OA patient when consulting over the telephone (*)       | Lawford (2018) [58] |
| I do not/might not like that there would be no physical contact with an OA patient when consulting over the internet video (*)  | Lawford (2018) [58] |
| Reduced face-to-face contact interfered with professional autonomy                                                              | Kloek (2020) [62]   |



|                                                                                                                                                            |                     |
|------------------------------------------------------------------------------------------------------------------------------------------------------------|---------------------|
| <b>Other challenges for HCPs regarding feasibility of telehealth (barrier)</b>                                                                             |                     |
| Lack of financial incentive if blended intervention substitutes conventional visits (reduced venues per patient)                                           | Bossen (2016) [28]  |
| Hesitancy to embrace an unfamiliar new service                                                                                                             | Egerton (2017) [32] |
| Patient flexibility could come at a cost to the therapist sometimes (allowed patients to reschedule last minute)                                           | Hinman (2017) [35]  |
| Skype consultations more suitable as adjunctive to usual in-clinic care (initial assessment in person preferred)                                           | Hinman (2017) [35]  |
| Telephone not viewed as primary mode of providing care (only for follow-up)                                                                                | Lawford (2019) [38] |
| Some difficulty scheduling telephone consultations during usual day of face-to-face consultations                                                          | Lawford (2019) [38] |
| Using the telephone to consult with an OA patient and prescribe an exercise program would not/might not be easy for me (*)                                 | Lawford (2018) [58] |
| I would not/might not be as satisfied talking to an OA patient over the telephone as I would be talking to the patient in person in my consulting room (*) | Lawford (2018) [58] |
| I would not/might not be interested in being involved in a service offering PT-prescribed exercise over the telephone for my people with OA (*)            | Lawford (2018) [58] |
| Using the telephone would not/might not be an acceptable way for me to deliver an exercise program to patients with OA (*)                                 | Lawford (2018) [58] |
| Using the telephone would not/might not be a useful (practical) way for me to deliver an exercise program to patients with OA (*)                          | Lawford (2018) [58] |
| Using the telephone would not/might not be an effective way for me to deliver an exercise program to patients with OA (*)                                  | Lawford (2018) [58] |
| Technical skills (lack of)                                                                                                                                 | Kloek (2020) [62]   |
| Adaptive capacity to change treatment routines (lack of)                                                                                                   | Kloek (2020) [62]   |
| Absence of national e-Health guideline or standard                                                                                                         | Kloek (2020) [62]   |
| Loss of income due to substitution of face-to-face session                                                                                                 | Kloek (2020) [62]   |
| <b>Patient-related challenges regarding feasibility of telehealth (barrier)</b>                                                                            |                     |
| Most of the patients prefer traditional face-to-face treatments                                                                                            | Bossen (2016) [28]  |
| Hearing and cognitive difficulties as barriers for some patients to being able to interact with the service                                                | Egerton (2017) [32] |
| Skepticism about whether many patients would embrace such a model (i.e. because of remote-delivery aspect)                                                 | Egerton (2017) [32] |
| Lack of technology affinity (reason for patients' non-willingness to participate in e-Exercise)                                                            | Kloek (2020) [62]   |
| Patients preferred regular face-to-face contact                                                                                                            | Kloek (2020) [62]   |
| <b>Negative aspects regarding communication and relationship using telehealth (barrier)</b>                                                                |                     |
| Lack of face-to-face contact difficult/hampered ability to establish normal rapport/build effective relationships                                          | Hinman (2016) [34]  |
| Occasional technical difficulties (e.g. poor internet connection) could disrupt the flow of the consultation                                               | Hinman (2017) [35]  |
| Relationships with patients might be adversely impacted/could be difficult to develop rapport                                                              | Lawford (2019) [38] |
| Difficulties communicating might be experienced when consulting via telephone                                                                              | Lawford (2019) [38] |
| Video consultations made it more difficult to have emotional conversations/read non-verbal cues                                                            | Lawford (2021) [40] |
| <b>Benefits of telehealth in terms of effectiveness (facilitator)</b>                                                                                      |                     |
| Possibility to extend physical therapy treatment in patient's home environment                                                                             | Bossen (2016) [28]  |
| Potential to enhance the adherence of home exercises                                                                                                       | Bossen (2016) [28]  |
| Empowering effect of home environment on patient adherence with exercise program                                                                           | Hinman (2017) [35]  |
| Using Skype distilled focus to most important and effective treatment elements to facilitate self-management                                               | Hinman (2017) [35]  |
| Patients more relaxed in home environment/more receptive to the information the therapists provided                                                        | Hinman (2017) [35]  |
| Patients could be more comfortable talking about condition/engaging in exercise program from own home                                                      | Lawford (2019) [38] |

|                                                                                                                                                   |                     |
|---------------------------------------------------------------------------------------------------------------------------------------------------|---------------------|
| Telephone-delivered care could provide increased opportunities to educate patients about OA                                                       | Lawford (2019) [38] |
| Patient adherence to telephone-delivered exercise program was high                                                                                | Lawford (2019) [38] |
| An exercise program prescribed by a PT over the internet video would improve a patient's OA (*)                                                   | Lawford (2018) [58] |
| Added value in terms of exercise adherence (important factor to use web-based application)                                                        | Kloek (2020) [62]   |
| Telehealth is safe for patients or patient/data privacy (facilitator)                                                                             |                     |
| Home environment facilitated correct and safe exercise techniques                                                                                 | Hinman (2017) [35]  |
| A patient's privacy would not be violated if I prescribed them an exercise program over the telephone (*)                                         | Lawford (2018) [58] |
| A patient's privacy would not be violated if I prescribed them an exercise program over the internet video (*)                                    | Lawford (2018) [58] |
| Using the internet video would be a safe way for patients to receive a PT-prescribed exercise program for their OA (*)                            | Lawford (2018) [58] |
| I believe that patient data gathered at the e-Exercise web-application is stored safely (*)                                                       | Kloek (2020) [62]   |
| Lack of physical/visual contact not a major issue for HCPs (facilitator)                                                                          |                     |
| Patients responded favorably to the exercises prescribed despite lack of hands-on assessment                                                      | Hinman (2017) [35]  |
| Hands-off approach was physically less demanding compared to usual care/contributed to sense of satisfaction                                      | Hinman (2017) [35]  |
| Functional improvements were observable using Skype                                                                                               | Hinman (2017) [35]  |
| Lack of physical and visual contact less of an issue than anticipated                                                                             | Lawford (2019) [38] |
| Able to work around the lack of visual contact (erring on the side of caution)                                                                    | Lawford (2019) [38] |
| I would get a good understanding of a patient's OA over the telephone (*)                                                                         | Lawford (2018) [58] |
| I would get a good understanding of a patient's OA over the internet video (*)                                                                    | Lawford (2018) [58] |
| I would be able to adequately monitor a patient's OA over the internet video (*)                                                                  | Lawford (2018) [58] |
| Positive attitude or needs of HCPs regarding feasibility of telehealth (facilitator)                                                              |                     |
| Ease of using Skype for consultations                                                                                                             | Hinman (2017) [35]  |
| Quality of technology suitable for providing instructions/prescribing exercises/receiving instantaneous feedback                                  | Hinman (2017) [35]  |
| More effective communication skills would be needed to consult via telephone                                                                      | Lawford (2019) [38] |
| It would be necessary to provide patients with pictures or videos of each exercise when consulting via telephone                                  | Lawford (2019) [38] |
| Experiences providing telephone-delivered care exceeded expectations, resulting in new enthusiasm                                                 | Lawford (2019) [38] |
| Written materials provided to patients helped to prescribe exercises effectively                                                                  | Lawford (2019) [38] |
| Training in communication and/or health coaching important to effectively deliver care over telephone                                             | Lawford (2019) [38] |
| Video consultations were easy and convenient                                                                                                      | Lawford (2021) [40] |
| Using the internet video to consult with an OA patient and prescribe an exercise program would be easy for me (*)                                 | Lawford (2018) [58] |
| I would be as satisfied talking to an OA patient over the internet video as I would be talking to the patient in person in my consulting room (*) | Lawford (2018) [58] |
| I would be interested in being involved in a service offering PT-prescribed exercise over the internet video for my people with OA (*)            | Lawford (2018) [58] |
| Using the internet video would be an acceptable way for me to deliver an exercise program to patients with OA (*)                                 | Lawford (2018) [58] |
| Using the internet video would be a useful (practical) way for me to deliver an exercise program to patients with OA (*)                          | Lawford (2018) [58] |
| Using the internet video would be an effective way for me to deliver an exercise program to patients with OA (*)                                  | Lawford (2018) [58] |
| Advantage of reducing number of treatments                                                                                                        | Kloek (2020) [62]   |
| Offering an innovative intervention attracted new patients                                                                                        | Kloek (2020) [62]   |
| That it results in less income is not/might not be a major disadvantage of e-Exercise (*)                                                         | Kloek (2020) [62]   |

|                                                                                                                                 |                     |
|---------------------------------------------------------------------------------------------------------------------------------|---------------------|
| Our physiotherapy practice has the intention to use e-Health innovations (*)                                                    | Kloek (2020) [62]   |
| <b>Patient-related benefits regarding feasibility of telehealth (facilitator)</b>                                               |                     |
| 24/7 availability of information and exercises                                                                                  | Bossen (2016) [28]  |
| Service could increase access to support for rural patients                                                                     | Egerton (2017) [32] |
| Skype-delivered care convenient for patients (time efficiency/flexibility/access)                                               | Hinman (2017) [35]  |
| Telephone-delivered care would be convenient for patients                                                                       | Lawford (2019) [38] |
| Telephone-delivered care could reduce patient costs associated with accessing physiotherapy services                            | Lawford (2019) [38] |
| Telephone-delivered care could allow wider variety of patients to access physiotherapy                                          | Lawford (2019) [38] |
| Noticeable shift in patients' expectations of physiotherapy care (more willing to self-manage their condition)                  | Lawford (2019) [38] |
| Telephone-delivered care was convenient for patients                                                                            | Lawford (2019) [38] |
| An exercise program prescribed by a PT over the telephone would save a patient money (*)                                        | Lawford (2018) [58] |
| An exercise program prescribed by a PT over the internet video would save a patient money (*)                                   | Lawford (2018) [58] |
| Receiving an exercise program from a PT over the telephone would be a convenient form of health care for an OA patient (*)      | Lawford (2018) [58] |
| Receiving an exercise program from a PT over the internet video would be a convenient form of health care for an OA patient (*) | Lawford (2018) [58] |
| Receiving an exercise program from a PT over the telephone would save the patient time (*)                                      | Lawford (2018) [58] |
| Receiving an exercise program from a PT over the internet video would save the patient time (*)                                 | Lawford (2018) [58] |
| Using the telephone would be an affordable way for patients to receive a PT-prescribed exercise program for their OA (*)        | Lawford (2018) [58] |
| Using the internet video would be an affordable way for patients to receive a PT-prescribed exercise program for their OA (*)   | Lawford (2018) [58] |
| <b>Positive aspects regarding communication and relationship using telehealth (facilitator)</b>                                 |                     |
| Developed a strong rapport with patients over the telephone                                                                     | Lawford (2019) [38] |
| Consulting via telephone forced to focus on effective conversations with patients (more personal level)                         | Lawford (2019) [38] |
| Pleasantly surprised by experience with video consultations (had some of the best conversations)                                | Lawford (2021) [40] |

## Domain 2: Individual HCP factors

### Expertise

| Description                                                                                     | Reference                |
|-------------------------------------------------------------------------------------------------|--------------------------|
| Lack of knowledge or skills around LIs or promoting behavioral change (barrier)                 |                          |
| Lack of knowledge around appropriate interventions for weight loss                              | Allison (2019) [27]      |
| Uncertainty about how to enact their understanding of relationship between weight and knee OA   | Allison (2019) [27]      |
| Limited knowledge of exercise prescription (uncertainty of what exercise to recommend/how much) | Christiansen (2020) [29] |
| Not received sufficient training on exercise/lack of education                                  | Christiansen (2020) [29] |
| Knowledge of exercise and weight-loss treatments is sometimes inaccurate or inadequate          | Egerton (2018) [33]      |
| Reduced confidence with providing suitable exercise and weight loss advice                      | Egerton (2018) [33]      |
| Lack of skills in promoting readiness and motivation for lifestyle treatments                   | Egerton (2018) [33]      |
| Variability in confidence to provide weight management (not confident)                          | MacKay (2018) [41]       |

|                                                                                                                                                  |                      |
|--------------------------------------------------------------------------------------------------------------------------------------------------|----------------------|
| Not confident in knowledge about weight management                                                                                               | MacKay (2020) [42]   |
| Concerns about capacity to learn/not having skills to fulfill study expectations/deal with challenging patients                                  | Nielsen (2014) [45]  |
| Not have sufficient skills to present PCST component (cognitive restructuring techniques) effectively                                            | Nielsen (2014) [45]  |
| Some process skills were dissimilar to pre-existing clinical communication skills and challenging to use                                         | Nielsen (2014) [45]  |
| Lack of knowledge about CBT (necessary to participate in training/RCT to fully appreciate value of CBT to practice)                              | Nielsen (2014) [45]  |
| Unclear on amount and type of activity necessary to obtain benefits without further damaging the knee                                            | Poitras (2010) [47]  |
| Uncertainties about dosage/frequency/type of physical activity                                                                                   | Selten (2017) [49]   |
| Unaware about practice guidelines in relation to aerobic exercise prescription/weight loss/pain management                                       | Tang (2020) [50]     |
| Knowledge about BMI/weight management was particularly poor (e.g. relying on visual estimations)                                                 | Tang (2020) [50]     |
| Limited knowledge of how to address weight management                                                                                            | Tang (2020) [50]     |
| Less awareness about aerobic exercise prescription                                                                                               | Tang (2020) [50]     |
| Reduced confidence with recommending individual weight/pain management plans (discuss in general terms)                                          | Tang (2020) [50]     |
| Lack of confidence/knowledge/skills in implementing evidence into practice (e.g. weight management)                                              | Teo (2020) [51]      |
| I don't have/might not have the required knowledge and training around obesity care (*)                                                          | Hill (2018) [56]     |
| I do not/might not have sufficient knowledge about knee OA exercise therapy and comorbidity to apply the protocol in daily clinical practice (*) | De Rooij (2020) [60] |
| Gaps in knowledge/skills (including how to facilitate behavior change, particularly with less motivated patients)                                | Holden (2009) [61]   |
| Lack of knowledge or skills around OA care in general (barrier)                                                                                  |                      |
| General lack of expertise/interest in OA (that could lead to inappropriate referral/suboptimal access to services)                               | Mann (2011) [43]     |
| Lack of physician education on OA care                                                                                                           | Miller (2020) [44]   |
| Only two GPs had clear understanding of clinical guidelines on OA                                                                                | Okwera (2019) [46]   |
| No knowledge about treatment                                                                                                                     | Rosemann (2006) [48] |
| Lack of knowledge or skills around specific resources (barrier)                                                                                  |                      |
| The issue is not a lack of suitable patient resources but awareness of them                                                                      | Egerton (2018) [33]  |
| Inability to discuss specific details of ACSM guideline                                                                                          | Tang (2020) [50]     |
| I do not/might not have sufficient skills to apply the protocol in daily clinical practice (*)                                                   | De Rooij (2020) [60] |
| I do not/might not read the protocol sufficiently to remember any of its contents (*)                                                            | De Rooij (2020) [60] |
| Having or improving knowledge or skills around LIs or promoting behavioral change (facilitator)                                                  |                      |
| Importance of having highly effective communication skills                                                                                       | Egerton (2018) [33]  |
| Value of monitoring/encouraging patients to develop own understanding of links between exercise/pain                                             | Hinman (2016) [34]   |
| Confident in capabilities/skills to use strategies they believed to be effective within scope of practice                                        | MacKay (2018) [41]   |
| Variability in confidence to provide weight management (confident)                                                                               | MacKay (2018) [41]   |
| Clinical experience helped to read the person's situation (identify approach to motivate them)                                                   | MacKay (2020) [42]   |
| Postgraduate continuing professional development courses to expand toolkit of therapeutic interventions                                          | MacKay (2020) [42]   |
| Confidence in addressing weight management                                                                                                       | MacKay (2020) [42]   |
| Opportunity to review PCST skills and learn more structured/deliberate ways of incorporating these into practice                                 | Nielsen (2014) [45]  |
| Increasing confidence in using PCST skills over the course of the study                                                                          | Nielsen (2014) [45]  |
| Improved interpersonal skills with general clinical patients as a result of participating in the study                                           | Nielsen (2014) [45]  |

|                                                                                                                           |                      |
|---------------------------------------------------------------------------------------------------------------------------|----------------------|
| Reasonable understanding of role physiotherapy plays in management of lower-limb OA                                       | Okwera (2019) [46]   |
| Knowledge/confidence in providing treatments related to strengthening and range of motion                                 | Tang (2020) [50]     |
| Confident in providing justifications for non-routinely adhering to guidelines (range of motion exercises)                | Tang (2020) [50]     |
| Being able to describe how they will manage pain during strengthening exercise                                            | Tang (2020) [50]     |
| Having or improving knowledge or skills around OA care in general (facilitator)                                           |                      |
| Need for tailored GP education to improve confidence                                                                      | Egerton (2018) [33]  |
| Importance of provider knowledge regarding OA management                                                                  | Miller (2020) [44]   |
| Physician education on OA management can affect both provider and patient attitudes                                       | Miller (2020) [44]   |
| Training sessions (as suggestion for physiotherapy service improvement)                                                   | Okwera (2019) [46]   |
| Knowledge about treatment                                                                                                 | Rosemann (2006) [48] |
| Available resources might improve knowledge and decision-making (facilitator)                                             |                      |
| Protocols offered guidance in setting up treatment/making clinical decisions/adapting treatment to comorbidity            | De Rooij (2014) [31] |
| List of restrictions was helpful in process of clinical decision making                                                   | De Rooij (2014) [31] |
| Being aware about ACSM guidelines                                                                                         | Tang (2020) [50]     |
| The protocol supports me in clinical reasoning (*)                                                                        | De Rooij (2020) [60] |
| The protocol is supporting the improvement of my knowledge regarding knee OA exercise therapy and comorbidity (*)         | De Rooij (2020) [60] |
| The protocol is supportive in which comorbidity-related symptoms I need to monitor before, during and after treatment (*) | De Rooij (2020) [60] |
| More insight into exercise tolerance/more background knowledge to make clinical decision by using strategy                | De Rooij (2020) [60] |
| Clinical experience (unclear factor)                                                                                      |                      |
| Driven by their professional experience of what does and doesn't work/trial and error                                     | MacKay (2020) [42]   |
| Treatments were based more on what works clinically (opposed to scientific evidence)                                      | MacKay (2020) [42]   |

### Attitude

| Description                                                                                          | Reference                |
|------------------------------------------------------------------------------------------------------|--------------------------|
| Negative attitude toward LIs (barrier)                                                               |                          |
| Assigning low priority to exercise as treatment                                                      | Christiansen (2020) [29] |
| GP does not prioritise exercise (*)                                                                  | Cottrell (2016) [53]     |
| It is not/might not be important that people with knee OA increase their overall activity levels (*) | Holden (2009) [61]       |
| Negative attitude toward guidelines or protocols (barrier)                                           |                          |
| Frustrations about lack of autonomy with decision-making                                             | Okwera (2019) [46]       |
| Negativity toward guidelines (clinical reasoning more important)                                     | Okwera (2019) [46]       |
| Positive attitude toward LIs (facilitator)                                                           |                          |
| Acknowledging that weight loss (when someone is overweight) is important                             | Egerton (2018) [33]      |
| Identifying weight management as important                                                           | MacKay (2018) [41]       |
| Perception that exercise and physical activity were central to management                            | MacKay (2020) [42]       |
| Acknowledging that weight management was a component of management                                   | MacKay (2020) [42]       |

|                                                                                                                                                                                     |                      |
|-------------------------------------------------------------------------------------------------------------------------------------------------------------------------------------|----------------------|
| Expecting to utilize/continue integrating PCST in general clinical work as physical therapist (beyond the study)                                                                    | Nielsen (2014) [45]  |
| There is place for each (self-management programs/physiotherapy/orthopedic consultants) in OA management                                                                            | Okwera (2019) [46]   |
| Many interventions should be used before resorting to medication (including physiotherapy)                                                                                          | Poitras (2010) [47]  |
| Other interventions (including physiotherapy) should be used before paracetamol                                                                                                     | Poitras (2010) [47]  |
| NSAIDs alone are not sufficient to appropriately treat inflammation and have to be combined with physiotherapy                                                                      | Poitras (2010) [47]  |
| Patients should be encouraged to resume/maintain daily activities                                                                                                                   | Poitras (2010) [47]  |
| Knowing the importance of weight management for knee OA                                                                                                                             | Tang (2020) [50]     |
| Aware that being overweight/obese is risk factor for knee OA/losing weight is important                                                                                             | Teo (2020) [51]      |
| Physiotherapy (referral) needs to be prioritised                                                                                                                                    | Cottrell (2016) [53] |
| It is important that people with CKP increase their overall activity levels (*)                                                                                                     | Cottrell (2016) [53] |
| Exercise for CKP should (perhaps) preferably be used before drug treatment has been tried (*)                                                                                       | Cottrell (2016) [53] |
| Weight loss should be the first-line treatment in the management of obese patients with symptomatic knee OA (*)                                                                     | Hill (2018) [55]     |
| Obese patients with symptomatic knee OA should be referred to a specialist weight management service before orthopaedic assessment (*)                                              | Hill (2018) [55]     |
| Weight loss should be the first-line treatment in the management of symptomatic knee OA in obesity (*)                                                                              | Hill (2018) [56]     |
| Support for creation of regional centres where orthopaedic surgeons and bariatric surgeons, with their respective teams, could assess obese patients with symptomatic knee pain (*) | Hill (2018) [56]     |
| Important to try non-surgical treatments first (*)                                                                                                                                  | Hofstede (2016) [57] |
| Important to delay a surgery as long as possible (*)                                                                                                                                | Hofstede (2016) [57] |
| Conservative treatment is (perhaps) an important part of OA management (*)                                                                                                          | Reid (2014) [59]     |
| Positive attitude toward guidelines or protocols (facilitator)                                                                                                                      |                      |
| Perceived professional responsibility to adhere to evidence-based guideline                                                                                                         | Allison (2019) [27]  |
| Important to follow guidelines (*)                                                                                                                                                  | Hofstede (2016) [57] |
| In general, I do not/might not feel resistance towards working according to protocols (*)                                                                                           | De Rooij (2020) [60] |
| Autonomy (unclear factor)                                                                                                                                                           |                      |
| Autonomy affects referral considerations                                                                                                                                            | Law (2019) [37]      |

### Role

| Description                                                                                                        | Reference                |
|--------------------------------------------------------------------------------------------------------------------|--------------------------|
| Perception of own role potentially impeding prescription or follow-up of LIs (barrier)                             |                          |
| Referring patients to other health care providers and for other treatments rather than recommending exercise       | Christiansen (2020) [29] |
| Referring patients to those with specialized knowledge rather than treating themselves (outside scope of practice) | Christiansen (2020) [29] |
| Paternalistic approach to care (low level of engagement in providing exercise and weight management advice)        | Egerton (2018) [33]      |
| Lack of confidence/uncertainty related to role in weight management                                                | MacKay (2020) [42]       |
| Perception that discussions related to diet were not part of their scope of practice                               | MacKay (2020) [42]       |
| Changing own practice style remained as barrier after OA training                                                  | Miller (2020) [44]       |
| Most GPs believed their contribution was essentially limited to diagnosis of condition and medication              | Poitras (2010) [47]      |

|                                                                                                                                          |                      |
|------------------------------------------------------------------------------------------------------------------------------------------|----------------------|
| Not focusing on increasing patients' motivation for behavioural change, but just giving general recommendations                          | Rosemann (2006) [48] |
| Mentioning benefits of weight reduction, but not actively coaching or referring patients                                                 | Selten (2017) [49]   |
| Not perceiving weight reduction advice as their responsibility                                                                           | Selten (2017) [49]   |
| Uncertainty over scope of practice/questioning whether weight and pain management fall outside scope                                     | Tang (2020) [50]     |
| Describing own role as prepping patients for knee surgery when they were referred for physiotherapy                                      | Teo (2020) [51]      |
| Advice about how to lose weight was limited to brief general advice                                                                      | Teo (2020) [51]      |
| Considering weight loss to be outside own scope of practice (role of a dietician)                                                        | Teo (2020) [51]      |
| Comfortable suggesting surgery to patients who responded poorly to conservative management                                               | Teo (2020) [51]      |
| GPs should (perhaps) not follow-up patients to monitor extent of continuation of exercises (*)                                           | Cottrell (2016) [53] |
| It is the patient's own responsibility to continue doing their exercise programme (*)                                                    | Cottrell (2016) [53] |
| Not (or perhaps not) interested in being the orthopedic surgeon in an ortho-bariatric centre (*)                                         | Hill (2018) [55]     |
| Therapist's role seen as assessment/exercise prescription/education (relatively short-term responsibilities)                             | Holden (2009) [61]   |
| Patient's role to follow prescribed exercise program over long term/get on board with treatment                                          | Holden (2009) [61]   |
| Physical therapists should (perhaps) not prescribe general exercise for every patient with knee OA (*)                                   | Holden (2009) [61]   |
| It is the patient's own responsibility to continue doing their exercise program (*)                                                      | Holden (2009) [61]   |
| It is not/might not be the physiotherapist's responsibility to make sure that the patient will continue doing their exercise program (*) | Holden (2009) [61]   |
| Negative consequences for own role when referring patients to LIs (barrier)                                                              |                      |
| Job satisfaction may be diminished when handing over care of their patients to third party with no involvement                           | Egerton (2017) [32]  |
| The addition of a care support team may lead them feeling disconnected with their patient's care                                         | Egerton (2017) [32]  |
| Perception of own role potentially stimulating prescription or follow-up of LIs (facilitator)                                            |                      |
| Patient-centred approach (high level of engagement in providing exercise and weight management advice)                                   | Egerton (2018) [33]  |
| Viewing themselves as having an important role in supporting clients to participate in management                                        | MacKay (2018) [41]   |
| Routinely including education about weight management                                                                                    | MacKay (2020) [42]   |
| Playing a role in promoting engagement in management                                                                                     | MacKay (2020) [42]   |
| Necessity of physiotherapy to effectively rehabilitate knee OA patients (because of knowledge/availability)                              | Poitras (2010) [47]  |
| Importance of PT's role in educating patients with regards to NSAIDs/alternatives (including physiotherapy)                              | Poitras (2010) [47]  |
| Necessity of PT involvement in managing activity (because potentially detrimental if excessive)                                          | Poitras (2010) [47]  |
| Exercise planning is usually PT's role (rather than GP's)                                                                                | Poitras (2010) [47]  |
| Necessity of PT follow-up sessions to assess and encourage patient adherence                                                             | Poitras (2010) [47]  |
| PT's role to individualize patients' activity according to needs and capacity                                                            | Poitras (2010) [47]  |
| Although agreeing with active patient participation, it is ultimately PT's role to appropriately manage patients                         | Poitras (2010) [47]  |
| Desire to be more involved in life style counselling (upgrade of profession)                                                             | Rosemann (2006) [48] |
| Perceiving exercise prescription to be their main role                                                                                   | Teo (2020) [51]      |
| Advising patients against surgery for as long as possible (last option)                                                                  | Teo (2020) [51]      |
| Implementing several strategies to boost adherence                                                                                       | Teo (2020) [51]      |
| Not their role to advise the patient about knee surgery, opting not to discuss surgery at all                                            | Teo (2020) [51]      |
| Advising patients against knee arthroscopy if specifically asked about this procedure                                                    | Teo (2020) [51]      |

|                                                                                                                                   |                      |
|-----------------------------------------------------------------------------------------------------------------------------------|----------------------|
| It is part of my job to reassure patients about the safety of exercise for CKP (*)                                                | Cottrell (2016) [53] |
| GPs should educate patients with CKP about how to change their lifestyle for the better (*)                                       | Cottrell (2016) [53] |
| GPs should prescribe quadriceps strengthening exercises to every patient with CKP (*)                                             | Cottrell (2016) [53] |
| GPs should prescribe general exercise (e.g. walking or swimming) for every patient with CKP (*)                                   | Cottrell (2016) [53] |
| There was a BMI threshold above which they would not perform a TKA at all (*)                                                     | Hill (2018) [55]     |
| There was a BMI threshold above which they would not perform a TKA until the patient had attended a weight management program (*) | Hill (2018) [55]     |
| Intention to refer patients to an ortho-bariatric centre if it existed (*)                                                        | Hill (2018) [56]     |
| Recognizing potential influence on exercise adherence, sharing responsibility of exercise adherence with patient                  | Holden (2009) [61]   |
| Physical therapists should prescribe local strengthening exercise for every patient with knee OA (*)                              | Holden (2009) [61]   |
| Physiotherapists should educate chronic patients with knee OA about how to change their lifestyle for the better (*)              | Holden (2009) [61]   |
| Positive consequences for own role when referring patients to LIs (facilitator)                                                   |                      |
| Some appeal for a lessening of their own responsibility in terms of managing this condition                                       | Egerton (2017) [32]  |

### Domain 3: Patient factors

#### Health status

| Description                                                                                                      | Reference           |
|------------------------------------------------------------------------------------------------------------------|---------------------|
| Severity of disease and symptoms (barrier)                                                                       |                     |
| Level of disease severity (i.e. whether people with very mild or very severe joint disease would benefit)        | Egerton (2017) [32] |
| Patients delay care until they are highly symptomatic (missing opportunities to slow disease progression)        | Miller (2020) [44]  |
| Rehabilitation potential depended on length of disability (less potential with late management)                  | Poitras (2010) [47] |
| Paracetamol could mask pain/underlying physical problem (reducing opportunity to assess/manage problem)          | Poitras (2010) [47] |
| Difficult to obtain effective analgesia with some patients                                                       | Poitras (2010) [47] |
| Potential to create unrealistic expectations and discouragement in patients that were too disabled               | Poitras (2010) [47] |
| Questioning capacity to perform regular exercise because of severity of disability                               | Poitras (2010) [47] |
| Knee pain restricts activities in general (which makes weight loss difficult)                                    | Poitras (2010) [47] |
| Pain (main barrier resulting in reduced dosage prescription of strengthening exercises)                          | Tang (2020) [50]    |
| Patient's ability to exercise (main barrier resulting in reduced dosage prescription of strengthening exercises) | Tang (2020) [50]    |
| Pain (key barrier to prescription of exercise as recommended by CPGs)                                            | Tang (2020) [50]    |
| Pain (barrier to prescription of aerobic exercise)                                                               | Tang (2020) [50]    |
| Osteoarthritis severity (mild/severe) (patient-related barrier)                                                  | Wallis (2020) [52]  |
| Effectiveness related to severity of joint damage/pain level (less effective when more damage/pain)              | Holden (2009) [61]  |
| Reluctant to promote exercise in the presence of pain                                                            | Holden (2009) [61]  |
| Pain (as patient-centered barrier to adherence)                                                                  | Holden (2009) [61]  |
| Exercises are not/might not be effective for patients if an X-ray shows severe knee osteoarthritis (*)           | Holden (2009) [61]  |
| Negative impact of comorbidities (barrier)                                                                       |                     |



|                                                                                                                                      |                          |
|--------------------------------------------------------------------------------------------------------------------------------------|--------------------------|
| Difficulty with managing multiple conditions/tendency to prioritize other conditions over OA                                         | Christiansen (2020) [29] |
| Significant impact of other health problems on patients' ability to commit fully to exercise program                                 | Lawford (2020) [39]      |
| Patient body weight (overweight/obese) (impedes exercise/makes visits to services more difficult)                                    | Miller (2020) [44]       |
| Questioning capacity to perform regular exercise because of general health                                                           | Poitras (2010) [47]      |
| Depression as important barrier to motivate patients to physical exercise                                                            | Rosemann (2006) [48]     |
| Comorbidities (often more severe pain, hampering ability to exercise or be physically active)                                        | Teo (2020) [51]          |
| Existing comorbidities (patient-related barrier)                                                                                     | Wallis (2020) [52]       |
| <b>Other patient characteristics (barrier)</b>                                                                                       |                          |
| Person had been sedentary throughout life                                                                                            | Poitras (2010) [47]      |
| Questioning capacity to perform regular exercise because of age                                                                      | Poitras (2010) [47]      |
| Patients with knee OA tended to be older/less active/with slower metabolism (which makes weight loss difficult)                      | Poitras (2010) [47]      |
| Older age (patient-related barrier)                                                                                                  | Wallis (2020) [52]       |
| Poor rate of previous (physiotherapy) success (*)                                                                                    | Reid (2014) [59]         |
| <b>Severity of disease and symptoms (facilitator)</b>                                                                                |                          |
| Most patients tolerated a lot more than was expected (amount of exercise)                                                            | Lawford (2020) [39]      |
| Rehabilitation potential depended on length of disability (better outcomes with early management)                                    | Poitras (2010) [47]      |
| Effective analgesia necessary for patients to be able to accomplish activities                                                       | Poitras (2010) [47]      |
| Exercise is effective for patients if an X-ray shows severe knee OA (*)                                                              | Cottrell (2016) [53]     |
| Referring patients to physiotherapy if they had high levels of pain/disability and where radiographic evidence of OA was present (*) | Reid (2014) [59]         |
| Effectiveness related to severity of joint damage/pain level (more effective when less damage/pain)                                  | Holden (2009) [61]       |
| Exercises are effective for patients if an X-ray shows moderate knee osteoarthritis (*)                                              | Holden (2009) [61]       |
| Exercises are effective for patients if an X-ray shows mild knee osteoarthritis (*)                                                  | Holden (2009) [61]       |
| <b>Other patient characteristics (facilitator)</b>                                                                                   |                          |
| Clients' pre-existing activity level (e.g. active person)                                                                            | MacKay (2018) [41]       |
| Importance of evaluating a patient's overall functional ability (rather than only knee signs/symptoms)                               | Teo (2020) [51]          |
| Referring patients to physiotherapy if they were of a younger age (*)                                                                | Reid (2014) [59]         |
| <b>Severity of disease and symptoms (unclear factor)</b>                                                                             |                          |
| Treatment decisions depended on people's symptoms/findings of physical assessment                                                    | MacKay (2020) [42]       |
| Management strategies depended on how bad the knee is                                                                                | Okwera (2019) [46]       |
| Exercise does not/might not work just as well for everybody, regardless of the amount of pain they have (*)                          | Cottrell (2016) [53]     |
| Exercise does not/might not work just as well for everybody, regardless of the amount of pain they have (*)                          | Holden (2009) [61]       |
| <b>Other patient characteristics (unclear factor)</b>                                                                                |                          |
| Clients' general health                                                                                                              | MacKay (2018) [41]       |

### *Treatment expectations and preferences*

| Description | Reference |
|-------------|-----------|
|-------------|-----------|

|                                                                                                                       |                          |
|-----------------------------------------------------------------------------------------------------------------------|--------------------------|
| Negative attitude toward LIs (barrier)                                                                                |                          |
| Patients' lack of motivation to exercise/patients want passive treatment approach or quick fix                        | Christiansen (2020) [29] |
| Patients often have own ideas on management (problematic if primarily passive treatments)                             | Egerton (2018) [33]      |
| Reluctance from patients to talk about physical activity (physical therapist's role, not the coach's role)            | Hinman (2016) [34]       |
| Interdisciplinary consult with dietician could not always take place because patients refused to visit dietician      | Knoop (2020) [36]        |
| People that don't particularly like exercise                                                                          | Lawford (2020) [39]      |
| Disconnect between PTs' recommendations for treatment and clients' expectations or preferences                        | MacKay (2018) [41]       |
| Prior experiences with physical therapy influenced client expectations of clinical encounter                          | MacKay (2018) [41]       |
| People's preferences were at odds with physical therapists' beliefs about management                                  | MacKay (2020) [42]       |
| Doubts about patients' willingness to make behavioral changes                                                         | Mann (2011) [43]         |
| Patients don't want to expend effort towards lifestyle change                                                         | Miller (2020) [44]       |
| Public expectation of what physical therapy treatment should be (e.g. didn't come to have thinking challenged)        | Nielsen (2014) [45]      |
| Feeling that patients tended to prefer treatment administered to them                                                 | Okwera (2019) [46]       |
| Negative comments about patient reports of a lack of "hands-on" physiotherapy                                         | Okwera (2019) [46]       |
| Benefits obtained in the long term, which often conflicted with patient expectations for short-term benefits          | Poitras (2010) [47]      |
| Lack of patient motivation in remaining active despite knee OA                                                        | Poitras (2010) [47]      |
| Patient views and expectations rarely matched patient needs                                                           | Poitras (2010) [47]      |
| Questioning capacity to perform regular exercise because of motivation                                                | Poitras (2010) [47]      |
| Success rate in motivating patients too low (distinctly resigned regarding their impact on patients' life style)      | Rosemann (2006) [48]     |
| Frustration about impact of information (e.g. self-help groups) (lot of patients find excuses not to participate)     | Rosemann (2006) [48]     |
| Self-motivation (intrinsic barrier for patient adherence)                                                             | Teo (2020) [51]          |
| Patient expectations (not keen to participate in exercise/play active role in management, desire for quick fix)       | Teo (2020) [51]          |
| Lack of motivation to participate active lifestyle interventions (patient-related barrier)                            | Wallis (2020) [52]       |
| Existing relationships with physiotherapists (as barrier to referral if patient already had treating physiotherapist) | Wallis (2020) [52]       |
| Exercise does not match patient needs/expectations (*)                                                                | Cottrell (2016) [53]     |
| The patients are not/might not be cooperative in applying the protocol in daily clinical practice (*)                 | De Rooij (2020) [60]     |
| Patients with knee OA and comorbidity are not always motivated to perform exercises                                   | De Rooij (2020) [60]     |
| Lack of motivation or laziness (as patient-centered barrier to adherence)                                             | Holden (2009) [61]       |
| Negative treatment expectations (as patient-centered barrier to adherence)                                            | Holden (2009) [61]       |
| Positive attitude toward TJA (barrier)                                                                                |                          |
| Patients' ideas about whether they wanted surgery influenced making referrals to the LMP                              | Law (2019) [37]          |
| Unrealistic expectations of the outcome of joint replacement among patients                                           | Mann (2011) [43]         |
| Feeling pressure by patients to refer them to specialist                                                              | Rosemann (2006) [48]     |
| Make use of patients' preference for TJA within LIs (facilitator)                                                     |                          |
| Suggestion to relist patients completing the programme further up the waiting list (for surgery)                      | Law (2019) [37]          |
| Using bargaining techniques centering on implications of LMP for replacement surgery (put patient on the list)        | Law (2019) [37]          |
| Patients' preferences (unclear factor)                                                                                |                          |

|                                                         |                    |
|---------------------------------------------------------|--------------------|
| Management strategies depended on what the person wants | Okwera (2019) [46] |
|---------------------------------------------------------|--------------------|

### Active participation

| Description                                                                                                   | Reference            |
|---------------------------------------------------------------------------------------------------------------|----------------------|
| <b>Low patient adherence or engagement (barrier)</b>                                                          |                      |
| Shifting patients' mind-sets to active participation/making lifestyle changes was challenging/time consuming  | Egerton (2018) [33]  |
| How well they felt the individual patient would engage with programme influenced making referrals to the LMP  | Law (2019) [37]      |
| Challenging work to get clients to initiate management and maintain it over the long term                     | MacKay (2018) [41]   |
| Getting buy-in (engaging people in management) often portrayed as challenge                                   | MacKay (2020) [42]   |
| Lack of compliance with home exercise regimes and advice given to patients was common                         | Okwera (2019) [46]   |
| Patients' adherence to management recommendations was limited (because of fatalism)                           | Poitras (2010) [47]  |
| Patients' unsatisfactory adherence to exercise programs                                                       | Teo (2020) [51]      |
| Main concern was participant adherence to physical activity routines after end of program                     | Duarte (2019) [54]   |
| Negative perceptions of patients' levels of exercise adherence                                                | Holden (2009) [61]   |
| <b>High patient adherence or engagement (facilitator)</b>                                                     |                      |
| Positive impact of information, education, and structured monitoring on patients' adherence to exercise       | Hinman (2016) [34]   |
| Patients adherent/easy to work with when they engaged in exercise program/started seeing improvements         | Lawford (2020) [39]  |
| Cohort of patients, in general, was highly motivated (remained interested/motivated for entirety of 6 months) | Lawford (2021) [40]  |
| Enthusiastic participation of the participants                                                                | Duarte (2019) [54]   |
| <b>Importance of high patient adherence or engagement for effectiveness of LIs (facilitator)</b>              |                      |
| Exercise progression was most effective when the participant requested progression                            | Davis (2018) [30]    |
| Client participation in management was critical to see improvement in symptoms                                | MacKay (2018) [41]   |
| Getting buy-in (engaging people in management) critical to improving outcomes                                 | MacKay (2020) [42]   |
| Necessity of patients' active participation in knee OA management (to achieve significant outcomes)           | Poitras (2010) [47]  |
| How well a patient complies with their exercise programme determines how effective it will be (*)             | Cottrell (2016) [53] |
| Importance of exercise adherence/link between level of adherence and clinical outcomes (dose-response effect) | Holden (2009) [61]   |
| How well a patient complies with their exercise program determines how effective it will be (*)               | Holden (2009) [61]   |

### Capabilities

| Description                                                                                                           | Reference           |
|-----------------------------------------------------------------------------------------------------------------------|---------------------|
| <b>Low health literacy (barrier)</b>                                                                                  |                     |
| Poor health literacy in chronic disease management negatively influenced discussing exercise/weight management        | Egerton (2018) [33] |
| Diagnosis can foster fear-avoidance (e.g. reduced activity) due to belief activity/exercise will cause further damage | Egerton (2018) [33] |
| Pessimistic about patients' abilities to make lifestyle changes to address their knee OA (not capable)                | Egerton (2018) [33] |
| Lack of information and patient-professional discussion at point of referral may hinder uptake/retention of LMP       | Law (2019) [37]     |

|                                                                                                          |                      |
|----------------------------------------------------------------------------------------------------------|----------------------|
| Patients were sceptical about safety and benefits of strengthening exercise for OA                       | Lawford (2020) [39]  |
| Fear (patients required a lot of encouragement and reassurance)                                          | Lawford (2020) [39]  |
| Patients were apprehensive about managing weight by themselves                                           | Lawford (2021) [40]  |
| Some clients had misconceptions about OA (nothing they could do/normalising it as part of ageing)        | MacKay (2018) [41]   |
| Some clients feared participation in exercise (concerns for further degeneration)                        | MacKay (2018) [41]   |
| Accepting diagnosis of OA could be particularly challenging for people with early OA                     | MacKay (2018) [41]   |
| Clients' language (e.g. haven't mastered English/French)                                                 | MacKay (2018) [41]   |
| Clients' lifestyle (e.g. coping, attitude towards pain)                                                  | MacKay (2018) [41]   |
| Insufficient information for OA patients (e.g. not providing leaflets)                                   | Mann (2011) [43]     |
| Difficulty convincing patients to consider non-surgical, non-medication treatments                       | Miller (2020) [44]   |
| Lack of patient self-efficacy (regarding lifestyle changes)                                              | Miller (2020) [44]   |
| Lack of knowledge about OA (patient barrier)                                                             | Miller (2020) [44]   |
| Most patients demonstrated fatalism/inadequate knowledge and beliefs related to knee OA management       | Poitras (2010) [47]  |
| Ambivalent about patients' ability to lose weight (not able to succeed in making lifestyle changes)      | Selten (2017) [49]   |
| The belief that patients are not capable of losing weight                                                | Selten (2017) [49]   |
| Fear of falling (intrinsic barrier for patient adherence)                                                | Teo (2020) [51]      |
| Fear of pain (intrinsic barrier for patient adherence)                                                   | Teo (2020) [51]      |
| Language/different cultural backgrounds (patient-related barrier)                                        | Wallis (2020) [52]   |
| Patients do not always believe in/may lack knowledge about effectiveness of exercise therapy             | De Rooij (2020) [60] |
| Fear of harm (as patient-centered barrier to adherence)                                                  | Holden (2009) [61]   |
| Limited financial resources (barrier)                                                                    |                      |
| Clients' socioeconomic status (e.g. great poverty, shelter system)                                       | MacKay (2018) [41]   |
| Costs related to weight loss can be prohibitive for patients with limited resources (financial burdens)  | Miller (2020) [44]   |
| Other responsibilities (barrier)                                                                         |                      |
| Clients' family responsibilities (e.g. busy, lot going on)                                               | MacKay (2018) [41]   |
| Work/other commitments precluding exercise-therapy (patient-related barrier)                             | Wallis (2020) [52]   |
| High health literacy or importance of education (facilitator)                                            |                      |
| Importance of pain education and reassurance about safety and benefits of exercise                       | Lawford (2020) [39]  |
| Education contributed to buy-in to treatment (pathology, consequences, treatments)                       | MacKay (2020) [42]   |
| Need for early education about OA/self-management and treatment options and opportunity to discuss these | Mann (2011) [43]     |
| Ambivalent about patients' ability to lose weight (able)                                                 | Selten (2017) [49]   |
| Education focused on self-management strategies                                                          | Teo (2020) [51]      |
| Inform patients with knee OA and comorbidity better about benefits of exercise therapy                   | De Rooij (2020) [60] |
| Social support (facilitator)                                                                             |                      |
| Level of support patients had from family/people close to them seemed to make a big difference           | Lawford (2021) [40]  |
| Integrating patients' social system into treatment                                                       | Rosemann (2006) [48] |
| Health literacy (unclear factor)                                                                         |                      |

|                                                                 |                    |
|-----------------------------------------------------------------|--------------------|
| Management strategies depended on what the person can cope with | Okwera (2019) [46] |
| Other responsibilities (unclear factor)                         |                    |
| Clients' occupation                                             | MacKay (2018) [41] |

#### Domain 4: Professional interactions

##### Collaboration

| Description                                                                                                           | Reference            |
|-----------------------------------------------------------------------------------------------------------------------|----------------------|
| Non-optimal interdisciplinary collaboration or healthcare provision (barrier)                                         |                      |
| Cautious not to encroach on other HCPs' territory                                                                     | Allison (2019) [27]  |
| Potential for confusion about the treatment plan                                                                      | Egerton (2017) [32]  |
| Potential for issues resulting from incongruence of patient advice and information                                    | Egerton (2017) [32]  |
| Second professional not necessary to fulfill health coach role (part of own professional role as physical therapists) | Hinman (2016) [34]   |
| Overlapping roles of physical therapist and coach could be source of conflict if not working from same set of goals   | Hinman (2016) [34]   |
| Necessary teamwork less likely if coach/physical therapist did not recognize/support each other's goals               | Hinman (2016) [34]   |
| Physicians who did not make timely referrals to physical therapy                                                      | MacKay (2018) [41]   |
| Physicians' attitudes could influence clients' perceptions and level of buy-in to physical therapy                    | MacKay (2018) [41]   |
| Lack of provision for patients who were not candidates for surgery (too long without help)                            | Mann (2011) [43]     |
| Patients lacked proactive follow-up to support self-management                                                        | Mann (2011) [43]     |
| Lack of coordination between leisure, social and health services                                                      | Mann (2011) [43]     |
| Insufficient (physiotherapy) intervention when patients were seen                                                     | Mann (2011) [43]     |
| Belief that physiotherapists did not find it rewarding/interesting to treat OA patients                               | Mann (2011) [43]     |
| Criticizing the decision to centralize musculoskeletal physiotherapy service (useful to have somebody in team)        | Okwera (2019) [46]   |
| Frustrations about lack of continuity regarding team of physiotherapists within clinic                                | Okwera (2019) [46]   |
| Not working closely with physiotherapists/frustrations about working relationship                                     | Okwera (2019) [46]   |
| Dissatisfaction about loss of coherent working since centralizing musculoskeletal physiotherapy service               | Okwera (2019) [46]   |
| Disagreement on effective exercise parameters                                                                         | Poitras (2010) [47]  |
| Disagreement on optimal design of exercise programs to increase adherence                                             | Poitras (2010) [47]  |
| Mistrust in interventions dieticians use to help patients' with weight reduction attempts                             | Selten (2017) [49]   |
| Negative views about physical therapists who provided non-evidence-based treatments                                   | Selten (2017) [49]   |
| Mistrust because they observed huge differences in quality of care delivered by physical therapists                   | Selten (2017) [49]   |
| Occupational therapists, podiatrists and physical therapists do not work together optimally in OA care                | Selten (2017) [49]   |
| Role of rheumatologist in knee/hip OA care perceived as unclear/limited                                               | Selten (2017) [49]   |
| Agreement that orthopedic surgeon's primary task is to assess whether patient is eligible for surgery                 | Selten (2017) [49]   |
| Orthopedic surgeons were perceived negatively by several healthcare providers                                         | Selten (2017) [49]   |
| Unclear what physio offers (*)                                                                                        | Cottrell (2016) [53] |

|                                                                                                                                                           |                      |
|-----------------------------------------------------------------------------------------------------------------------------------------------------------|----------------------|
| My colleagues in physiotherapy are not/might not be cooperative in applying the protocol in daily clinical practice (*)                                   | De Rooij (2020) [60] |
| The general practitioners or other physicians are not/might not be collaborative regarding the application of the protocol in daily clinical practice (*) | De Rooij (2020) [60] |
| Suboptimal collaboration with general practitioners and physicians                                                                                        | De Rooij (2020) [60] |
| Referring physicians do not always believe in/may lack knowledge about effectiveness of exercise therapy                                                  | De Rooij (2020) [60] |
| No access to other HCPs (barrier)                                                                                                                         |                      |
| Lack of access to other healthcare providers (e.g. physicians with expertise in OA)                                                                       | MacKay (2018) [41]   |
| Good interdisciplinary collaboration or healthcare provision, or suggestions for improvement (facilitator)                                                |                      |
| Perceived status of physical therapists within health care team and wider community                                                                       | Allison (2019) [27]  |
| Importance of clearly understanding roles and functions of service, care support team, and themselves                                                     | Egerton (2017) [32]  |
| Importance of having confidence in (the skills of) the staff of a new service to deliver on promises                                                      | Egerton (2017) [32]  |
| Having a personal relationship with the people providing the service/a desire to work closely with service staff                                          | Egerton (2017) [32]  |
| Appreciation how their participation afforded physical therapists and coaches opportunities to collaborate                                                | Hinman (2016) [34]   |
| Importance of teamwork in delivering the integrated intervention                                                                                          | Hinman (2016) [34]   |
| Reinforcement of health messages from another clinician could be valuable                                                                                 | Hinman (2016) [34]   |
| Having a separate coach freed therapists up to focus on other treatment aspects                                                                           | Hinman (2016) [34]   |
| Multidisciplinary nature of LMP (ability to utilize expertise from other professionals)                                                                   | Law (2019) [37]      |
| Importance of good working relationships                                                                                                                  | MacKay (2018) [41]   |
| Physicians who expressed support for physical therapy/exercise and referred clients to physical therapy early                                             | MacKay (2018) [41]   |
| Patients would be better served by long-term condition model of care (e.g. diabetes mellitus)                                                             | Mann (2011) [43]     |
| Patients should initiate own follow-up when needed (as better use of time/health care resources)                                                          | Mann (2011) [43]     |
| Allow patients, after initial referral, to use direct access system to service (no need for re-referral)                                                  | Mann (2011) [43]     |
| Utilising clinic health educator who met with patients for weight loss discussions and followed up by phone                                               | Miller (2020) [44]   |
| Employing a multi-pronged approach to engage patients in weight loss                                                                                      | Miller (2020) [44]   |
| Overall positive experience of physiotherapy service and therapists                                                                                       | Okwera (2019) [46]   |
| GPs believed PT involvement was necessary to motivate the patient and manage the exercise program                                                         | Poitras (2010) [47]  |
| Gate keeper role for GPs could reduce patients' pressure to refer to orthopaedics/decrease performed x-rays                                               | Rosemann (2006) [48] |
| Involvement of practice nurses is imaginable in the area of life style counselling and advice giving                                                      | Rosemann (2006) [48] |
| Dieticians are helpful for patients trying to lose weight                                                                                                 | Selten (2017) [49]   |
| Need for physical therapists to provide evidence-based exercises instead of non-evidence-based modalities                                                 | Selten (2017) [49]   |
| Non-pharmacological, non-surgical OA care can and should be provided in a primary care setting                                                            | Selten (2017) [49]   |
| GPs have coordinating role (diagnose/monitor, refer when necessary, lifestyle education, long-term coach)                                                 | Selten (2017) [49]   |
| Physical therapists can guide patients/provide lifestyle advice (more time compared with GPs)                                                             | Selten (2017) [49]   |
| Perceiving rheumatologists' role as valuable (giving injections, providing lifestyle/medication advice, refer)                                            | Selten (2017) [49]   |
| Knowledge that program was delivered by well-trained and trusted physiotherapist                                                                          | Wallis (2020) [52]   |
| Exercise for CKP is more effectively provided by physiotherapists than GPs (*)                                                                            | Cottrell (2016) [53] |
| Obese patients with symptomatic knee OA should be assessed by a specialist multidisciplinary service, which should include an orthopaedic surgeon (*)     | Hill (2018) [55]     |

|                                                                                                                                                                                    |                      |
|------------------------------------------------------------------------------------------------------------------------------------------------------------------------------------|----------------------|
| Support for creation of regional centres where orthopedic surgeons and bariatric surgeons, with their respective teams, could assess obese patients with symptomatic knee pain (*) | Hill (2018) [55]     |
| Obese patients with symptomatic knee OA should be referred to a specialist weight management service before orthopaedic assessment (*)                                             | Hill (2018) [56]     |
| Obese patients with symptomatic knee OA should be assessed by a specialist multidisciplinary service (*)                                                                           | Hill (2018) [56]     |
| Agreements with colleagues about the content of the care trajectory (*)                                                                                                            | Hofstede (2016) [57] |
| Positive attitudes of colleagues about non-surgical treatments (*)                                                                                                                 | Hofstede (2016) [57] |
| Agreements/ deliberations with primary care (GP, physical therapist, dietician) (*)                                                                                                | Hofstede (2016) [57] |
| Physiotherapists do not/might not lack expertise in OA management (*)                                                                                                              | Reid (2014) [59]     |
| Working with the protocol invites me to discuss more with experts in the field of the comorbidity (*)                                                                              | De Rooij (2020) [60] |
| Inform referrers better about benefits of exercise therapy in patients with knee OA and comorbidity                                                                                | De Rooij (2020) [60] |
| Optimize collaboration with orthopaedic surgeons and other health care providers                                                                                                   | De Rooij (2020) [60] |
| Support from colleagues                                                                                                                                                            | Kloek (2020) [62]    |
| <b>Access to other HCPs (facilitator)</b>                                                                                                                                          |                      |
| Potential benefit of increased access to OA specialists                                                                                                                            | Egerton (2017) [32]  |
| Access to a team on-site/a network of healthcare providers they trusted                                                                                                            | MacKay (2018) [41]   |
| Those with access to other clinicians recommended to consult another clinician for advice on diet as needed                                                                        | MacKay (2020) [42]   |
| Care could be improved if every GP practice contained an individual who took a particular interest in OA                                                                           | Mann (2011) [43]     |
| There should be OA specialist clinicians (all relevant allied health professions) providing services in community                                                                  | Mann (2011) [43]     |
| In-house physiotherapy (as suggestion for physiotherapy service improvement)                                                                                                       | Okwera (2019) [46]   |

### Communication and referral

| Description                                                                                                        | Reference            |
|--------------------------------------------------------------------------------------------------------------------|----------------------|
| <b>Lack of communication between HCPs (barrier)</b>                                                                |                      |
| Frustrations about lack of contact/communication involved in the referral and discharge process                    | Okwera (2019) [46]   |
| Dissatisfaction about loss of communication since centralizing musculoskeletal physiotherapy service               | Okwera (2019) [46]   |
| Specialist did not take time to explain what they had examined/x-rays he had taken                                 | Rosemann (2006) [48] |
| Physicians are not always collaborating in discussing medical conditions of patients                               | De Rooij (2020) [60] |
| <b>Challenges of communication and referral procedures (barrier)</b>                                               |                      |
| Necessary teamwork less likely if communication processes not clearly prescribed/structure not used                | Hinman (2016) [34]   |
| Different views were expressed about the preferred medium of communication                                         | Hinman (2016) [34]   |
| Interdisciplinary consult with dietician could not always take place because of problems with contacting dietician | Knoop (2020) [36]    |
| Challenges when coordinating multimodal care (including difficulties with the referral system)                     | Miller (2020) [44]   |
| Frustrations about restrictive referral pathways                                                                   | Okwera (2019) [46]   |
| Referral process was convoluted and at times irrelevant                                                            | Okwera (2019) [46]   |
| Requesting medical information about patients from specialists takes a lot of time                                 | De Rooij (2020) [60] |
| <b>Improving communication between HCPs (facilitator)</b>                                                          |                      |

|                                                                                                               |                      |
|---------------------------------------------------------------------------------------------------------------|----------------------|
| GPs wanted to be updated on the advice given and plan made so they know what has been said to their patient   | Egerton (2017) [32]  |
| Communication needed to be collaborative, patient-centered and consistent for integrated care to be effective | Hinman (2016) [34]   |
| Need for improving communication (quality of referrals, information at discharge)                             | Okwera (2019) [46]   |
| Better communication with specialists could increase efficacy of treatment                                    | Rosemann (2006) [48] |
| Receiving communication back from program physiotherapist about patient outcomes                              | Wallis (2020) [52]   |
| Clarity on what the patient has done at the physical therapist (*)                                            | Hofstede (2016) [57] |
| <b>Needs regarding communication and referral procedures (facilitator)</b>                                    |                      |
| Need to ensure referral procedures are streamlined in order to minimize impact on their busy schedules        | Egerton (2017) [32]  |
| Need for effective, useful and timely channels of communication between the GP and the care support team      | Egerton (2017) [32]  |
| Importance of effective mechanisms to communicate                                                             | MacKay (2018) [41]   |
| Streamlining the physiotherapy referral process (as suggestion for physiotherapy service improvement)         | Okwera (2019) [46]   |
| Straightforward, easy and quick lines of communication among different disciplines in healthcare center       | Selten (2017) [49]   |
| Simple, streamlined referral process (suggestion for promotion and referrals)                                 | Wallis (2020) [52]   |

### Domain 5: Incentives and resources

#### *Time*

| <b>Description</b>                                                                                       | <b>Reference</b>     |
|----------------------------------------------------------------------------------------------------------|----------------------|
| <b>Lack of time within patient consultations (barrier)</b>                                               |                      |
| Time pressure (unable to individualise weight management/develop exercise plans within appointment time) | Egerton (2018) [33]  |
| Restricted in amount of time they could allot per patient                                                | MacKay (2018) [41]   |
| Lack of time to give patients sufficient opportunity to discuss their condition                          | Mann (2011) [43]     |
| Lifestyle counseling is huge time commitment                                                             | Miller (2020) [44]   |
| Appointment times too short to address all of patient's issues and provide lifestyle counseling          | Miller (2020) [44]   |
| Time required to teach PCST skills to patients                                                           | Nielsen (2014) [45]  |
| Weight reduction advice takes too much time in a consultation                                            | Selten (2017) [49]   |
| Insufficient time in consultations (*)                                                                   | Cottrell (2016) [53] |
| Time constraints prevent GPs from providing advice on individual exercises for CKP (*)                   | Cottrell (2016) [53] |
| Limited time to review individual patients reduced opportunities to facilitate behavior change           | Holden (2009) [61]   |
| Large caseloads and pressure of waiting lists reduced the number of treatment sessions provided          | Holden (2009) [61]   |
| Limited opportunity to provide follow-up sessions after discharge                                        | Holden (2009) [61]   |
| <b>Lack of time due to other demands (or not further specified) (barrier)</b>                            |                      |
| The addition of a care support team may increase paperwork                                               | Egerton (2017) [32]  |
| Lack of time to monitor attendance/provide support was compounded by increasing administrative demands   | Law (2019) [37]      |
| Wait lists as a burden                                                                                   | MacKay (2018) [41]   |
| Lack of time                                                                                             | Rosemann (2006) [48] |



|                                                                                                                        |                      |
|------------------------------------------------------------------------------------------------------------------------|----------------------|
| Less satisfied about time needed to get used to e-Exercise during high work pressure/administrative burden             | Kloek (2020) [62]    |
| Perceiving web-based application as an additional burden                                                               | Kloek (2020) [62]    |
| Busy work schedules and administrative burden hindered testing/using e-Exercise in their practice                      | Kloek (2020) [62]    |
| Adequate duration of patient consultations (facilitator)                                                               |                      |
| Importance of longer consultations                                                                                     | Egerton (2018) [33]  |
| Having adequate time to spend with clients                                                                             | MacKay (2018) [41]   |
| Adequate duration of specific interventions or protocols (facilitator)                                                 |                      |
| Idea of having some of the burden of managing this patient group (e.g. time) taken away appealing                      | Egerton (2017) [32]  |
| Incorporating selected PCST components on as-needed basis most practical way within current environment                | Nielsen (2014) [45]  |
| Working according to the protocol is not/might not be too time-consuming (*)                                           | De Rooij (2020) [60] |
| Perceiving web-based application as time-saving                                                                        | Kloek (2020) [62]    |
| I do not/might not have insufficient time available to get familiar with e-Exercise and to use the web-application (*) | Kloek (2020) [62]    |

### Financial resources

| Description                                                                                       | Reference            |
|---------------------------------------------------------------------------------------------------|----------------------|
| Limited financial resources within organization (barrier)                                         |                      |
| Concern about capacity to recover costs of incorporating CBT into practice                        | Nielsen (2014) [45]  |
| Treatments (e.g. physiotherapy) prescribed less frequently due to decreasing financial resources  | Rosemann (2006) [48] |
| Financial reward for implementing LIs (facilitator)                                               |                      |
| Financial incentivisation                                                                         | Egerton (2017) [32]  |
| Payment system has to be changed to upgrade conservative treatments and conversation with patient | Rosemann (2006) [48] |
| Interventions performed by practice nurses have to be reinsured sufficiently                      | Rosemann (2006) [48] |
| Working according to the protocol should be financially rewarded (*)                              | De Rooij (2020) [60] |

### Information resources

| Description                                                                | Reference            |
|----------------------------------------------------------------------------|----------------------|
| Lack of information resources (barrier)                                    |                      |
| Absence of clear guidelines for weight loss                                | Allison (2019) [27]  |
| Lack of information about scheme hindered referral                         | Law (2019) [37]      |
| Lack of resources for face-to-face patient education and patient reference | Miller (2020) [44]   |
| Lack of information about self-help groups/offers on community level       | Rosemann (2006) [48] |
| Missing information about offers e.g. in the community                     | Rosemann (2006) [48] |
| Challenges in accessing information resources (barrier)                    |                      |
| Challenges in accessing scientific papers                                  | MacKay (2018) [41]   |
| Difficulty finding high quality, patient-friendly OA educational materials | Miller (2020) [44]   |

|                                                                                                     |                      |
|-----------------------------------------------------------------------------------------------------|----------------------|
| Frustration that material found on Internet or provided by friends/family was frequently inaccurate | Miller (2020) [44]   |
| Cannot access necessary resources (*)                                                               | Cottrell (2016) [53] |
| <b>Availability of information resources (facilitator)</b>                                          |                      |
| Clear preference for concrete guidelines or tools for engaging in weight management                 | Allison (2019) [27]  |
| Recommending informational materials for patients (to mitigate delays in OA care)                   | Miller (2020) [44]   |
| Standardised flowsheet on OA management (as guide for providers/tool for patient discussions)       | Miller (2020) [44]   |
| Specific information about program (suggestion for promotion and referrals)                         | Wallis (2020) [52]   |
| Clear referral criteria/guideline (*)                                                               | Hofstede (2016) [57] |
| <b>Access to information resources (facilitator)</b>                                                |                      |
| Having access to customizable, printable patient resources                                          | Egerton (2018) [33]  |
| Access to current evidence                                                                          | MacKay (2018) [41]   |
| Professional networks/community of practice as mechanism to facilitate sharing of information       | MacKay (2018) [41]   |
| Integrating scientific evidence from studies into their approach to management                      | MacKay (2020) [42]   |
| Including links on websites of partners (suggestion for promotion and referrals)                    | Wallis (2020) [52]   |

### Facilities

| Description                                                                                 | Reference           |
|---------------------------------------------------------------------------------------------|---------------------|
| <b>Negative attitude toward information technology (barrier)</b>                            |                     |
| Sceptical about benefit of clinical practice information technology                         | Egerton (2018) [33] |
| <b>Potential use of information technology (facilitator)</b>                                |                     |
| Changes to clinical practice information technology (e.g. prompts into clinic software)     | Egerton (2018) [33] |
| Having patient resources embedded within current practice software or routines              | Egerton (2018) [33] |
| Electronic reminders for physicians on how to locate OA treatment information and resources | Miller (2020) [44]  |
| <b>Benefits of working in health centers (facilitator)</b>                                  |                     |
| Collaboration among multiple disciplines could be facilitated by working in a health center | Selten (2017) [49]  |

### Domain 6: Capacity for organizational change

#### Professional paradigm

| Description                                                                                                 | Reference           |
|-------------------------------------------------------------------------------------------------------------|---------------------|
| <b>Adequate professional paradigm or suggestions for expansion (facilitator)</b>                            |                     |
| Nature of the physical therapy paradigm (in relation to weight management)                                  | Allison (2019) [27] |
| Physical therapy scope of practice was adequate to manage clients with perceived early knee OA              | MacKay (2018) [41]  |
| Suggestion that it would be useful to expand scope of practice to include ordering diagnostic imaging       | MacKay (2018) [41]  |
| Value of increasing profession's explicit understanding/use of PCST skills (practice model may be required) | Nielsen (2014) [45] |

|                                                                                                                 |                     |
|-----------------------------------------------------------------------------------------------------------------|---------------------|
| Value of incorporating aspects of PCST mind-set into professional training (entry-level vs. postgraduate level) | Nielsen (2014) [45] |
|-----------------------------------------------------------------------------------------------------------------|---------------------|

### *Monitoring*

| Description                                       | Reference            |
|---------------------------------------------------|----------------------|
| Audit (facilitator)                               |                      |
| Peer review/audit of professional association (*) | Hofstede (2016) [57] |

### *Support within the organization*

| Description                                                                                                                              | Reference            |
|------------------------------------------------------------------------------------------------------------------------------------------|----------------------|
| Management not supportive (barrier)                                                                                                      |                      |
| The management of my practice is not/might not be collaborative regarding the application of the protocol in daily clinical practice (*) | De Rooij (2020) [60] |

## Domain 7: Social, political, and legal factors

### *Healthcare system*

| Description                                                                                                            | Reference            |
|------------------------------------------------------------------------------------------------------------------------|----------------------|
| Restrictions due to health insurance (barrier)                                                                         |                      |
| Lack of funding prevented clients from accessing services/seeking help/getting full course of treatment                | MacKay (2018) [41]   |
| Treatments (e.g. physiotherapy) prescribed less frequently due to increasing restrictions by health insurances         | Rosemann (2006) [48] |
| The number of treatments that the patient receives from their insurance company is a barrier in using the protocol (*) | De Rooij (2020) [60] |
| Number of treatment sessions patients receive from insurance companies restricted application of the strategy          | De Rooij (2020) [60] |
| Benefits of good health insurance (facilitator)                                                                        |                      |
| Patients who are well insured have improved access to services (e.g. physical therapy)                                 | Miller (2020) [44]   |
| Positivity toward private sector (patients will get seen a lot quicker)                                                | Okwera (2019) [46]   |
| Private healthcare supplementation (as suggestion for physiotherapy service improvement)                               | Okwera (2019) [46]   |
| In complex patients insurance companies should reimburse more treatment sessions                                       | De Rooij (2020) [60] |
| Government subsidies (facilitator)                                                                                     |                      |
| Government-subsidised allied health visits to facilitate utilisation of services that support exercise/weight loss     | Egerton (2018) [33]  |

## Domain 8: Patient and HCP interactions

### *Therapeutic alliance*

| Description | Reference |
|-------------|-----------|
|-------------|-----------|

|                                                                                               |                      |
|-----------------------------------------------------------------------------------------------|----------------------|
| Potential negative influence of implementing LIs to relationship (barrier)                    |                      |
| Feelings of guilt when referring to LMP (dooming patients to a longer wait for surgery)       | Law (2019) [37]      |
| Importance of communication and relationship (facilitator)                                    |                      |
| Strong therapeutic relationship with patients                                                 | Lawford (2020) [39]  |
| Having positive attitude/being encouraging of small changes/being hopeful about OA management | MacKay (2020) [42]   |
| More openly address psychological complaints of patients                                      | Rosemann (2006) [48] |
| Good communication with patient may help in delaying surgery                                  | Selten (2017) [49]   |
| Importance of having trust                                                                    | Selten (2017) [49]   |

### *Lifestyle as conversation topic*

| Description                                                                                                        | Reference           |
|--------------------------------------------------------------------------------------------------------------------|---------------------|
| Challenges of discussing weight (barrier)                                                                          |                     |
| Perceived impact of own weight during weight discussions (not being overweight)                                    | Allison (2019) [27] |
| Apparent discomfort with having conversations about weight                                                         | Allison (2019) [27] |
| Concern about how weight conversations might threaten patient rapport                                              | Allison (2019) [27] |
| Weight loss is sensitive topic (afraid of upsetting their patients results in temptation to avoid discussion)      | Egerton (2018) [33] |
| Weight was touchy/sensitive subject to discuss                                                                     | MacKay (2020) [42]  |
| Difficulties in communicating with patients about being overweight                                                 | Selten (2017) [49]  |
| Viewing weight as sensitive subject/feeling uncomfortable discussing it                                            | Tang (2020) [50]    |
| Factors that could ease the way to discussing weight (facilitator)                                                 |                     |
| Perceived impact of own weight during weight discussions (being overweight)                                        | Allison (2019) [27] |
| Feeling comfortable discussing role of physical activity in maintaining weight control                             | MacKay (2020) [42]  |
| Developing rapport with people made it easier to discuss weight management                                         | MacKay (2020) [42]  |
| Reframe discussions around exercise and weight loss (e.g. not blaming/discouraging people)                         | Miller (2020) [44]  |
| Relationship with patients, developed through numerous sessions, facilitated influence for lifestyle modifications | Poitras (2010) [47] |
| Having a relationship with patient built on mutual trust/respect would ease way to discussing weight reduction     | Selten (2017) [49]  |

### Domain 9: Disease factors

#### *Image*

| Description                                                                               | Reference                |
|-------------------------------------------------------------------------------------------|--------------------------|
| OA seen as low priority (barrier)                                                         |                          |
| Assigning low priority to OA as disease                                                   | Christiansen (2020) [29] |
| Concern about providing this service for a condition perceived as low priority            | Egerton (2017) [32]      |
| OA was not given enough attention, symptoms were often dismissed/minimized in health care | Mann (2011) [43]         |

|                                                                                                                   |                      |
|-------------------------------------------------------------------------------------------------------------------|----------------------|
| Medical professionals saw OA as low priority with respect to managing their workload                              | Okwera (2019) [46]   |
| Knee OA more often diagnosed as an unanticipated comorbidity (rarely primary reason for consultation)             | Poitras (2010) [47]  |
| Not enough emphasis put on primary prevention of knee OA                                                          | Poitras (2010) [47]  |
| Knee OA management seen as unchallenging routine                                                                  | Poitras (2010) [47]  |
| Belief that nobody is willing to change lifestyle due to OA, disease has to be a lot worse                        | Rosemann (2006) [48] |
| OA seen as untreatable and local condition (wear-and-tear) (barrier)                                              |                      |
| Describing OA as simply a problem of cartilage degeneration/joint space narrowing (on x-ray)/wear and tear        | Egerton (2018) [33]  |
| Belief that symptoms will progress, and that surgery is inevitable                                                | Egerton (2018) [33]  |
| Assumption that patients would have negative connotations associated with the label knee OA                       | Egerton (2018) [33]  |
| No effective treatment options                                                                                    | Miller (2020) [44]   |
| Incurable nature and negative prognosis of OA                                                                     | Okwera (2019) [46]   |
| Knee OA seen as uninteresting health problem on which they had limited impact and could not cure                  | Poitras (2010) [47]  |
| Knee OA was perceived as a degenerative (wear and tear)                                                           | Teo (2020) [51]      |
| Using negative language to describe OA (wear-and-tear/joint damage/bone-on-bone/degenerative condition)           | Wallis (2020) [52]   |
| Biomedical perspective on knee OA, attributing signs and symptoms to local knee pathology or wear and tear        | Holden (2009) [61]   |
| OA seen as chronic degenerative condition that would progressively worsen over time (only cure being surgery)     | Holden (2009) [61]   |
| Optimistic views toward OA (facilitator)                                                                          |                      |
| Belief that knee OA is condition that can be successfully managed                                                 | Egerton (2018) [33]  |
| Importance of conveying to patients that diagnosis is not all negative/delivering a relatively positive prognosis | Egerton (2018) [33]  |
| Knee OA seen as technically challenging condition                                                                 | Poitras (2010) [47]  |
